# Supplementary material for: Pyridazinone-based derivatives as anticancer agents endowed with anti-microbial activity: molecular design, synthesis, and biological investigation
Source: Royal Society of Chemistry journal article supplement (doi:10.1039/d4md00481g), 2024-01-01
Supplement: d4md00481g1.pdf [file d4md00481g1.pdf]

# **Supplementary Data**

## *Table of Contents*

| Item                                                        | Page    |
|-------------------------------------------------------------|---------|
| 1. Spectral data of Series I (8a-j) .....                   | 1-30    |
| 2. Spectral data of Series II (9a-d) .....                  | 31-42   |
| 3. Spectral data of Series III (10a-l).....                 | 43-78   |
| 4. Spectral data of Series IV (11a-f).....                  | 79-96   |
| 5. Spectral data of series V (17a and 17b) .....            | 97-98   |
| Spectral data of series VI (18a and 18b) .....              | 99-100  |
| Spectral data of series VI (19a and 19b).....               | 101-140 |
| 6. Elemental analysis of some final compounds.....          | 103-105 |
| 7. X-ray powder diffraction (XRD) study.....                | 106     |
| 8. Biological results.....                                  | 107     |
| 8.1. Antimicrobial screening.....                           | 107     |
| 8.2. Antiproliferative                                      | 108     |
| results.....                                                | 108     |
| 8.2.1. Anti-VEGFR-2 screening.....                          |         |
| 8.2.2. In vitro single dose assay of the active synthesized |         |
| compound.....                                               | 109-120 |
| 8.2.3. In vitro five dose assays of the active synthesized  |         |
| compound.....                                               | 121-122 |
| 9. Molecular docking studies.....                           | 123-125 |
| 10. Cell Cycle apoptosis.....                               | 126     |
| 11. Cell Cycle analysis.....                                | 127-132 |

# 1. Spectral data of Series I:

## 1.1. Compound 8a

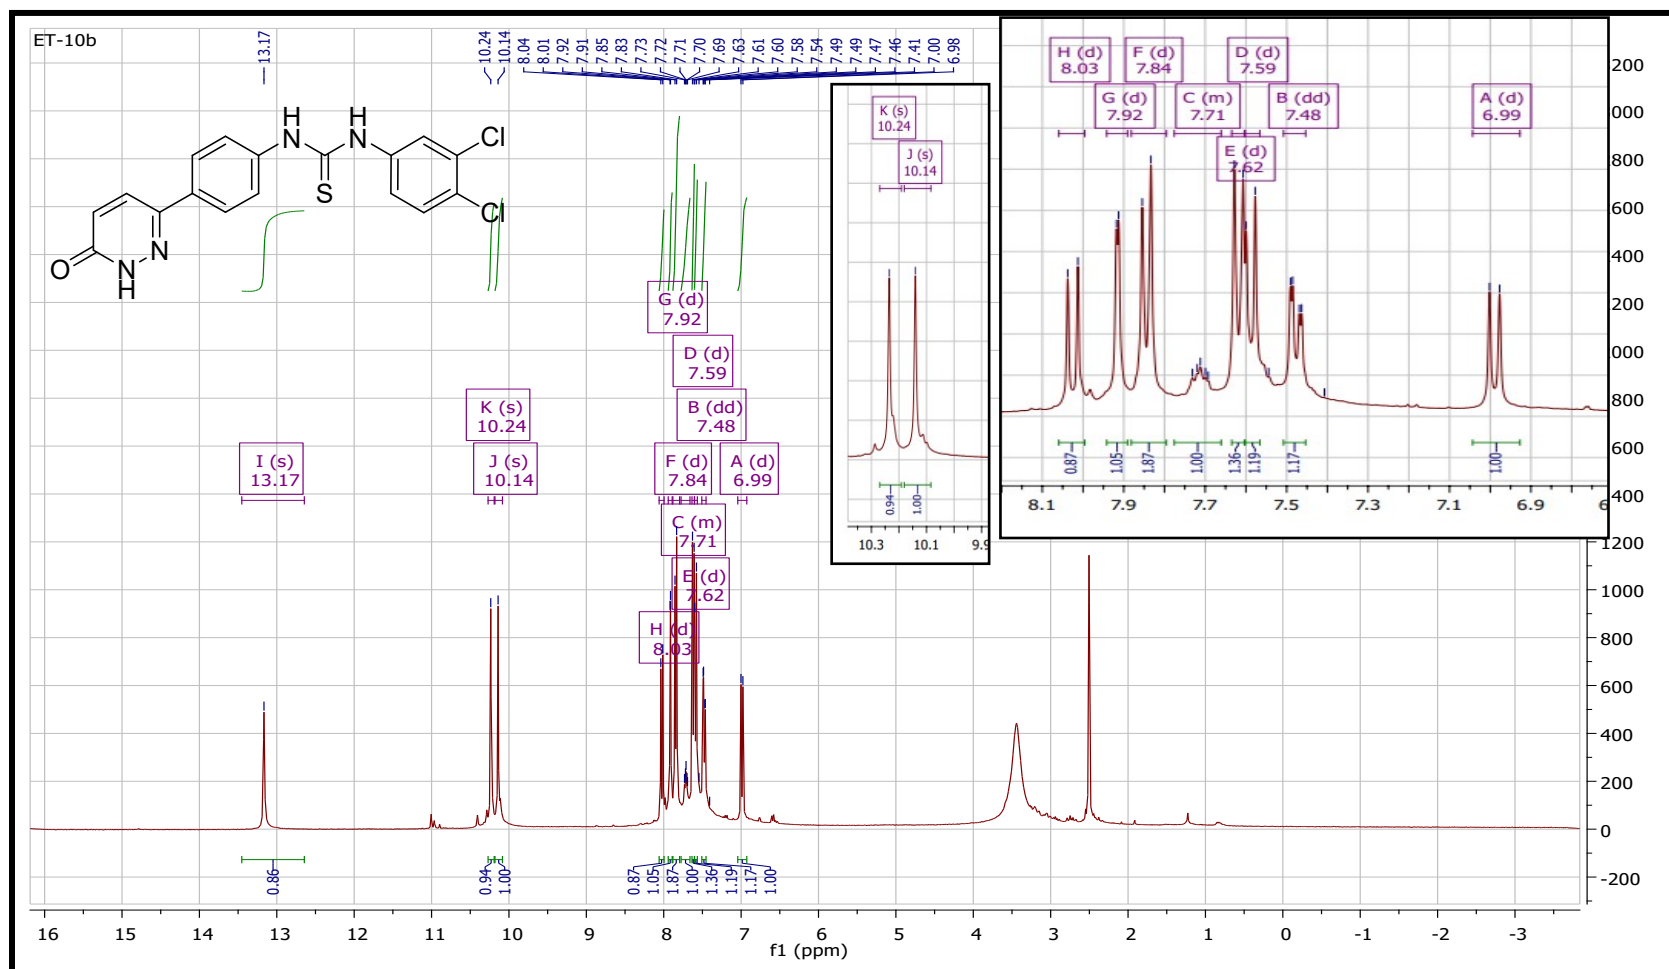

Figure 1a. <sup>1</sup>H NMR spectrum (400 MHz) of compound 8a in DMSO-d<sub>6</sub>.

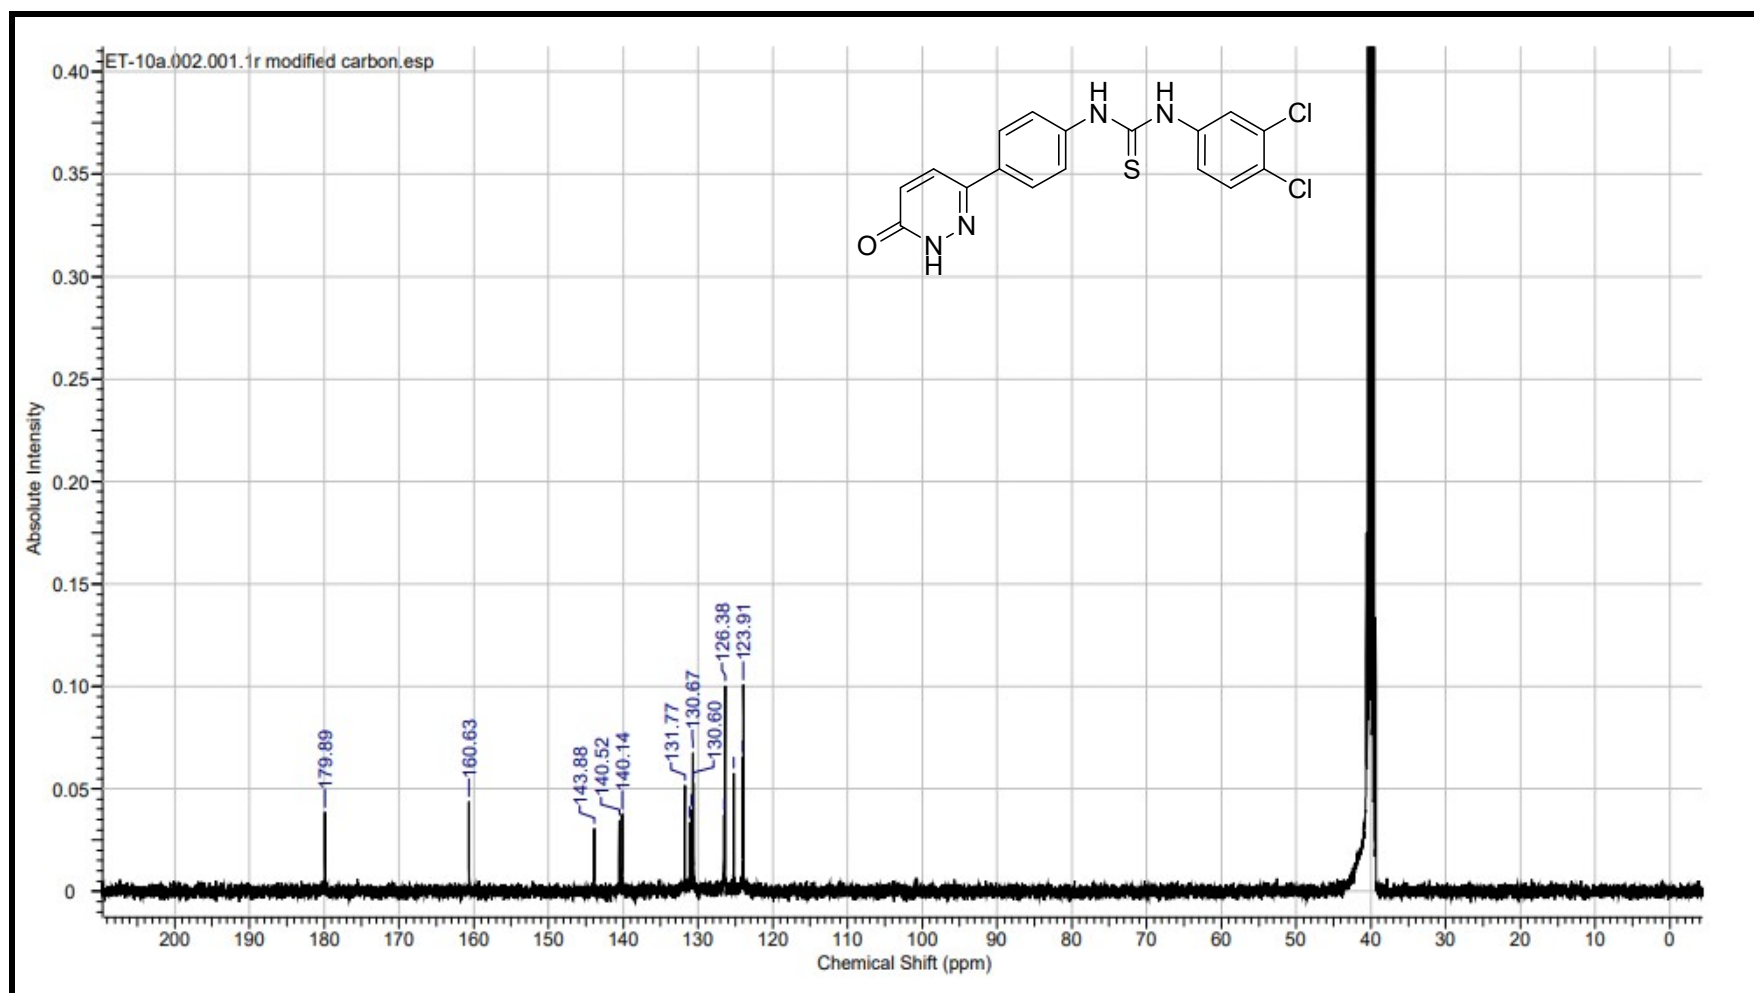

**Figure 1b.**  $^{13}\text{C}$  NMR spectrum (100 MHz) of compound 8a in  $\text{DMSO-d}_6$ .

### Single Mass Analysis

Tolerance = 3.0 PPM / DBE: min = -1.5, max = 20.0

Element prediction: Off

Number of isotope peaks used for i-FIT = 3

Monoisotopic Mass, Even Electron Ions

572 formula(e) evaluated with 1 results within limits (up to 50 best isotopic matches for each mass)

Elements Used:

C: 0-30 H: 0-30 N: 0-5 O: 0-2 S: 0-1 35Cl: 0-2 37Cl: 0-1

ET-10b/AJ

SYNAPTG2-Si#NotSet

07-Mar-2023

67581

09:50:34

0653 304 (0.615) Cm (302:429-92:112)

1: TOF MS ES+

4.30e+006

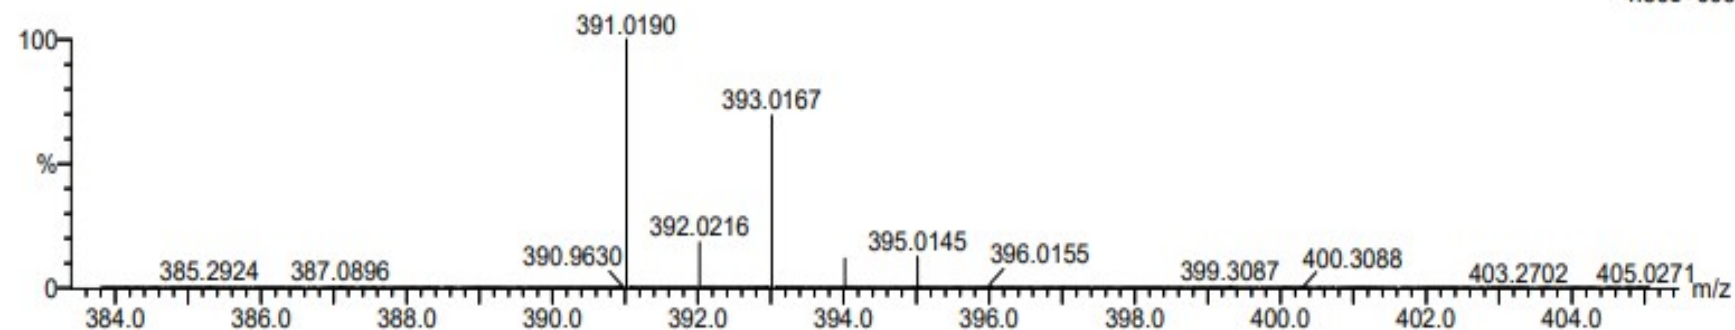

Minimum:

Maximum:

5.0 3.0 -1.5  
20.0

| Mass     | Calc. Mass | mDa | PPM | DBE  | i-FIT  | Formula              |
|----------|------------|-----|-----|------|--------|----------------------|
| 391.0190 | 391.0187   | 0.3 | 0.8 | 12.5 | 3385.1 | C17 H13 N4 O S 35Cl2 |

Figure 1c. HRMS of compound 8a.

## 1.2. Compound 8b

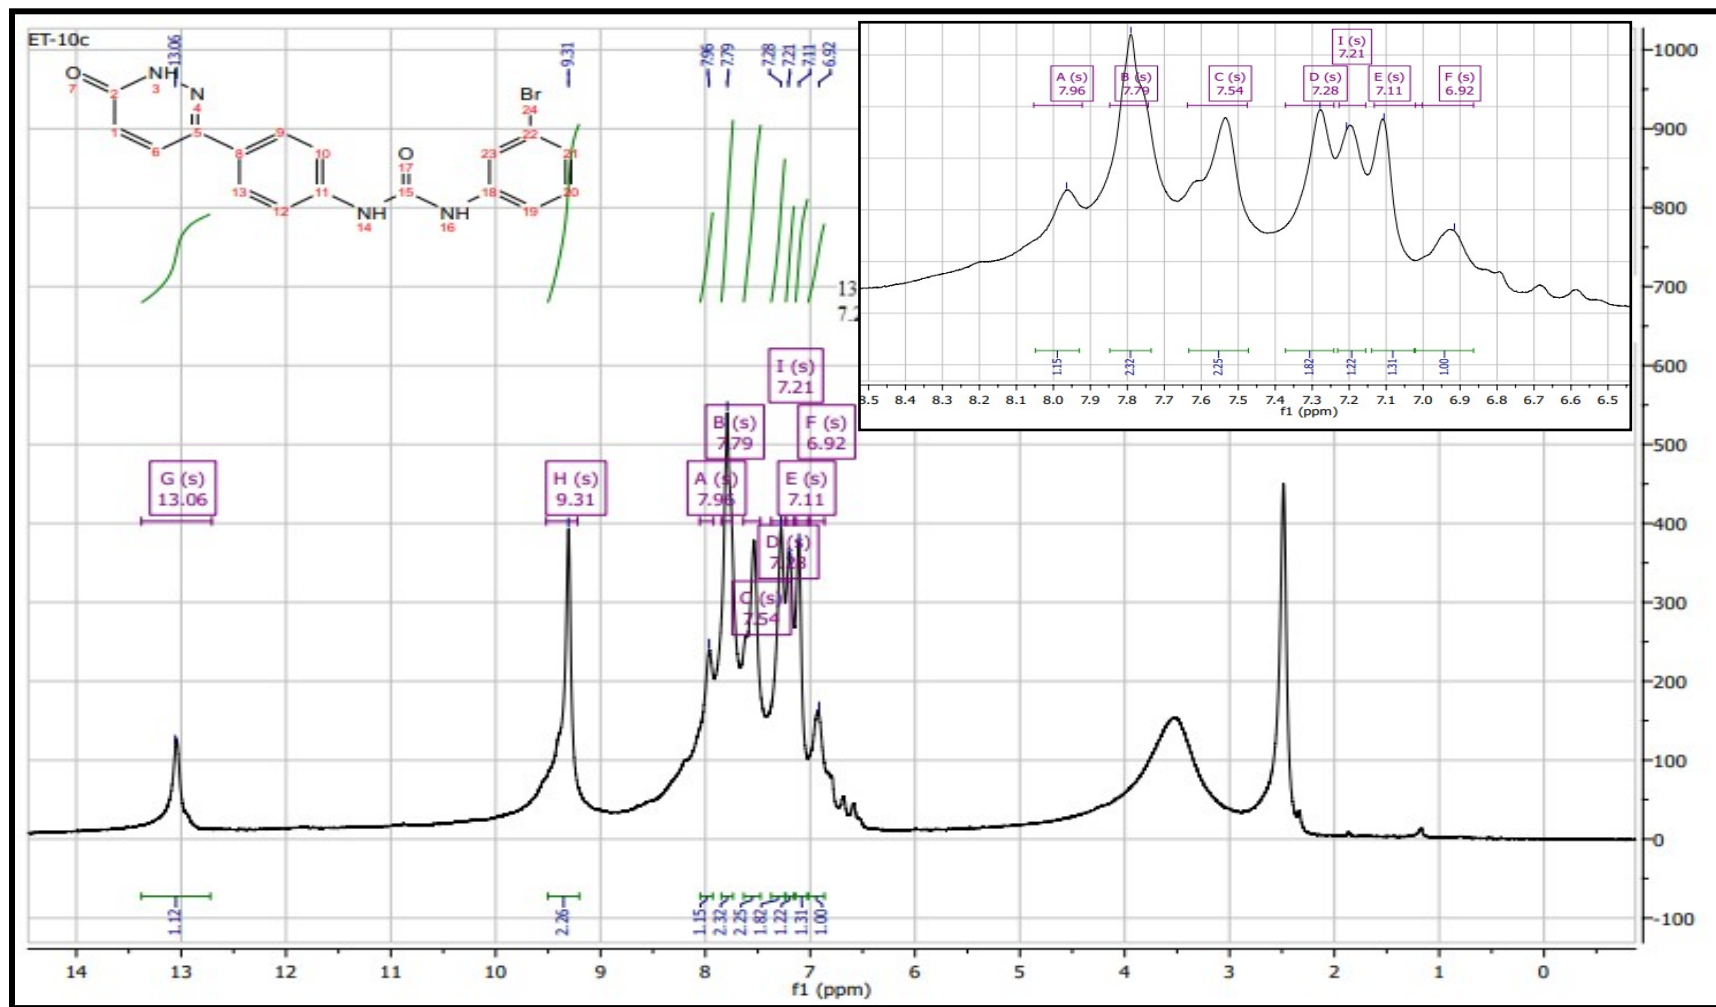

Figure 2a.  $^1\text{H}$  NMR spectrum (400 MHz) of compound 8b in  $\text{DMSO-d}_6$ .

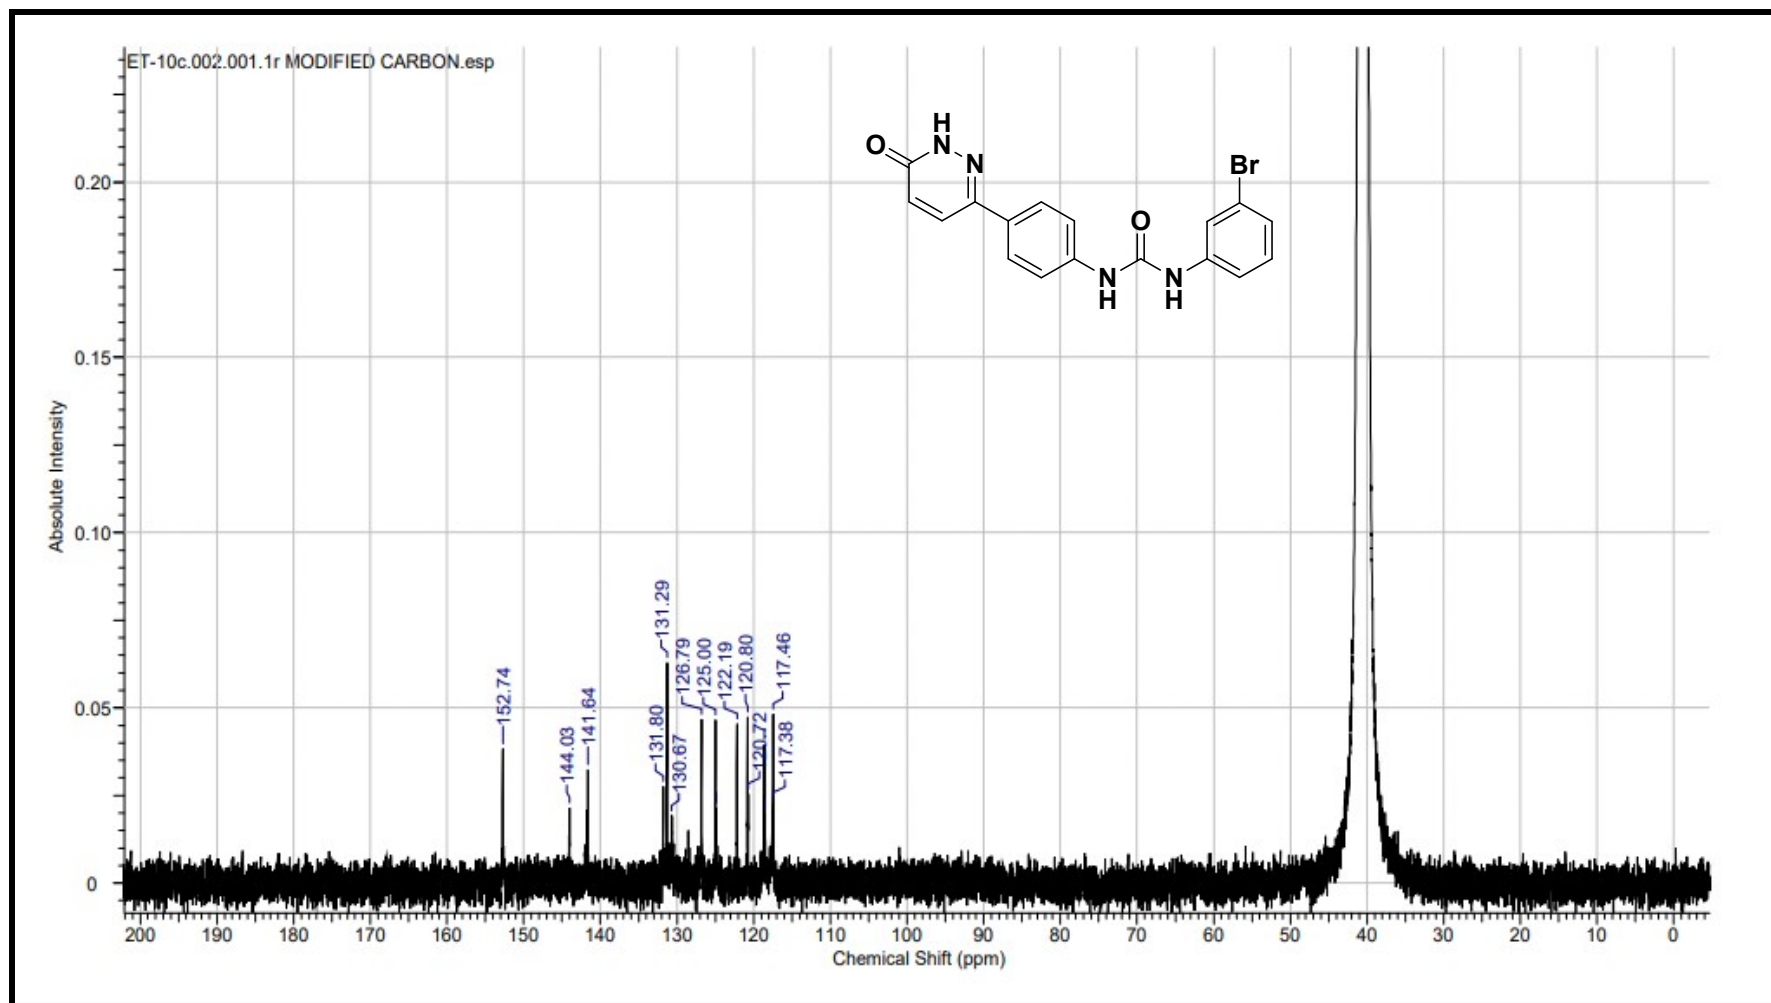

**Figure 2b.**  $^{13}\text{C}$  NMR spectrum (100 MHz) of compound 8b in  $\text{DMSO-d}_6$ .

### Single Mass Analysis

Tolerance = 3.0 PPM / DBE: min = -1.5, max = 25.0

Element prediction: Off

Number of isotope peaks used for i-FIT = 3

Monoisotopic Mass, Even Electron Ions

127 formula(e) evaluated with 1 results within limits (up to 50 best isotopic matches for each mass)

Elements Used:

C: 0-20 H: 0-20 N: 0-4 O: 0-4 79Br: 0-1 81Br: 0-1

ET-10c/AJ

SYNAPTG2-Si#NotSet

07-Mar-2023

67594

13:38:43

0672 689 (1.372) Cm (624:827)

1: TOF MS ES+

9.39e+006

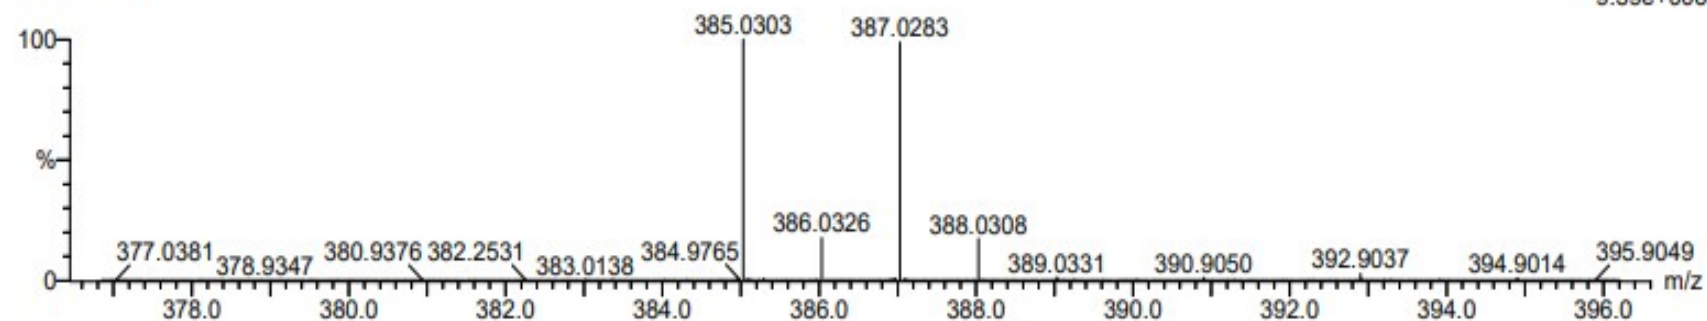

Minimum:

-1.5

Maximum:

5.0

3.0

25.0

Mass

Calc. Mass

mDa

PPM

DBE

i-FIT

Formula

385.0303

385.0300

0.3

0.8

12.5

3927.6

C17 H14 N4 O2 79Br

Figure 2c. HRMS of compound 8b.



### 1.3. Compound 8c

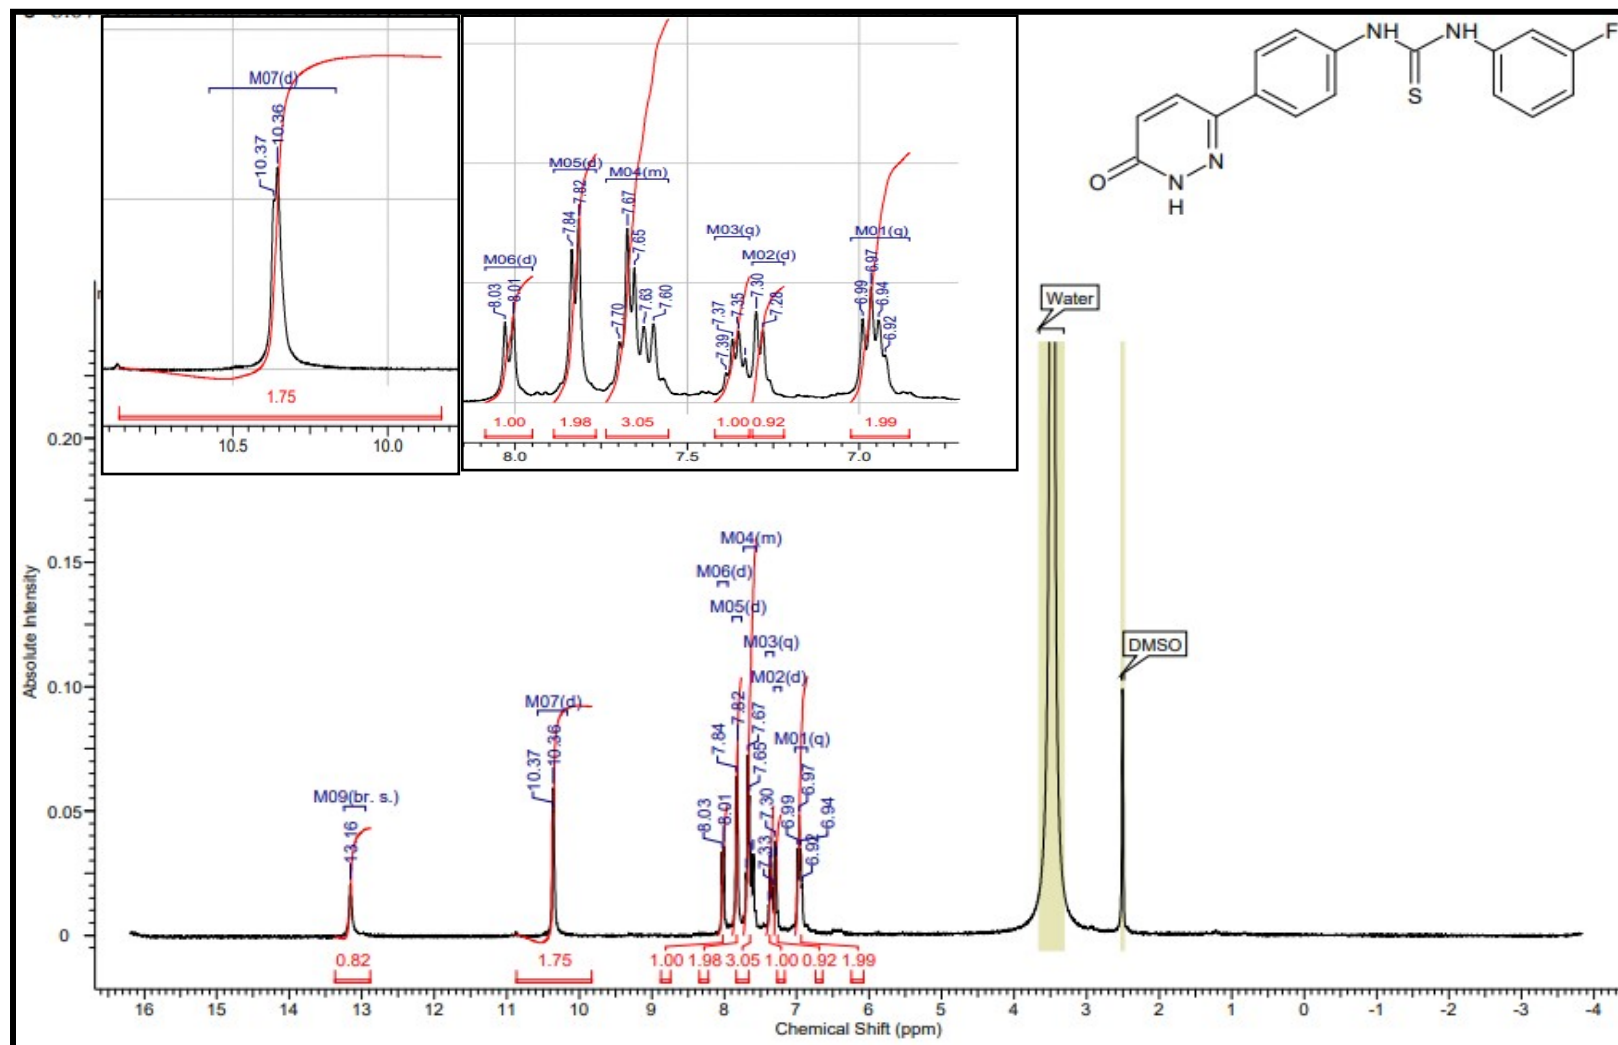

Figure 3a. <sup>1</sup>H NMR spectrum (400 MHz) of compound 8c in DMSO-d<sub>6</sub>.

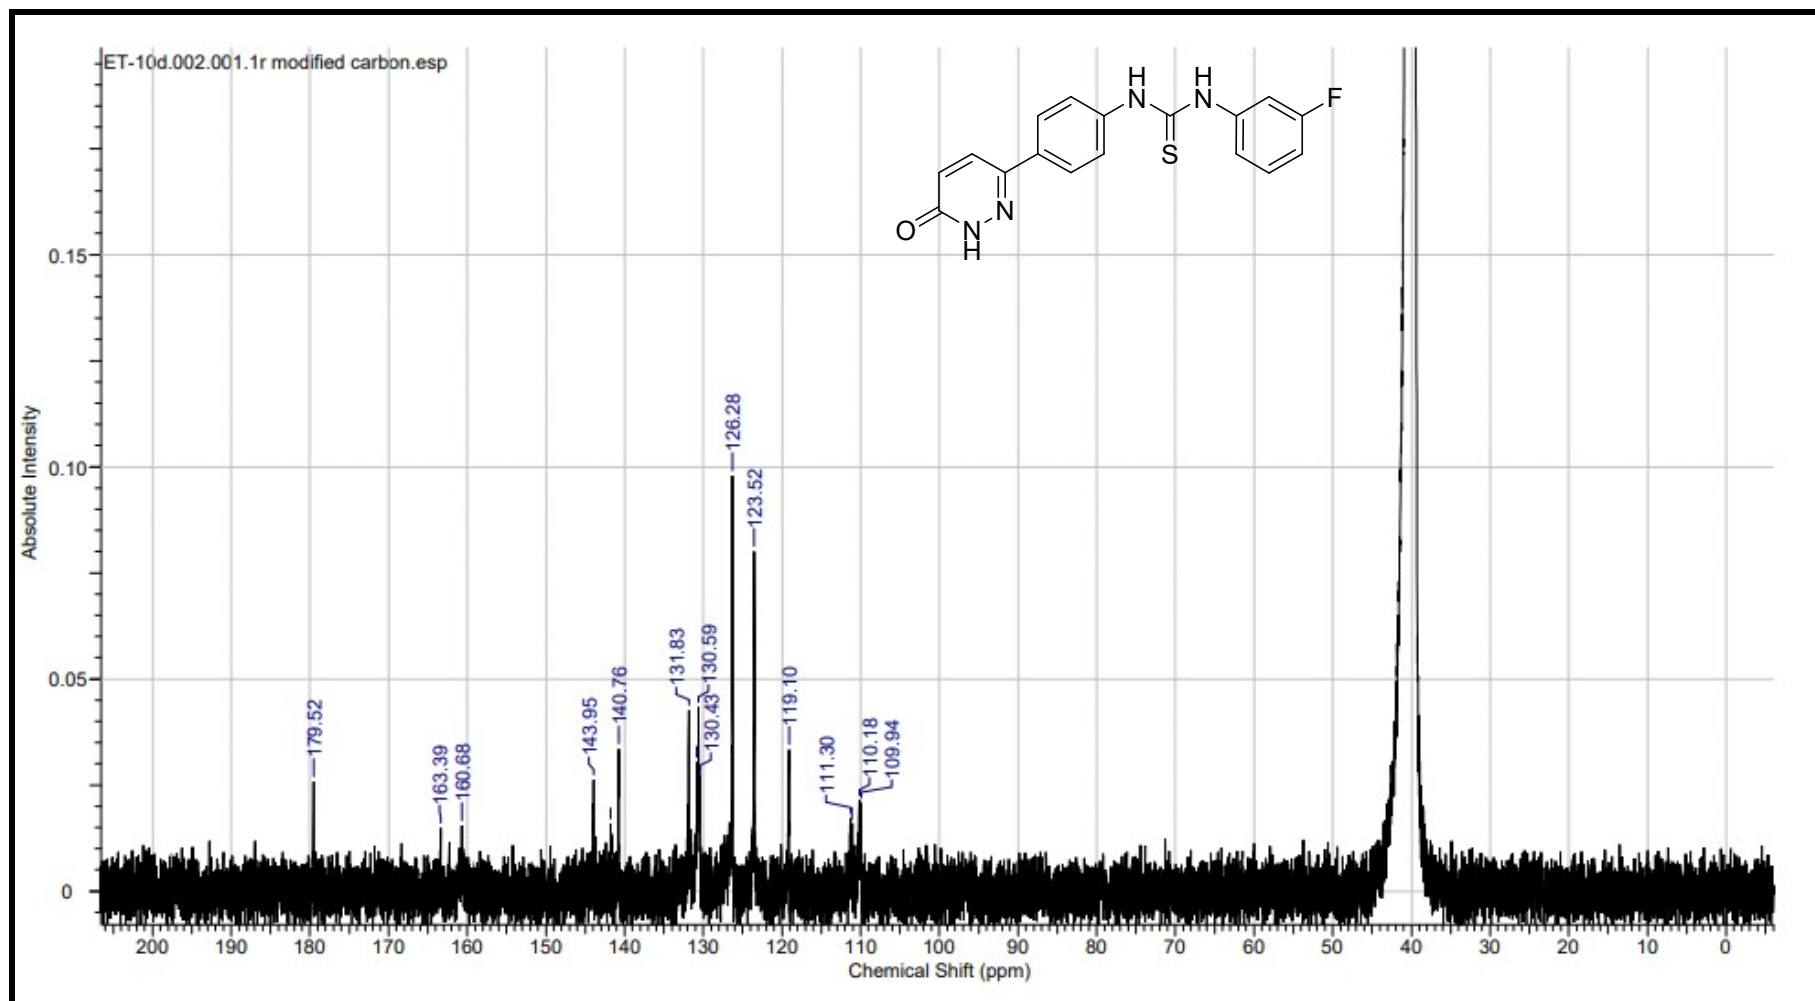

**Figure 3b.**  $^{13}\text{C}$  NMR spectrum (100 MHz) of compound 8c in  $\text{DMSO-d}_6$ .

### Single Mass Analysis

Tolerance = 3.0 PPM / DBE: min = -1.5, max = 15.0

Element prediction: Off

Number of isotope peaks used for i-FIT = 3

Monoisotopic Mass, Even Electron Ions

400 formula(e) evaluated with 1 results within limits (up to 50 best isotopic matches for each mass)

Elements Used:

C: 0-50 H: 0-50 N: 0-5 O: 0-3 S: 0-1 F: 0-1

ET-10d/AJ

SYNAPTG2-Si#NotSet

06-Mar-2023

67577

15:36:36

0648 726 (1.443) Cm (708:730)

1: TOF MS ES+

6.41e+005

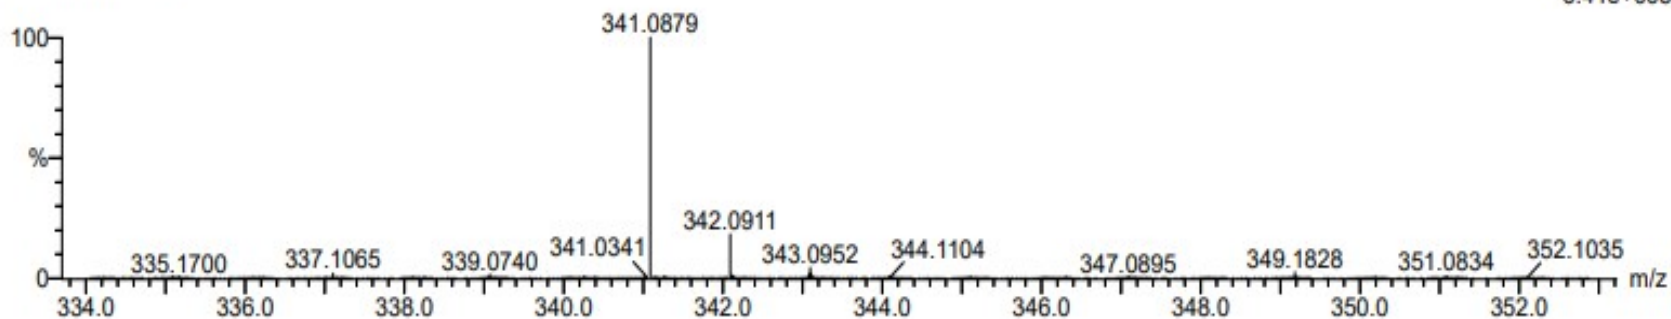

Minimum: -1.5  
Maximum: 5.0 3.0 15.0

| Mass     | Calc. Mass | mDa | PPM | DBE  | i-FIT  | Formula          |
|----------|------------|-----|-----|------|--------|------------------|
| 341.0879 | 341.0872   | 0.7 | 2.1 | 12.5 | 1979.2 | C17 H14 N4 O S F |

**Figure 3c. HRMS of compound 8c.**

## 1.4. Compound 8d

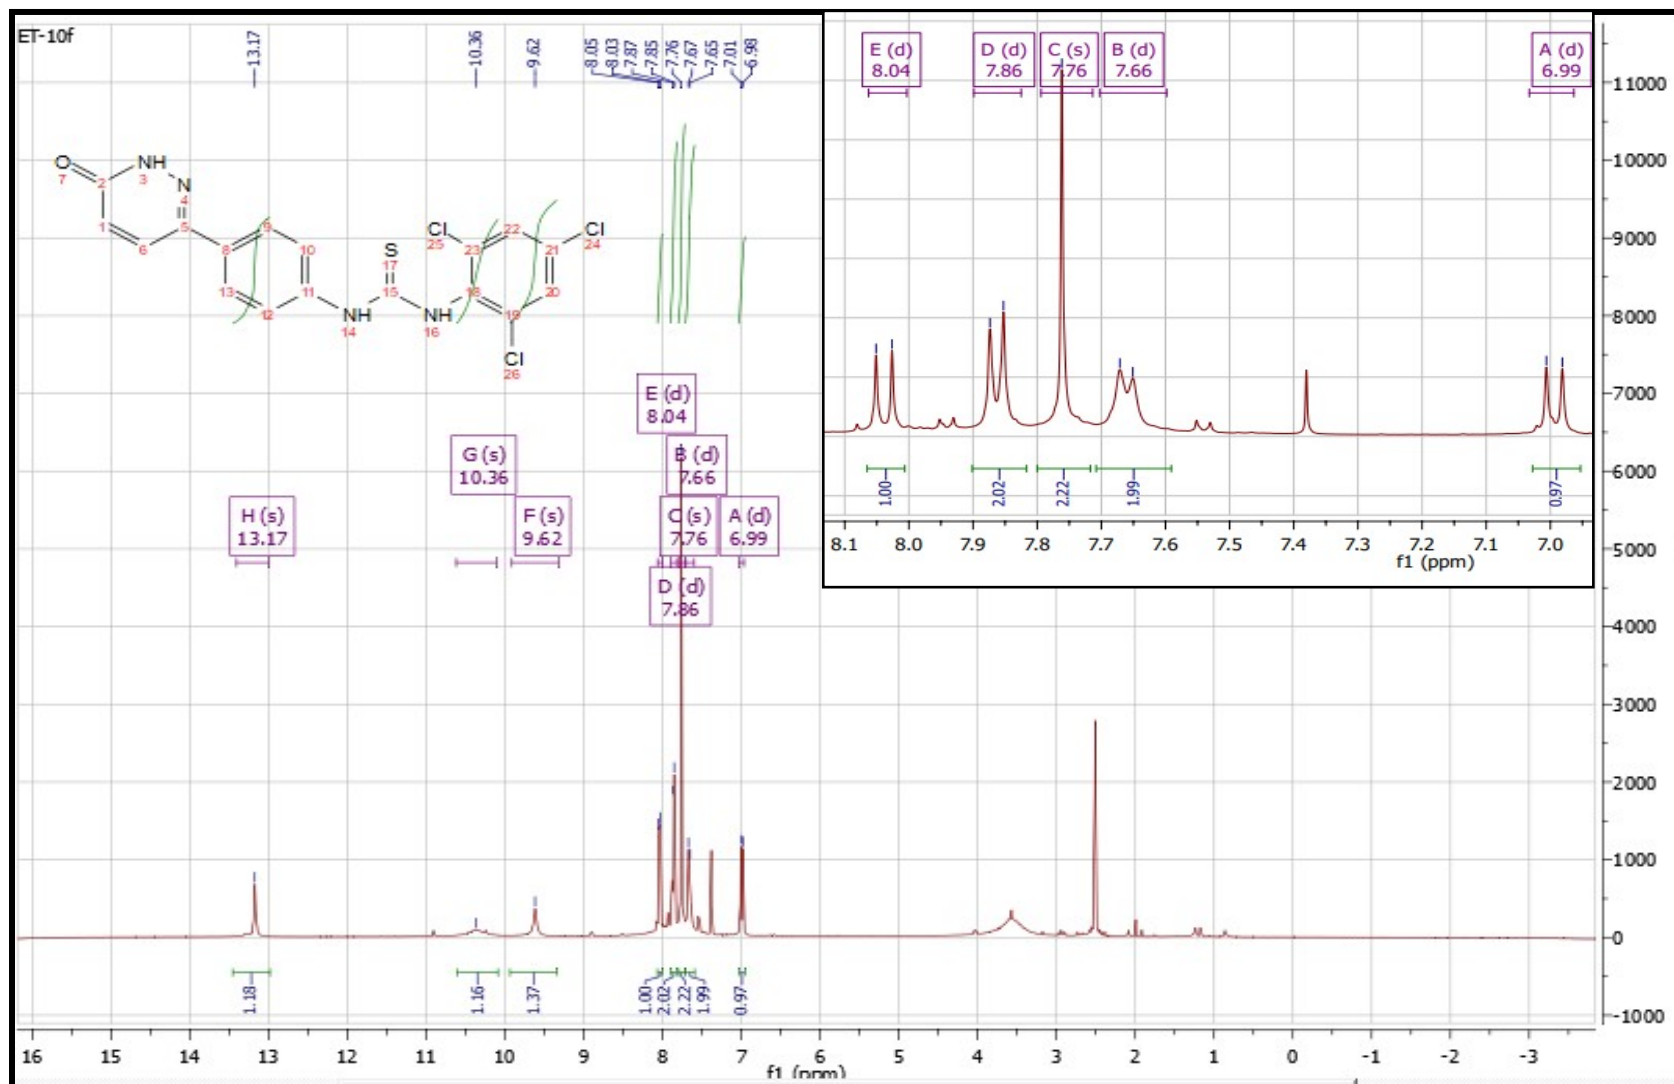

Figure 4a. <sup>1</sup>H NMR spectrum (400 MHz) of compound 8d in DMSO-d<sub>6</sub>.

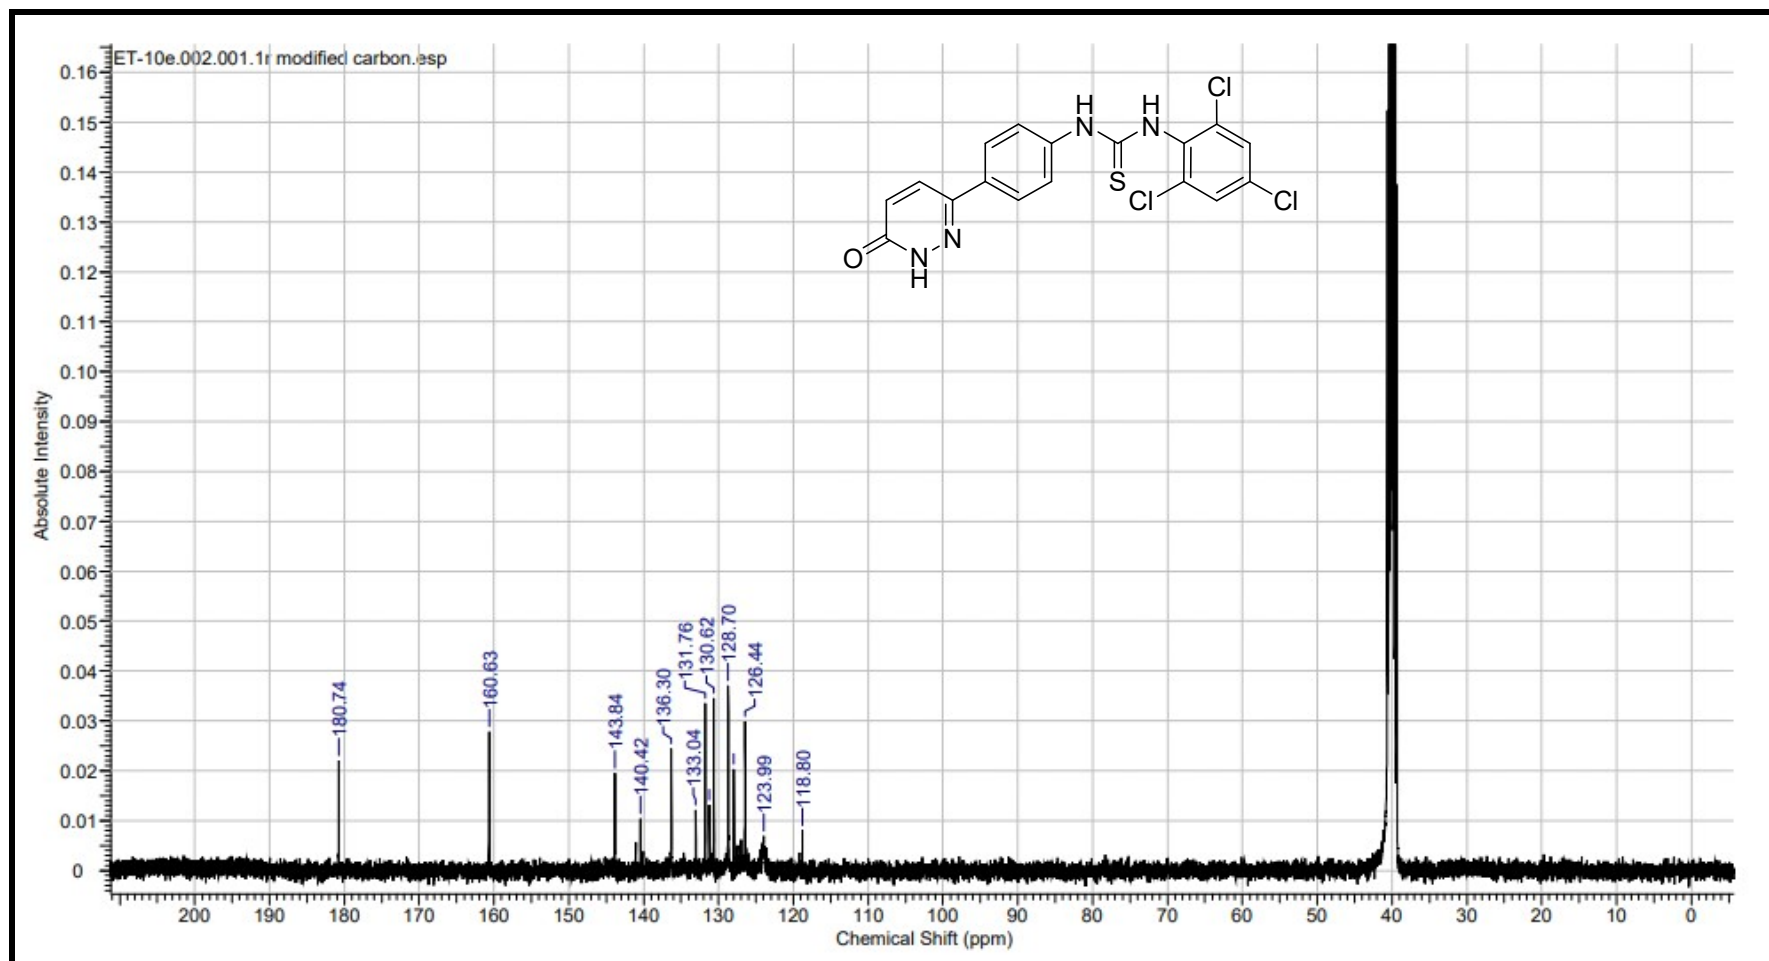

**Figure 4b.**  $^{13}\text{C}$  NMR spectrum (100 MHz) of compound 8d in  $\text{DMSO-d}_6$ .

### Single Mass Analysis

Tolerance = 3.0 PPM / DBE: min = -1.5, max = 20.0

Element prediction: Off

Number of isotope peaks used for i-FIT = 3

Monoisotopic Mass, Even Electron Ions

863 formula(e) evaluated with 1 results within limits (up to 50 best isotopic matches for each mass)

Elements Used:

C: 0-60 H: 0-60 N: 0-5 O: 0-1 S: 0-1 35Cl: 0-3 37Cl: 0-1

ET-10f/AJ

SYNAPTG2-Si#NotSet

07-Mar-2023

67587

12:33:13

0665 775 (1.540) Cm (761:775)

1: TOF MS ES+

9.82e+005

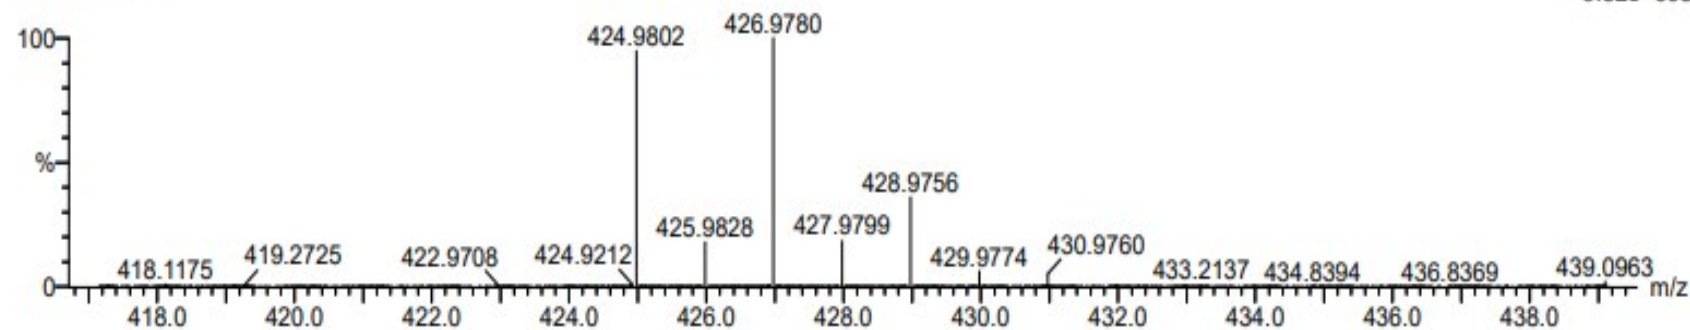

Minimum:

Maximum: 5.0 3.0 -1.5

| Mass     | Calc. Mass | mDa | PPM | DBE  | i-FIT  | Formula              |
|----------|------------|-----|-----|------|--------|----------------------|
| 424.9802 | 424.9797   | 0.5 | 1.2 | 12.5 | 2152.7 | C17 H12 N4 O S 35Cl3 |

Figure 4c. HRMS of compound 8d.

## 1.5. Compound 8e

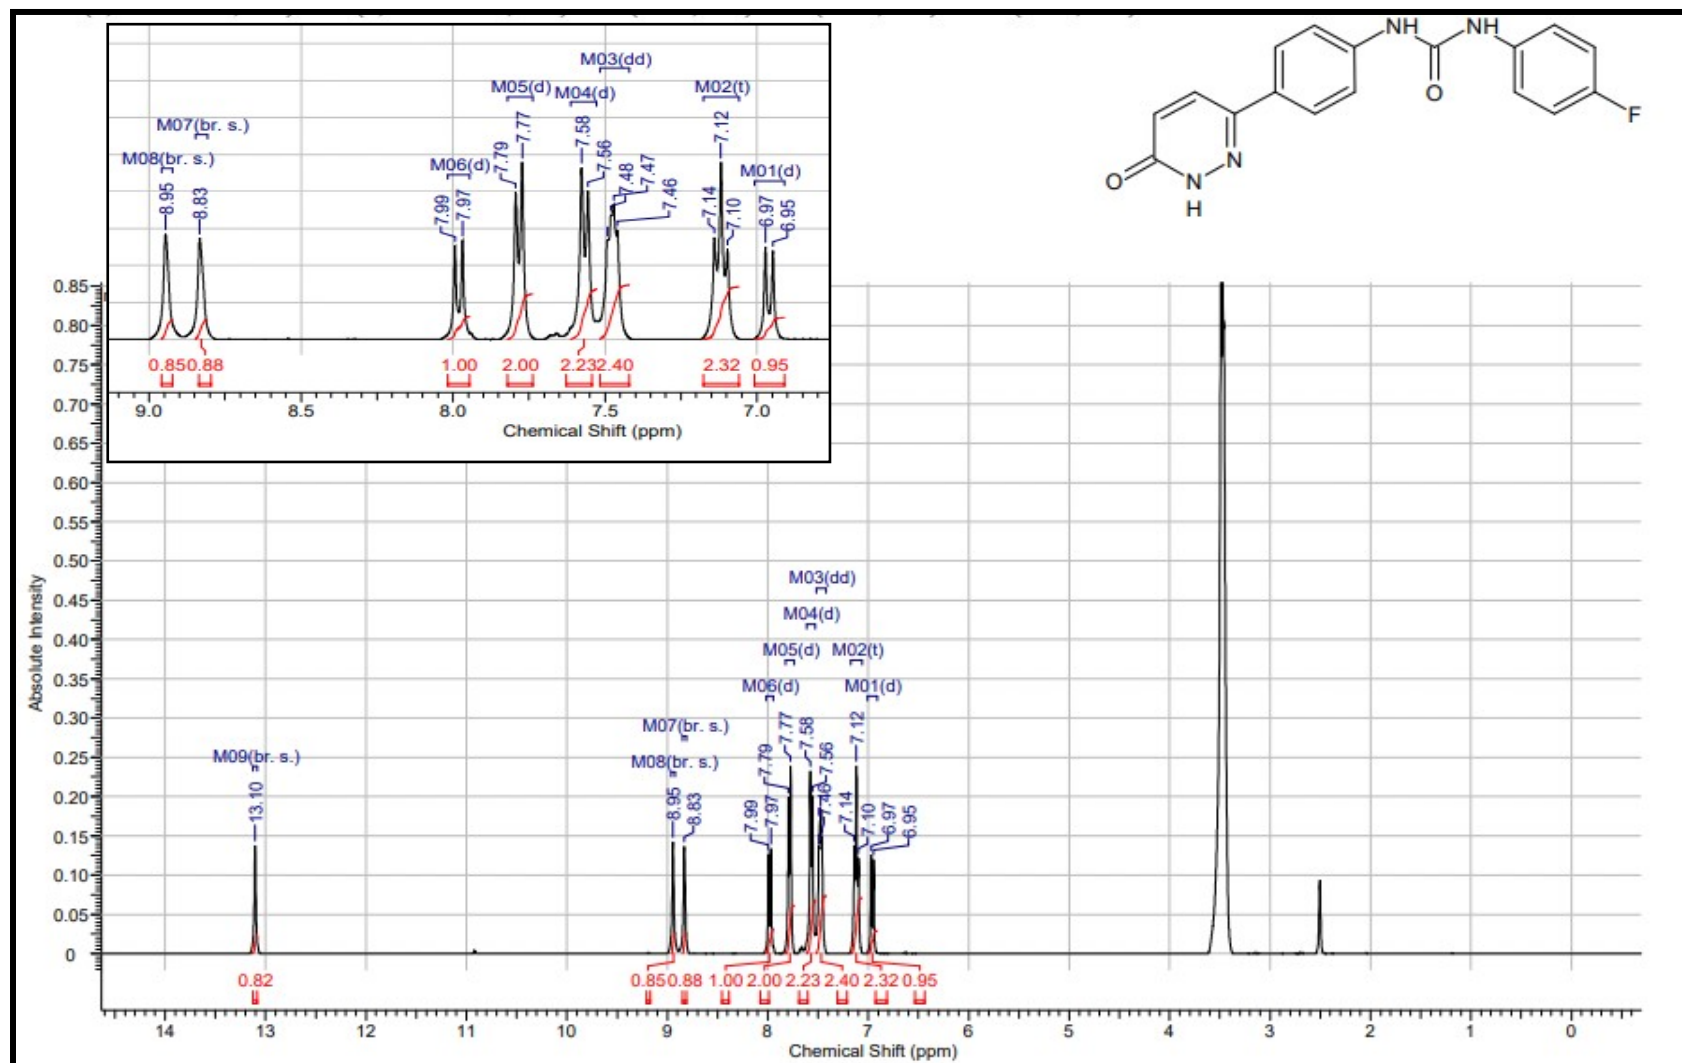

Figure 5a. <sup>1</sup>H NMR spectrum (400 MHz) of compound 8e in DMSO-d<sub>6</sub>.

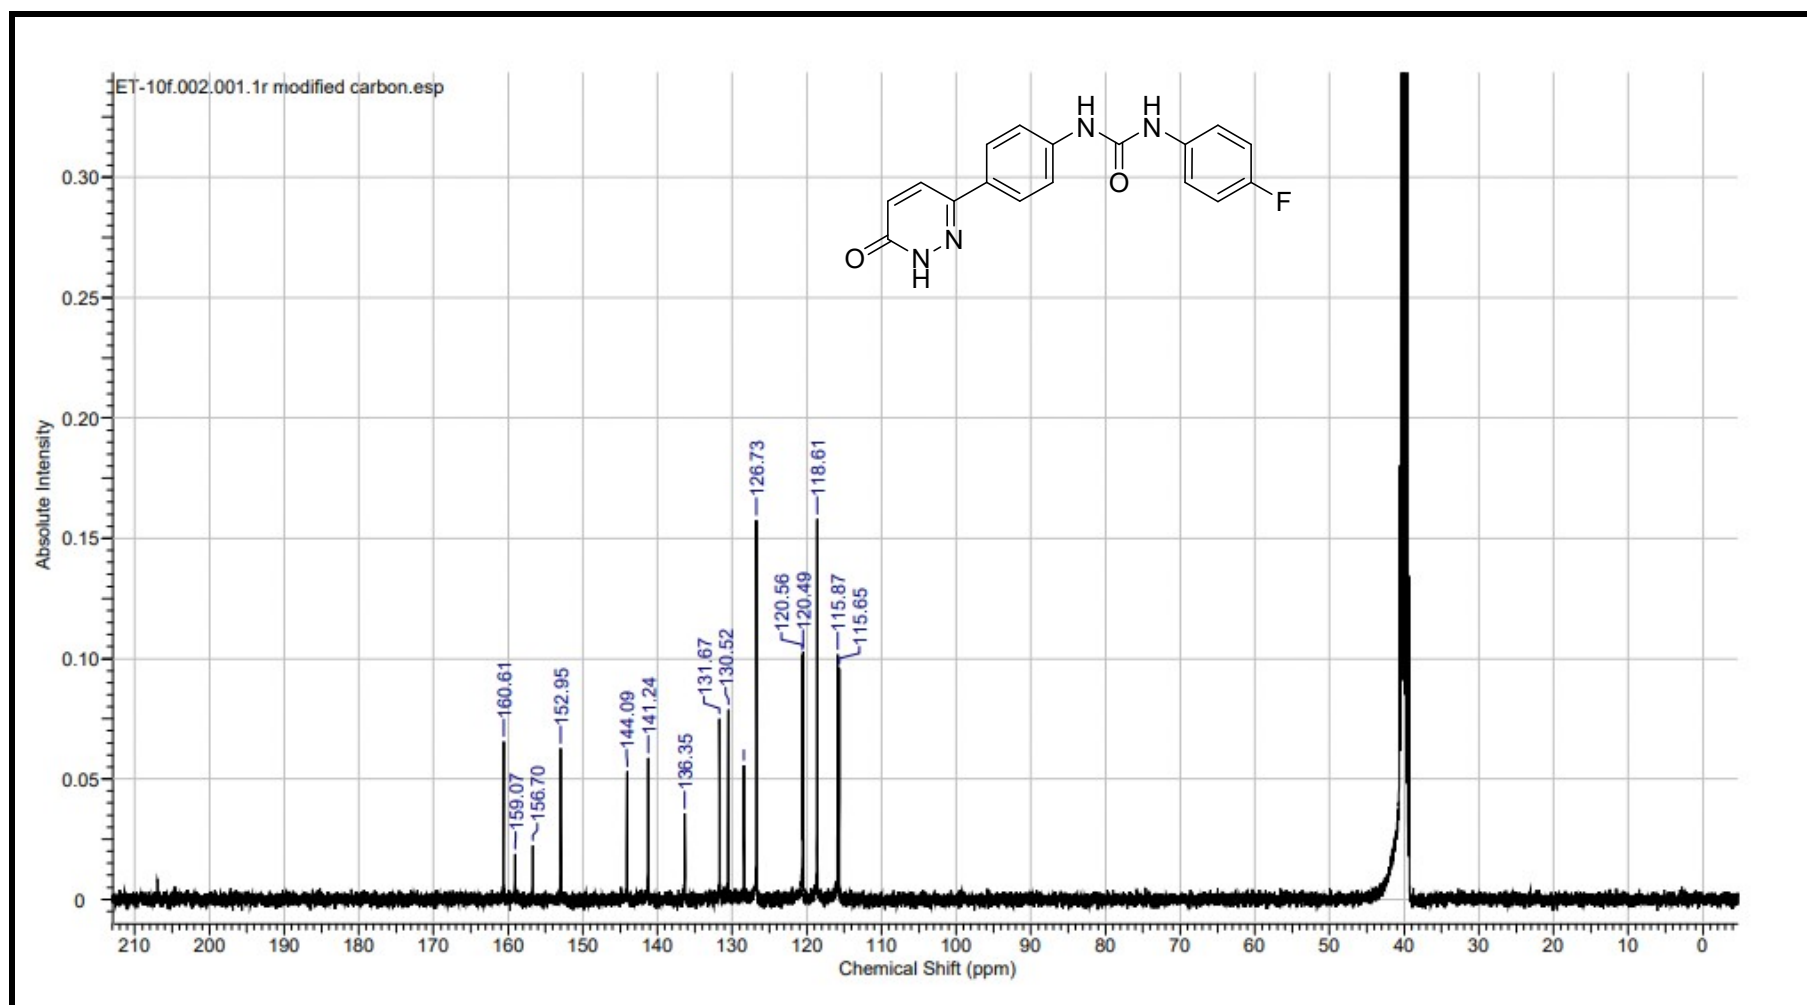

**Figure 5b.**  $^{13}\text{C}$  NMR spectrum (100 MHz) of compound 8e in  $\text{DMSO-d}_6$ .



### Single Mass Analysis

Tolerance = 3.0 PPM / DBE: min = -1.5, max = 20.0

Element prediction: Off

Number of isotope peaks used for i-FIT = 3

Monoisotopic Mass, Even Electron Ions

192 formula(e) evaluated with 1 results within limits (up to 50 best isotopic matches for each mass)

Elements Used:

C: 0-30 H: 0-30 N: 0-5 O: 0-5 F: 0-1

ET-10G/AJ

SYNAPTG2-Si#NotSet

07-Mar-2023

67590

13:24:09

0668 67 (0.149) Cm (67:84)

1: TOF MS ES+

5.02e+005

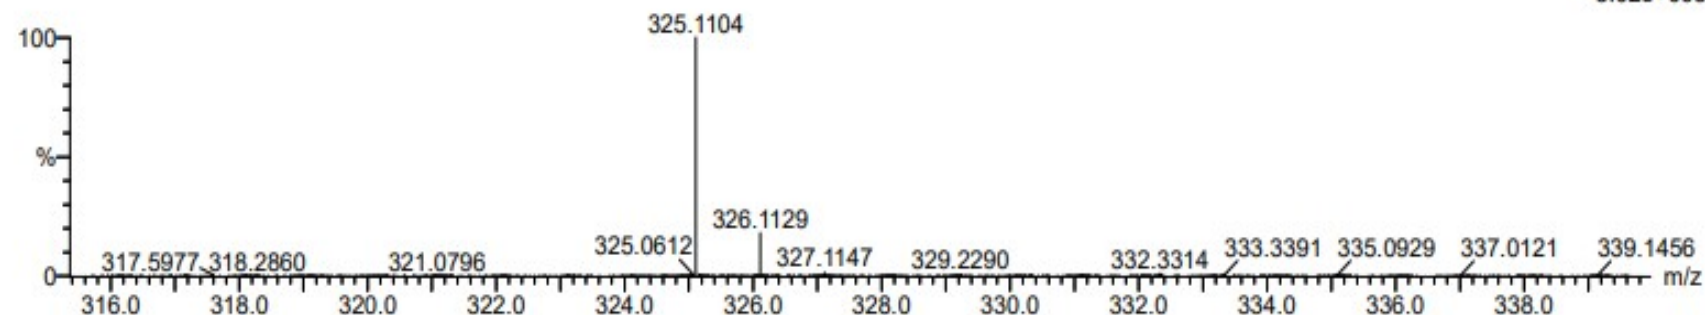

Minimum: -1.5  
Maximum: 5.0 3.0 20.0

| Mass     | Calc. Mass | mDa | PPM | DBE  | i-FIT  | Formula         |
|----------|------------|-----|-----|------|--------|-----------------|
| 325.1104 | 325.1101   | 0.3 | 0.9 | 12.5 | 1348.2 | C17 H14 N4 O2 F |

Figure 5c. HRMS of compound 8e.

## 1.6. Compound 8f

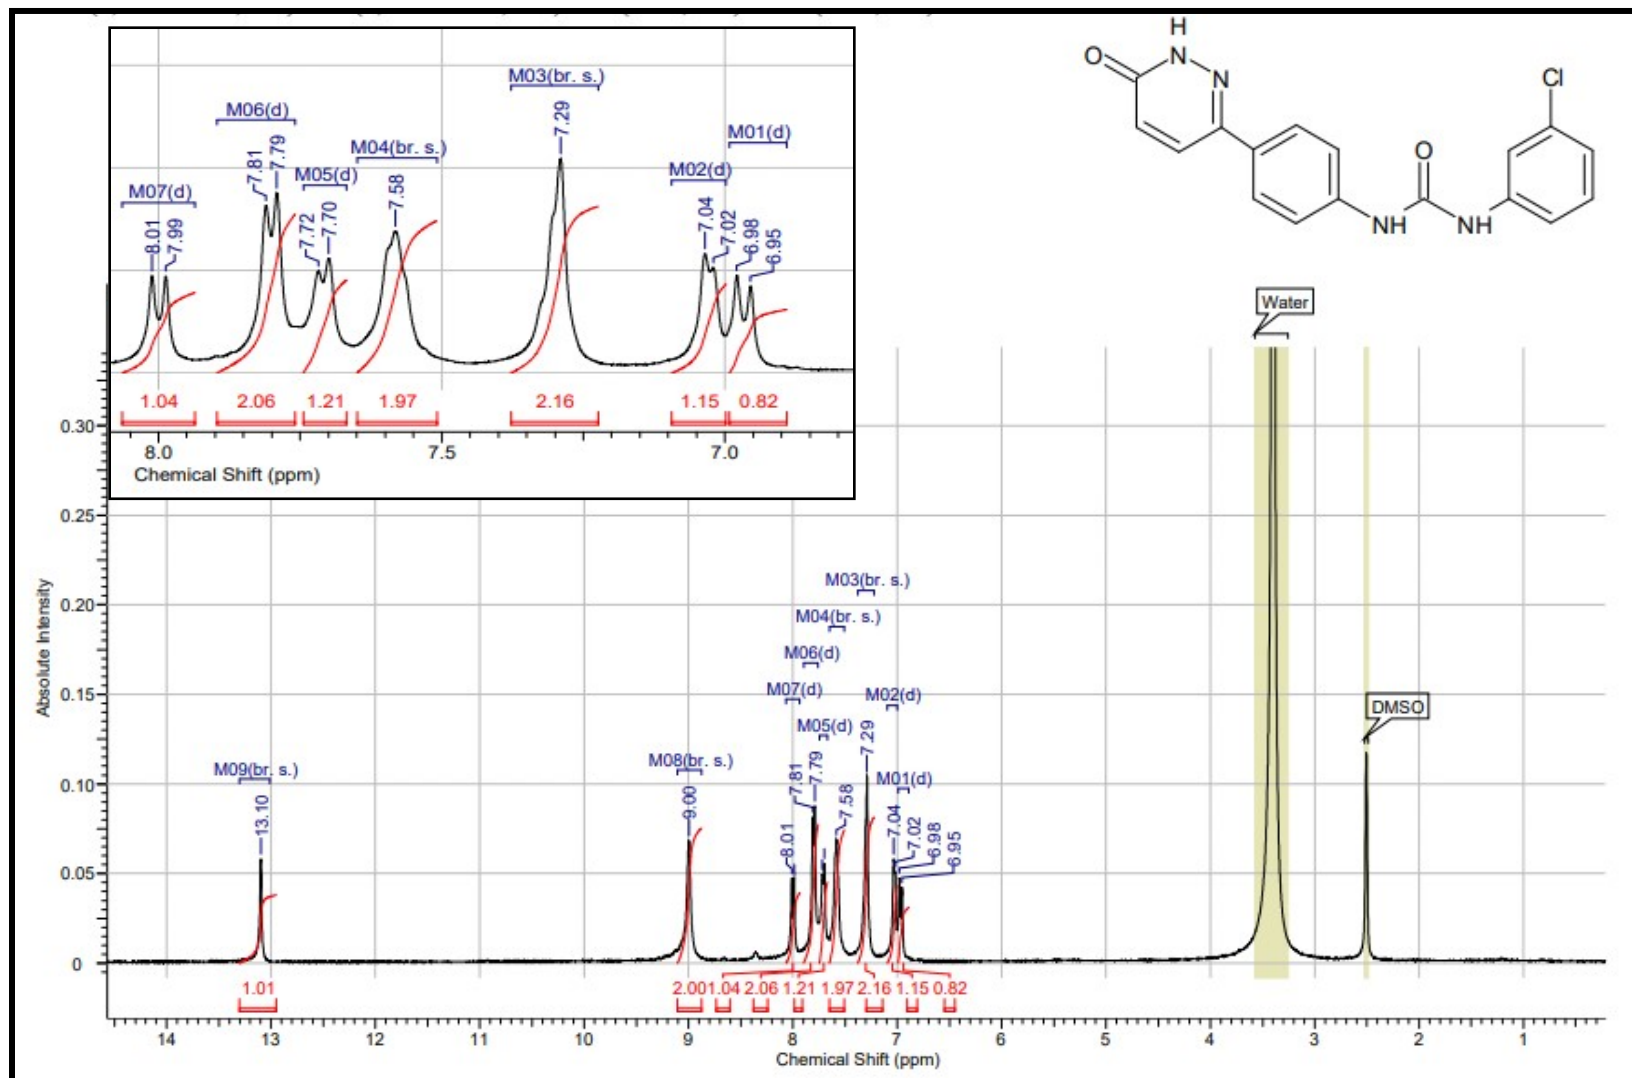

Figure 6a.  $^1\text{H}$  NMR spectrum (400 MHz) of compound 8f in  $\text{DMSO-d}_6$ .

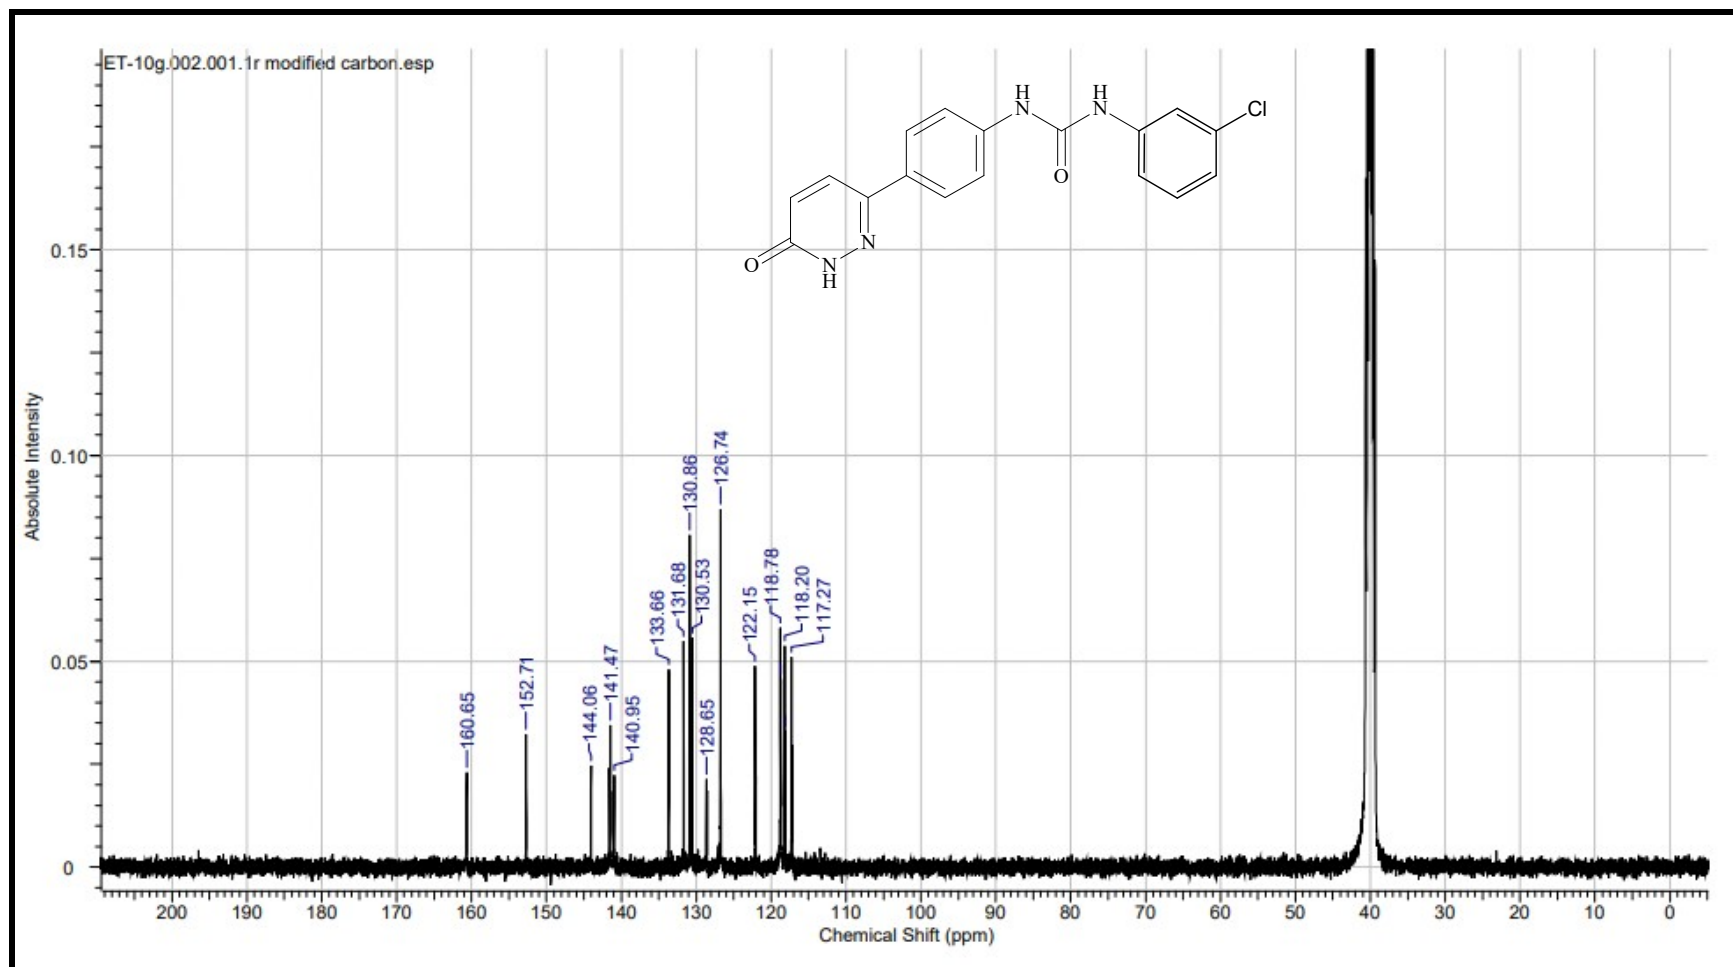

**Figure 6b.**  $^{13}\text{C}$  NMR spectrum (100 MHz) of compound 8f in  $\text{DMSO-d}_6$ .

### Single Mass Analysis

Tolerance = 3.0 PPM / DBE: min = -1.5, max = 30.0

Element prediction: Off

Number of isotope peaks used for i-FIT = 3

Monoisotopic Mass, Even Electron Ions

292 formula(e) evaluated with 1 results within limits (up to 50 best isotopic matches for each mass)

Elements Used:

C: 0-50 H: 0-50 N: 0-5 O: 0-2 35Cl: 0-1 37Cl: 0-1

ET-10k/AJ

SYNAPTG2-Si#NotSet

09-Mar-2023

67580

14:21:09

0652A 658 (1.308) Cm (653:667)

1: TOF MS ES+

6.46e+005

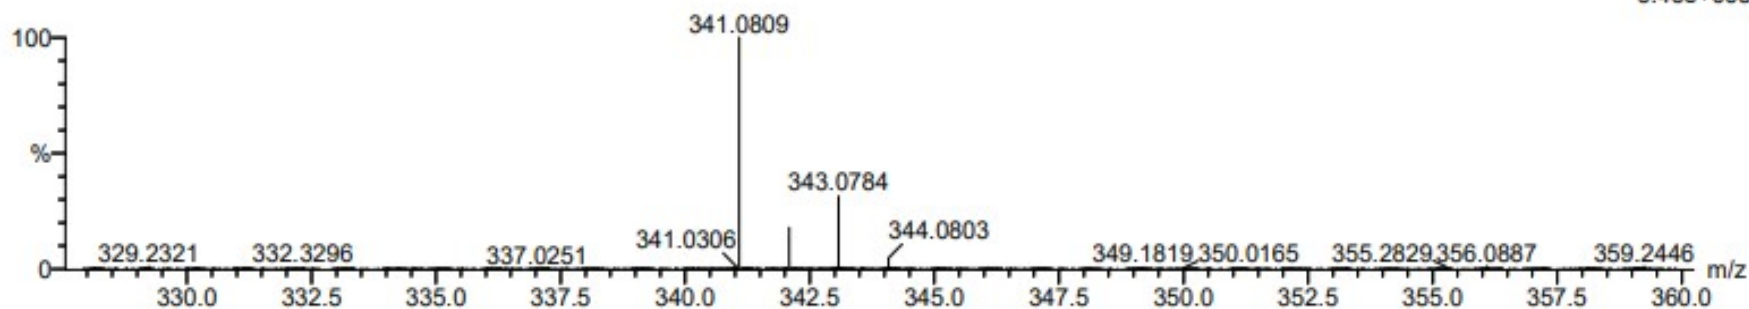

Minimum: -1.5  
Maximum: 5.0 3.0 30.0

| Mass     | Calc. Mass | mDa | PPM | DBE  | i-FIT  | Formula            |
|----------|------------|-----|-----|------|--------|--------------------|
| 341.0809 | 341.0805   | 0.4 | 1.2 | 12.5 | 1797.8 | C17 H14 N4 O2 35Cl |

Figure 6c. HRMS of compound 8f.

## 1.7. Compound 8g

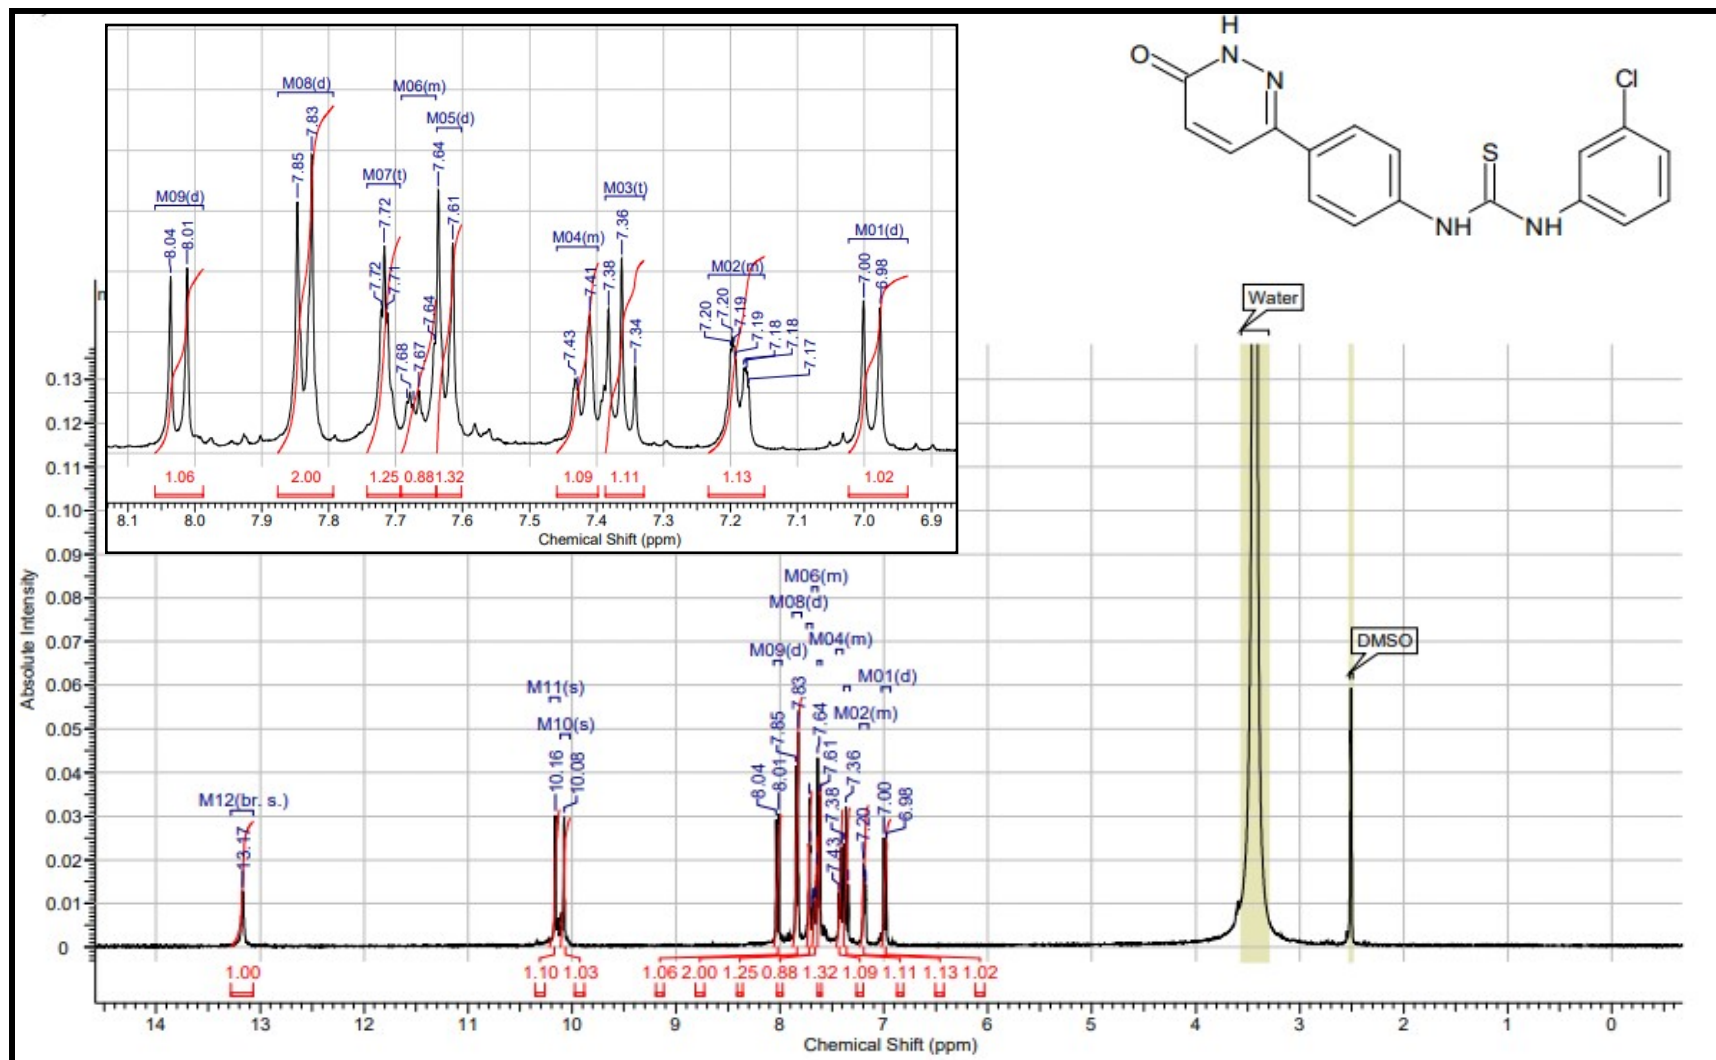

Figure 7a.  $^1\text{H}$  NMR spectrum (400 MHz) of compound 8g in  $\text{DMSO-d}_6$ .

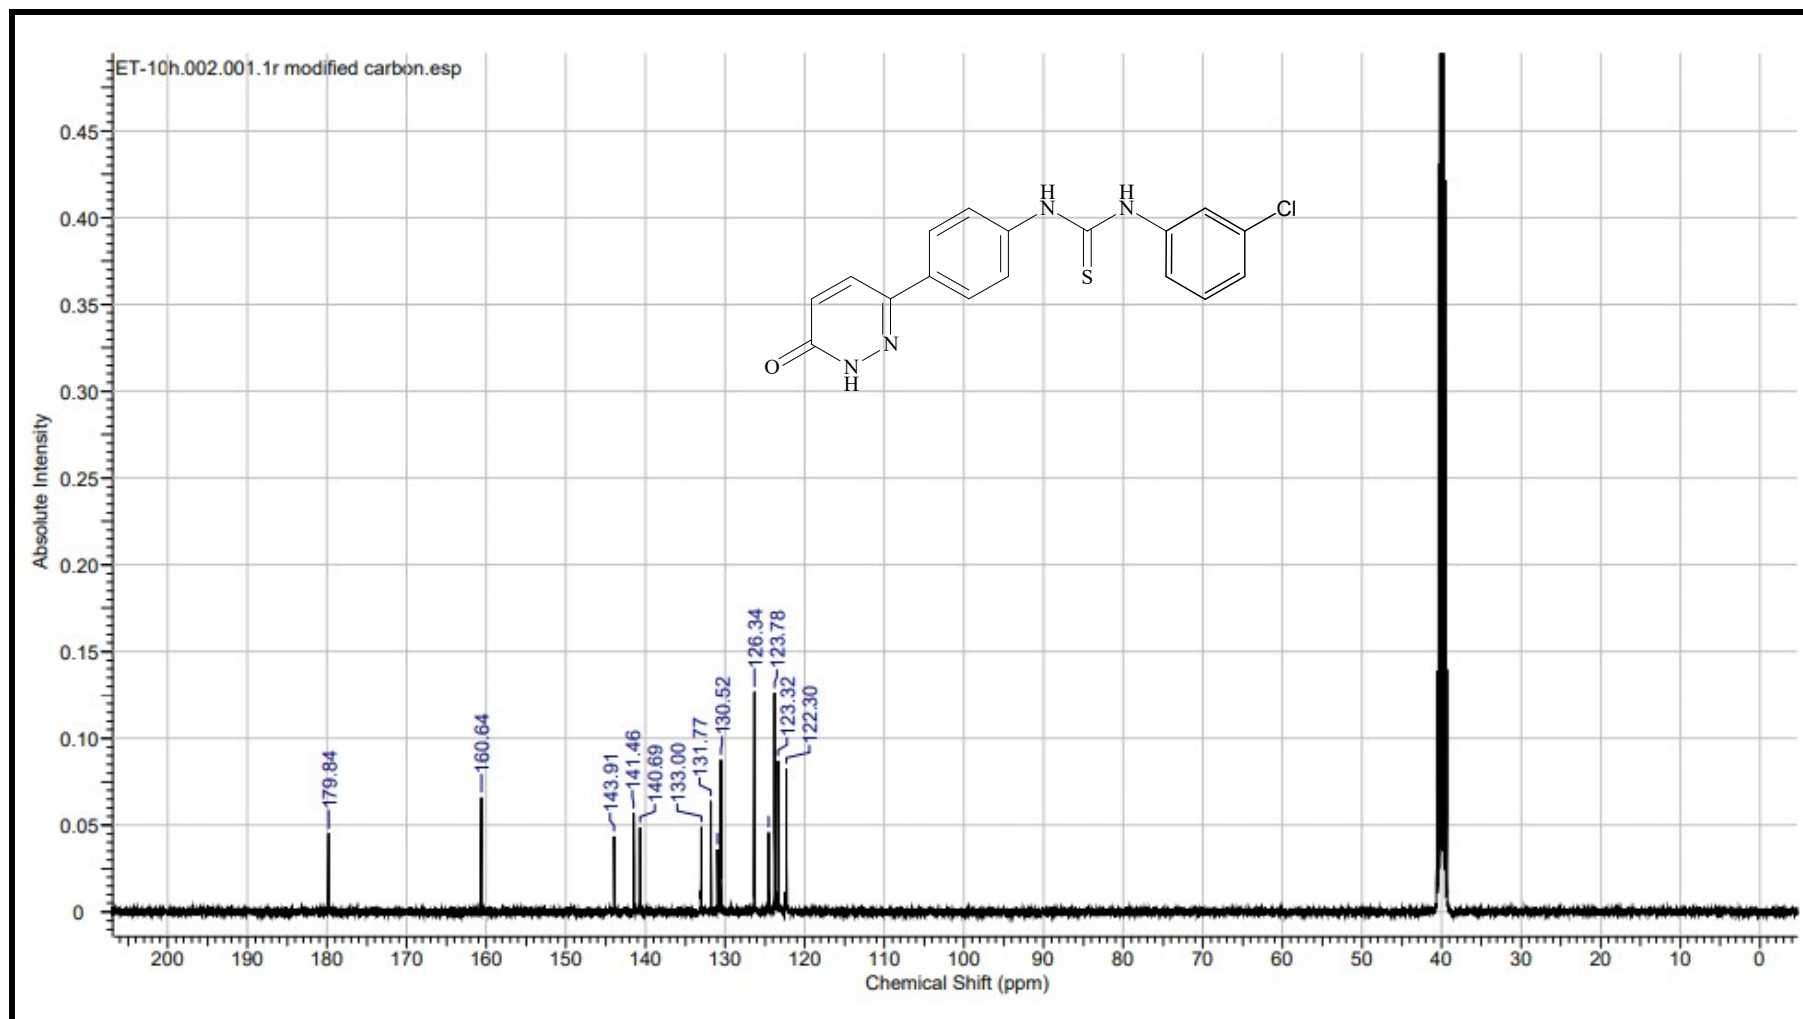

**Figure 7b.**  $^{13}\text{C}$  NMR spectrum (100 MHz) of compound 8g in  $\text{DMSO-d}_6$ .

### Single Mass Analysis

Tolerance = 3.0 PPM / DBE: min = -1.5, max = 20.0

Element prediction: Off

Number of isotope peaks used for i-FIT = 3

Monoisotopic Mass, Odd and Even Electron Ions

146 formula(e) evaluated with 1 results within limits (up to 50 best isotopic matches for each mass)

Elements Used:

C: 0-30 H: 0-20 N: 0-4 O: 0-1 S: 0-1 35Cl: 0-1 37Cl: 0-1

ET-10I/AJ

SYNAPTG2-Si#NotSet

07-Mar-2023

67585

12:25:31

0663 517 (1.034) Cm (469:548-98:132)

1: TOF MS ES+

2.64e+006

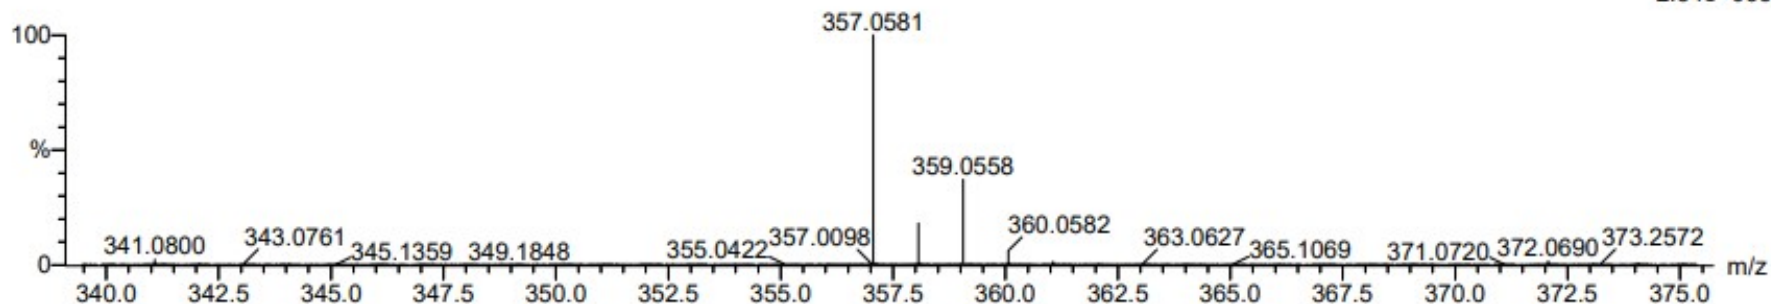

Minimum: -1.5  
Maximum: 5.0 3.0 20.0

| Mass     | Calc. Mass | mDa | PPM | DBE  | i-FIT  | Formula             |
|----------|------------|-----|-----|------|--------|---------------------|
| 357.0581 | 357.0577   | 0.4 | 1.1 | 12.5 | 2715.5 | C17 H14 N4 O S 35Cl |

Figure 7c. HRMS of compound 8g.

## 1.8. Compound 8h

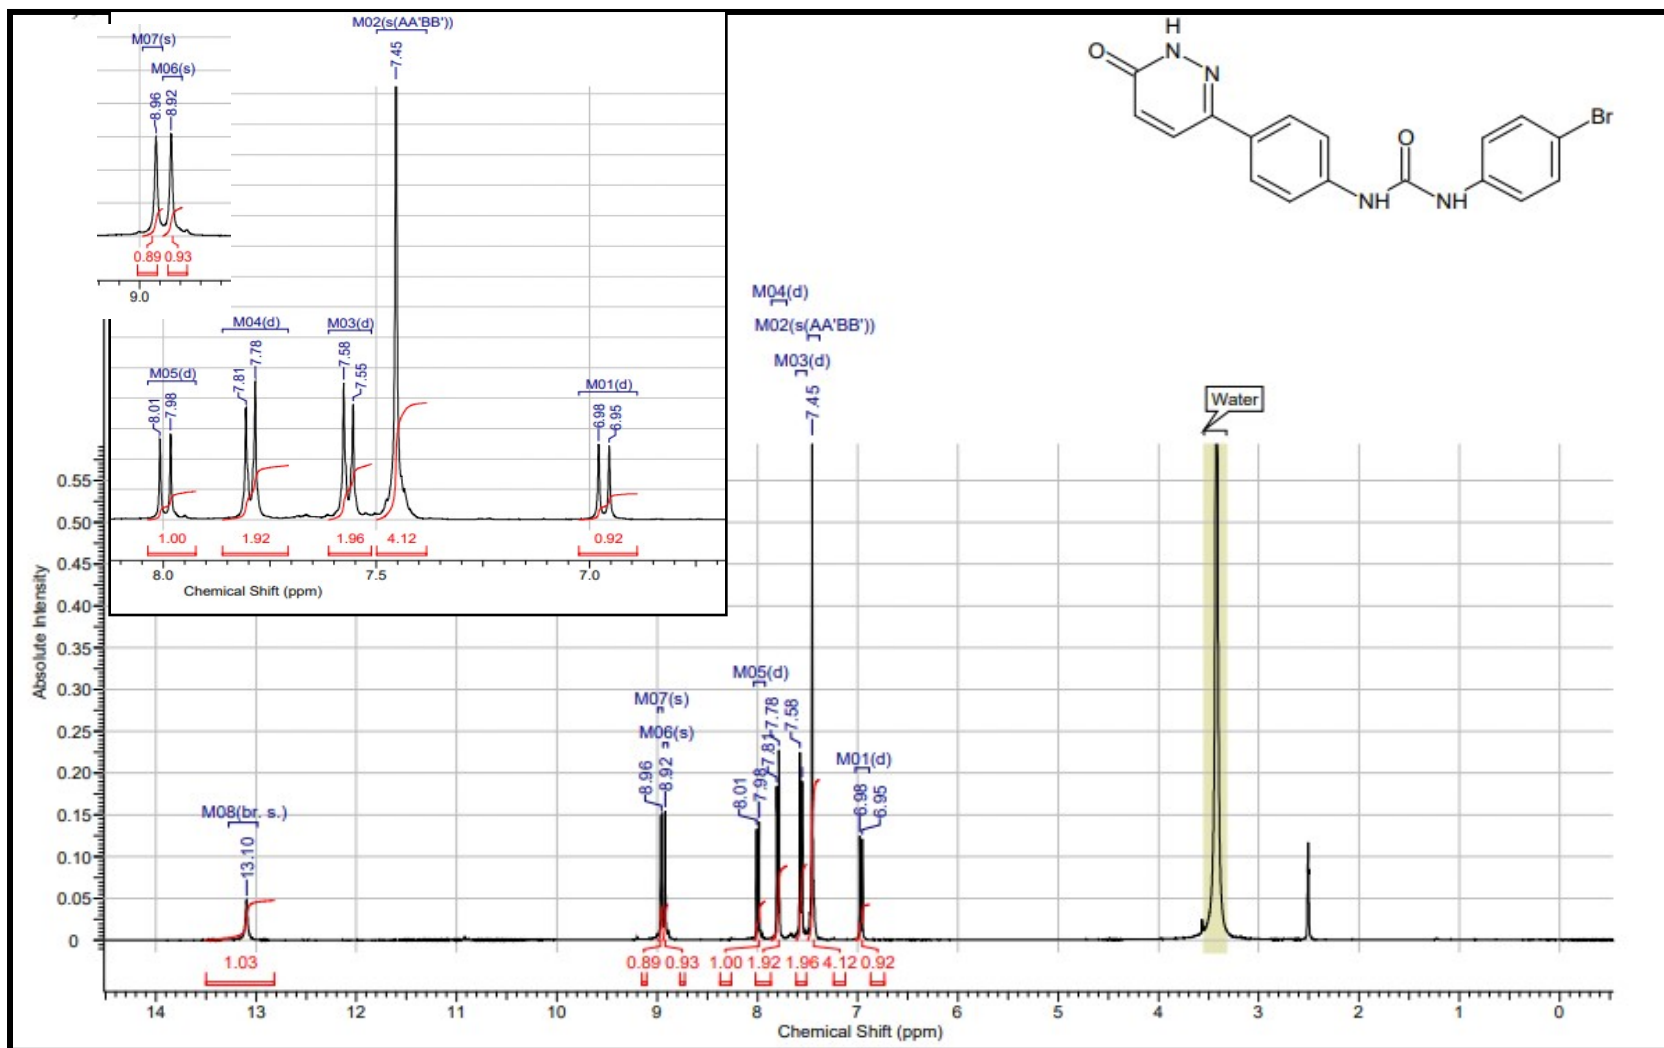

Figure 8a.  $^1\text{H}$  NMR spectrum (400 MHz) of compound 8h in  $\text{DMSO-d}_6$ .



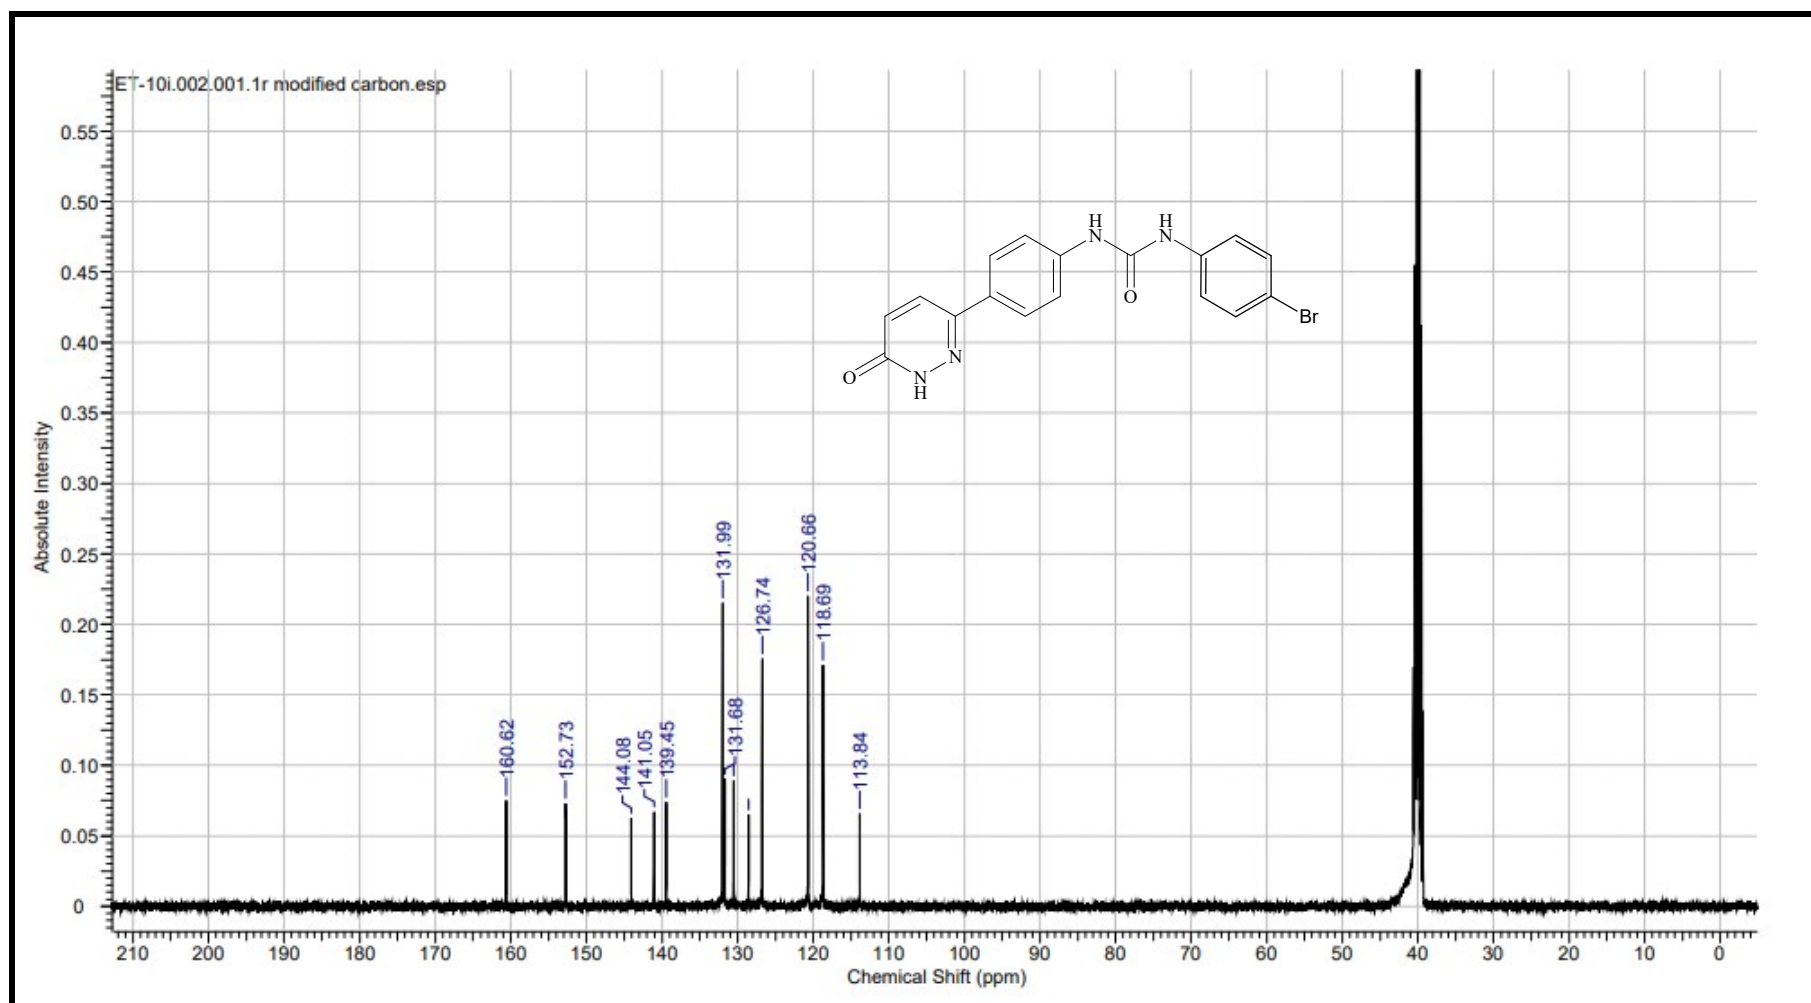

**Figure 8b.**  $^{13}\text{C}$  NMR spectrum (100 MHz) of compound 8h in  $\text{DMSO-d}_6$ .

### Single Mass Analysis

Tolerance = 3.0 PPM / DBE: min = -1.5, max = 15.0

Element prediction: Off

Number of isotope peaks used for i-FIT = 3

Monoisotopic Mass, Even Electron Ions

176 formula(e) evaluated with 1 results within limits (up to 50 best isotopic matches for each mass)

Elements Used:

C: 0-50 H: 0-20 N: 0-5 O: 0-3 79Br: 0-1 81Br: 0-1

ET-10m/AJ

67578

0649 670 (1.331)

1: TOF MS ES+

SYNAPT G2-Si#NotSet

06-Mar-2023

15:40:18

4.52e+006

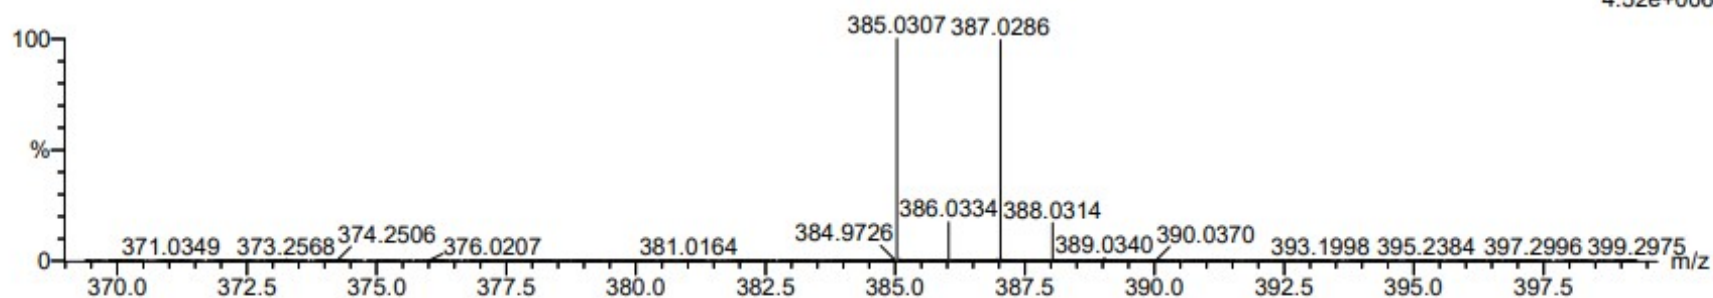

Minimum: -1.5  
Maximum: 5.0 3.0 15.0

| Mass     | Calc. Mass | mDa | PPM | DBE  | i-FIT  | Formula            |
|----------|------------|-----|-----|------|--------|--------------------|
| 385.0307 | 385.0300   | 0.7 | 1.8 | 12.5 | 3291.8 | C17 H14 N4 O2 79Br |

Figure 8c. HRMS of compound 8h.

## 1.9. Compound 8i

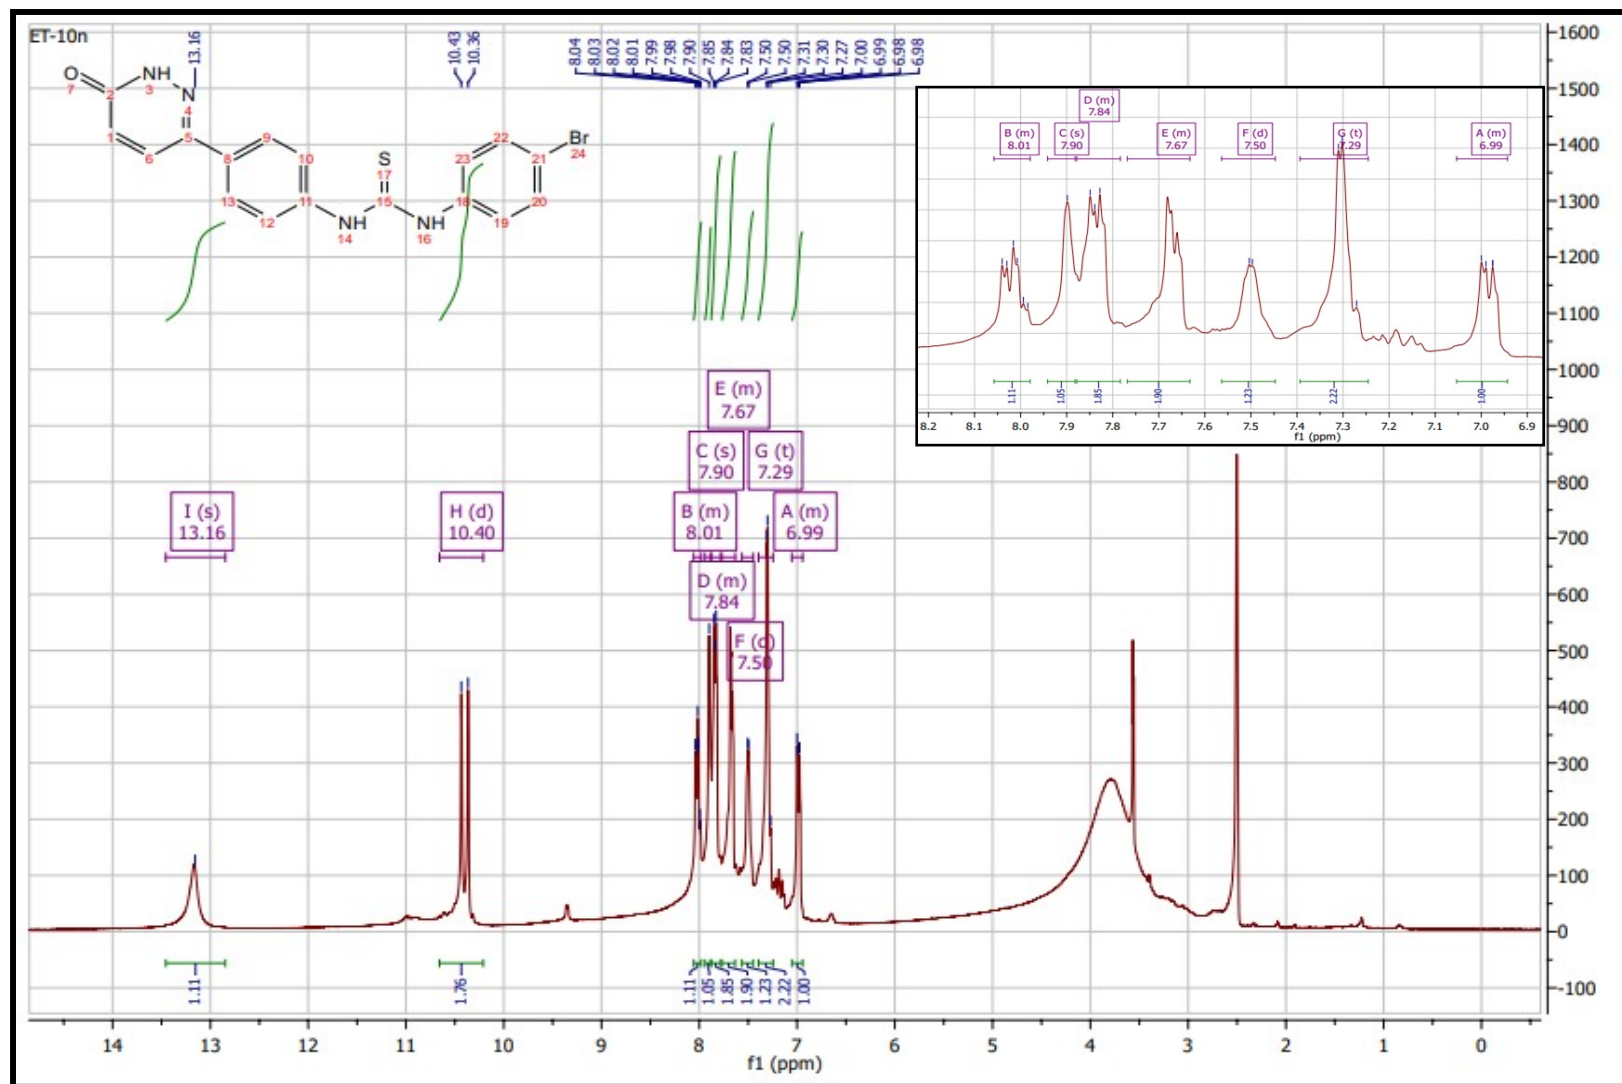

Figure 9a. <sup>1</sup>H NMR spectrum (400 MHz) of compound 8i in DMSO-d<sub>6</sub>.

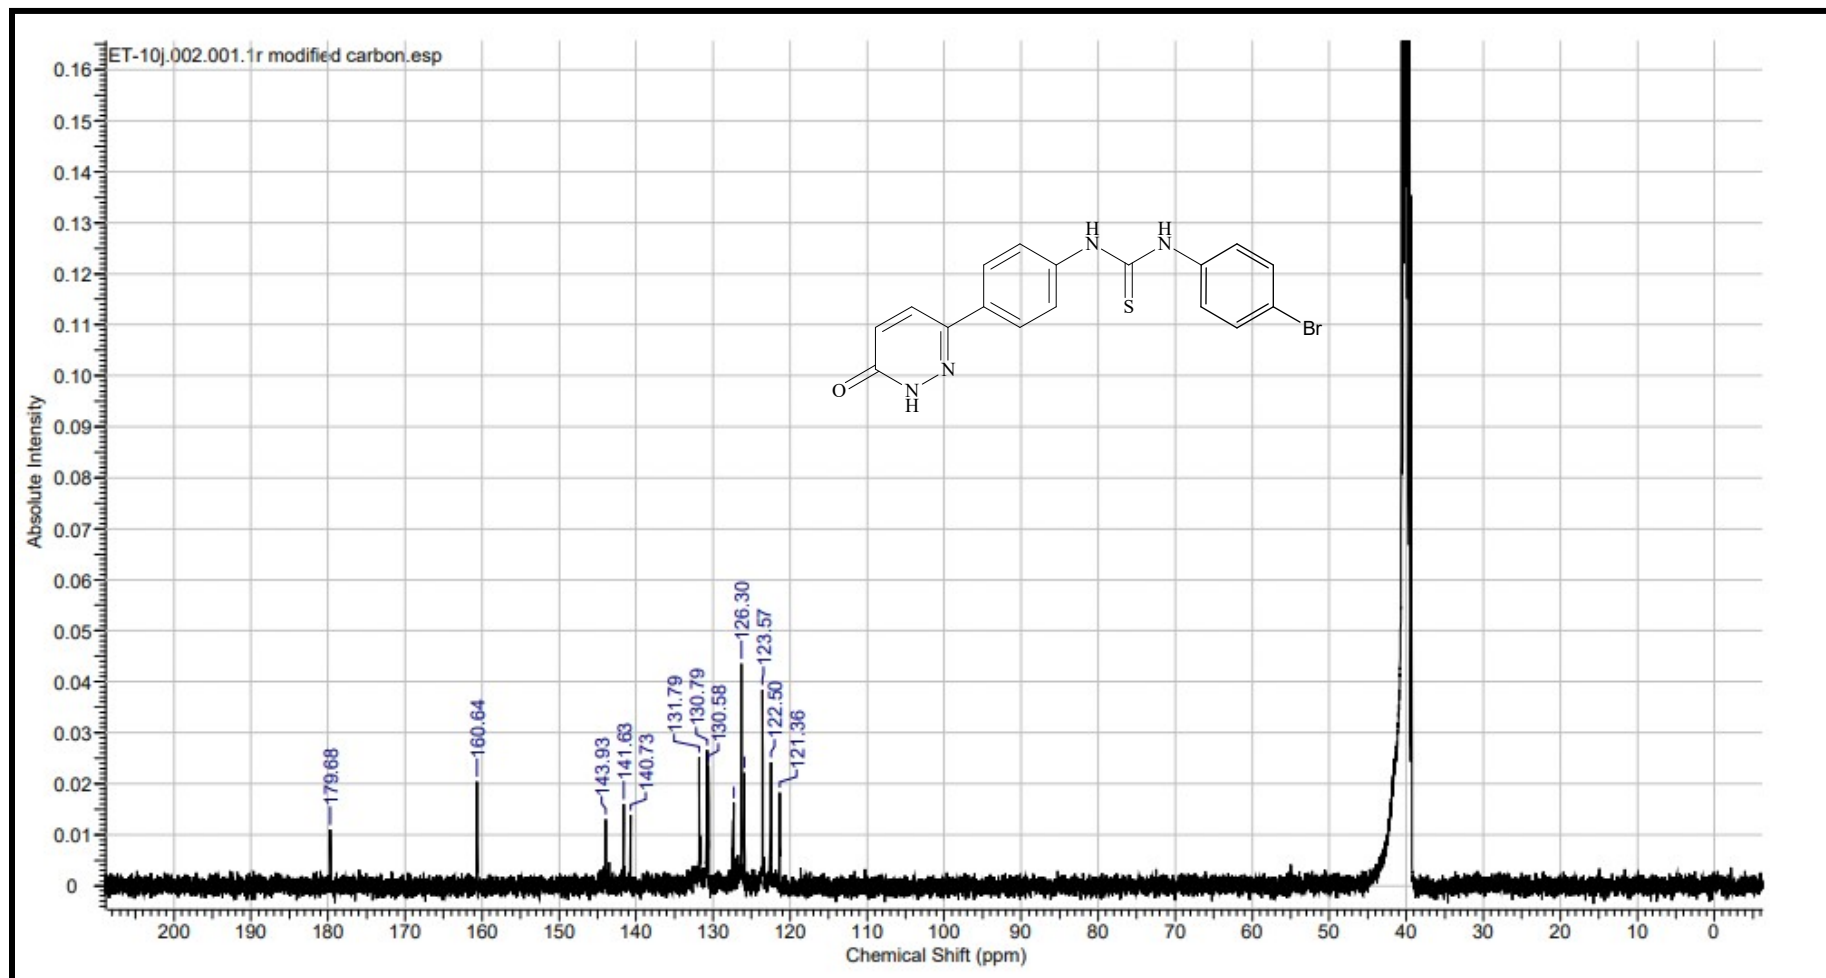

**Figure 9b.  $^{13}\text{C}$  NMR spectrum (100 MHz) of compound 8i in  $\text{DMSO-d}_6$ .**

### Single Mass Analysis

Tolerance = 3.0 PPM / DBE: min = -1.5, max = 25.0

Element prediction: Off

Number of isotope peaks used for i-FIT = 3

Monoisotopic Mass, Even Electron Ions

539 formula(e) evaluated with 1 results within limits (up to 50 best isotopic matches for each mass)

Elements Used:

C: 0-30 H: 0-30 N: 0-5 O: 0-2 S: 0-1 79Br: 0-2 81Br: 0-1

ET-10n/AJ

SYNAPTG2-Si#NotSet

14-Mar-2023

67591

15:23:46

0669A 521 (1.045) Cm (411:820)

1: TOF MS ES+

4.31e+007

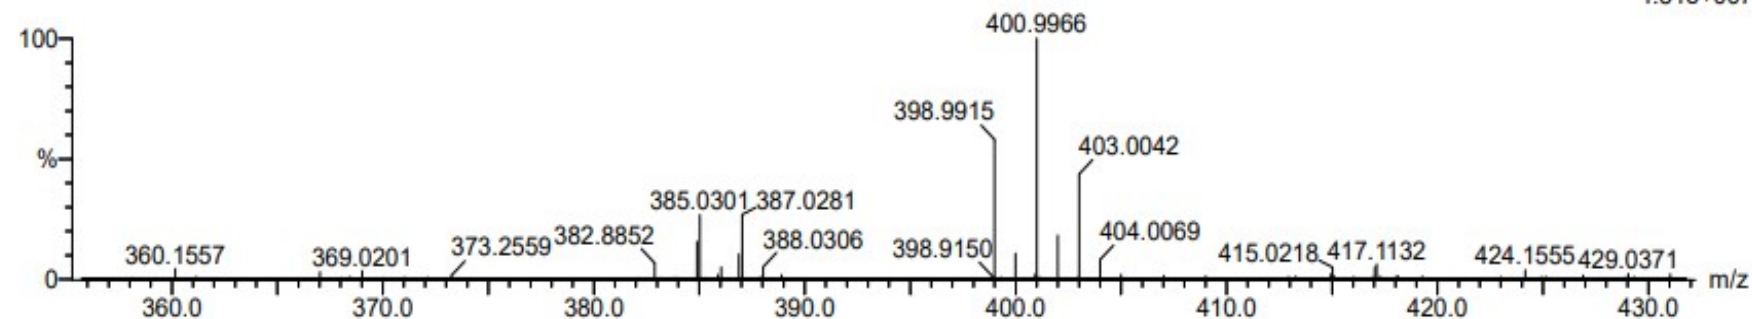

Minimum: -1.5  
Maximum: 5.0 3.0 25.0

| Mass     | Calc. Mass | mDa | PPM | DBE  | i-FIT  | Formula            |
|----------|------------|-----|-----|------|--------|--------------------|
| 385.0301 | 385.0300   | 0.1 | 0.3 | 12.5 | 4631.4 | C17 H14 N4 O2 79Br |

Figure 9c. HRMS of compound 8i.

## 1.10. Compound 8j

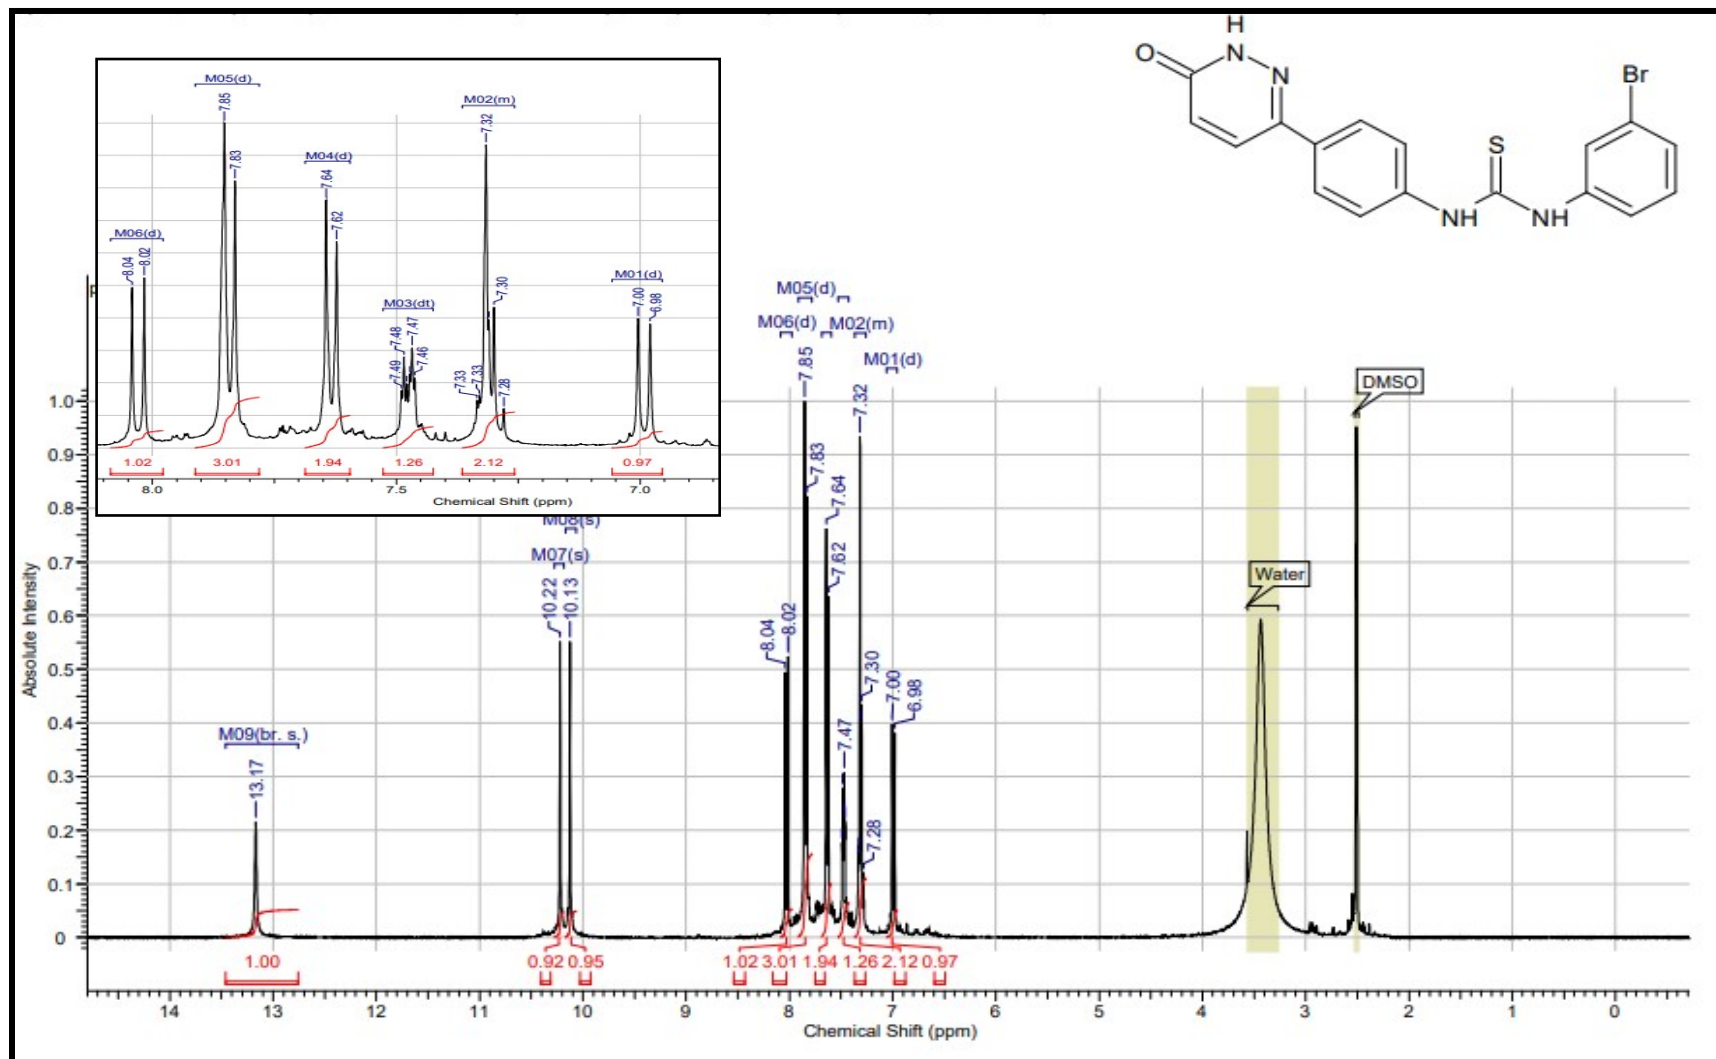

Figure 10a. <sup>1</sup>H NMR spectrum (400 MHz) of compound 8j in DMSO-d<sub>6</sub>.

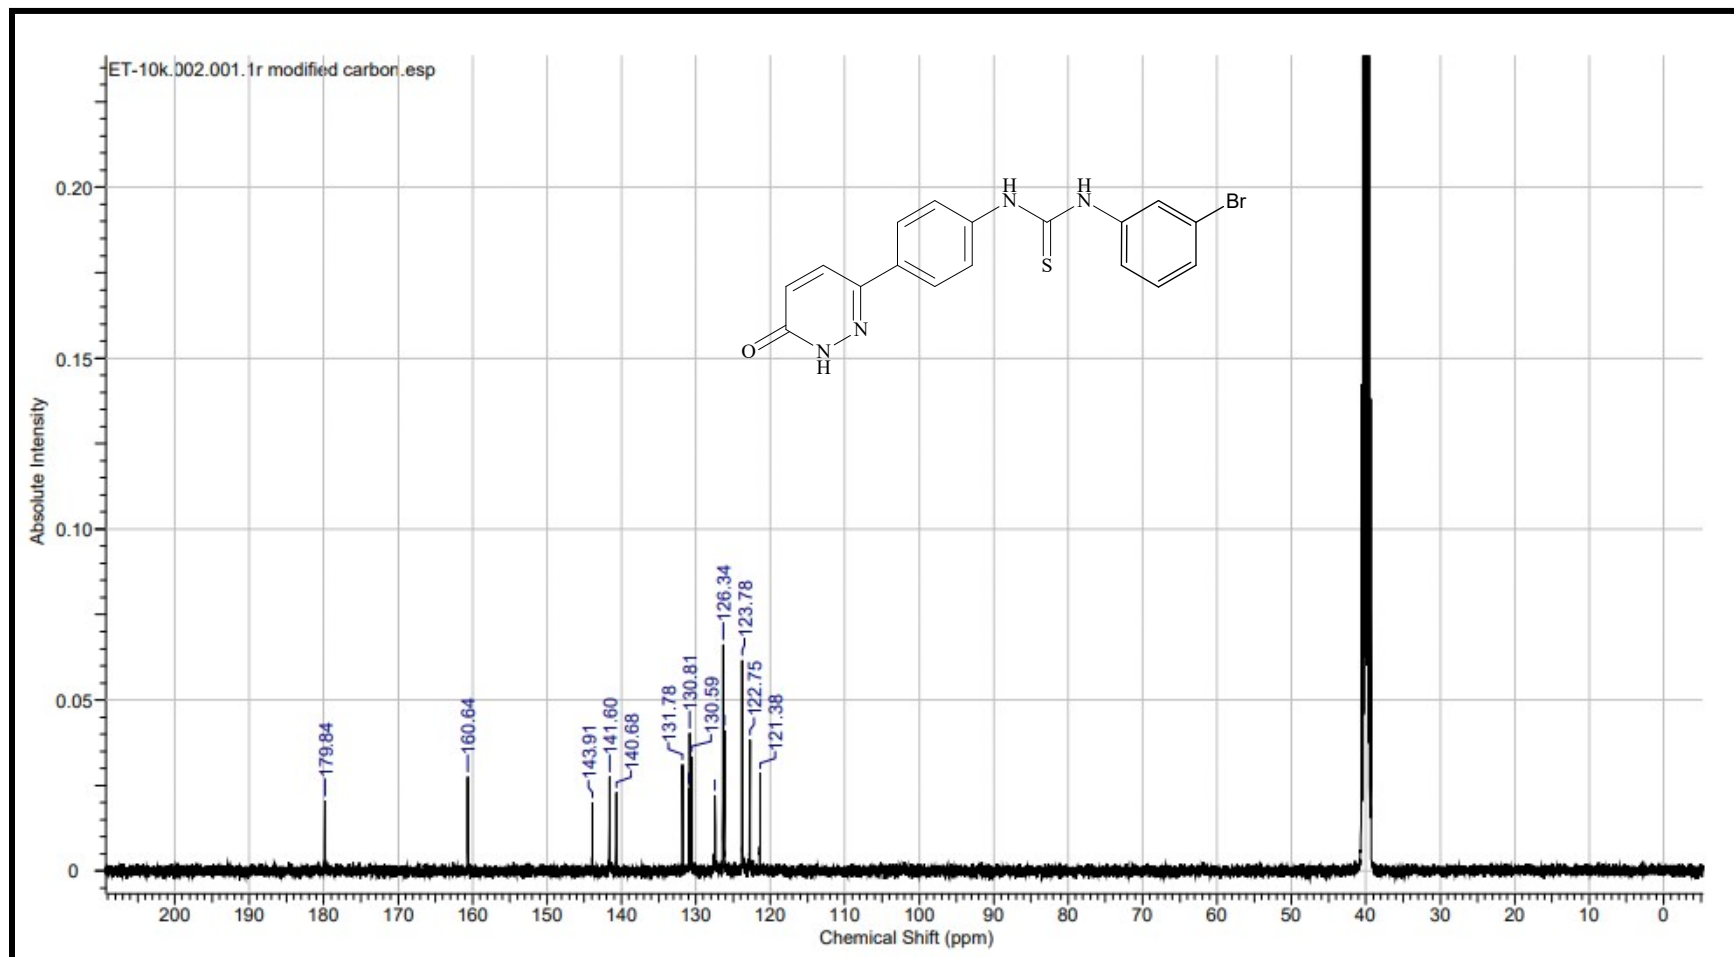

**Figure 10b.  $^{13}\text{C}$  NMR spectrum (100 MHz) of compound 8j in  $\text{DMSO-d}_6$ .**

### Single Mass Analysis

Tolerance = 3.0 PPM / DBE: min = -1.5, max = 20.0

Element prediction: Off

Number of isotope peaks used for i-FIT = 3

Monoisotopic Mass, Even Electron Ions

304 formula(e) evaluated with 1 results within limits (up to 50 best isotopic matches for each mass)

Elements Used:

C: 0-30 H: 0-24 N: 0-5 O: 0-2 S: 0-1 79Br: 0-1 81Br: 0-1

ET-100/AJ

SYNAPT-G2-Si#NotSet

07-Mar-2023

67592

13:31:27

0670 517 (1.035) Cm (517:591)

1: TOF MS ES+

2.76e+006

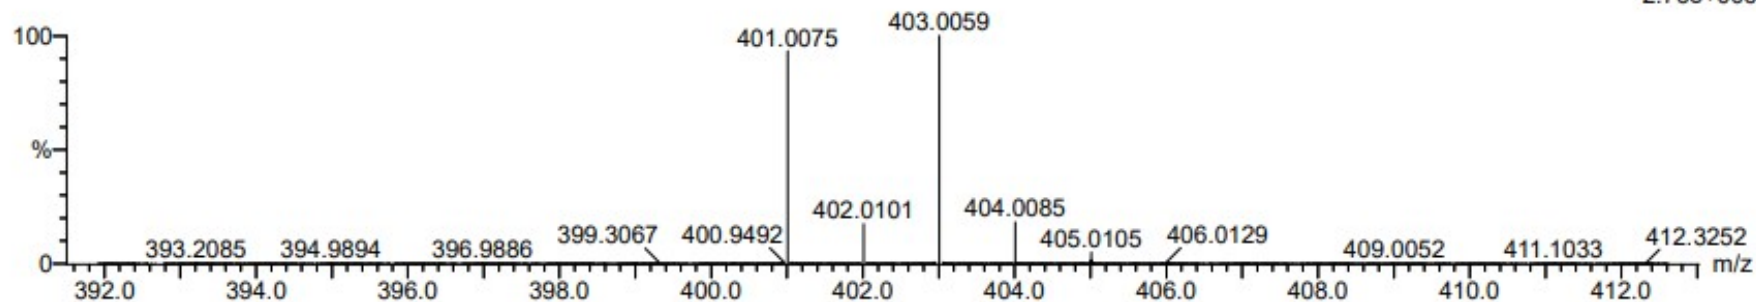

Minimum: -1.5  
Maximum: 5.0 3.0 20.0

| Mass     | Calc. Mass | mDa | PPM | DBE  | i-FIT  | Formula             |
|----------|------------|-----|-----|------|--------|---------------------|
| 401.0075 | 401.0072   | 0.3 | 0.7 | 12.5 | 3033.7 | C17 H14 N4 O S 79Br |

Figure 10c. HRMS of compound 8j.



## 2. Spectral data of series II

### 2.1. Compound 9a

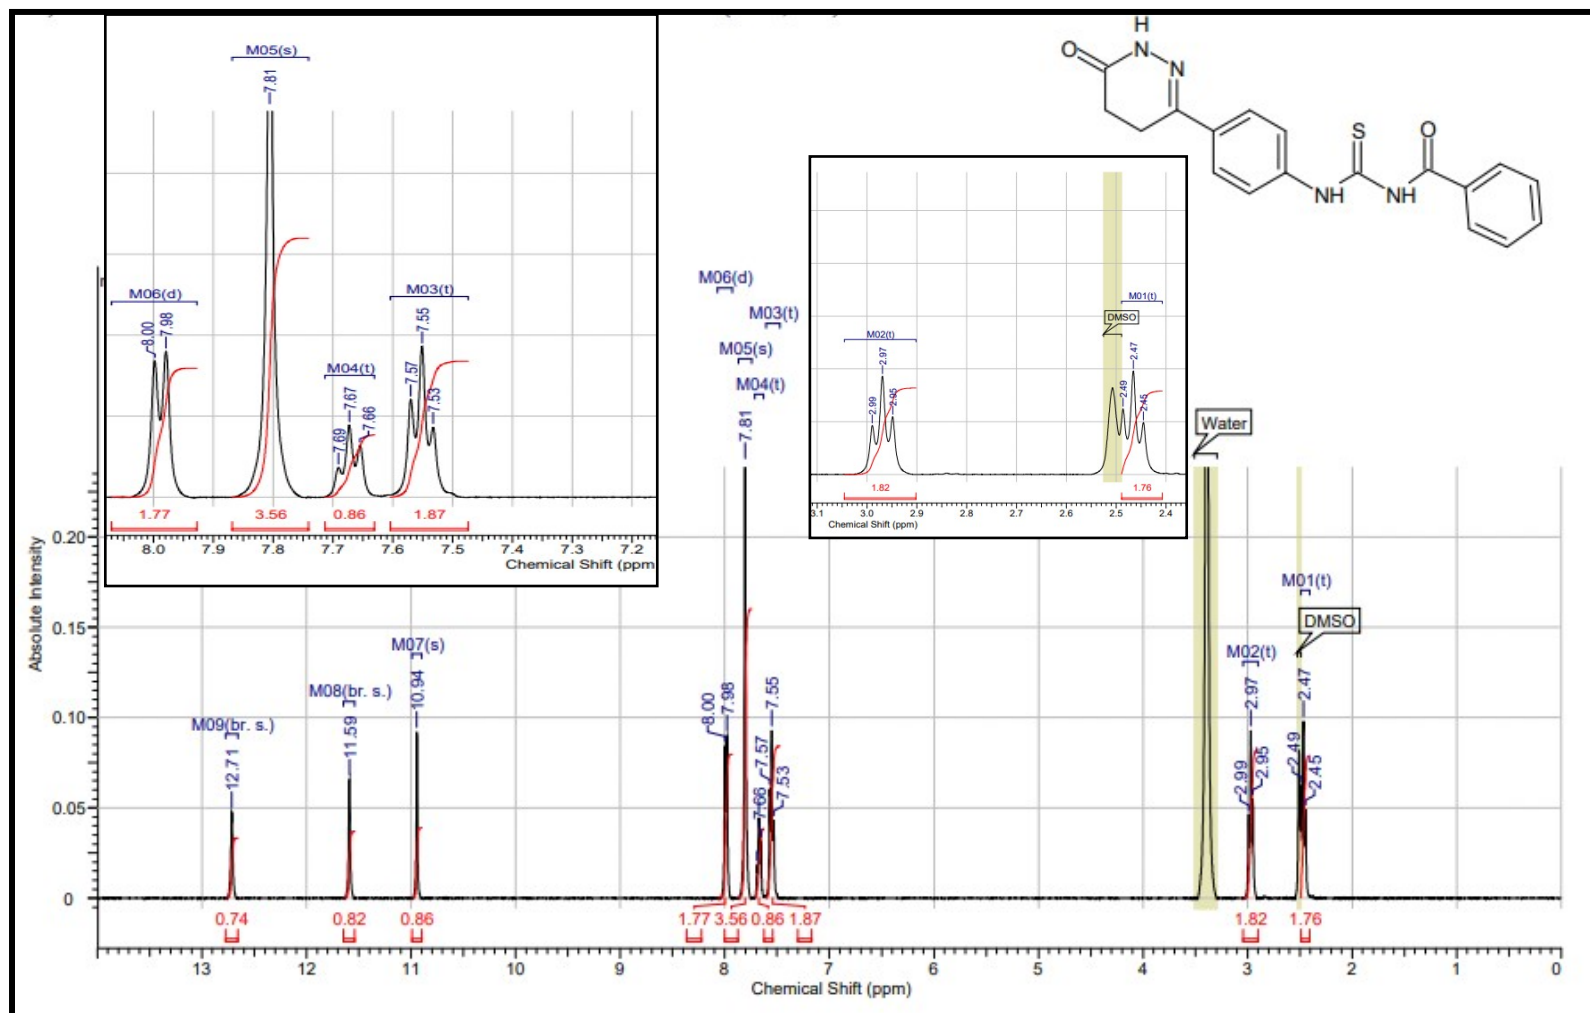

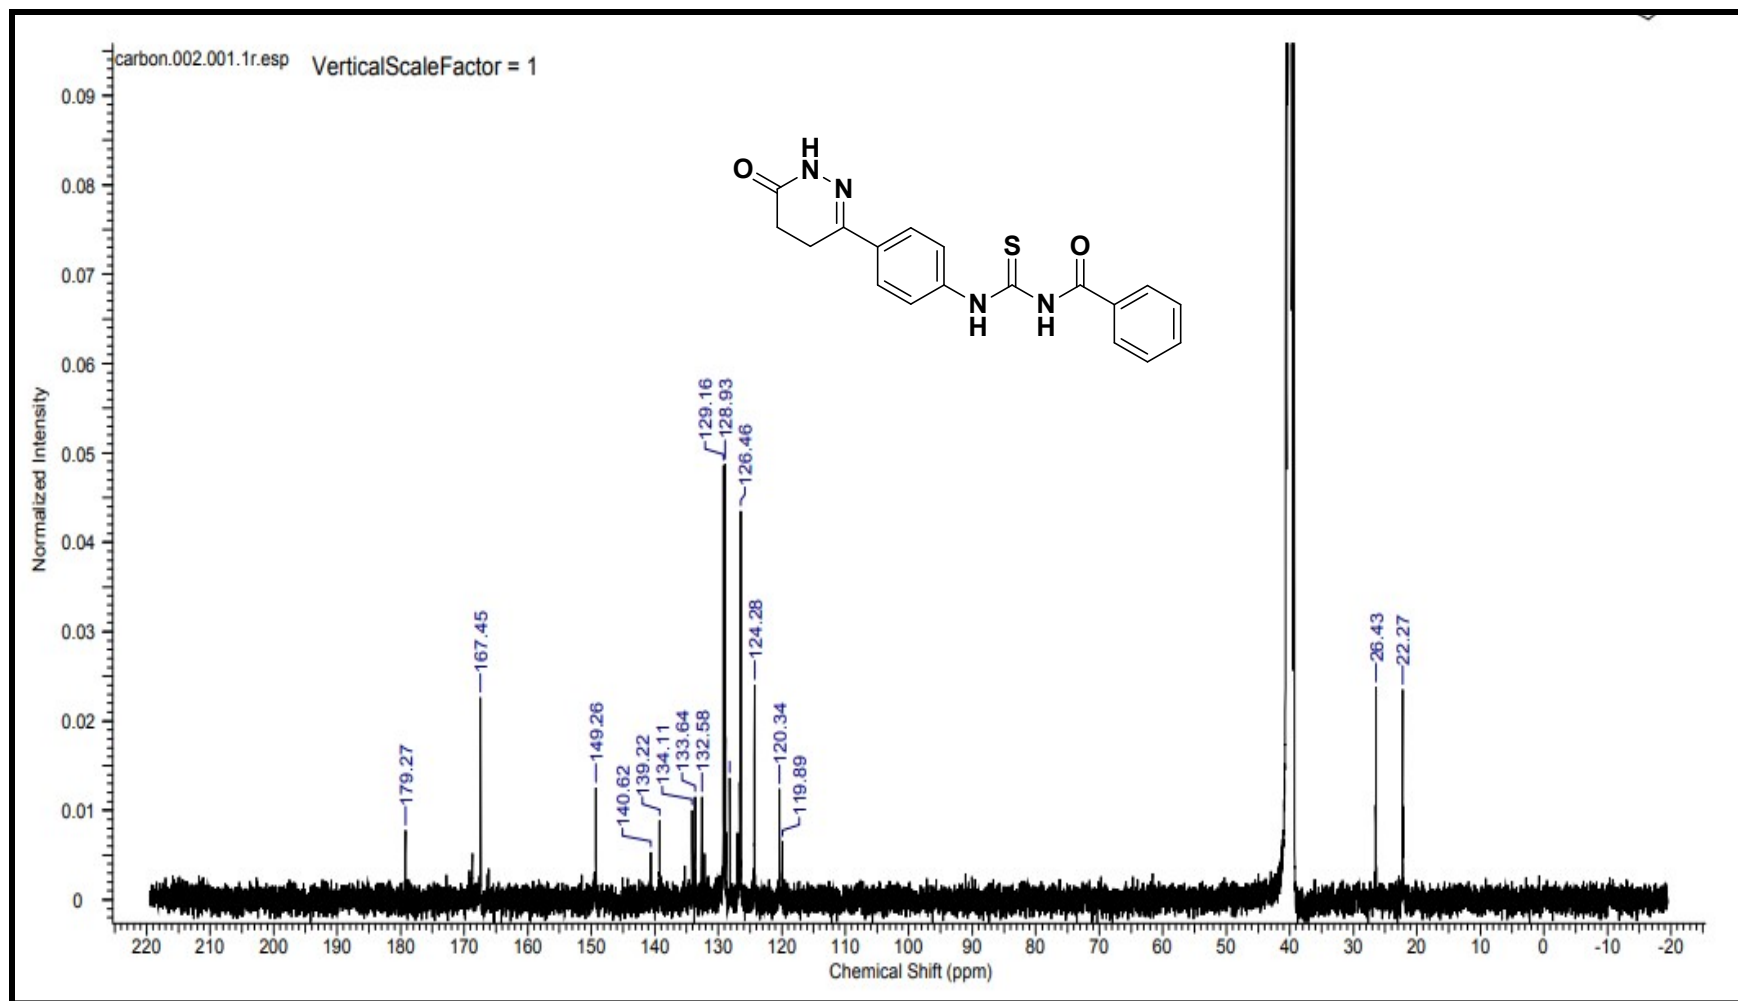

**Figure 11b.**  $^{13}\text{C}$  NMR spectrum (100 MHz) of compound 9a in  $\text{DMSO-d}_6$ .

### Single Mass Analysis

Tolerance = 3.0 PPM / DBE: min = -1.5, max = 13.0

Element prediction: Off

Number of isotope peaks used for i-FIT = 3

Monoisotopic Mass, Even Electron Ions

110 formula(e) evaluated with 1 results within limits (up to 50 closest results for each mass)

Elements Used:

C: 0-30 H: 0-20 N: 0-5 O: 0-4 S: 0-1

ET-4a/AJ

67563

0566 129 (0.272) Cm (80:482)

1: TOF MS ES+

SYNAPTG2-Si#NotSet

27-Feb-2023

11:59:58

4.09e+005

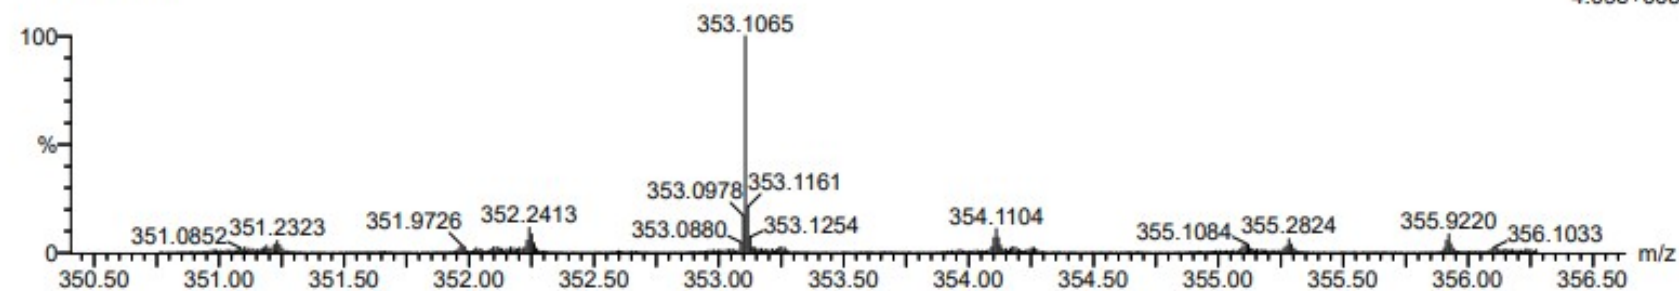

Minimum: -1.5  
Maximum: 5.0 3.0 13.0

| Mass     | Calc. Mass | mDa  | PPM  | DBE  | i-FIT  | Formula         |
|----------|------------|------|------|------|--------|-----------------|
| 353.1065 | 353.1072   | -0.7 | -2.0 | 12.5 | 3879.9 | C18 H17 N4 O2 S |

Figure 11c. HRMS of compound 9a.

## 2.2. Compound 9b

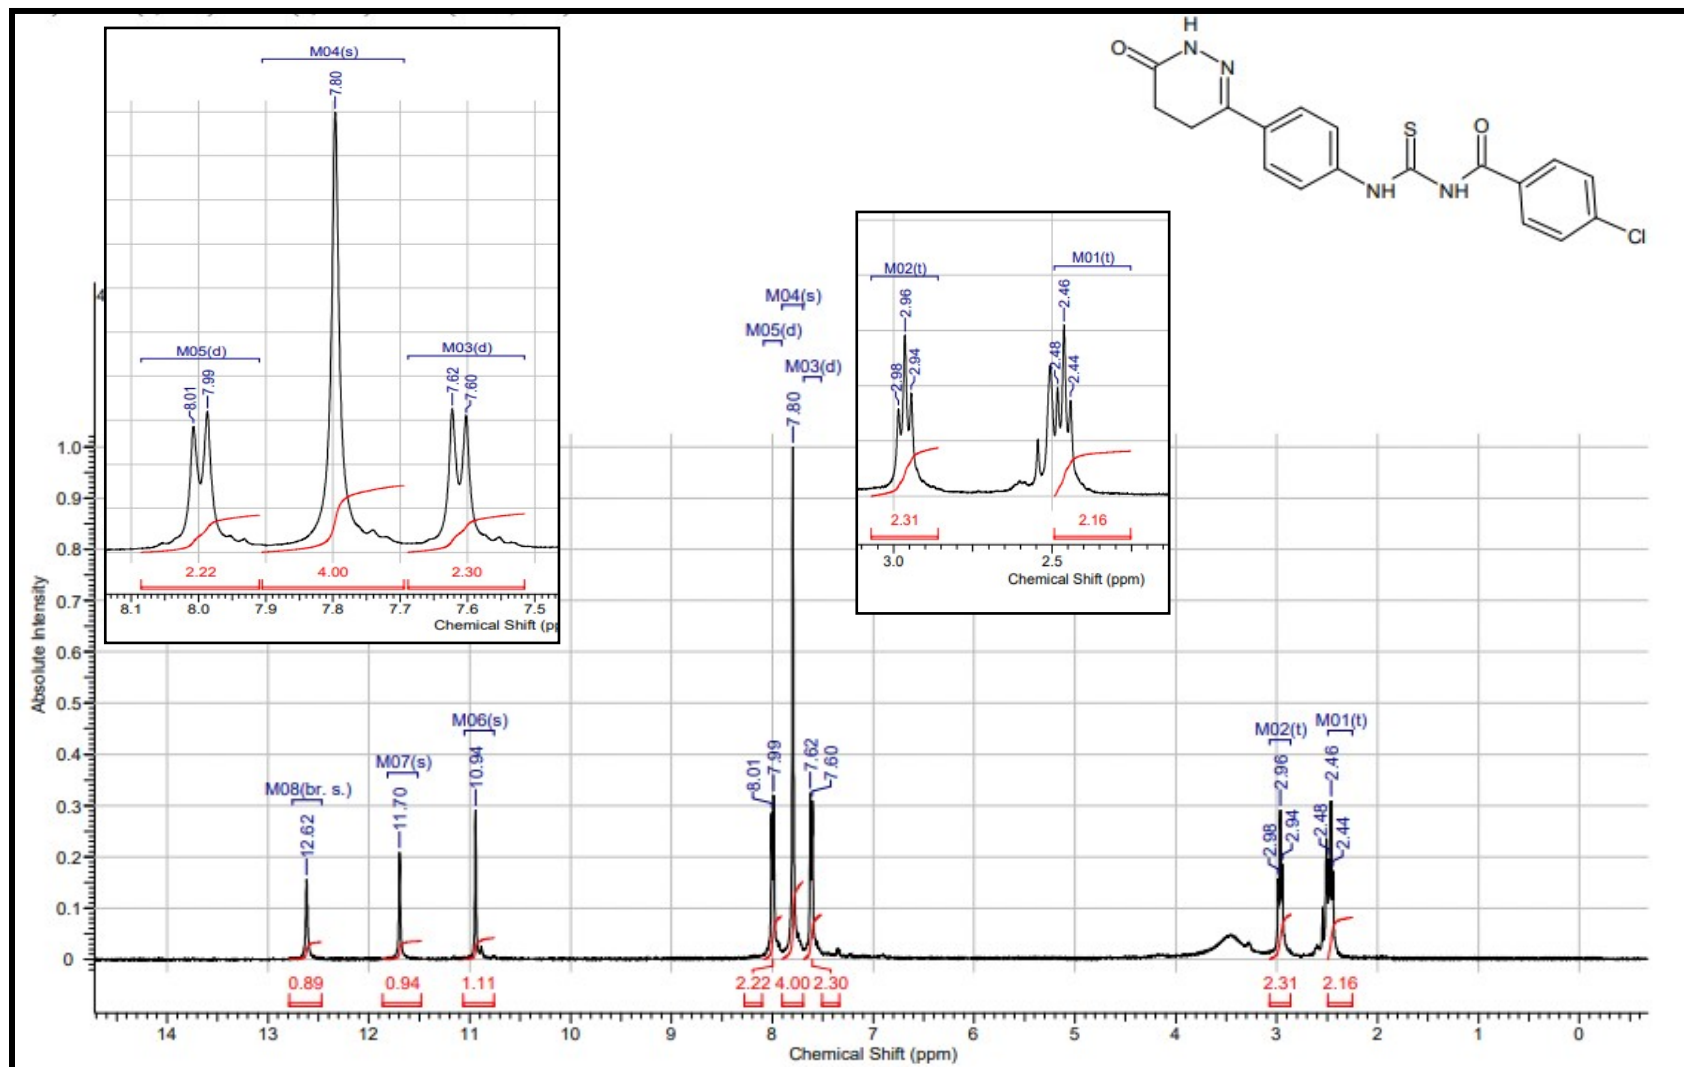

Figure 12a. <sup>1</sup>H NMR spectrum (400 MHz) of compound 9b in DMSO-d<sub>6</sub>.

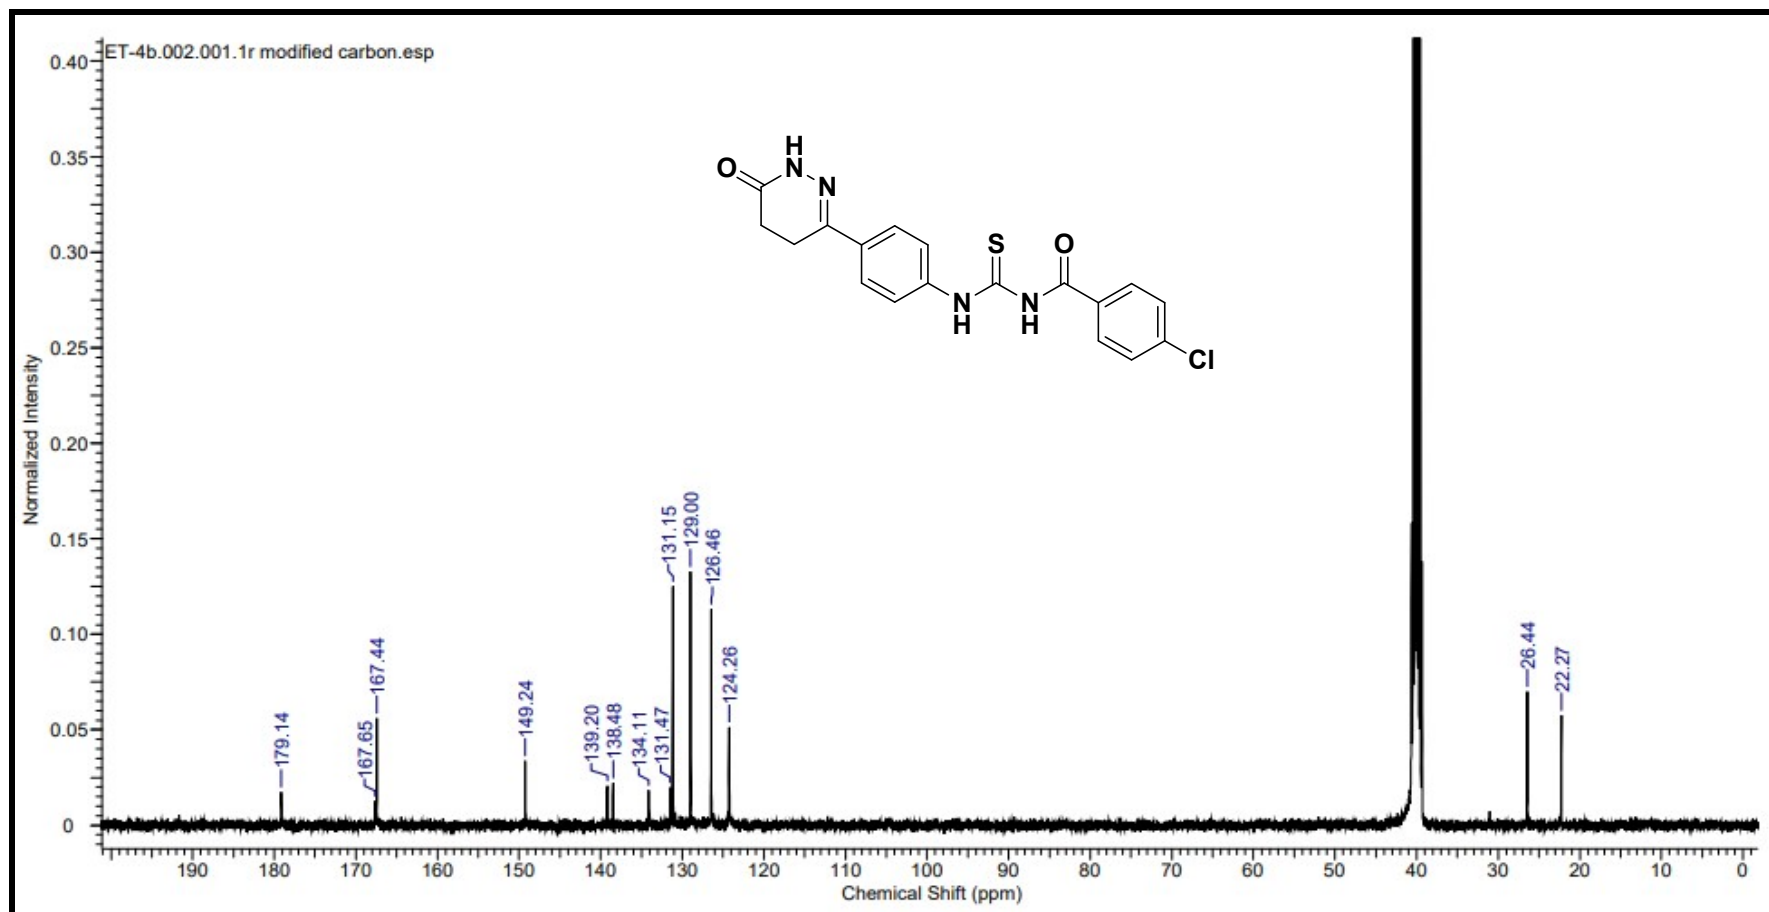

**Figure 12b.**  $^{13}\text{C}$  NMR spectrum (100 MHz) of compound 9b in  $\text{DMSO-d}_6$ .

### Single Mass Analysis

Tolerance = 3.0 PPM / DBE: min = -1.5, max = 13.0

Element prediction: Off

Number of isotope peaks used for i-FIT = 3

Monoisotopic Mass, Even Electron Ions

436 formula(e) evaluated with 1 results within limits (up to 50 closest results for each mass)

Elements Used:

C: 0-30 H: 0-20 N: 0-5 O: 0-4 S: 0-1 35Cl: 0-1 37Cl: 0-1

ET-4b/AJ

SYNAPT G2-Si#NotSet

27-Feb-2023

67562

12:03:38

0567 81 (0.176) Cm (80:93)

1: TOF MS ES+

5.17e+004

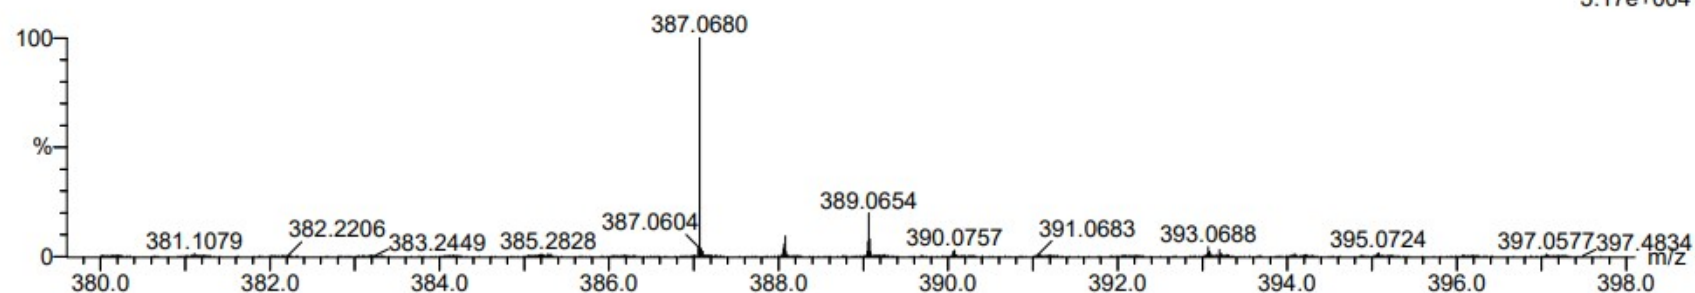

Minimum:

Maximum: 5.0 3.0 -1.5 13.0

| Mass     | Calc. Mass | mDa  | PPM  | DBE  | i-FIT  | Formula              |
|----------|------------|------|------|------|--------|----------------------|
| 387.0680 | 387.0682   | -0.2 | -0.5 | 12.5 | 1063.8 | C18 H16 N4 O2 S 35Cl |

Figure 12c. HRMS of compound 9b.

## 2.3. Compound 9c

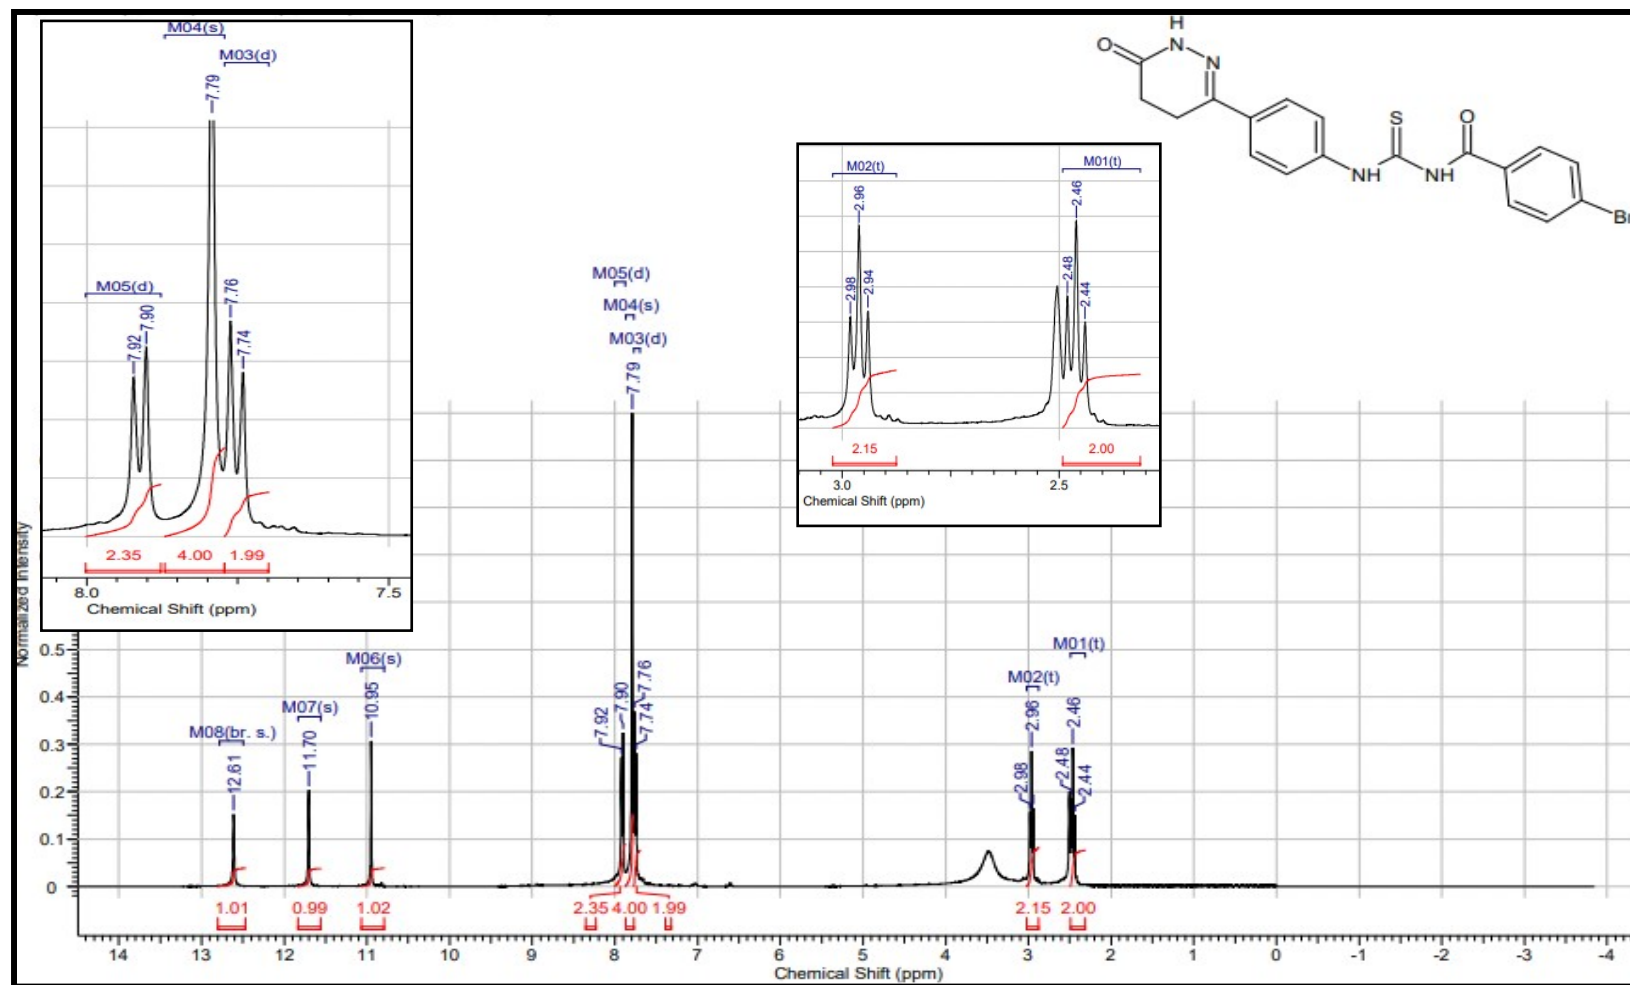

Figure 13a. <sup>1</sup>H NMR spectrum (400 MHz) of compound 9c in DMSO-d<sub>6</sub>.

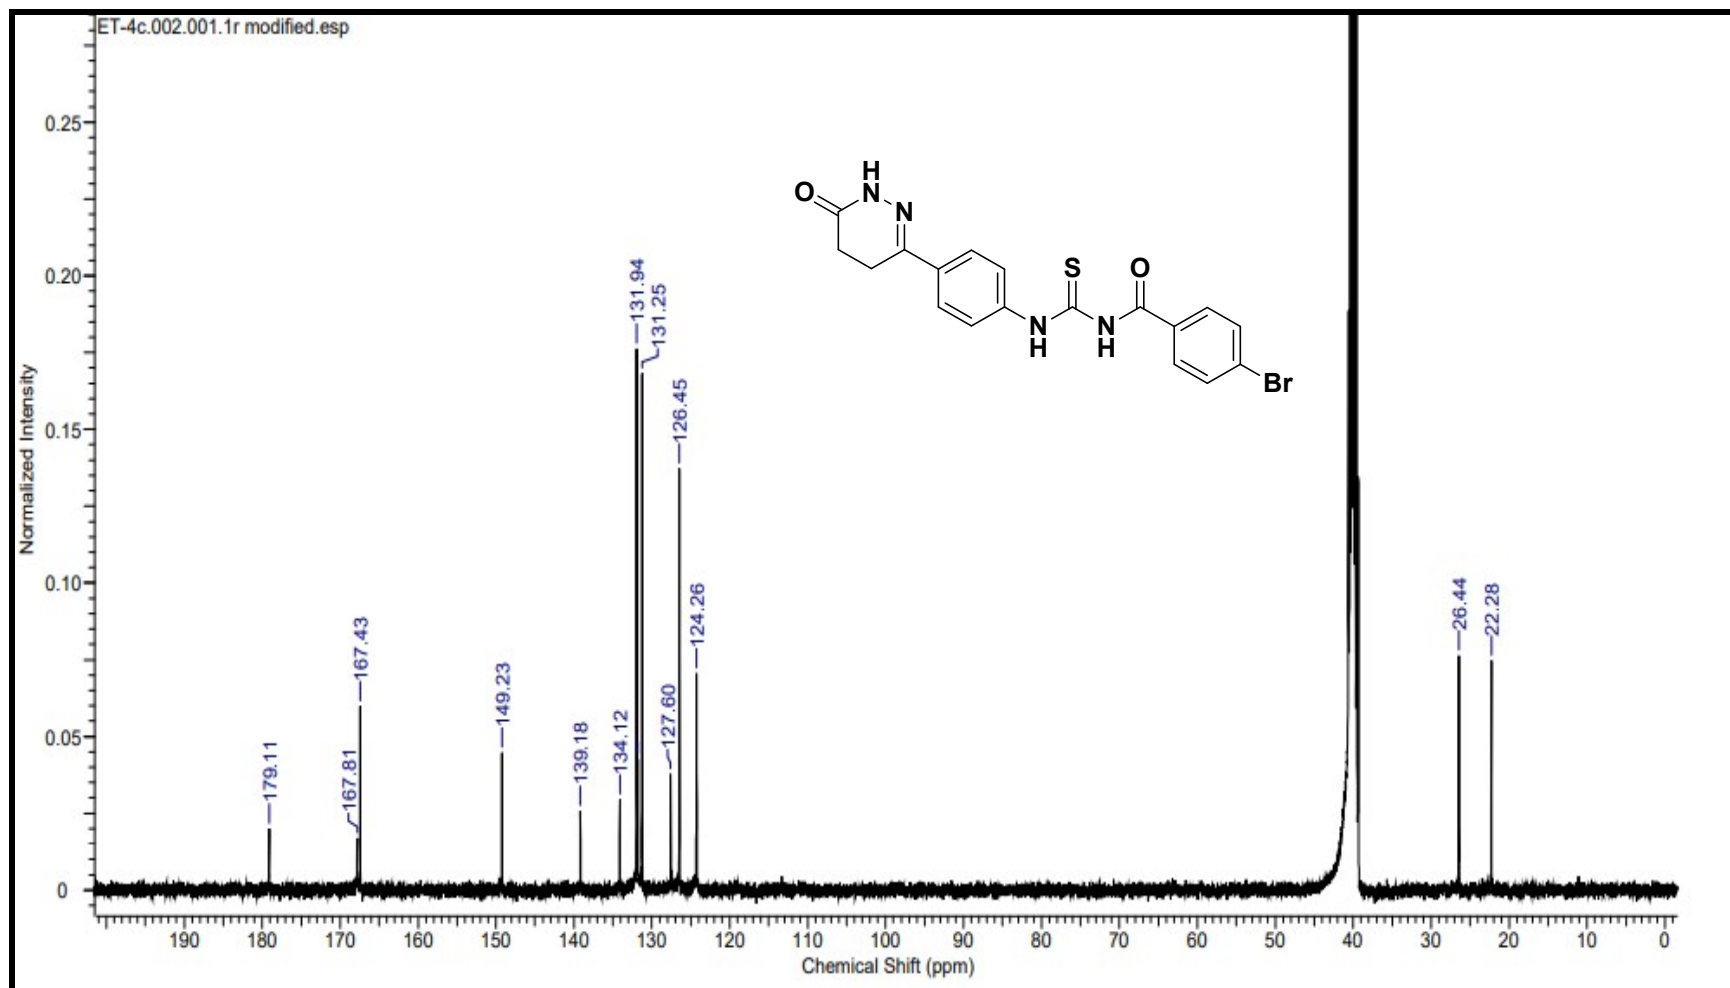

**Figure 13b.**  $^{13}\text{C}$  NMR spectrum (100 MHz) of compound 9c in  $\text{DMSO-d}_6$ .



### Single Mass Analysis

Tolerance = 3.0 PPM / DBE: min = -1.5, max = 13.0

Element prediction: Off

Number of isotope peaks used for i-FIT = 3

Monoisotopic Mass, Even Electron Ions

411 formula(e) evaluated with 1 results within limits (up to 50 closest results for each mass)

Elements Used:

C: 0-30 H: 0-20 N: 0-5 O: 0-4 S: 0-1 79Br: 0-1 81Br: 0-1

ET-4c/AJ

SYNAPTG2-Si#NotSet

27-Feb-2023

67561

12:07:17

0568 1326 (2.618) Cm (1306:1330)

1: TOF MS ES+

7.51e+005

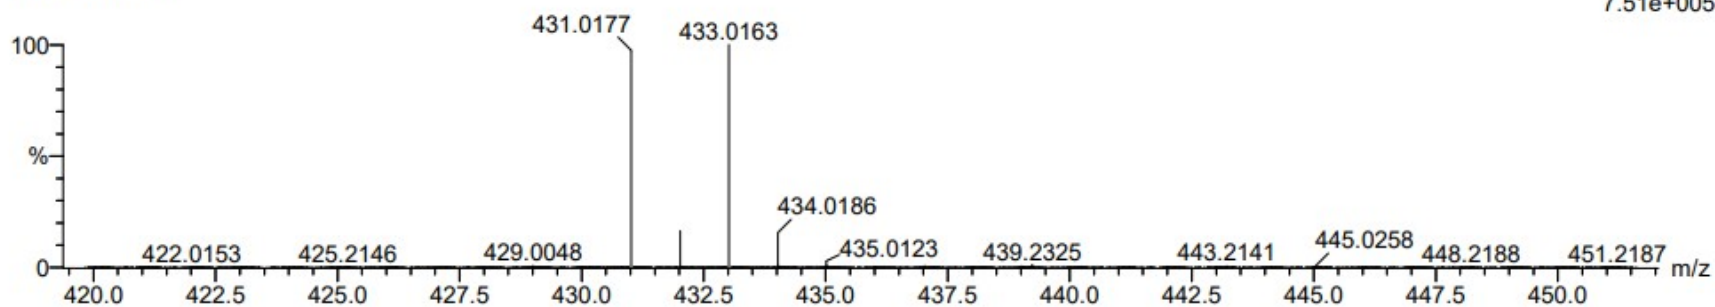

Minimum: -1.5  
Maximum: 5.0 3.0 13.0

| Mass     | Calc. Mass | mDa | PPM | DBE  | i-FIT  | Formula              |
|----------|------------|-----|-----|------|--------|----------------------|
| 431.0177 | 431.0177   | 0.0 | 0.0 | 12.5 | 2065.6 | C18 H16 N4 O2 S 79Br |

Figure 13c. HRMS of compound 9c.

## 2.4. Compound 9d

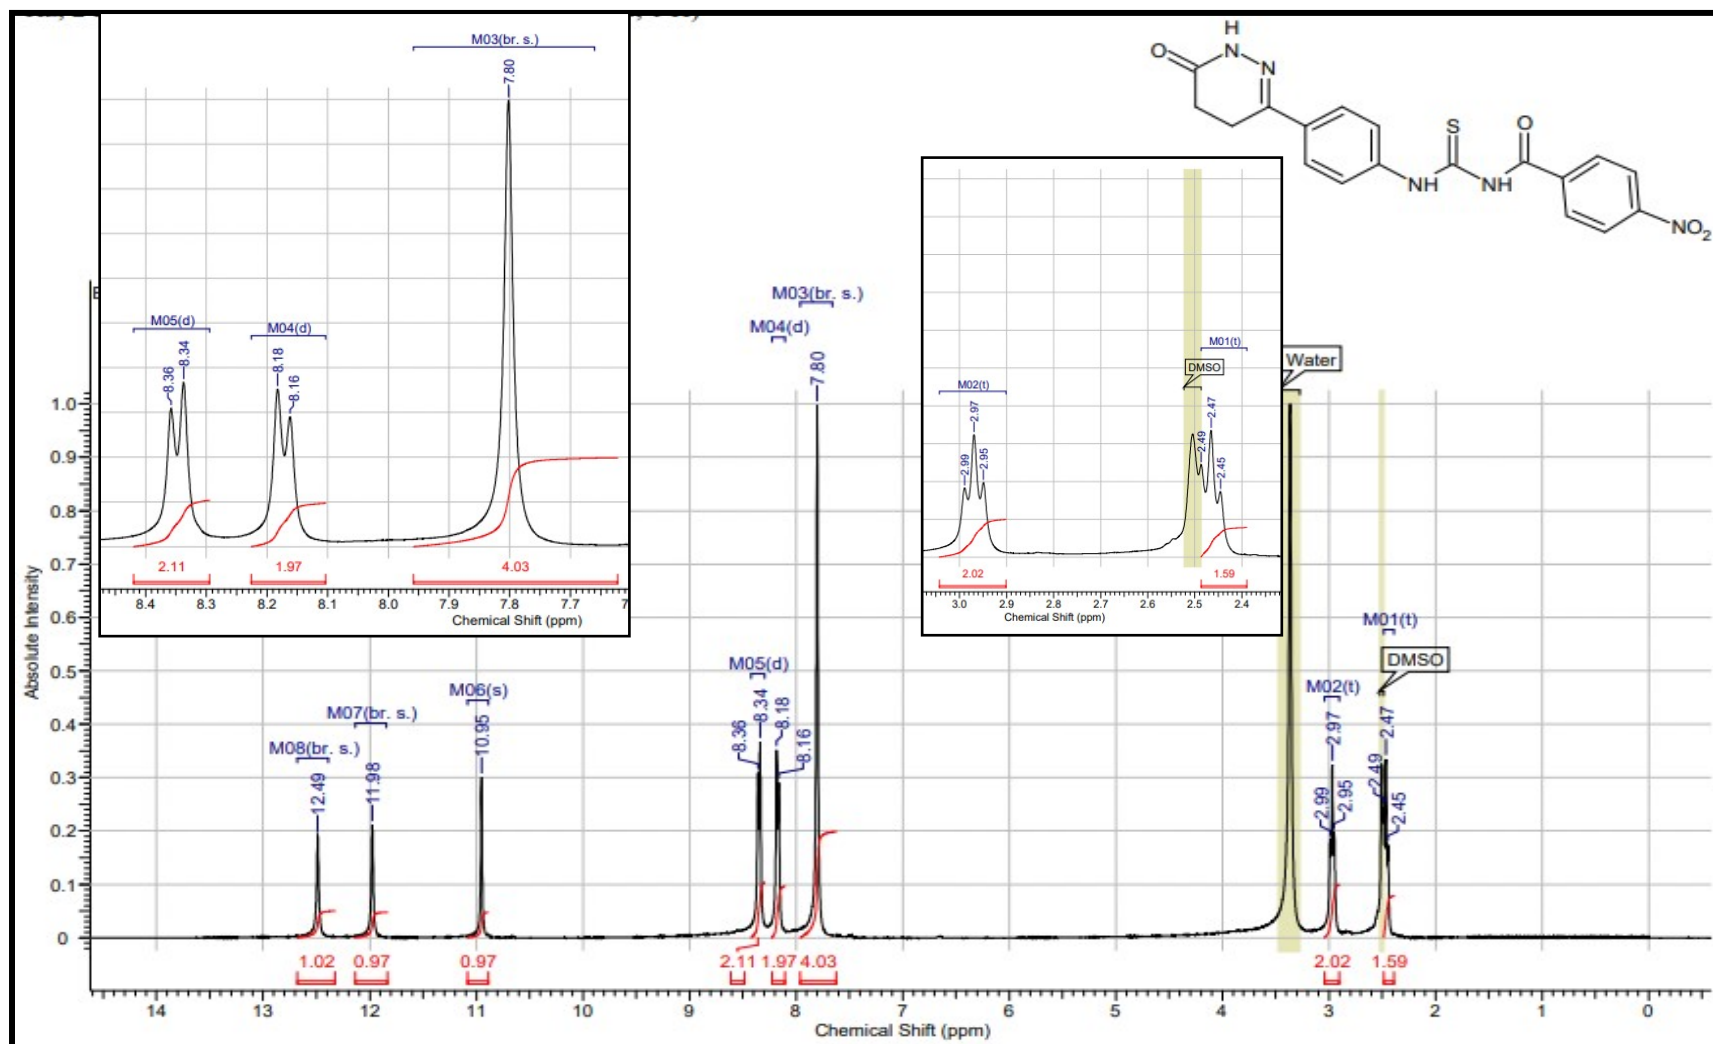

Figure 14a. <sup>1</sup>H NMR spectrum (400 MHz) of compound 9d in DMSO-d<sub>6</sub>.

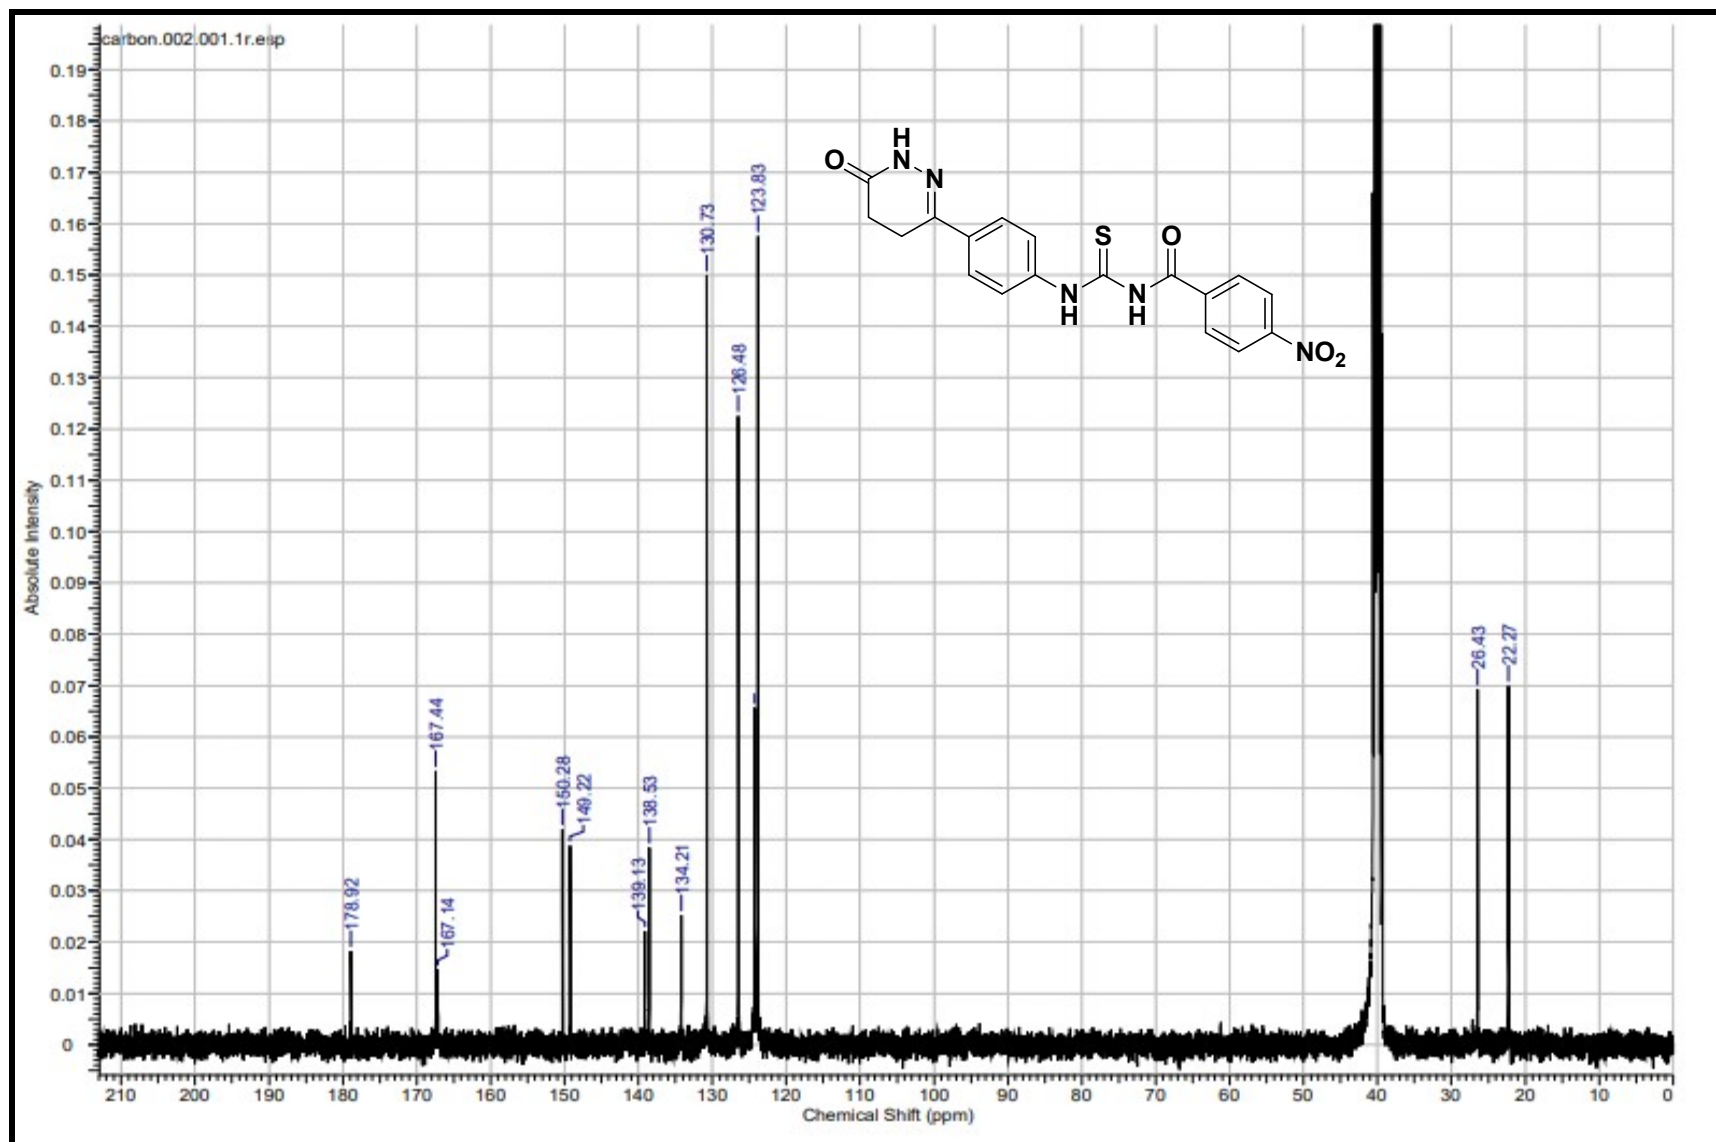

**Figure 14b.**  $^{13}\text{C}$  NMR spectrum (100 MHz) of compound 9d in  $\text{DMSO-d}_6$ .

### Single Mass Analysis

Tolerance = 3.0 PPM / DBE: min = -1.5, max = 14.0

Element prediction: Off

Number of isotope peaks used for i-FIT = 3

Monoisotopic Mass, Even Electron Ions

105 formula(e) evaluated with 1 results within limits (up to 50 closest results for each mass)

Elements Used:

C: 0-30 H: 0-20 N: 0-5 O: 0-4 S: 0-1

ET-4d/AJ

67560

0569 185 (0.383) Cm (184:197)

1: TOF MS ES+

SYNAPTG2-Si#NotSet

27-Feb-2023

12:10:55

7.04e+004

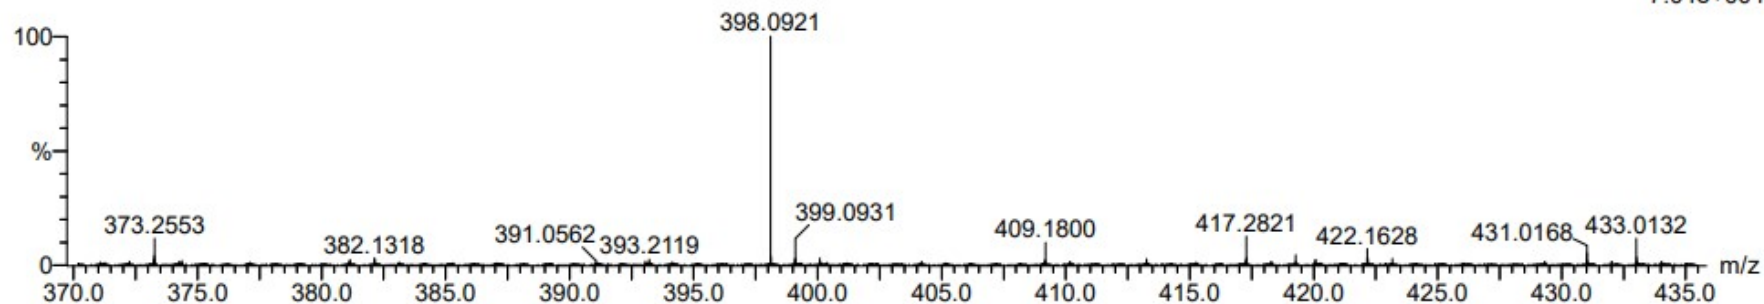

Minimum: -1.5  
Maximum: 5.0 3.0 14.0

| Mass     | Calc. Mass | mDa  | PPM  | DBE  | i-FIT  | Formula         |
|----------|------------|------|------|------|--------|-----------------|
| 398.0921 | 398.0923   | -0.2 | -0.5 | 13.5 | 1163.4 | C18 H16 N5 O4 S |

Figure 14c. HRMS of compound 9d.

### 3. Spectral data of series III:

#### 3.1. Compound 10a

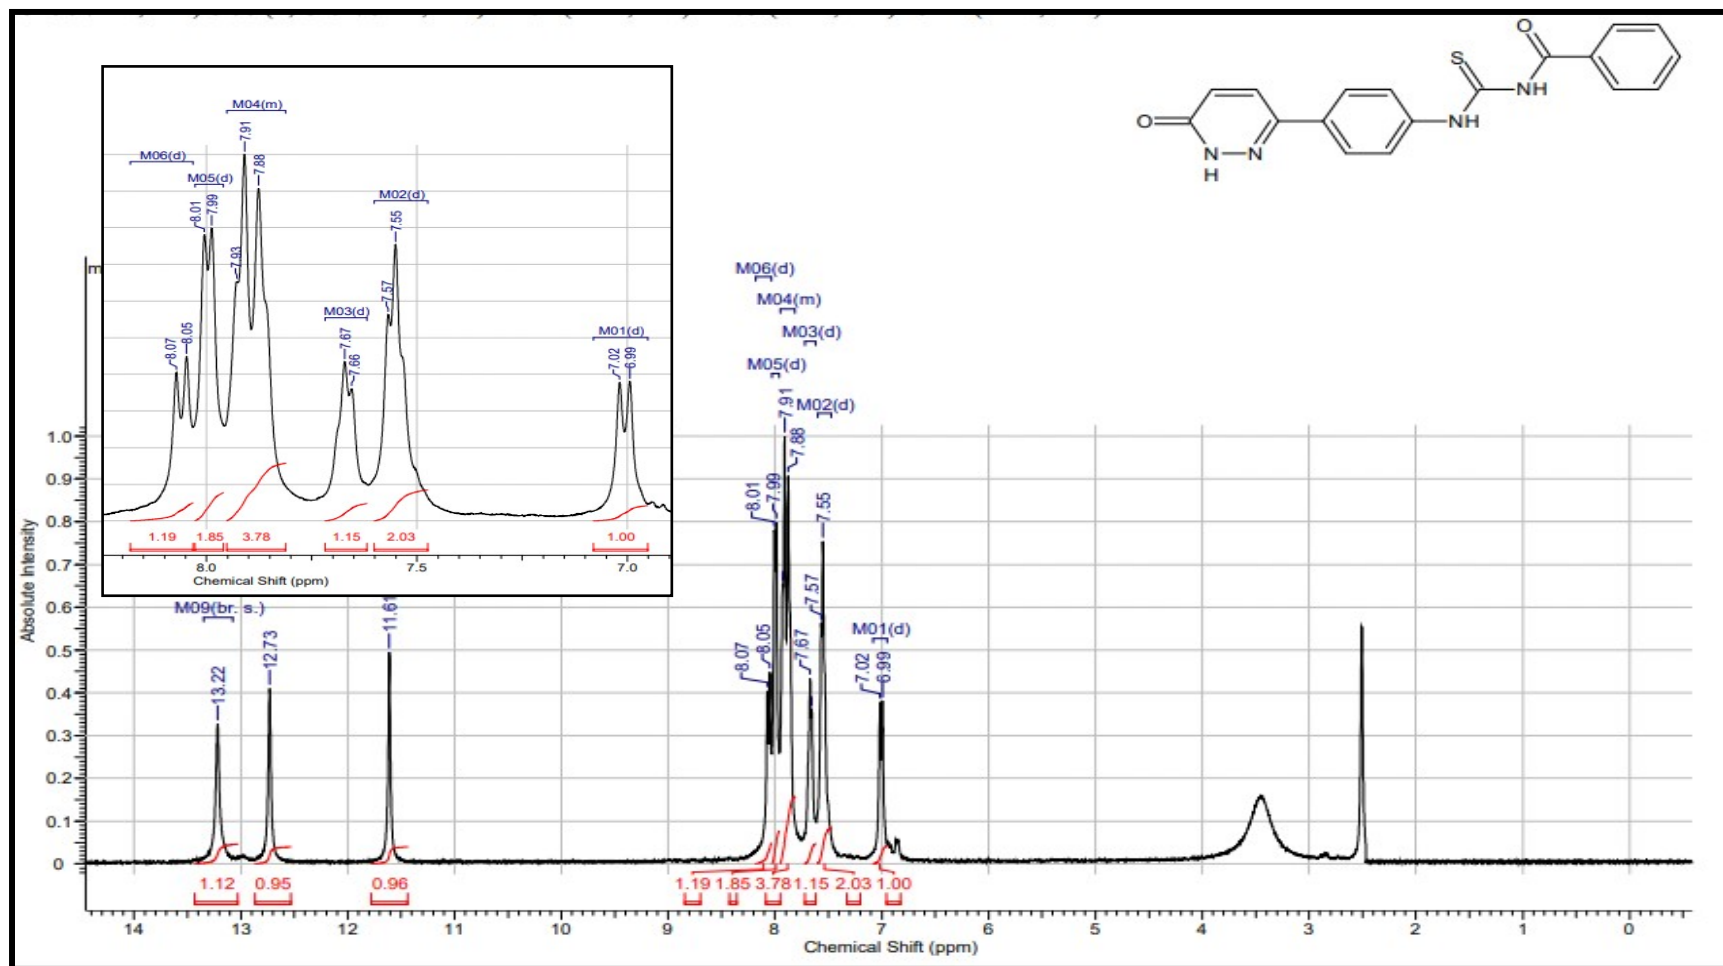

Figure 15a. <sup>1</sup>H NMR spectrum (400 MHz) of compound 10a in DMSO-d<sub>6</sub>.

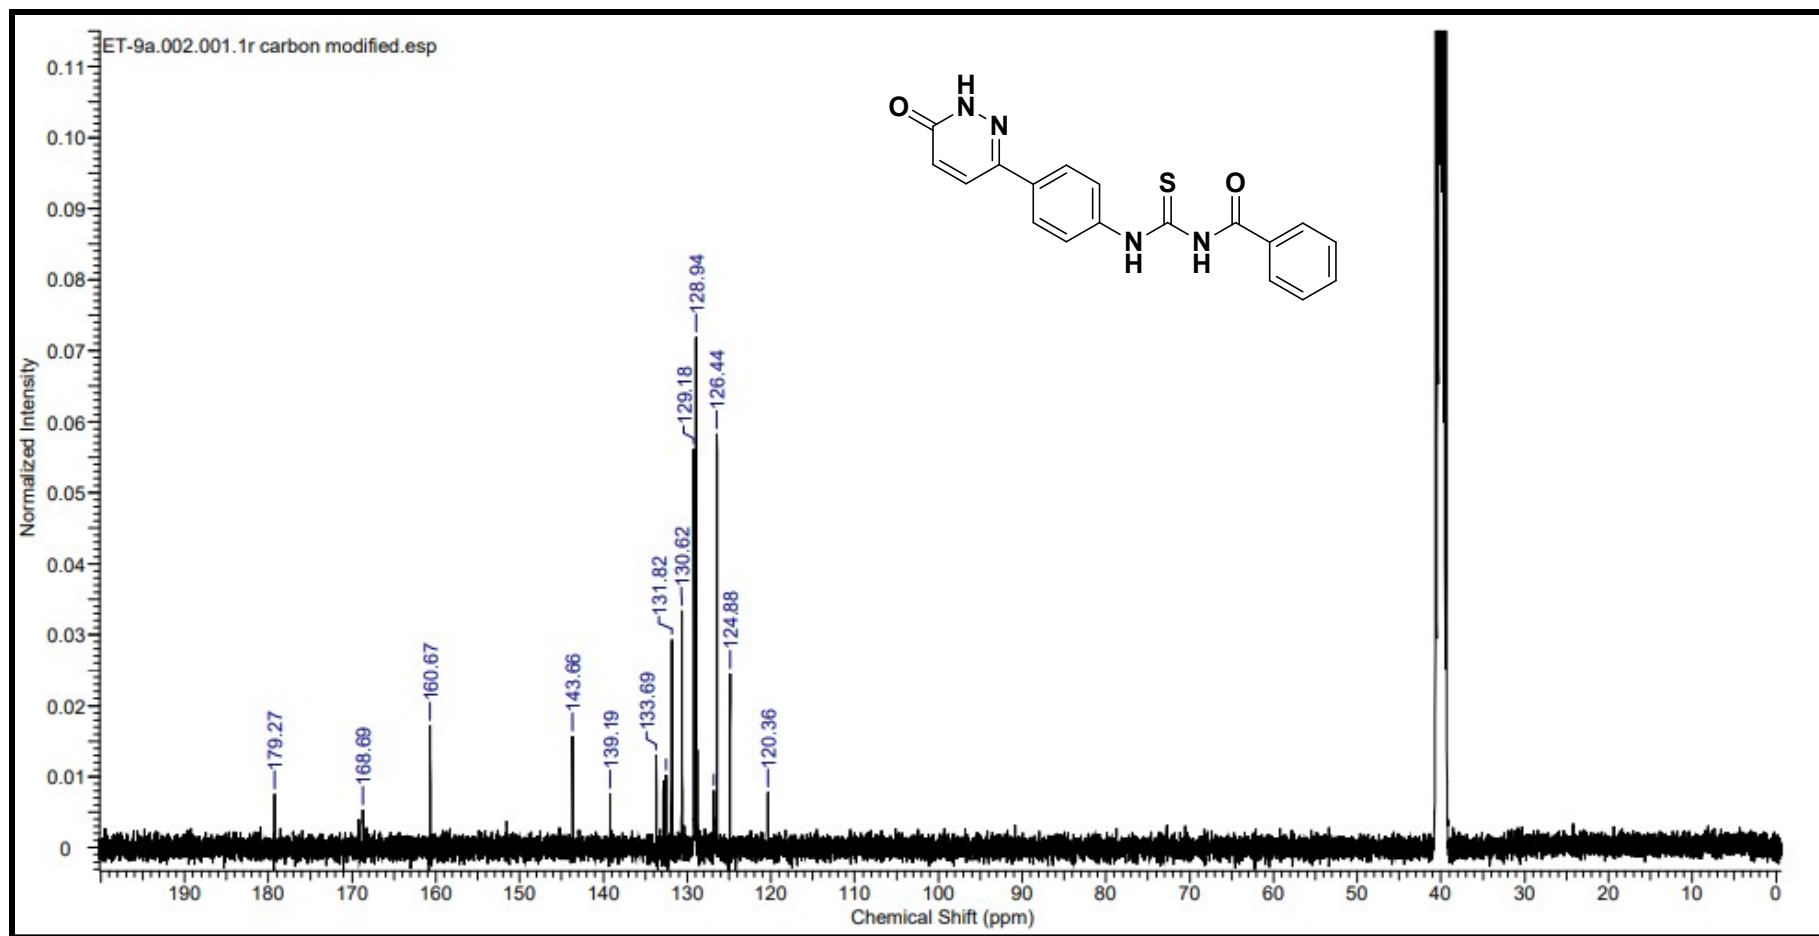

**Figure 15b.**  $^{13}\text{C}$  NMR spectrum (100 MHz) of compound 10a in  $\text{DMSO-d}_6$ .

### Single Mass Analysis

Tolerance = 3.0 PPM / DBE: min = -1.5, max = 20.0

Element prediction: Off

Number of isotope peaks used for i-FIT = 3

Monoisotopic Mass, Even Electron Ions

170 formula(e) evaluated with 1 results within limits (up to 50 closest results for each mass)

Elements Used:

C: 0-40 H: 0-60 N: 0-5 O: 0-2 S: 0-1

ET-9a-HRESI/AJ

67546

0501A 151 (0.313) Cm (134:154)

1: TOF MS ES+

SYNAPTG2-Si#NotSet

21-Feb-2023

14:51:25

1.29e+005

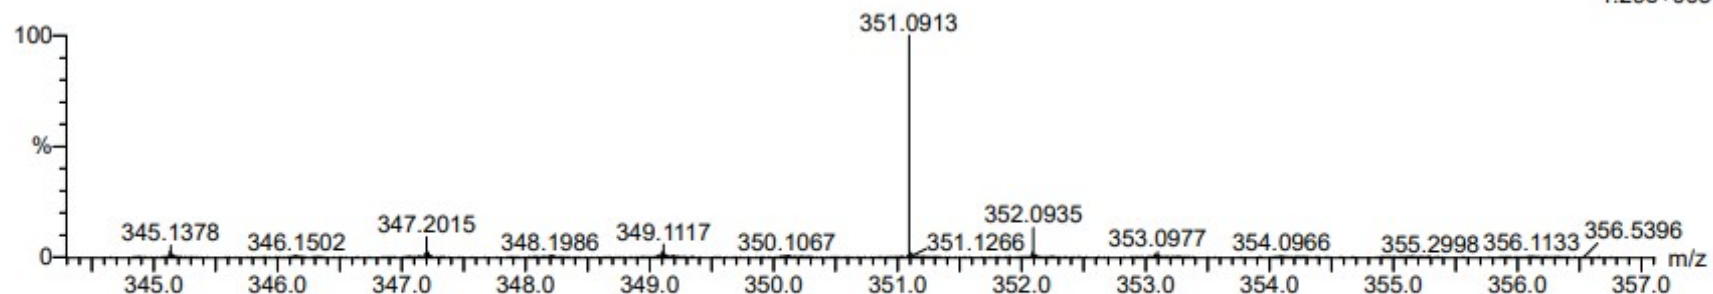

Minimum:

-1.5

Maximum:

5.0

3.0

20.0

| Mass     | Calc. Mass | mDa  | PPM  | DBE  | i-FIT  | Formula         |
|----------|------------|------|------|------|--------|-----------------|
| 351.0913 | 351.0916   | -0.3 | -0.9 | 13.5 | 1166.6 | C18 H15 N4 O2 S |

Figure 15c. HRMS of compound 10a.

### 3.2. Compound 10b

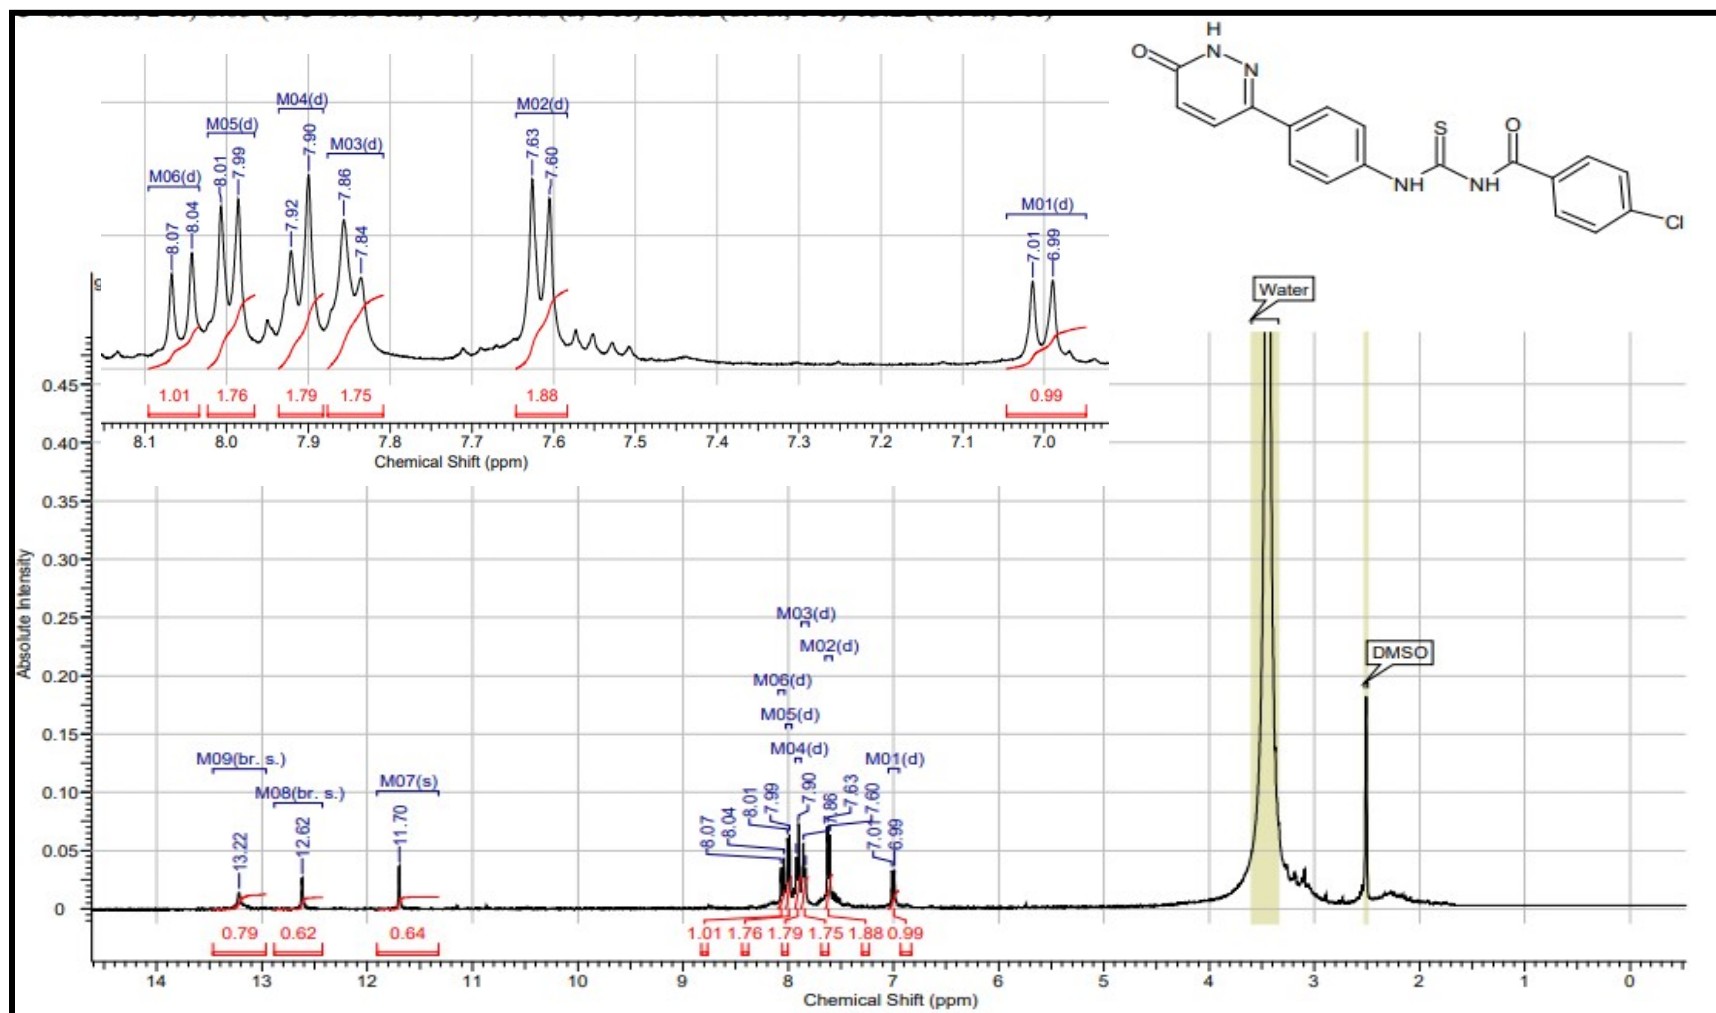

Figure 16a. <sup>1</sup>H NMR spectrum (400 MHz) of compound 10b in DMSO-d<sub>6</sub>.



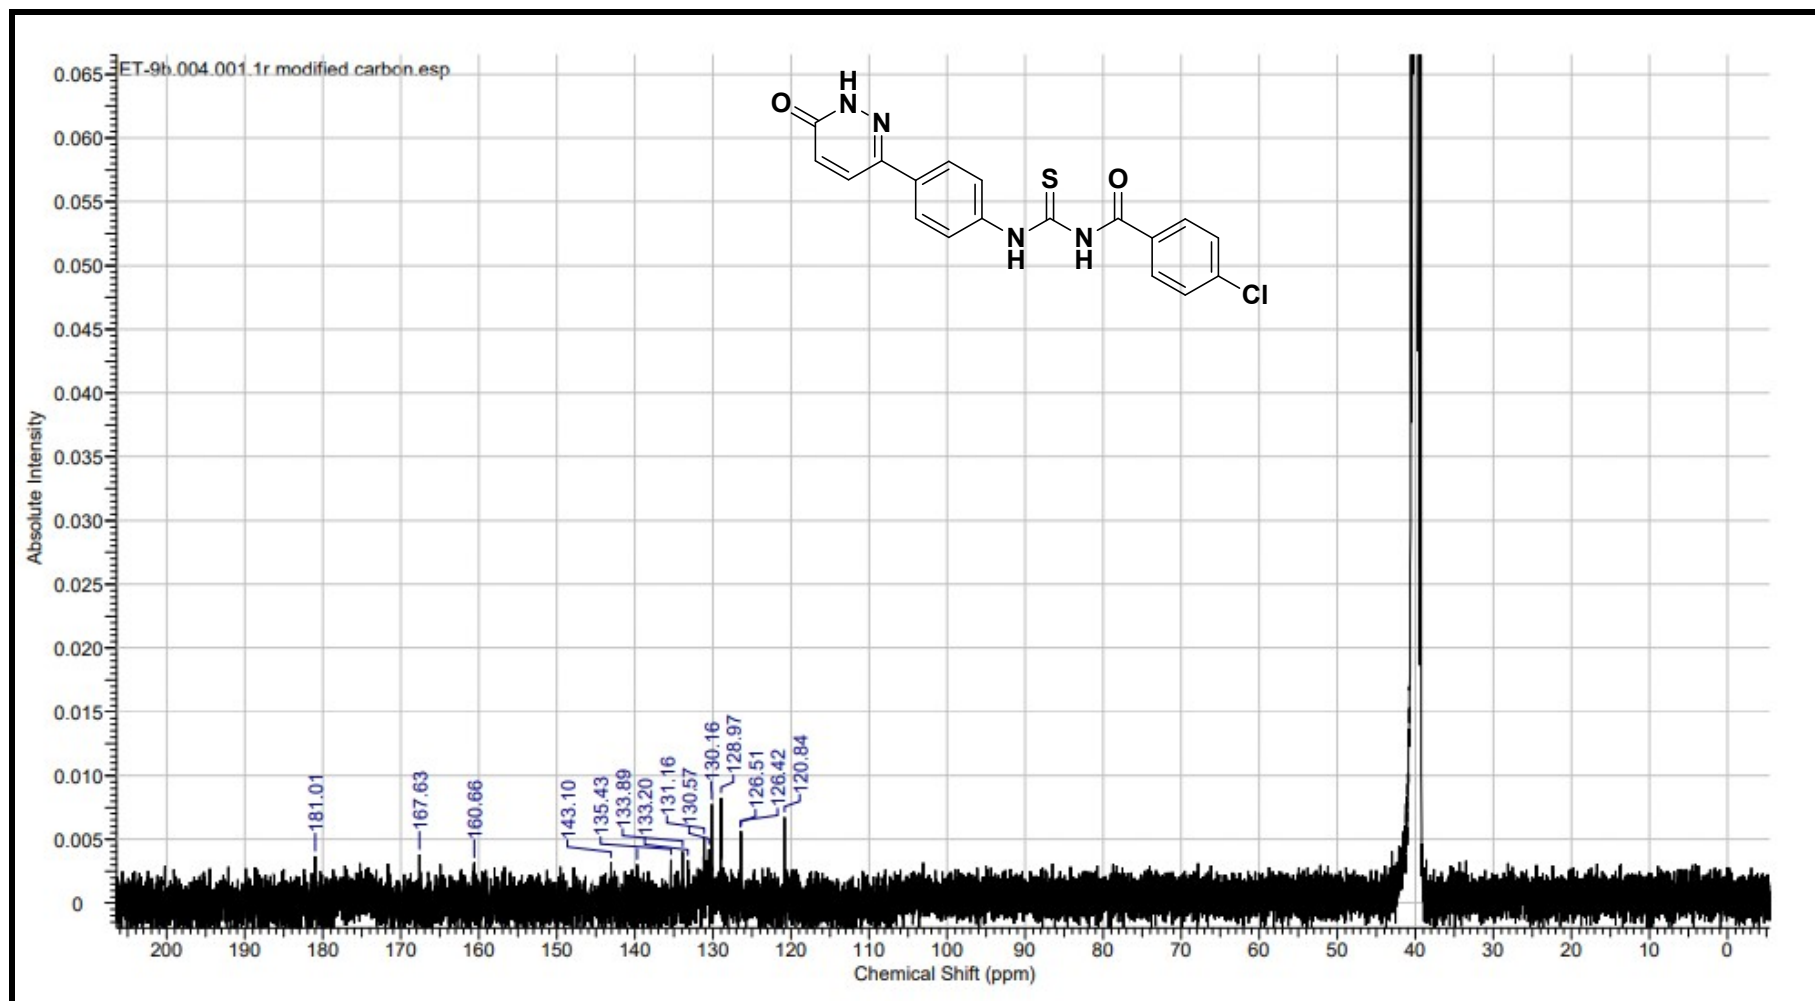

**Figure 16b.**  $^{13}\text{C}$  NMR spectrum (100 MHz) of compound 10b in  $\text{DMSO-d}_6$ .

### Single Mass Analysis

Tolerance = 3.0 PPM / DBE: min = -1.5, max = 20.0

Element prediction: Off

Number of isotope peaks used for i-FIT = 3

Monoisotopic Mass, Even Electron Ions

644 formula(e) evaluated with 1 results within limits (up to 50 closest results for each mass)

Elements Used:

C: 0-40 H: 0-60 N: 0-5 O: 0-2 S: 0-1 35Cl: 0-1 37Cl: 0-1

ET-9b-HRESI/AJ

SYNAPTG2-Si#NotSet

22-Feb-2023

67547

10:56:04

0502B 84 (0.185) Cm (38:84)

1: TOF MS ES+

9.96e+004

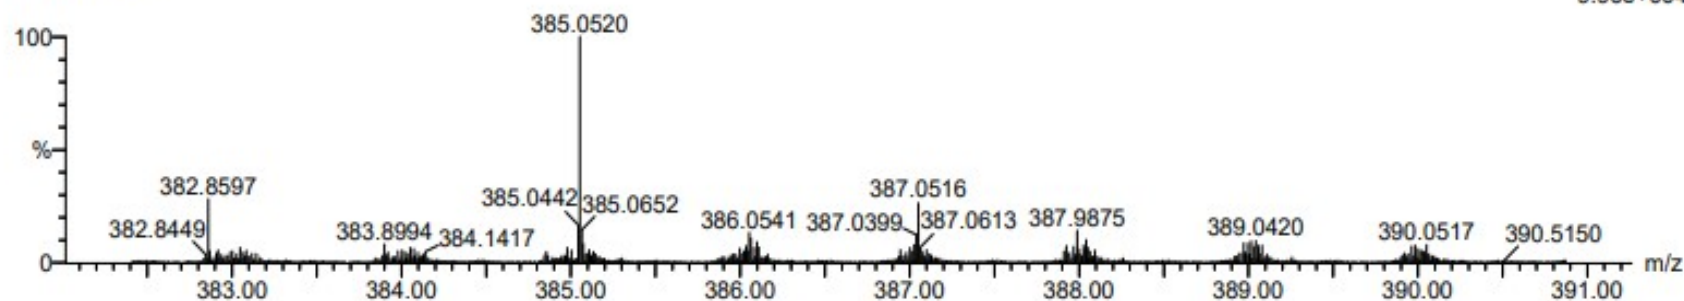

Minimum:

Maximum:

5.0 3.0 -1.5  
20.0

| Mass     | Calc. Mass | mDa  | PPM  | DBE  | i-FIT  | Formula              |
|----------|------------|------|------|------|--------|----------------------|
| 385.0520 | 385.0526   | -0.6 | -1.6 | 13.5 | 3367.6 | C18 H14 N4 O2 S 35Cl |

Figure 16c. HRMS of compound 10b.

### 3.3. Compound 10c

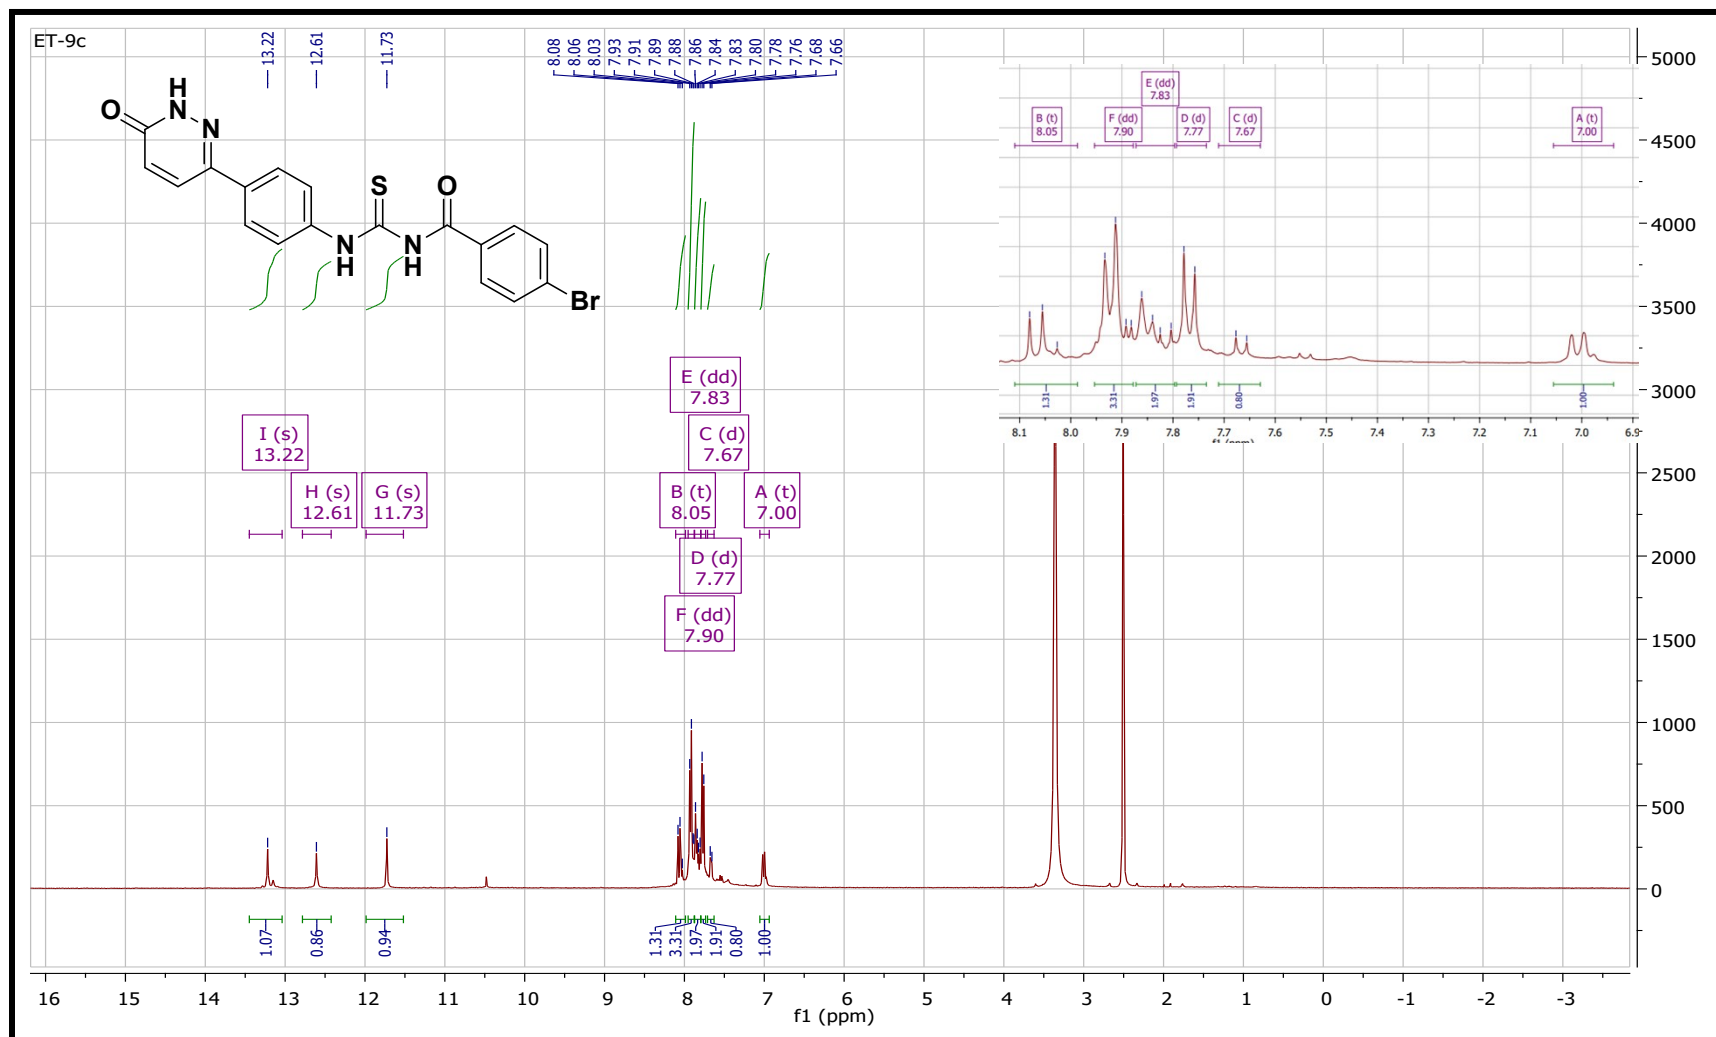

Figure 17a. <sup>1</sup>H NMR spectrum (400 MHz) of compound 10c in DMSO-d<sub>6</sub>.

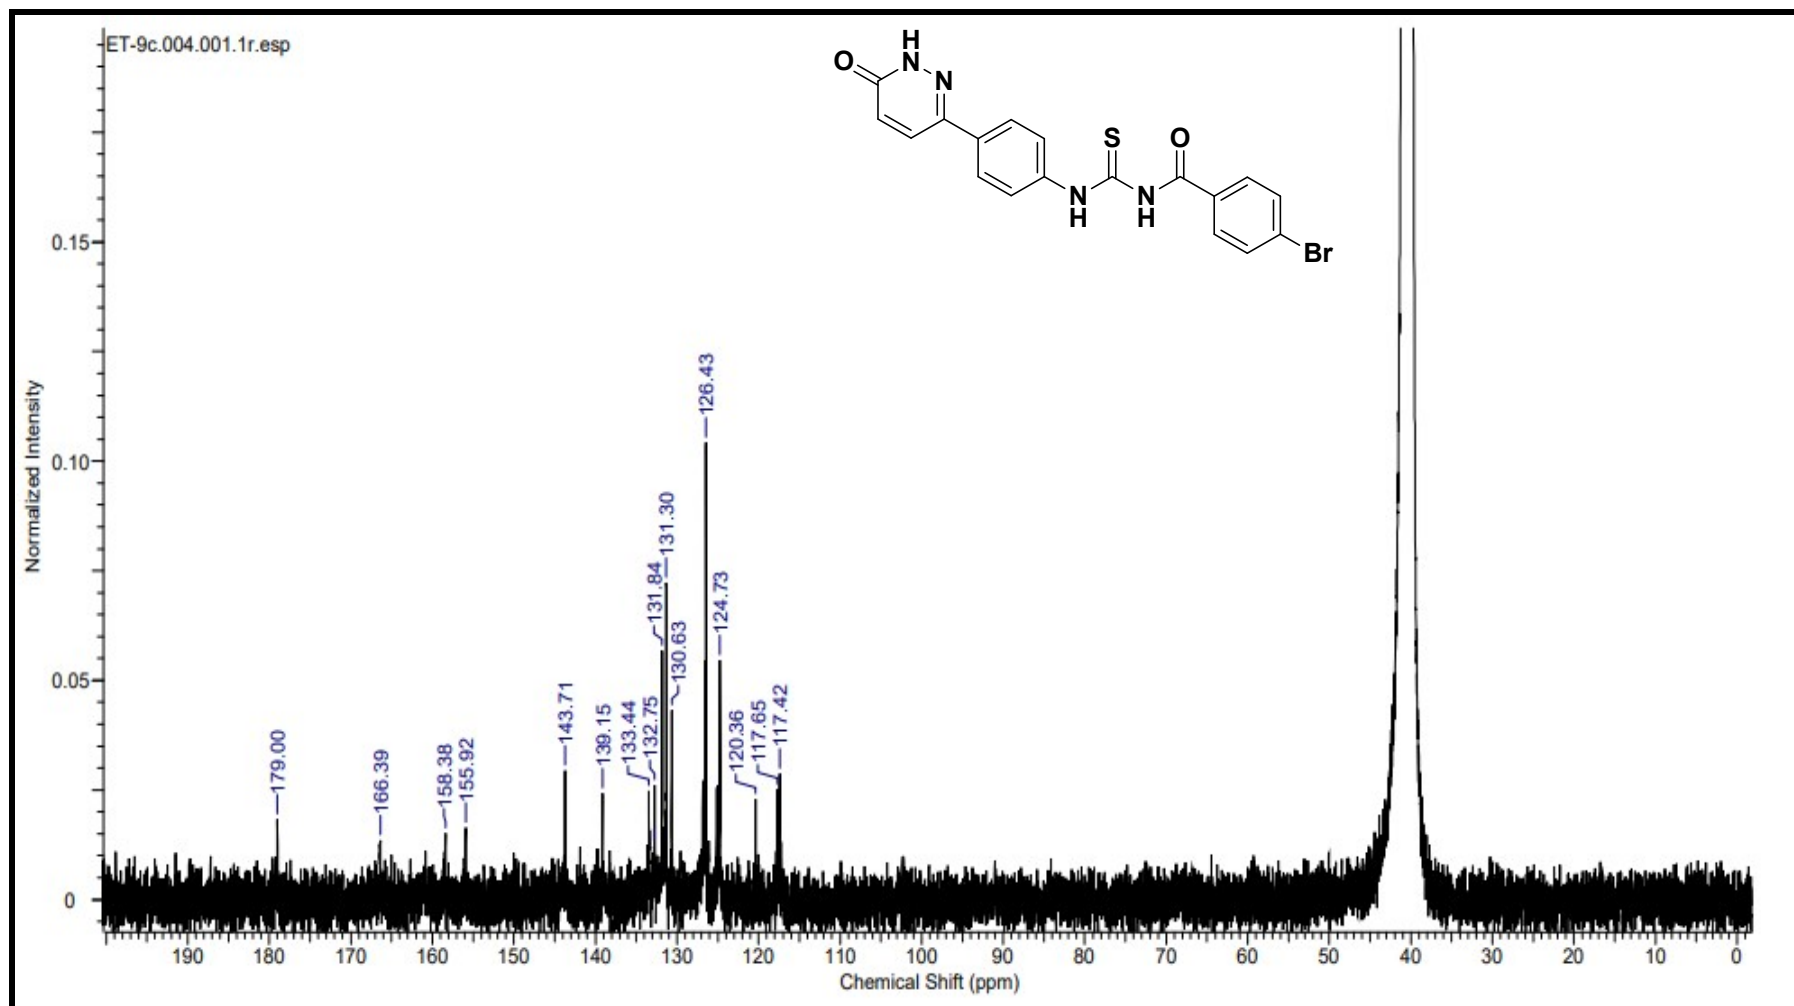

**Figure 17b.  $^{13}\text{C}$  NMR spectrum (100 MHz) of compound 10c in  $\text{DMSO-d}_6$ .**

### Single Mass Analysis

Tolerance = 3.0 PPM / DBE: min = -1.5, max = 20.0

Element prediction: Off

Number of isotope peaks used for i-FIT = 3

Monoisotopic Mass, Even Electron Ions

637 formula(e) evaluated with 1 results within limits (up to 50 closest results for each mass)

Elements Used:

C: 0-40 H: 0-60 N: 0-5 O: 0-2 S: 0-1 79Br: 0-1 81Br: 0-1

ET-9c-HRESI/AJ

SYNAPT2-Si#NotSet

21-Feb-2023

67548

14:58:49

0503 924 (1.829) Cm (912:928)

1: TOF MS ES+

1.31e+005

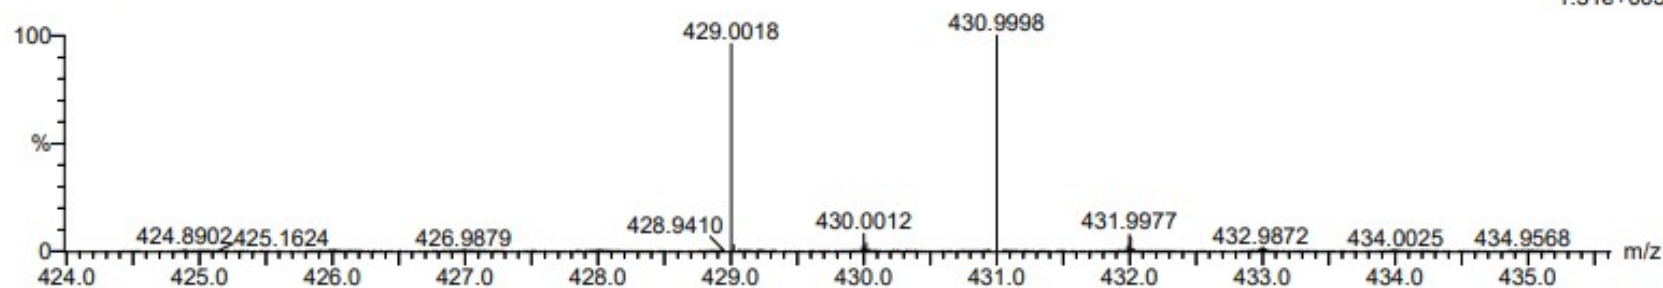

Minimum: -1.5  
Maximum: 5.0 3.0 20.0

| Mass     | Calc. Mass | mDa  | PPM  | DBE  | i-FIT  | Formula              |
|----------|------------|------|------|------|--------|----------------------|
| 429.0018 | 429.0021   | -0.3 | -0.7 | 13.5 | 1459.3 | C18 H14 N4 O2 S 79Br |

Figure 17c. HRMS of compound 10c.

### 3.4. Compound 10d

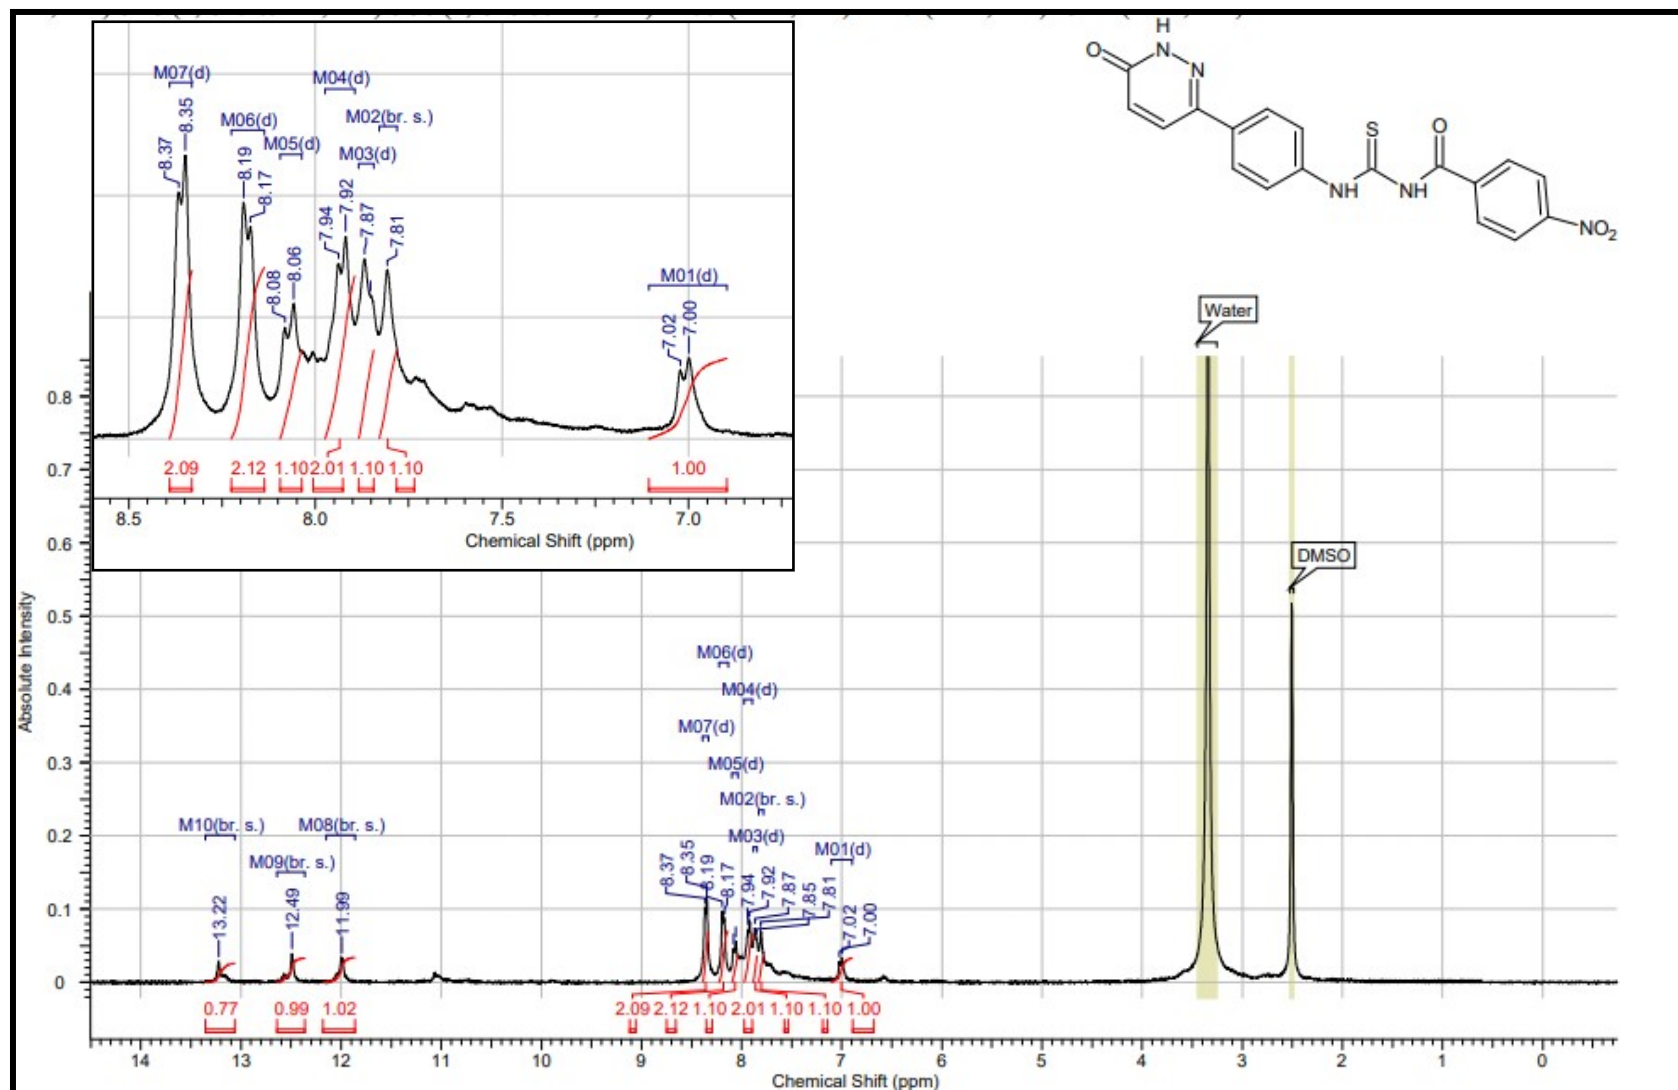

Figure 18a.  $^1\text{H}$  NMR spectrum (400 MHz) of compound 10d in  $\text{DMSO-d}_6$ .

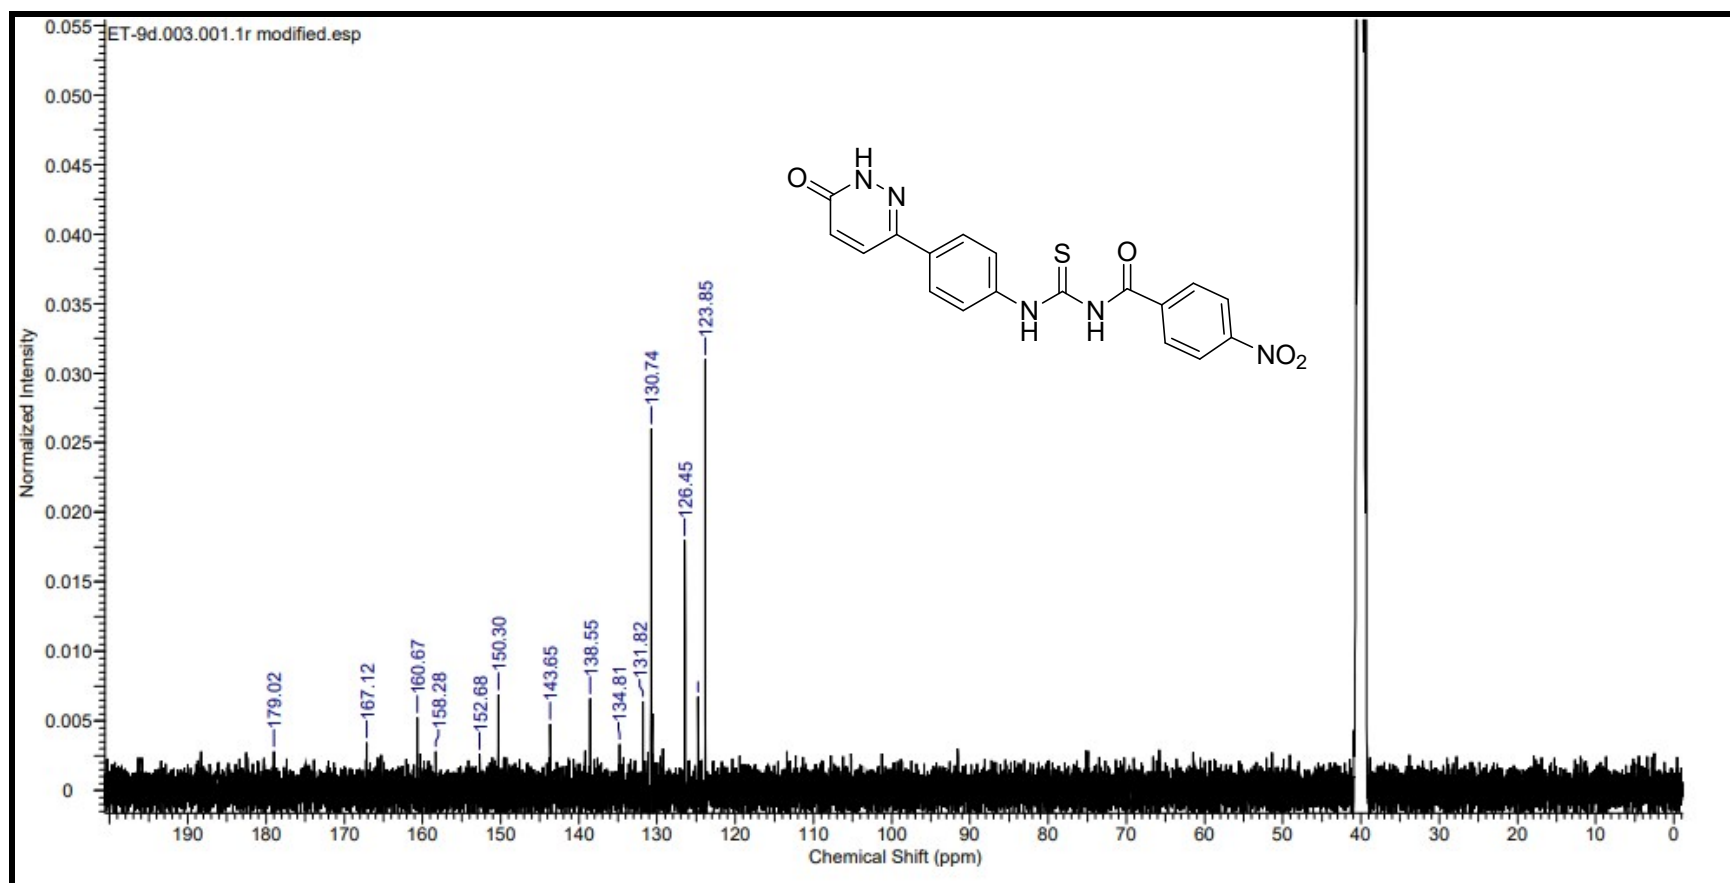

Figure 18b.  $^{13}\text{C}$  NMR spectrum (100 MHz) of compound 10d in  $\text{DMSO-d}_6$ .

### Single Mass Analysis

Tolerance = 3.0 PPM / DBE: min = -1.5, max = 15.0

Element prediction: Off

Number of isotope peaks used for i-FIT = 3

Monoisotopic Mass, Even Electron Ions

252 formula(e) evaluated with 1 results within limits (up to 50 closest results for each mass)

Elements Used:

C: 0-40 H: 0-40 N: 0-5 O: 0-5 S: 0-1

ET-9d-HRESI/AJ

67549

0499 173 (0.360) Cm (165:285-87:110)

1: TOF MS ES+

SYNAPTG2-Si#NotSet

22-Feb-2023

13:02:32

2.38e+005

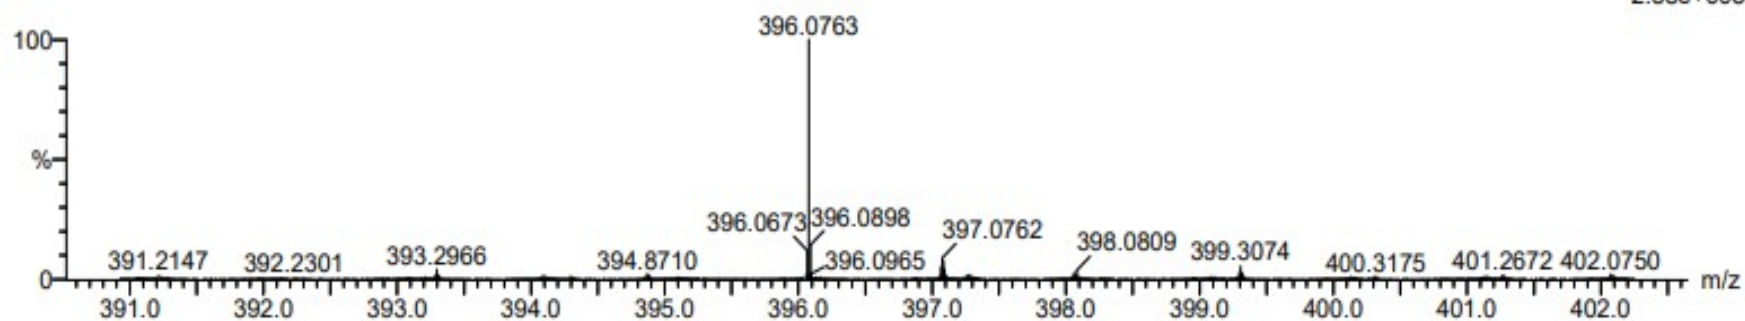

Minimum: -1.5  
Maximum: 5.0 3.0 15.0

| Mass     | Calc. Mass | mDa  | PPM  | DBE  | i-FIT  | Formula         |
|----------|------------|------|------|------|--------|-----------------|
| 396.0763 | 396.0766   | -0.3 | -0.8 | 14.5 | 2718.3 | C18 H14 N5 O4 S |

Figure 18c. HRMS of compound 10d.



### 3.5. Compound 10e

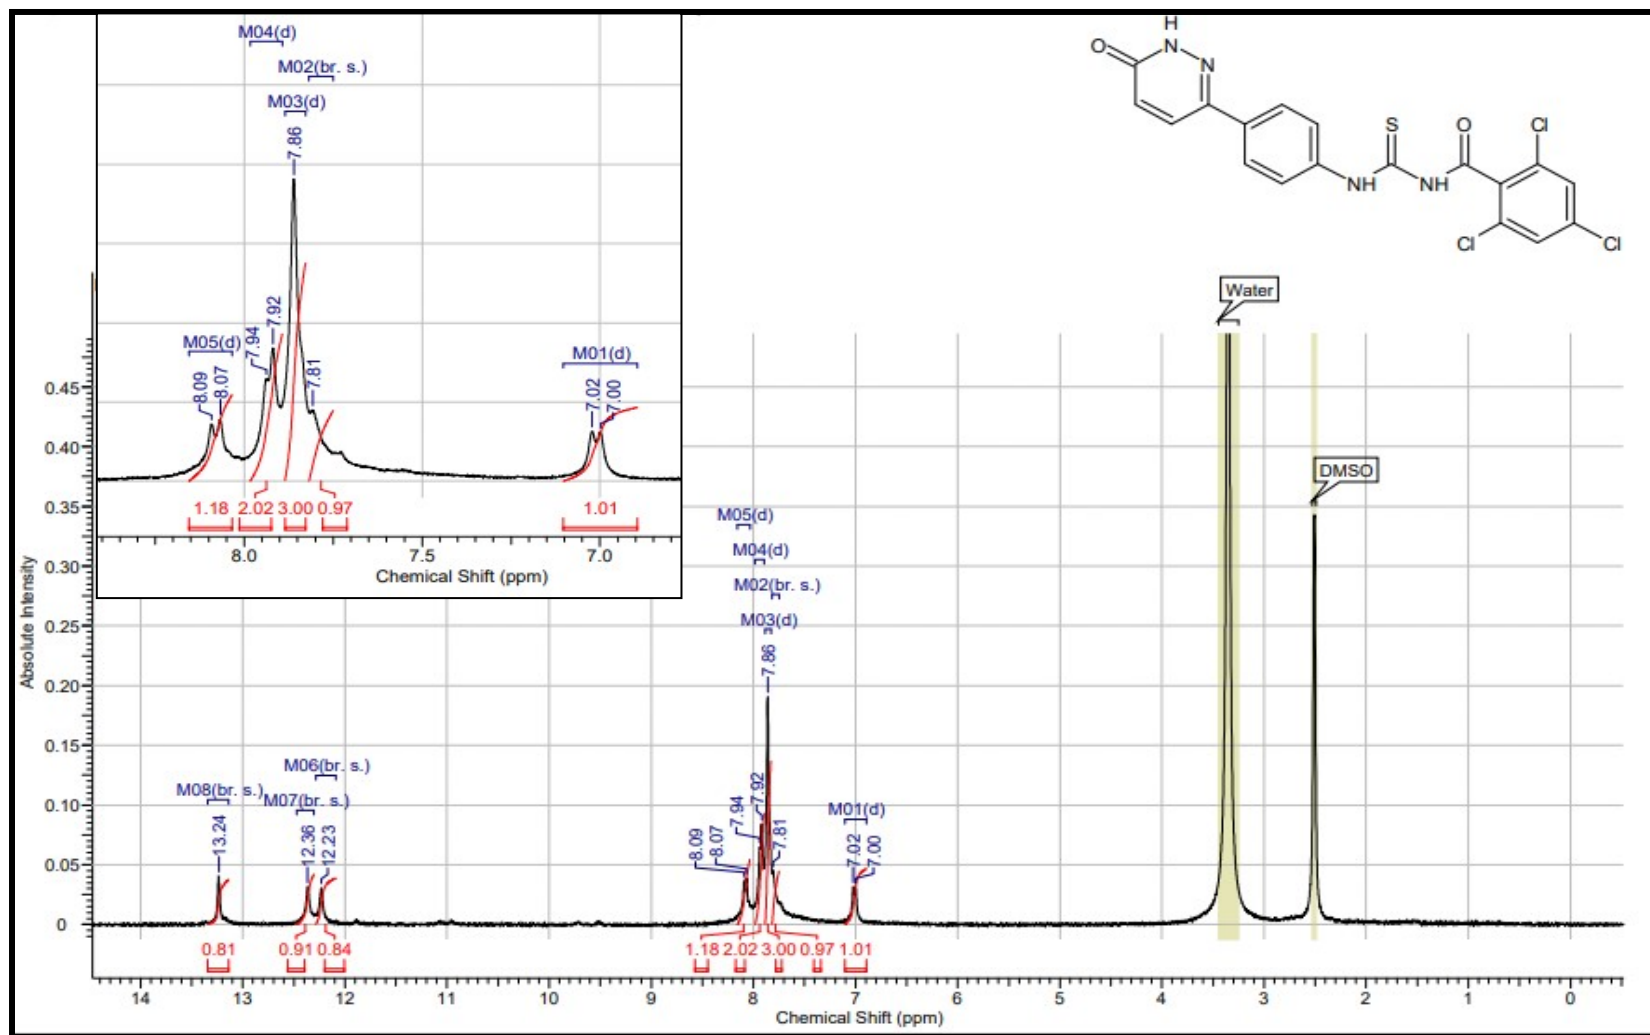

Fig

Figure 19a. <sup>1</sup>H NMR spectrum (400 MHz) of compound 10e in DMSO-d<sub>6</sub>.

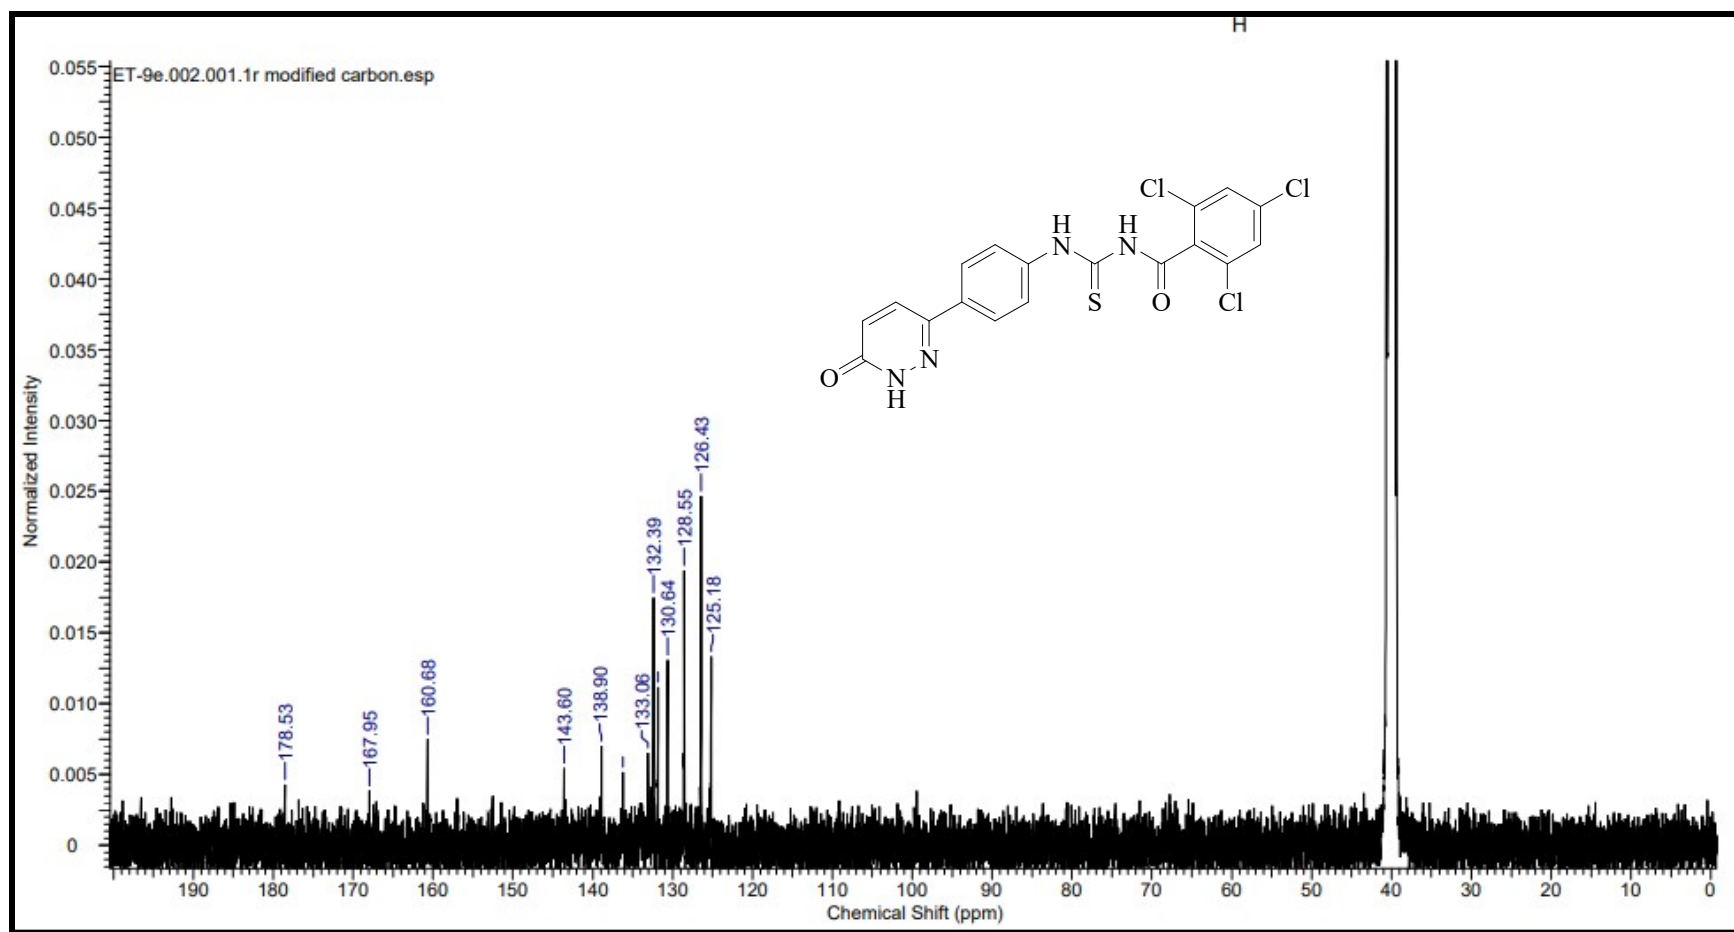

**Figure 19b.  $^{13}\text{C}$  NMR spectrum (100 MHz) of compound 10e in  $\text{DMSO-d}_6$ .**

### Single Mass Analysis

Tolerance = 3.0 PPM / DBE: min = -1.5, max = 14.0

Element prediction: Off

Number of isotope peaks used for i-FIT = 3

Monoisotopic Mass, Even Electron Ions

659 formula(e) evaluated with 1 results within limits (up to 50 closest results for each mass)

Elements Used:

C: 0-30 H: 0-16 N: 0-4 O: 0-2 S: 0-1 35Cl: 0-3 37Cl: 0-3

ET-9e-HRESI/AJ

SYNAPT G2-Si#NotSet

21-Feb-2023

67550

15:57:37

0500C 389 (0.781) Cm (372:428)

1: TOF MS ES+

5.54e+005

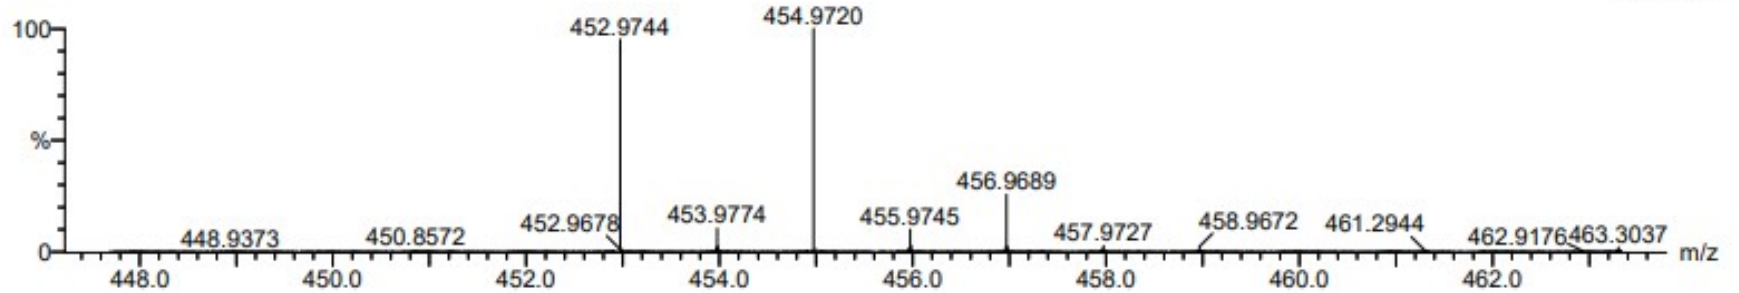

Minimum:

Maximum: 5.0 3.0 -1.5

| Mass     | Calc. Mass | mDa  | PPM  | DBE  | i-FIT  | Formula               |
|----------|------------|------|------|------|--------|-----------------------|
| 452.9744 | 452.9747   | -0.3 | -0.7 | 13.5 | 2845.0 | C18 H12 N4 O2 S 35Cl3 |

Figure 19c. HRMS of compound 10e.

### 3.6. Compound 10f

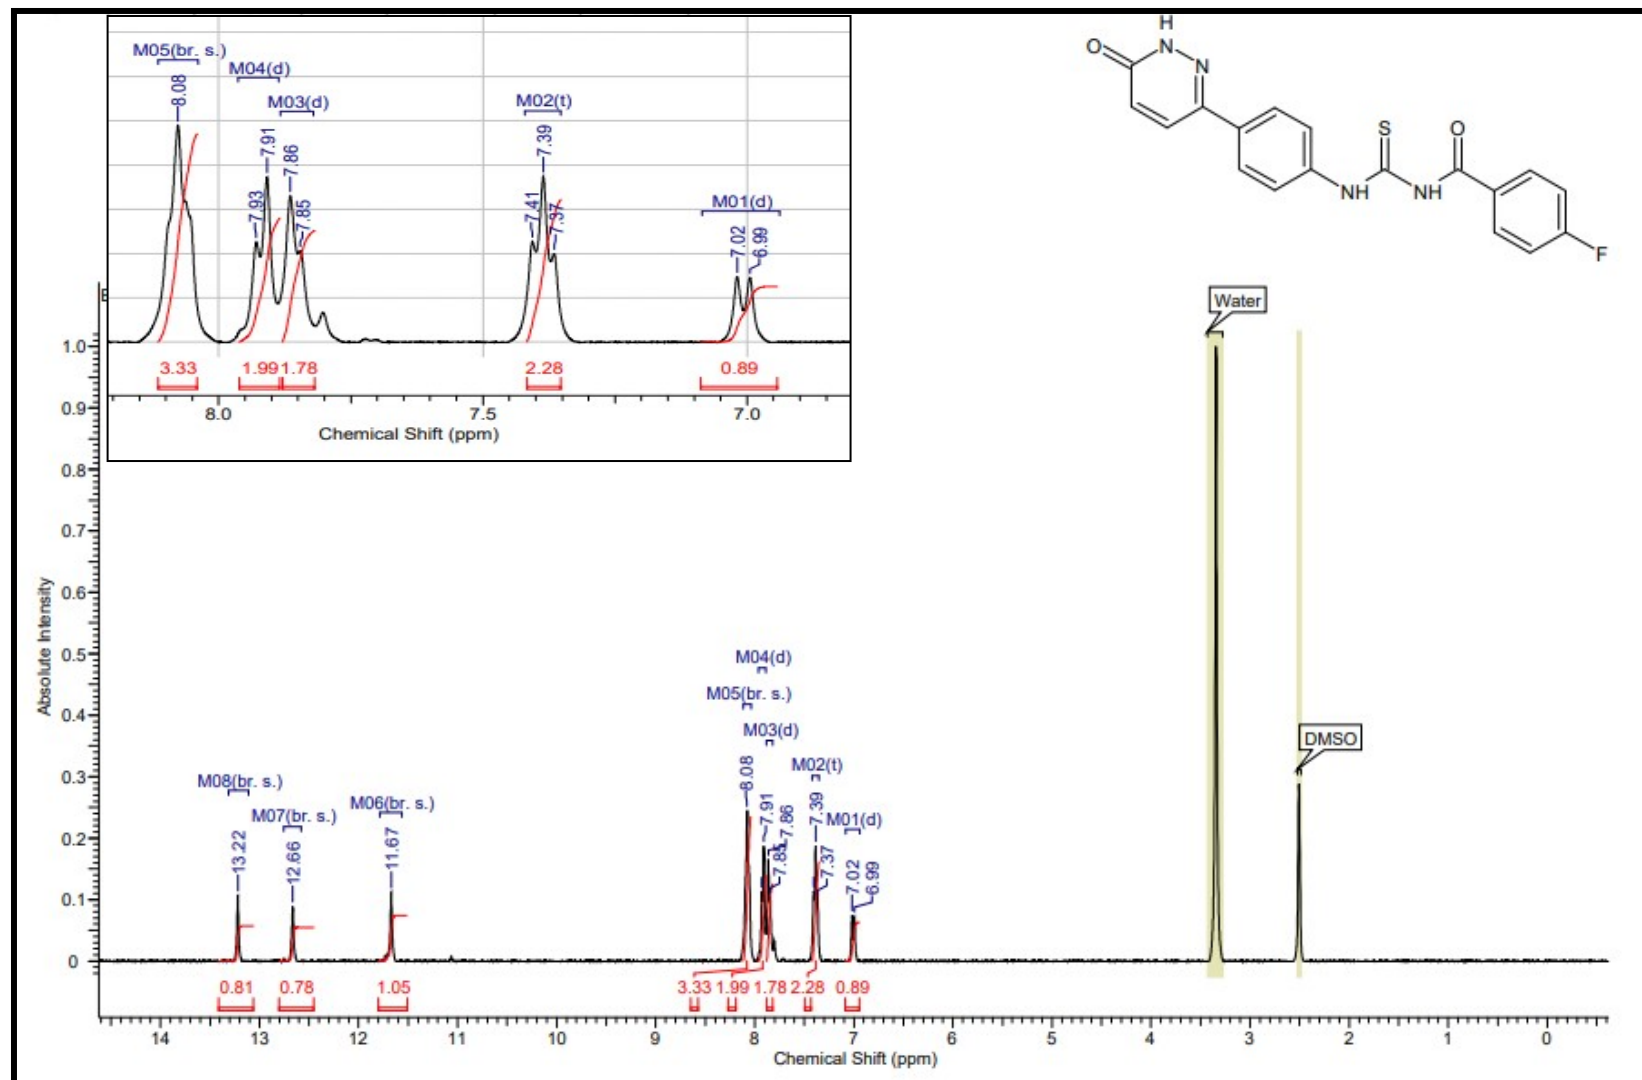

Figure 20a. <sup>1</sup>H NMR spectrum (400 MHz) of compound 10f in DMSO-d<sub>6</sub>.

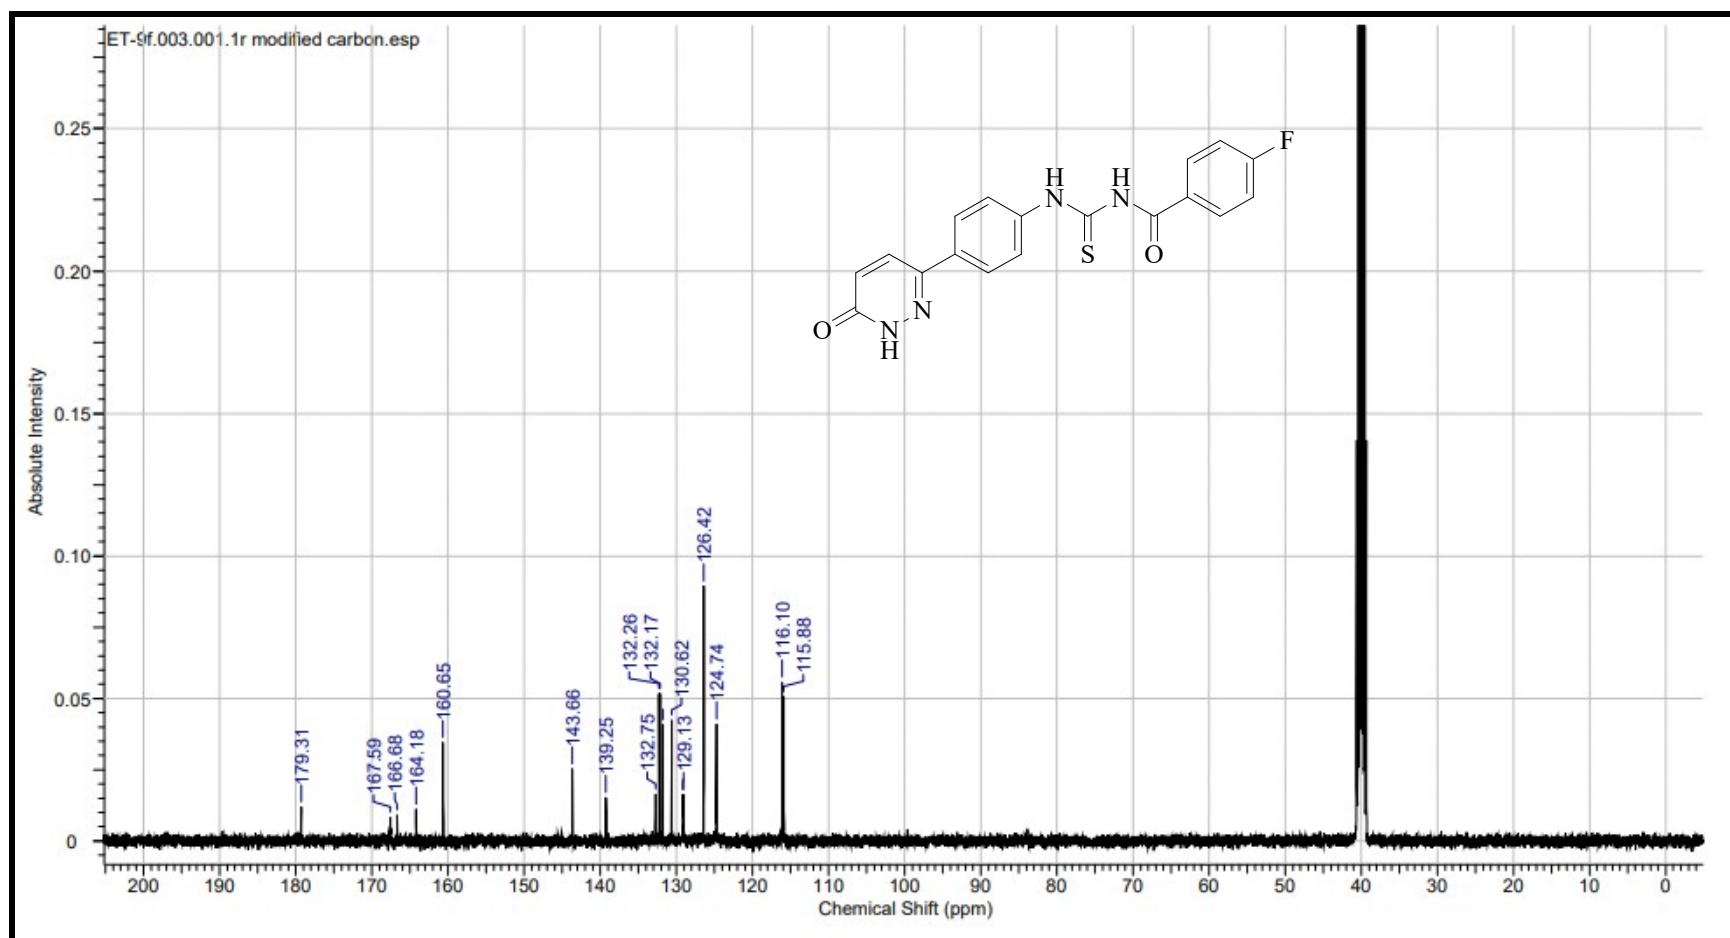

**Figure 20b.  $^{13}\text{C}$  NMR spectrum (100 MHz) of compound 10f in  $\text{DMSO-d}_6$ .**

### Single Mass Analysis

Tolerance = 3.0 PPM / DBE: min = -1.5, max = 15.0

Element prediction: Off

Number of isotope peaks used for i-FIT = 3

Monoisotopic Mass, Even Electron Ions

384 formula(e) evaluated with 1 results within limits (up to 50 closest results for each mass)

Elements Used:

C: 0-30 H: 0-30 N: 0-5 O: 0-5 F: 0-1 S: 0-1

ET-9f-HRESI/AJ

SYNAPTG2-Si#NotSet

22-Feb-2023

67551

14:36:11

0505A 603 (1.204) Cm (602:612)

1: TOF MS ES+

4.81e+004

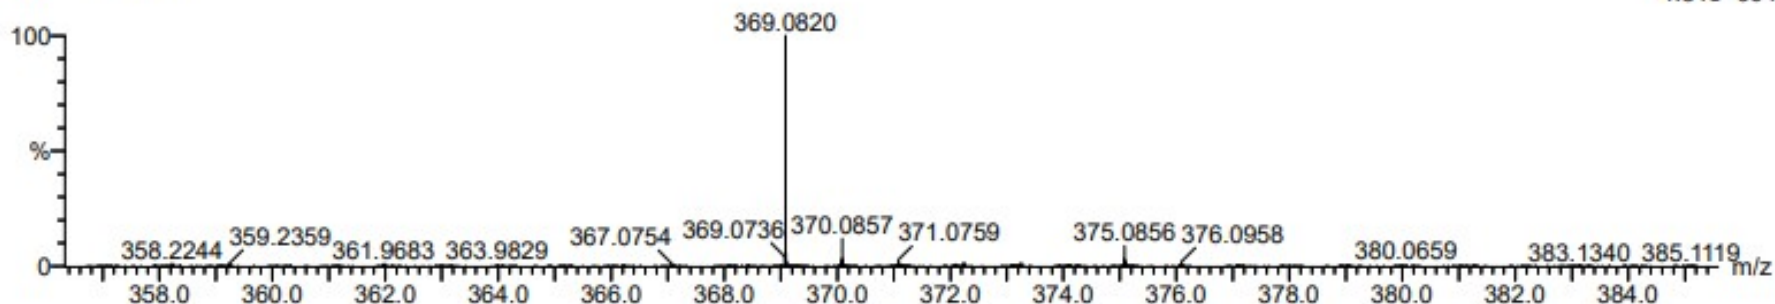

Minimum: -1.5  
Maximum: 5.0 3.0 15.0

| Mass     | Calc. Mass | mDa  | PPM  | DBE  | i-FIT | Formula           |
|----------|------------|------|------|------|-------|-------------------|
| 369.0820 | 369.0821   | -0.1 | -0.3 | 13.5 | 842.1 | C18 H14 N4 O2 F S |

Figure 20c. HRMS of compound 10f.

### 3.7. Compound 10g

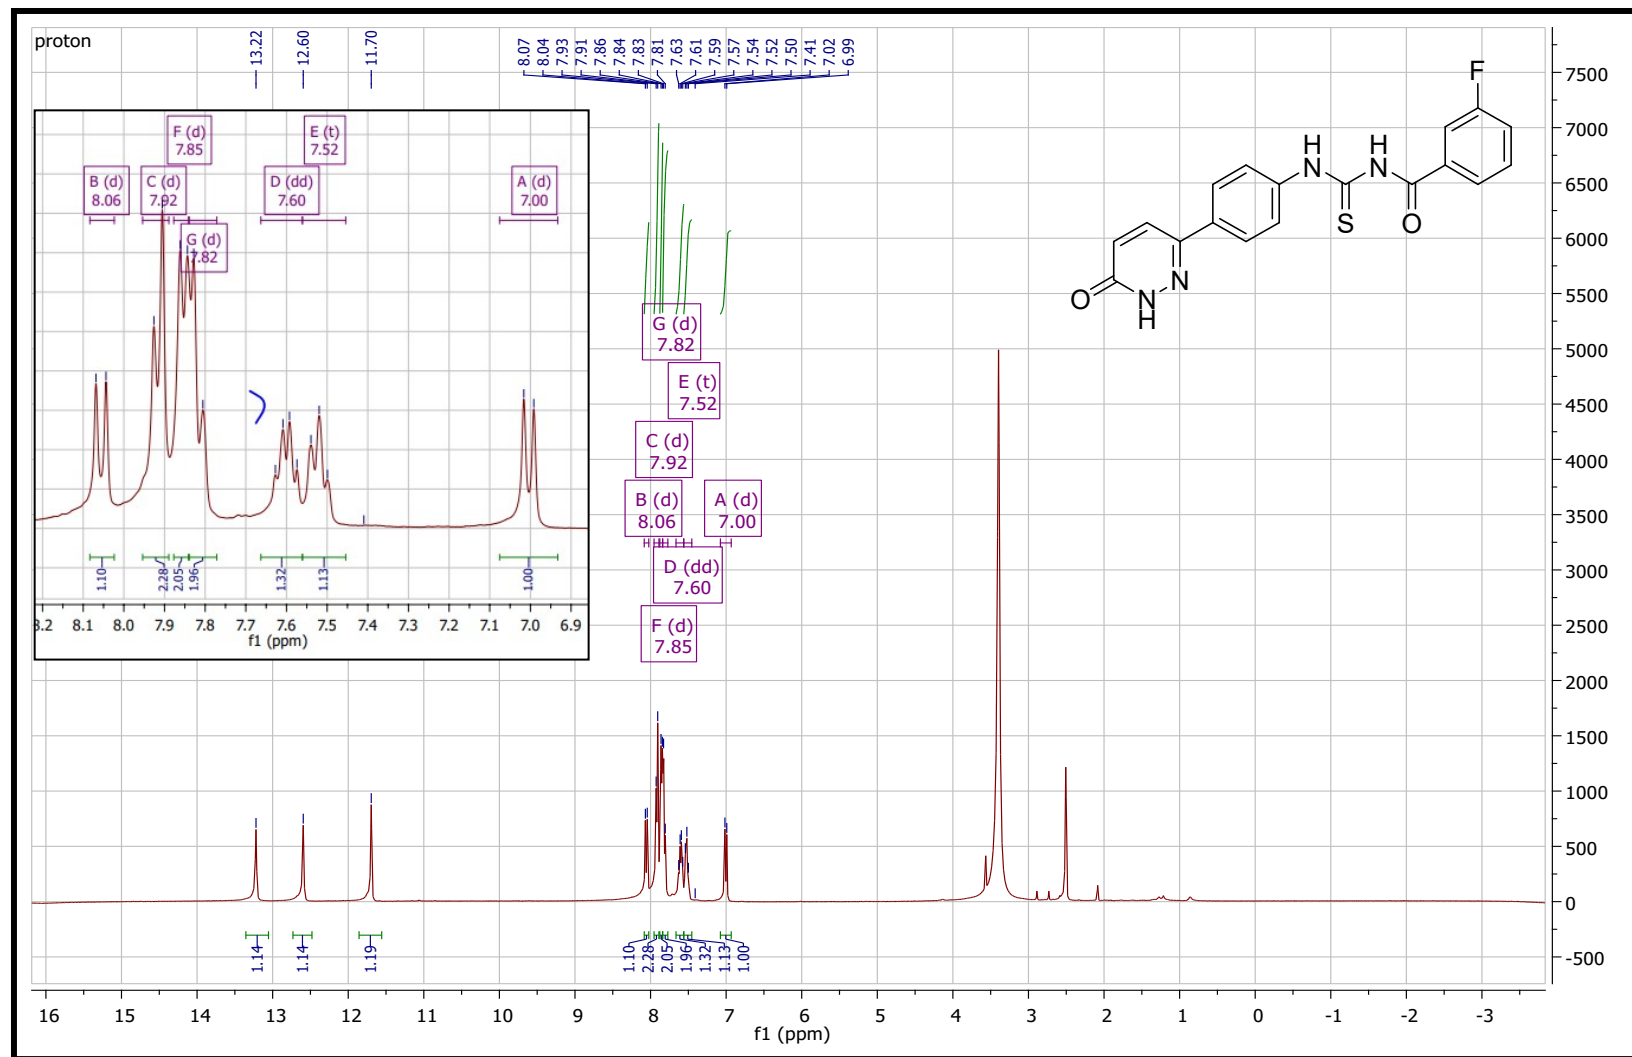

Figure 21a.  $^1\text{H}$  NMR spectrum (400 MHz) of compound 10g in  $\text{DMSO-d}_6$ .

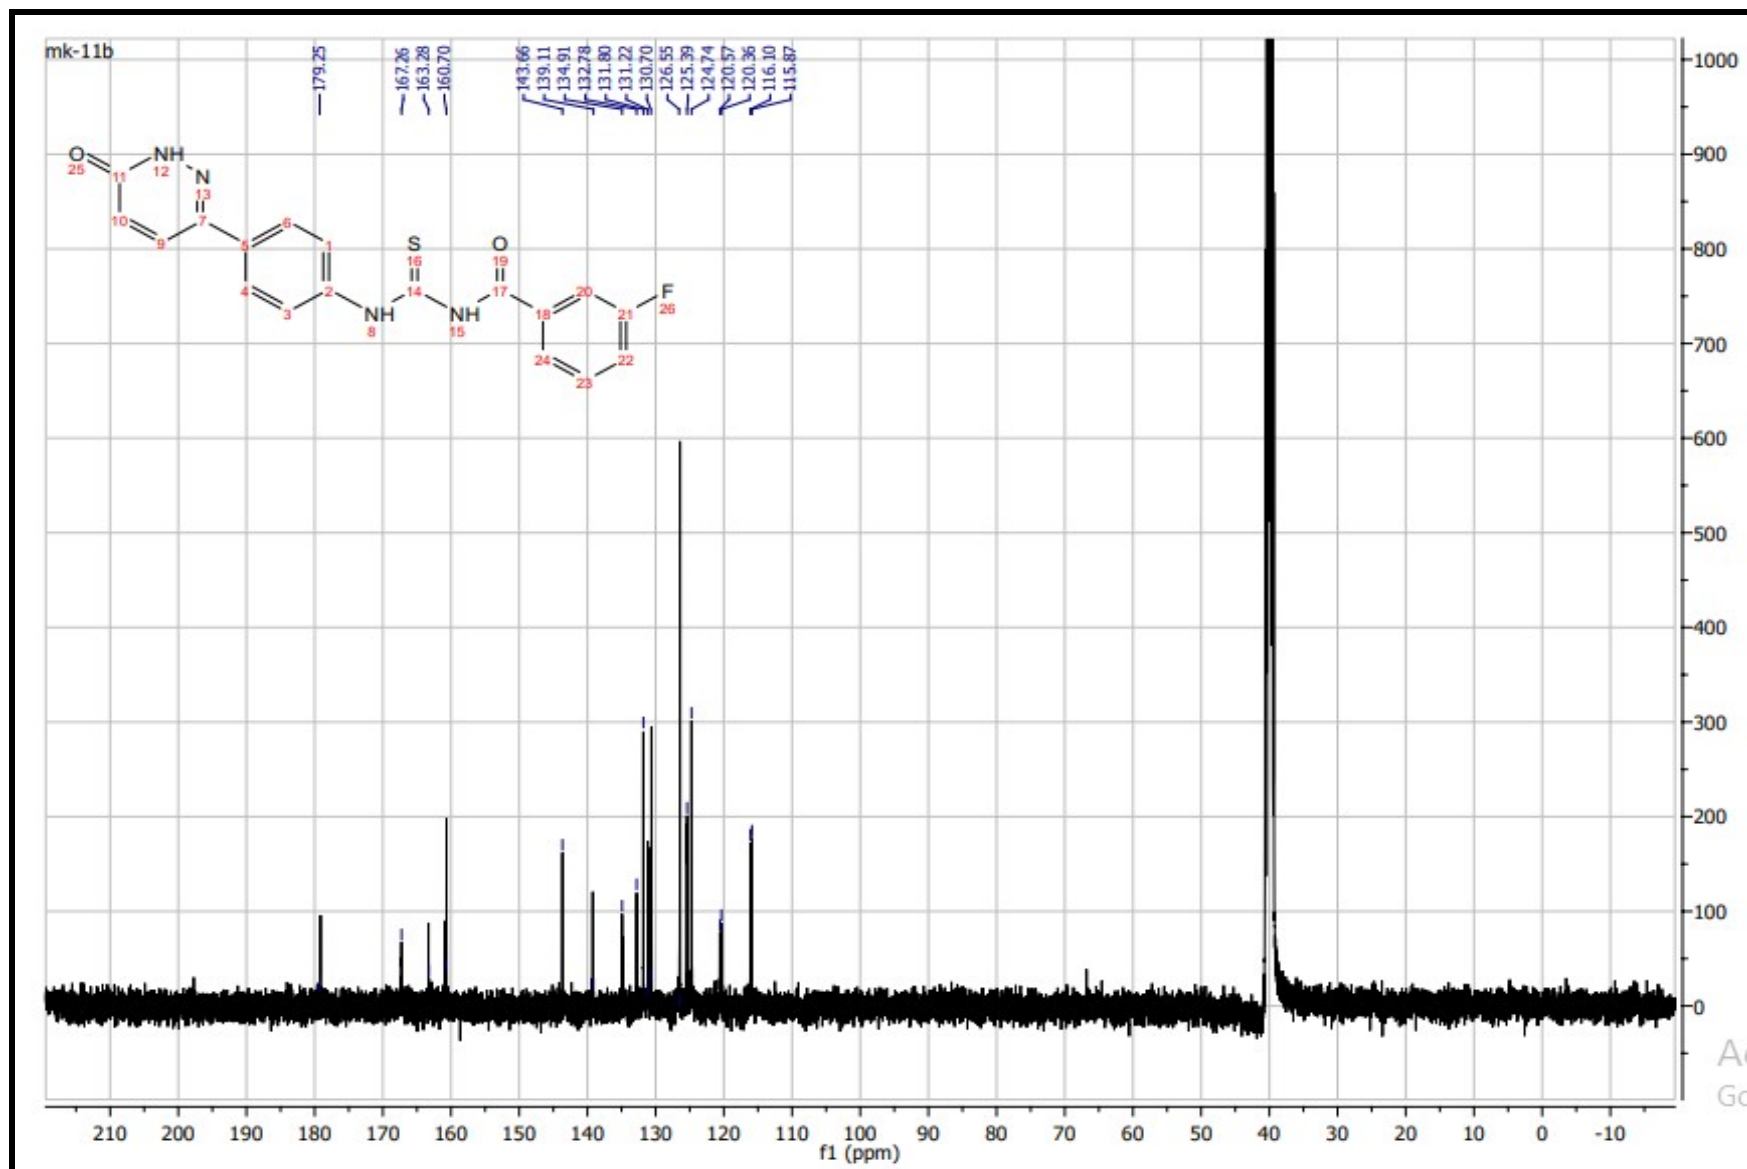

**Figure 21b. <sup>13</sup>C NMR spectrum (100 MHz) of compound 10g in DMSO-d<sub>6</sub>.**



### Single Mass Analysis

Tolerance = 3.0 PPM / DBE: min = -1.5, max = 15.0

Element prediction: Off

Number of isotope peaks used for i-FIT = 3

Monoisotopic Mass, Even Electron Ions

384 formula(e) evaluated with 1 results within limits (up to 50 closest results for each mass)

Elements Used:

C: 0-30 H: 0-30 N: 0-5 O: 0-5 F: 0-1 S: 0-1

ET-9g-HRESI/AJ

SYNAPT2-Si#NotSet

21-Feb-2023

67552

15:35:47

0506 1429 (2.852) Cm (1426:1446)

1: TOF MS ES+

2.93e+005

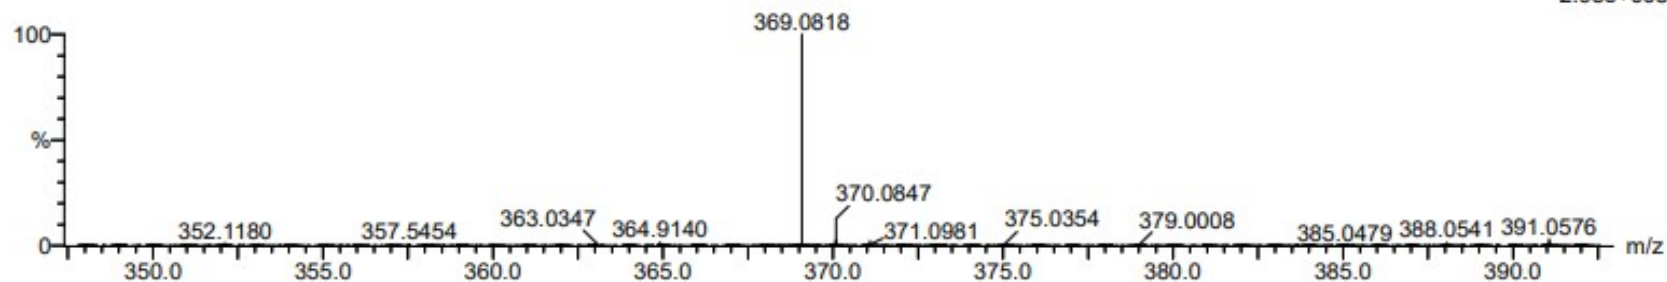

Minimum: -1.5  
Maximum: 5.0 3.0 15.0

| Mass     | Calc. Mass | mDa  | PPM  | DBE  | i-FIT  | Formula           |
|----------|------------|------|------|------|--------|-------------------|
| 369.0818 | 369.0821   | -0.3 | -0.8 | 13.5 | 1405.0 | C18 H14 N4 O2 F S |

Figure 21c. HRMS of compound 10g.

### 3.8. Compound 10h

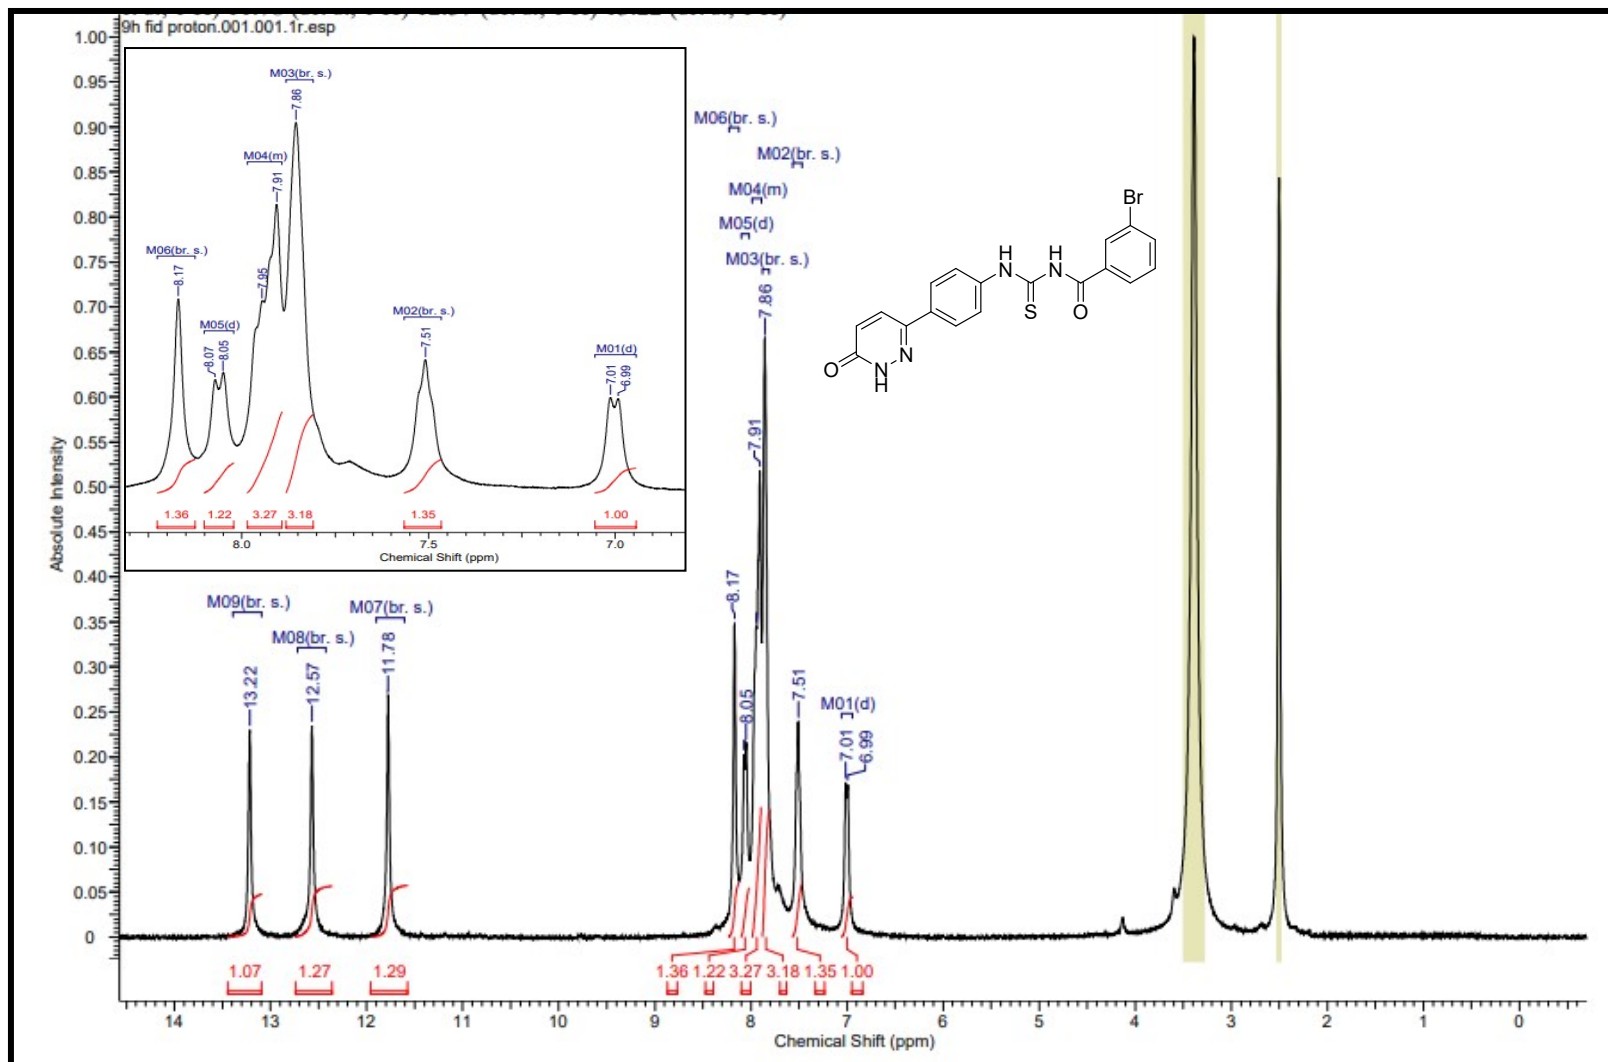

Figure 22a. <sup>1</sup>H NMR spectrum (400 MHz) of compound 10h in DMSO-d<sub>6</sub>.

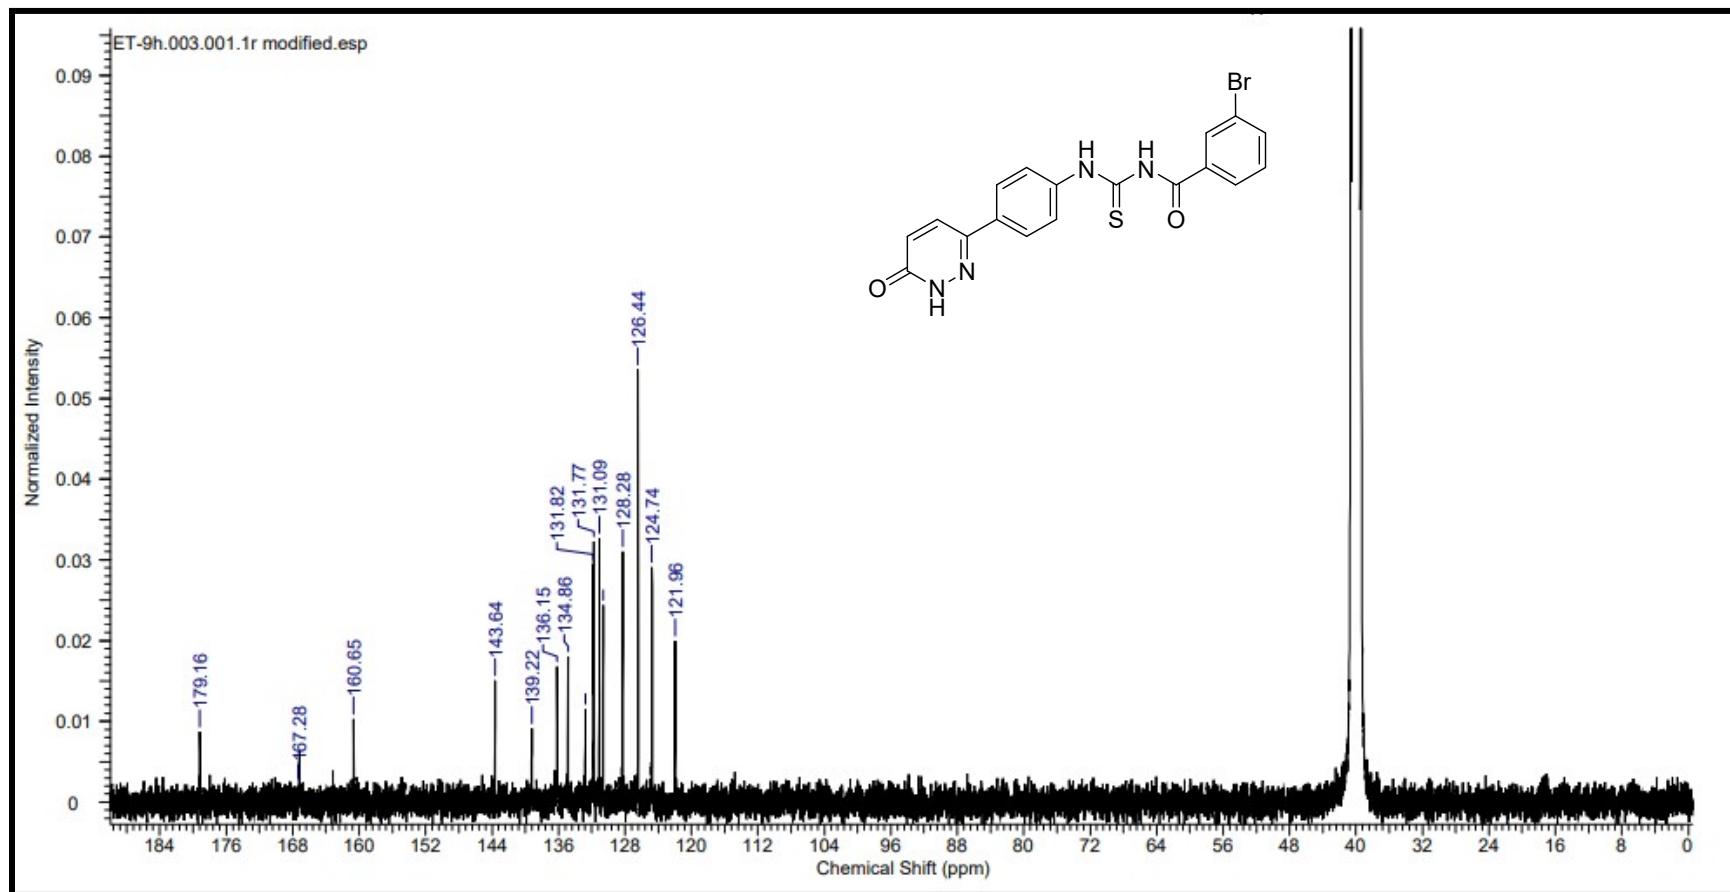

**Figure 22b.**  $^{13}\text{C}$  NMR spectrum (100 MHz) of compound 10h in  $\text{DMSO-d}_6$ .

### Single Mass Analysis

Tolerance = 3.0 PPM / DBE: min = -1.5, max = 14.0

Element prediction: Off

Number of isotope peaks used for i-FIT = 3

Monoisotopic Mass, Even Electron Ions

503 formula(e) evaluated with 1 results within limits (up to 50 closest results for each mass)

Elements Used:

C: 0-30 H: 0-20 N: 0-5 O: 0-5 S: 0-1 79Br: 0-1 81Br: 0-1

ET-9h-HRESI/AJ

SYNAPTG2-Si#NotSet

21-Feb-2023

67553

15:50:12

0508A 220 (0.450) Cm (213:230)

1: TOF MS ES+

4.05e+04

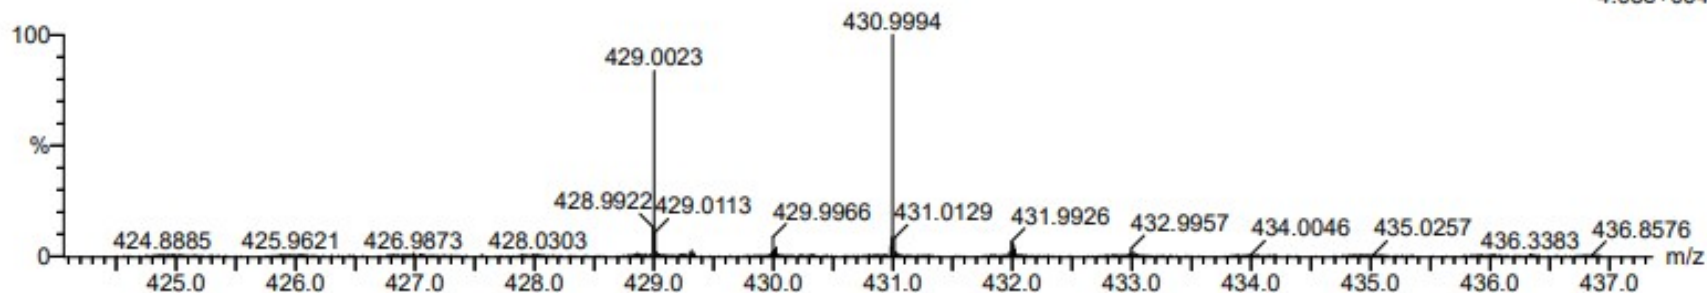

Minimum: -1.5  
Maximum: 5.0 3.0 14.0

| Mass     | Calc. Mass | mDa | PPM | DBE  | i-FIT  | Formula              |
|----------|------------|-----|-----|------|--------|----------------------|
| 429.0023 | 429.0021   | 0.2 | 0.5 | 13.5 | 1469.3 | C18 H14 N4 O2 S 79Br |

**Figure 22c. HRMS of compound 10h.**

### 3.9. Compound 10i

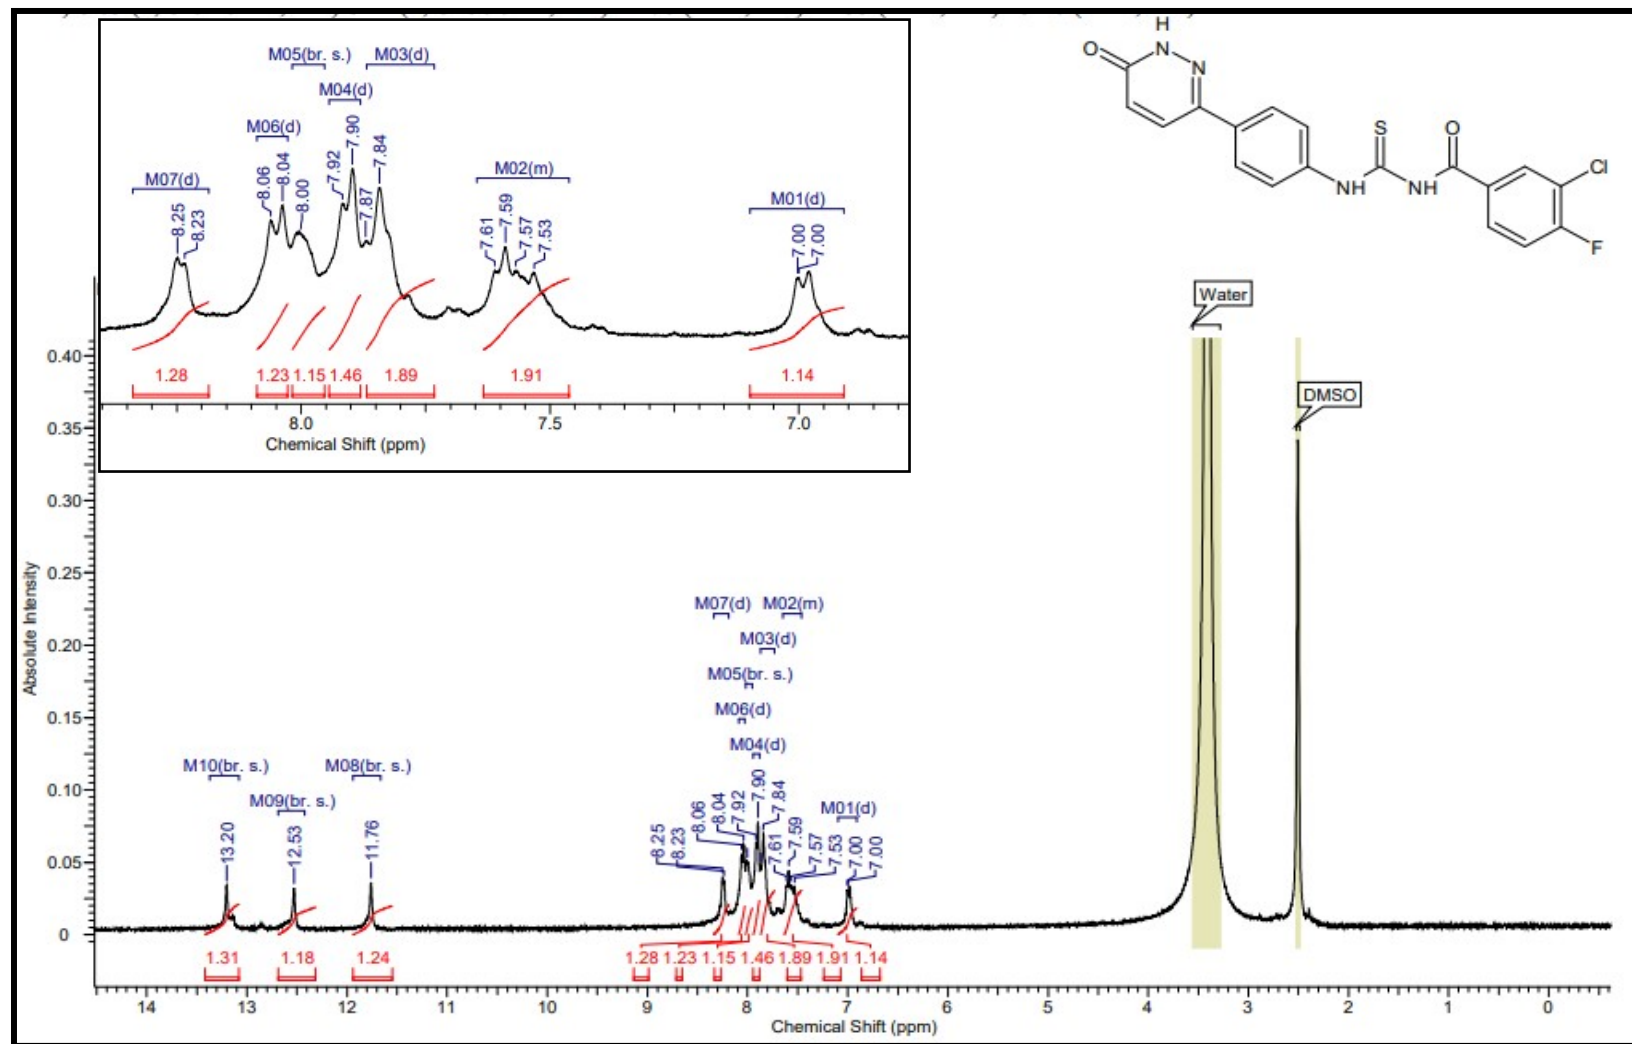

Figure 23a. <sup>1</sup>H NMR spectrum (400 MHz) of compound 10i in DMSO-d<sub>6</sub>.

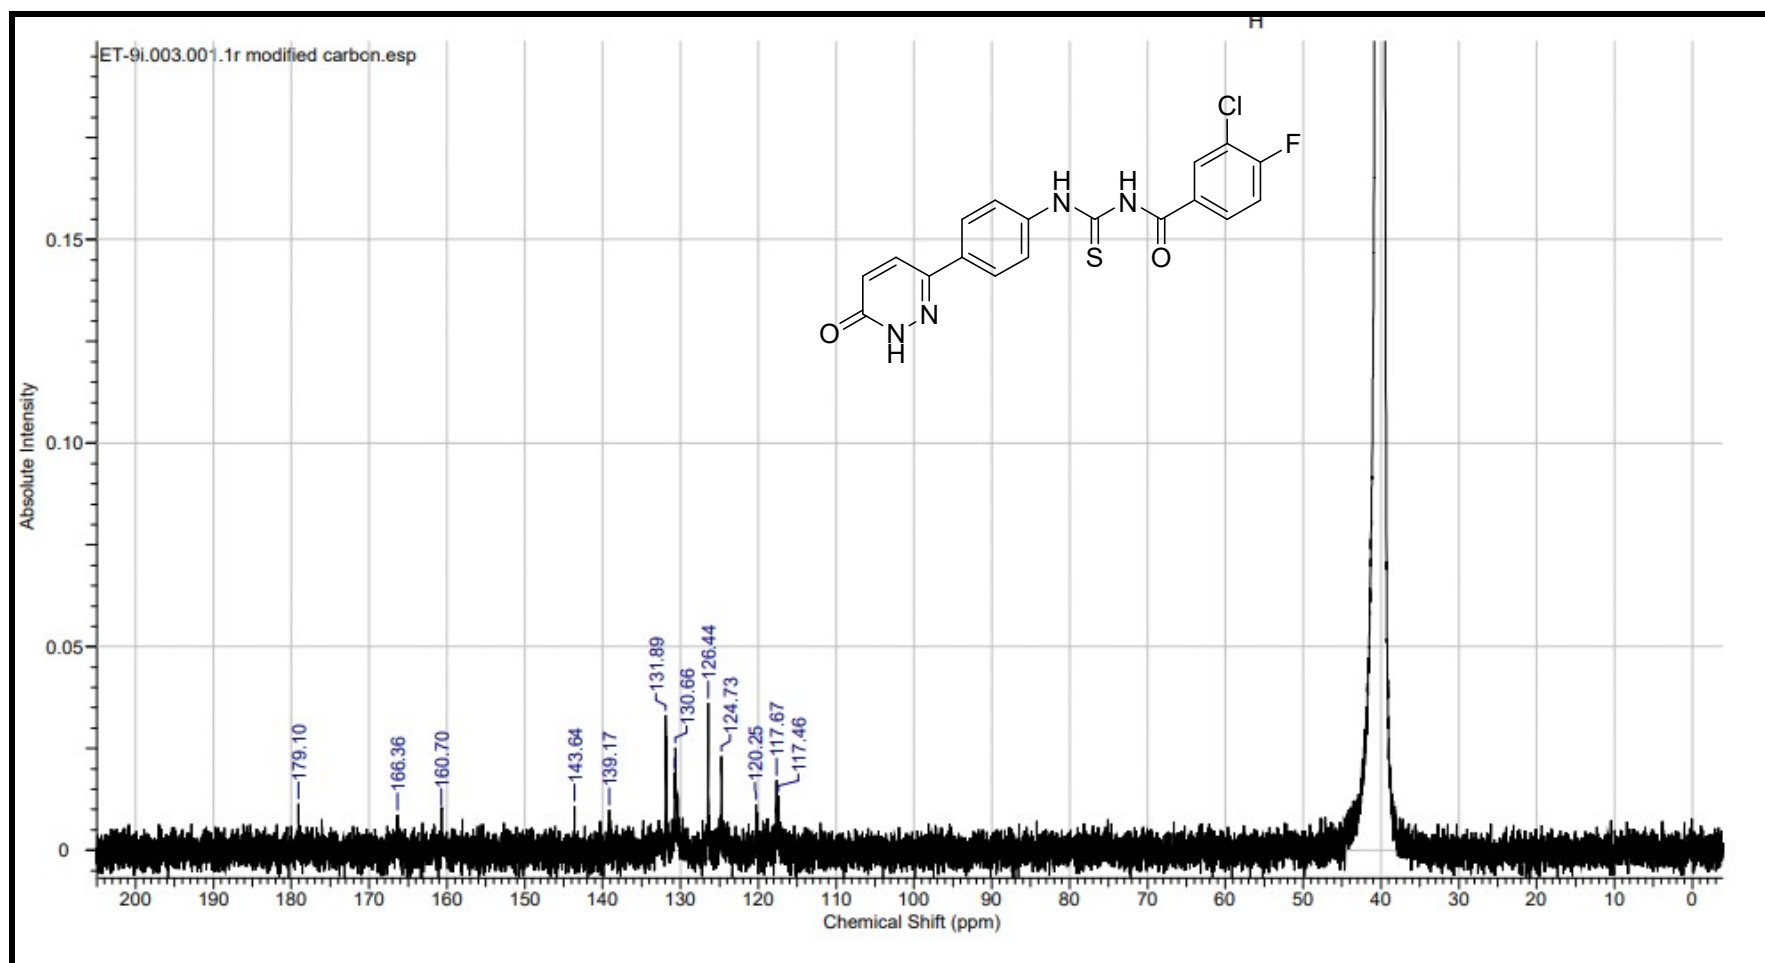

Figure 23b.  $^{13}\text{C}$  NMR spectrum (100 MHz) of compound 10i in  $\text{DMSO-d}_6$ .

### Single Mass Analysis

Tolerance = 3.0 PPM / DBE: min = -1.5, max = 14.0

Element prediction: Off

Number of isotope peaks used for i-FIT = 3

Monoisotopic Mass, Even Electron Ions

516 formula(e) evaluated with 1 results within limits (up to 50 closest results for each mass)

Elements Used:

C: 0-30 H: 0-20 N: 0-5 O: 0-2 S: 0-1 F: 0-1 <sup>35</sup>Cl: 0-1 <sup>37</sup>Cl: 0-1

ET-9i-HRESI/AJ

SYNAPT G2-Si#NotSet

22-Feb-2023

67554

11:17:04

0511 689 (1.372) Cm (664:696)

1: TOF MS ES+

9.04e+005

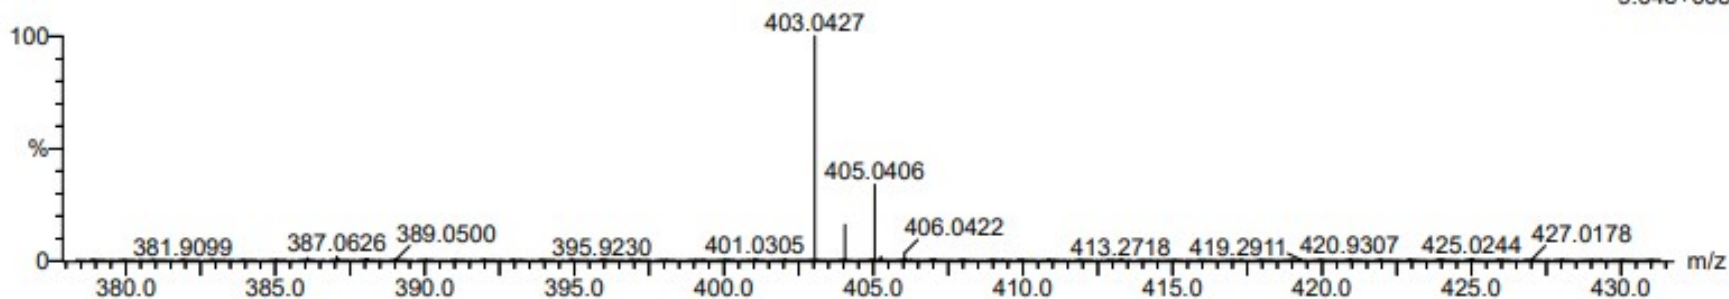

Minimum: -1.5  
Maximum: 5.0 3.0 14.0

| Mass     | Calc. Mass | mDa  | PPM  | DBE  | i-FIT  | Formula                |
|----------|------------|------|------|------|--------|------------------------|
| 403.0427 | 403.0432   | -0.5 | -1.2 | 13.5 | 2251.1 | C18 H13 N4 O2 S F 35Cl |

Figure 23c. HRMS of compound 10i.

### 3.10. Compound 10j

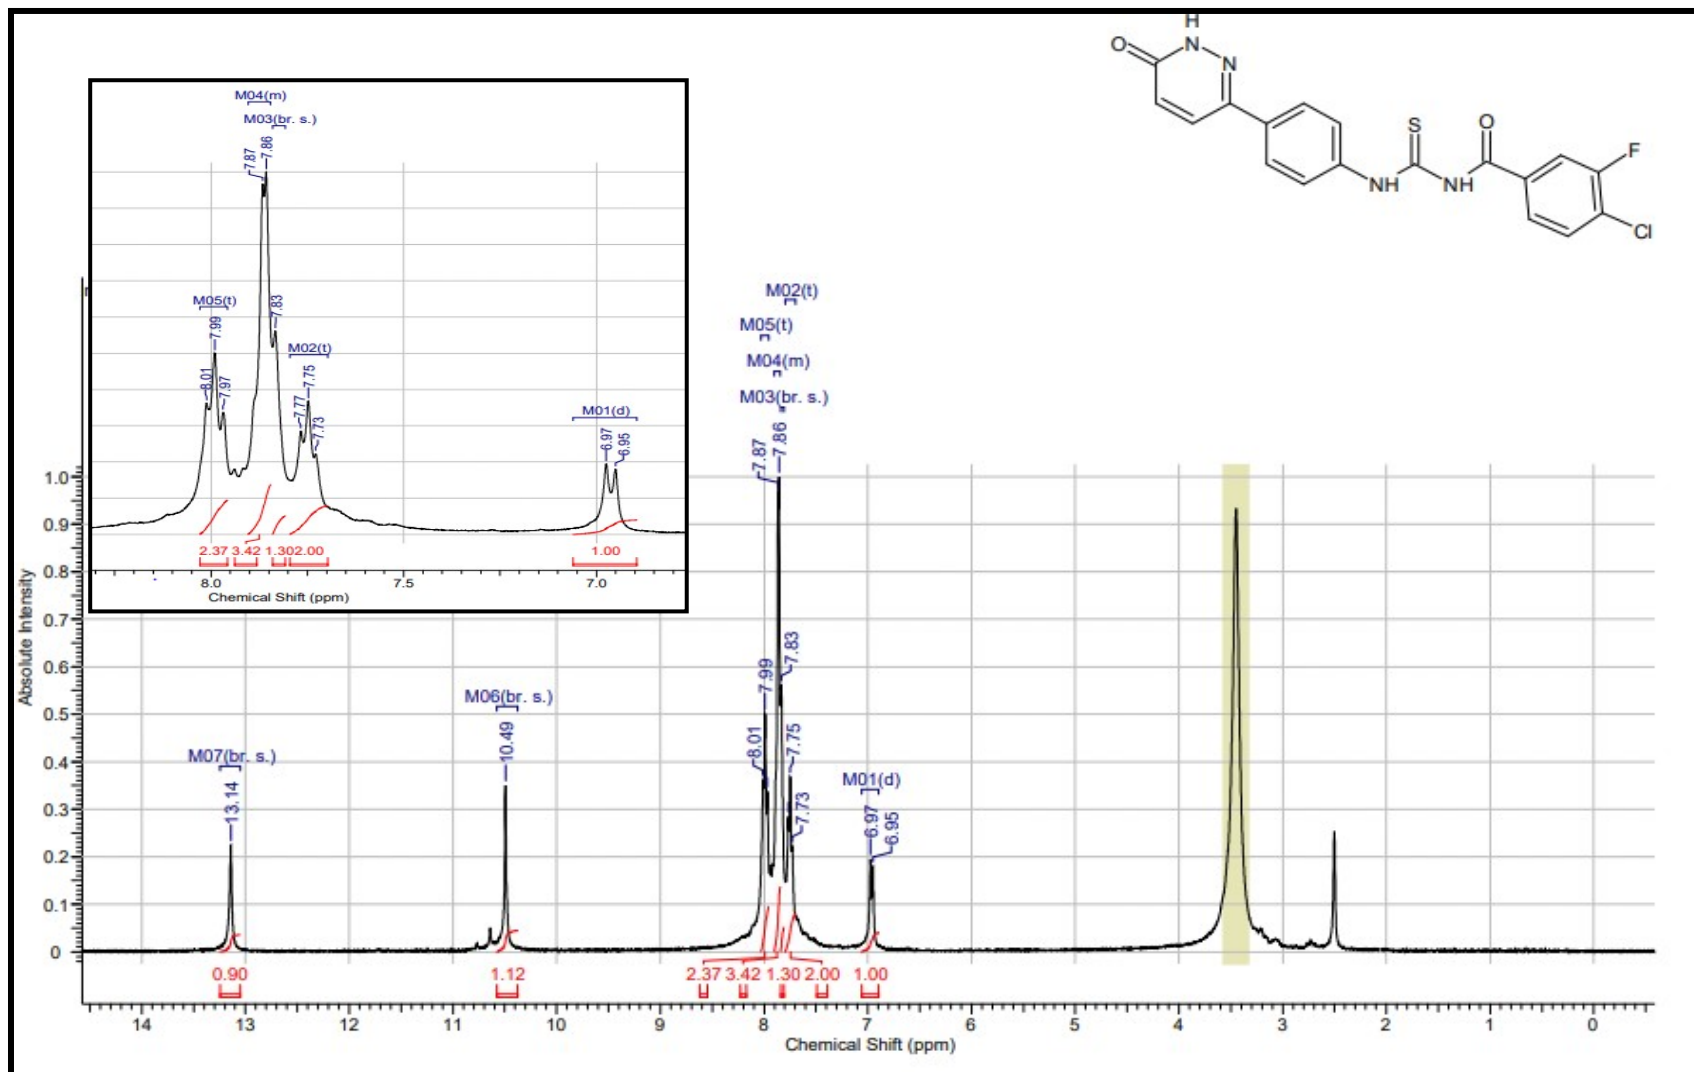

Figure 24a. <sup>1</sup>H NMR spectrum (400 MHz) of compound 10j in DMSO-d<sub>6</sub>.



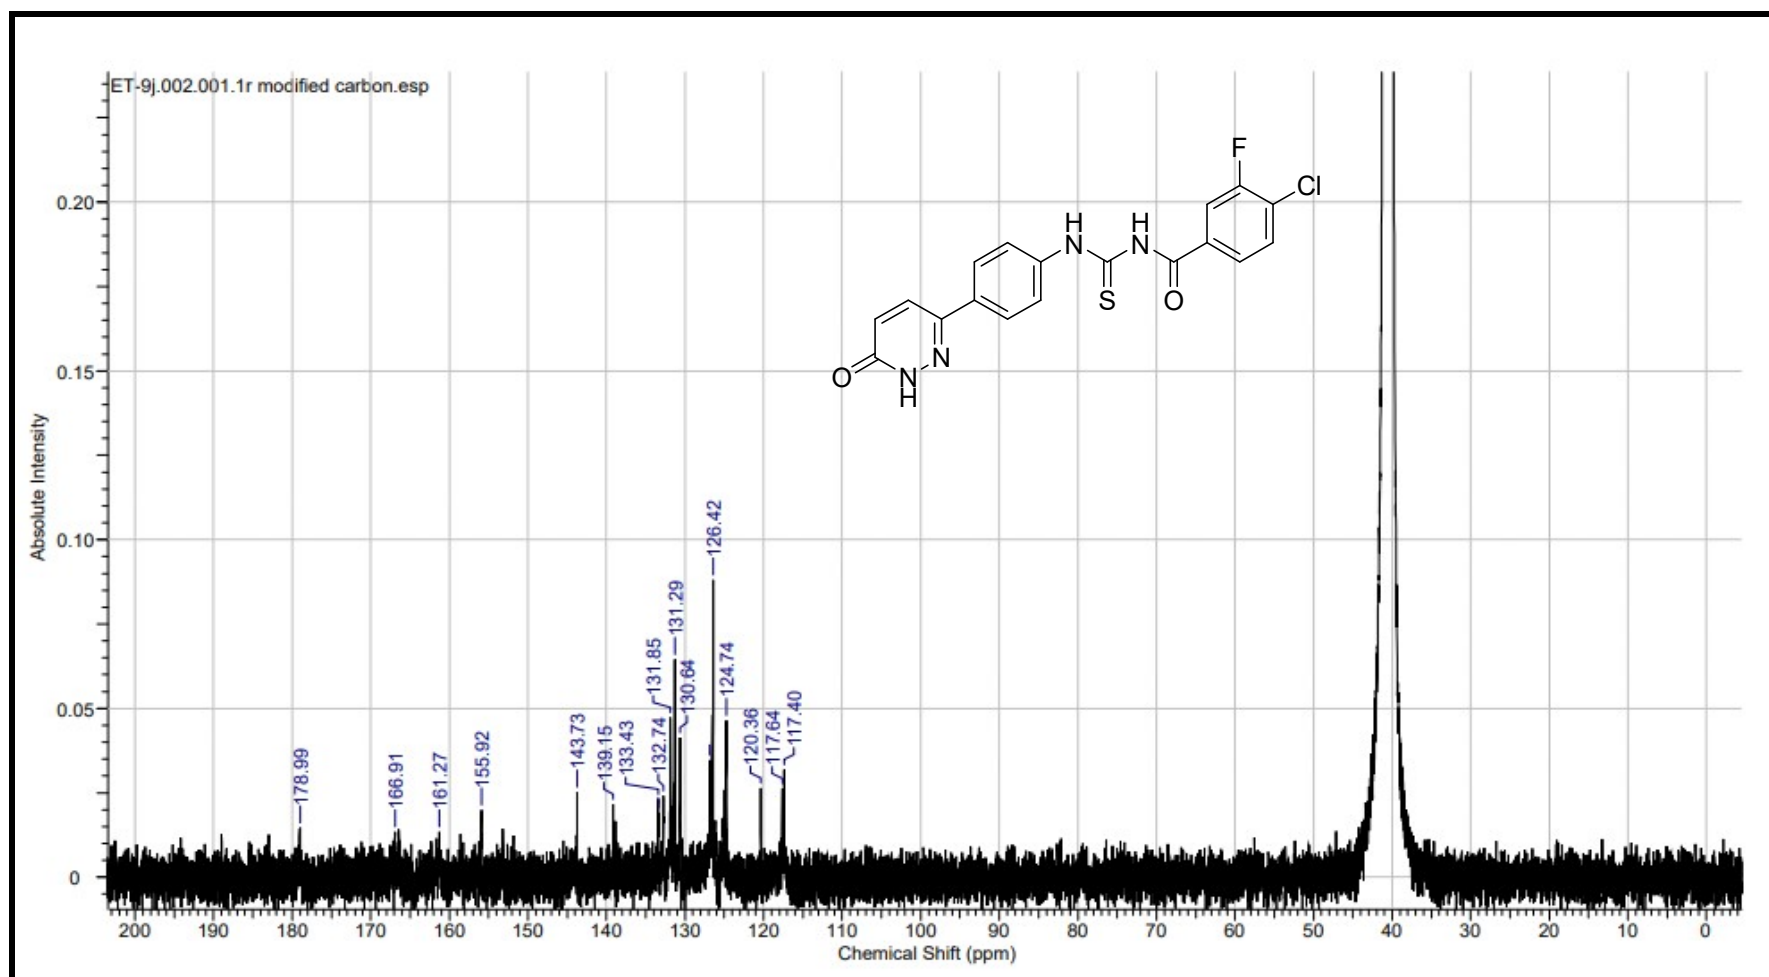

Figure 24b.  $^{13}\text{C}$  NMR spectrum (100 MHz) of compound 10j in  $\text{DMSO-d}_6$ .

### Single Mass Analysis

Tolerance = 3.0 PPM / DBE: min = -1.5, max = 14.0

Element prediction: Off

Number of isotope peaks used for i-FIT = 3

Monoisotopic Mass, Even Electron Ions

422 formula(e) evaluated with 1 results within limits (up to 50 closest results for each mass)

Elements Used:

C: 0-30 H: 0-16 N: 0-5 O: 0-2 S: 0-1 F: 0-1 <sup>35</sup>Cl: 0-1 <sup>37</sup>Cl: 0-1

ET-9j-HRESI/AJ

SYNAPTG2-Si#NotSet

22-Feb-2023

67555

11:20:45

0512 1033 (2.046) Cm (1011:1035)

1: TOF MS ES+

1.06e+005

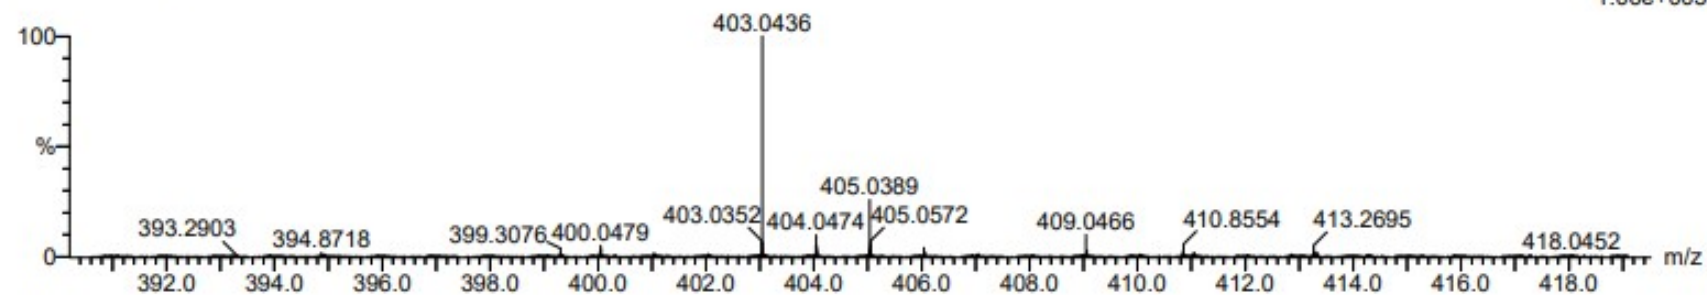

Minimum: -1.5

Maximum: 5.0 3.0 14.0

| Mass     | Calc. Mass | mDa | PPM | DBE  | i-FIT  | Formula                |
|----------|------------|-----|-----|------|--------|------------------------|
| 403.0436 | 403.0432   | 0.4 | 1.0 | 13.5 | 1728.7 | C18 H13 N4 O2 S F 35Cl |

Figure 24c. HRMS of compound 10j.

### 3.11. Compound 10k

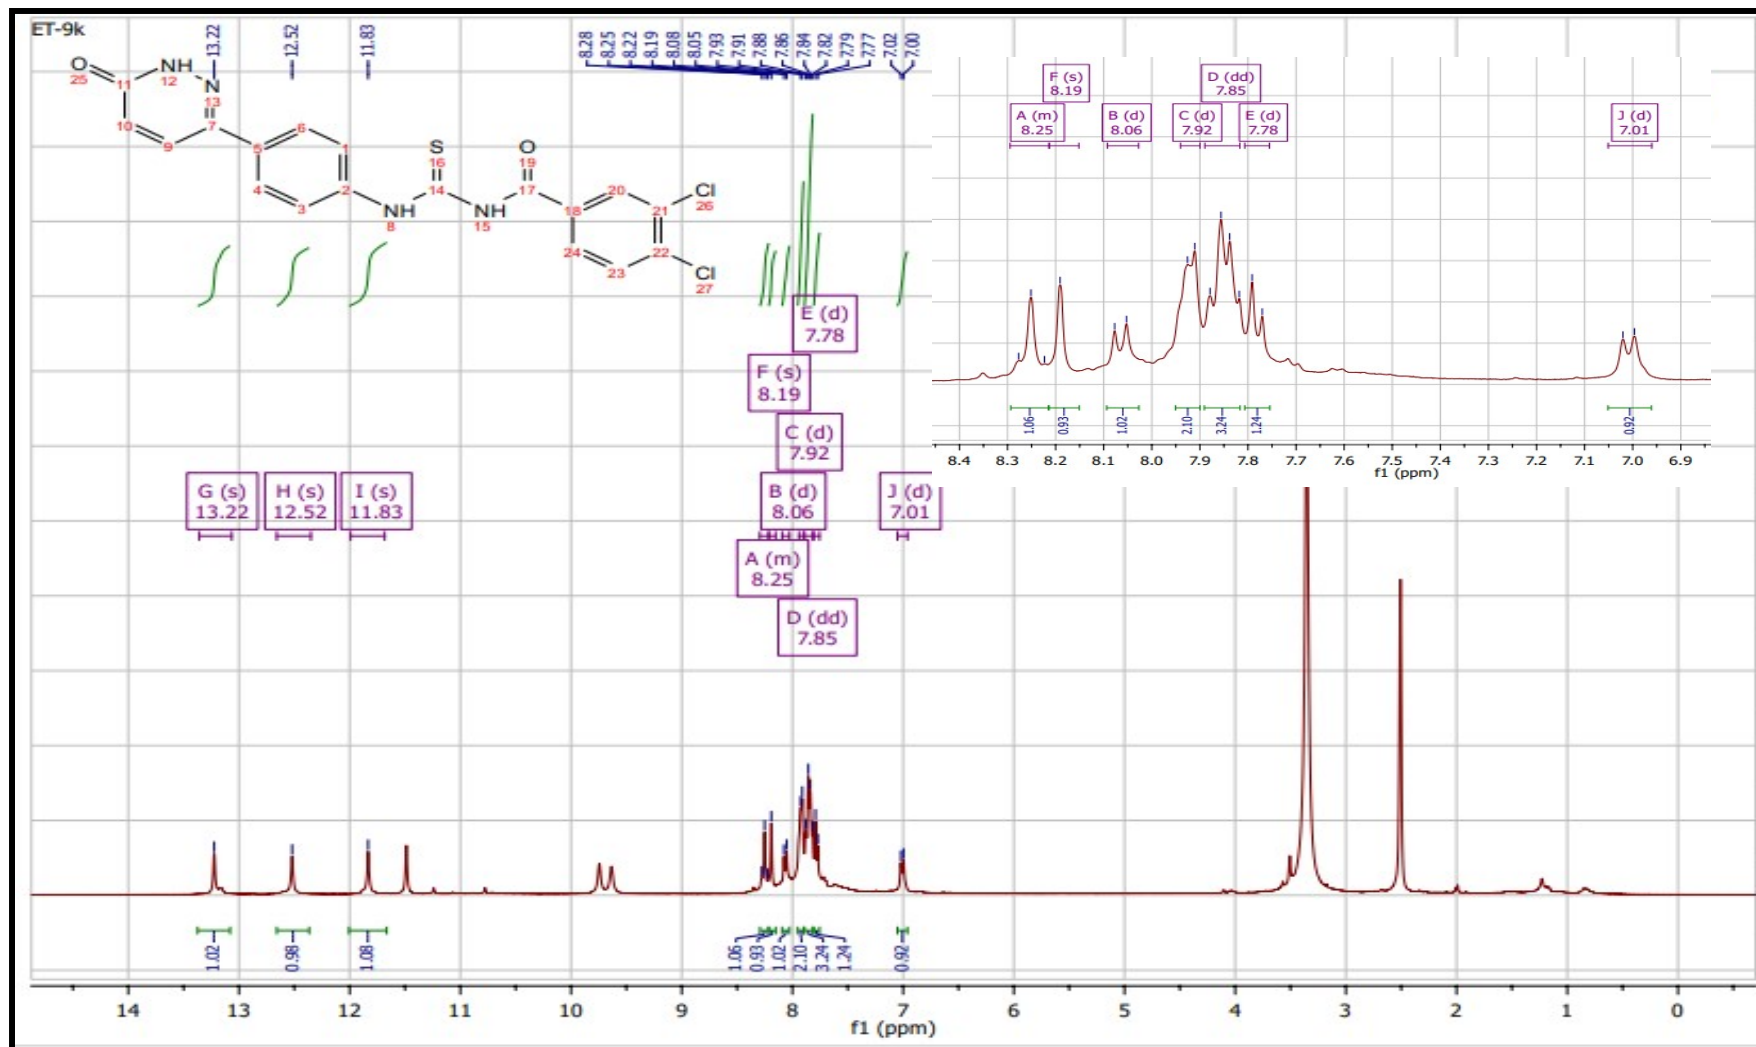

Figure 25a. <sup>1</sup>H NMR spectrum (400 MHz) of compound 10k in DMSO-d<sub>6</sub>.

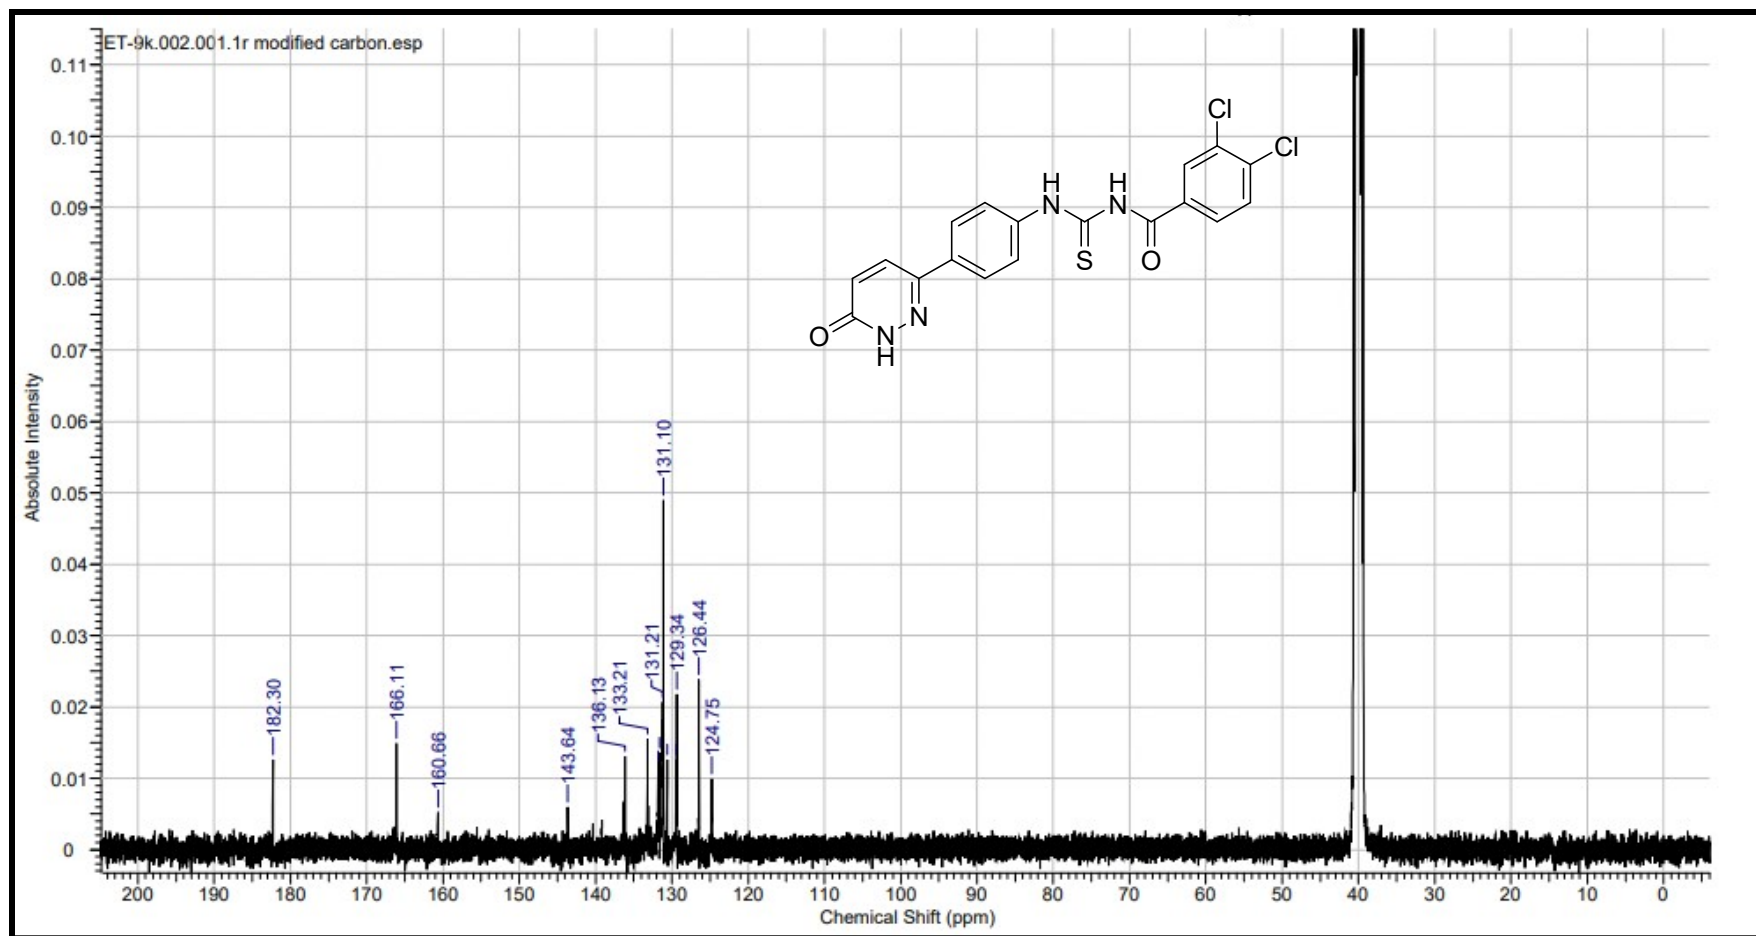

**Figure 25b.  $^{13}\text{C}$  NMR spectrum (100 MHz) of compound 10k in  $\text{DMSO-d}_6$ .**

### Single Mass Analysis

Tolerance = 3.0 PPM / DBE: min = -1.5, max = 14.0

Element prediction: Off

Number of isotope peaks used for i-FIT = 3

Monoisotopic Mass, Even Electron Ions

195 formula(e) evaluated with 1 results within limits (up to 50 closest results for each mass)

Elements Used:

C: 0-30 H: 0-20 N: 3-5 O: 0-2 S: 0-1 35Cl: 0-2 37Cl: 0-1

ET-9K/AJ

SYNAPT G2-Si#NotSet

27-Feb-2023

67556

11:14:44

0562A 1291 (2.552) Cm (1242:1346)

1: TOF MS ES+

4.44e+006

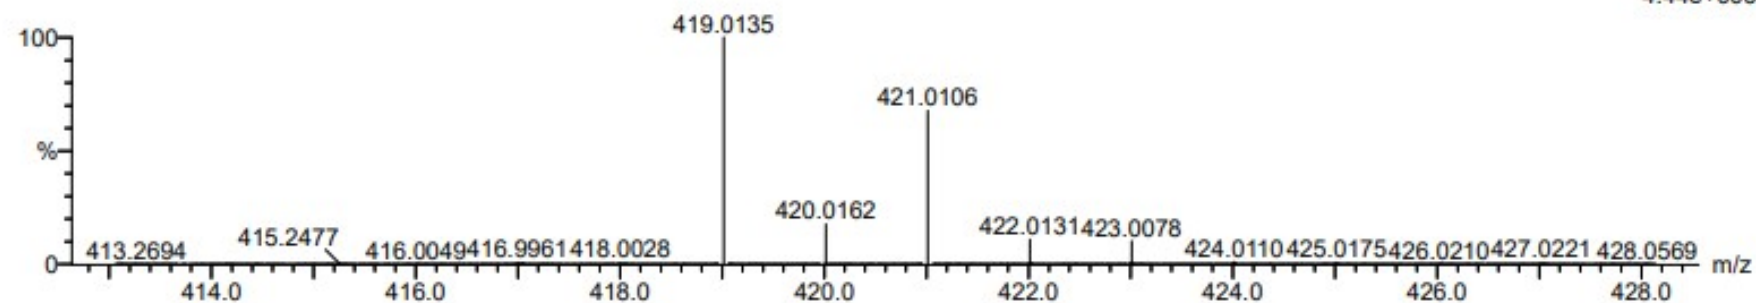

Minimum: -1.5  
Maximum: 5.0 3.0 14.0

| Mass     | Calc. Mass | mDa  | PPM  | DBE  | i-FIT  | Formula               |
|----------|------------|------|------|------|--------|-----------------------|
| 419.0135 | 419.0136   | -0.1 | -0.2 | 13.5 | 3260.7 | C18 H13 N4 O2 S 35Cl2 |

Figure 25c. HRMS of compound 10k.

### 3.12. Compound 10I

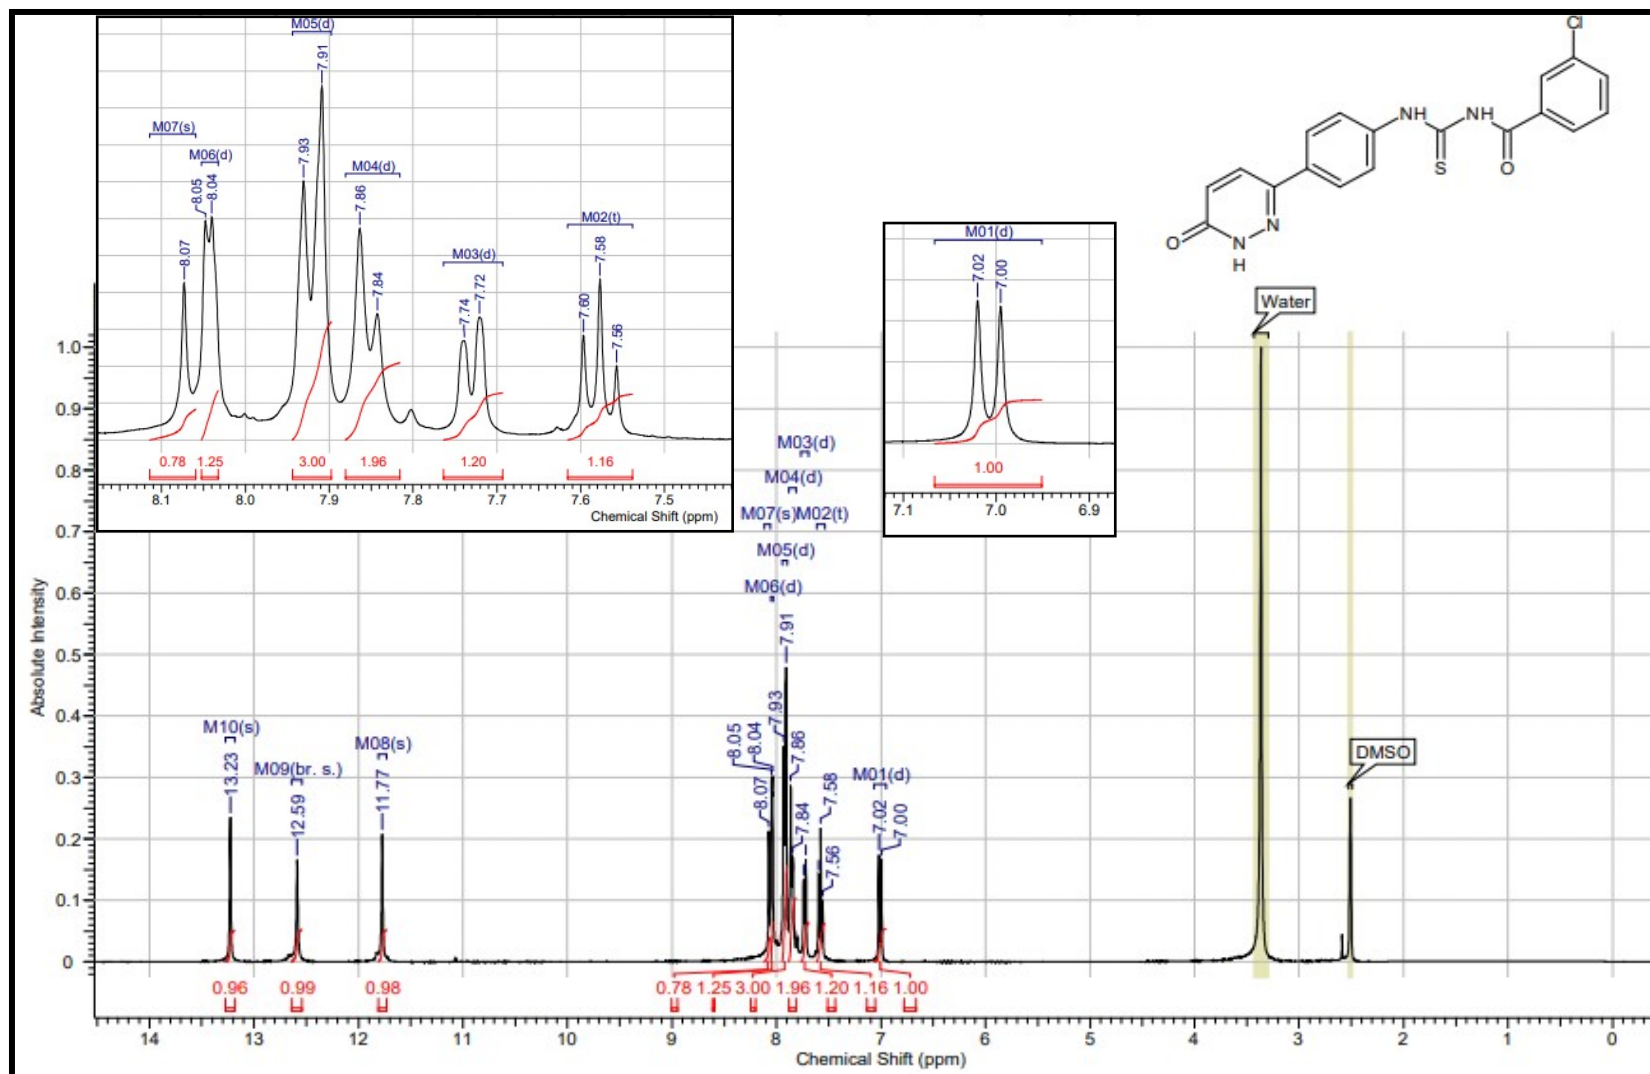

Figure 26a.  $^1\text{H}$  NMR spectrum (400 MHz) of compound 10I in  $\text{DMSO-d}_6$ .

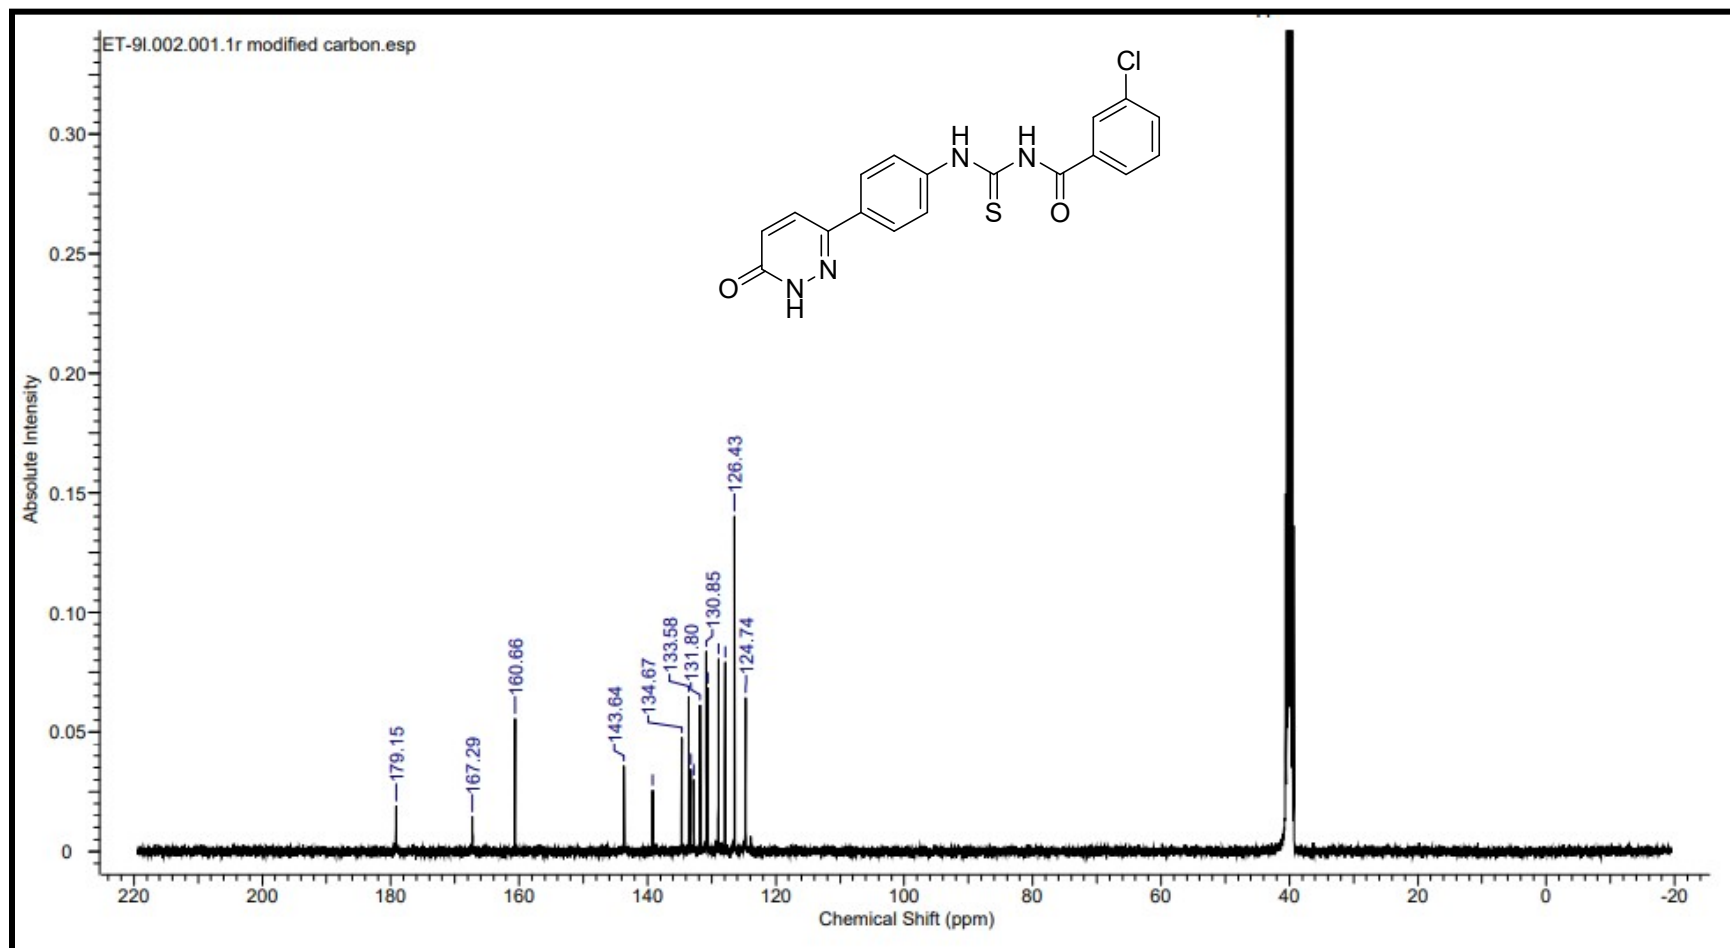

**Figure 26b.**  $^{13}\text{C}$  NMR spectrum (100 MHz) of compound 10I in  $\text{DMSO-d}_6$ .

### Single Mass Analysis

Tolerance = 3.0 PPM / DBE: min = -1.5, max = 14.0

Element prediction: Off

Number of isotope peaks used for i-FIT = 3

Monoisotopic Mass, Even Electron Ions

298 formula(e) evaluated with 1 results within limits (up to 50 closest results for each mass)

Elements Used:

C: 0-30 H: 0-20 N: 3-5 O: 0-2 S: 0-1 35Cl: 0-2 37Cl: 0-2

ET-9M/AJ

SYNAPTG2-Si#NotSet

27-Feb-2023

67558

15:23:41

0564A 1378 (2.723) Cm (1351:1378)

1: TOF MS ES+

2.56e+005

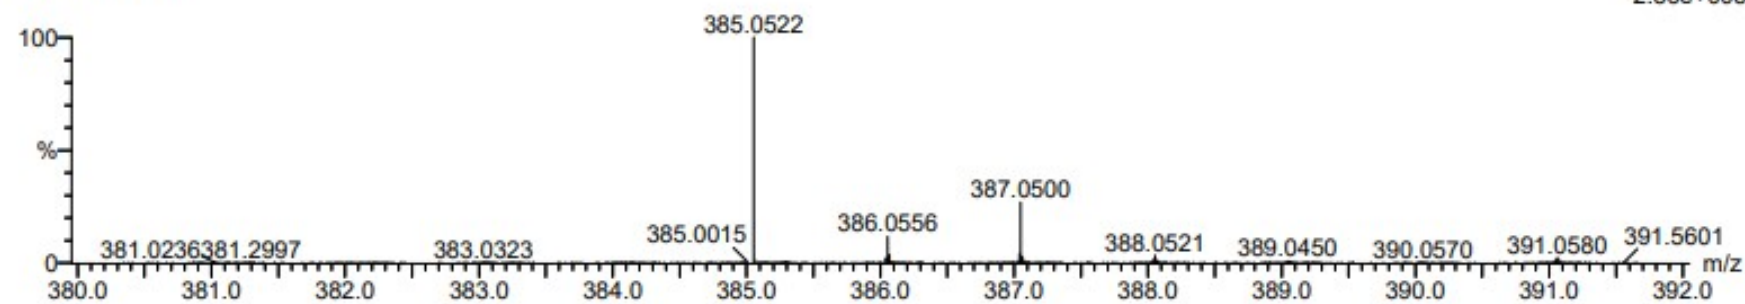

Minimum: -1.5  
Maximum: 5.0 3.0 14.0

| Mass     | Calc. Mass | mDa  | PPM  | DBE  | i-FIT  | Formula              |
|----------|------------|------|------|------|--------|----------------------|
| 385.0522 | 385.0526   | -0.4 | -1.0 | 13.5 | 1466.3 | C18 H14 N4 O2 S 35Cl |

Figure 26c. HRMS of compound 10l.



## 4. Spectral data of series IV

### 4.1. Compound 11a

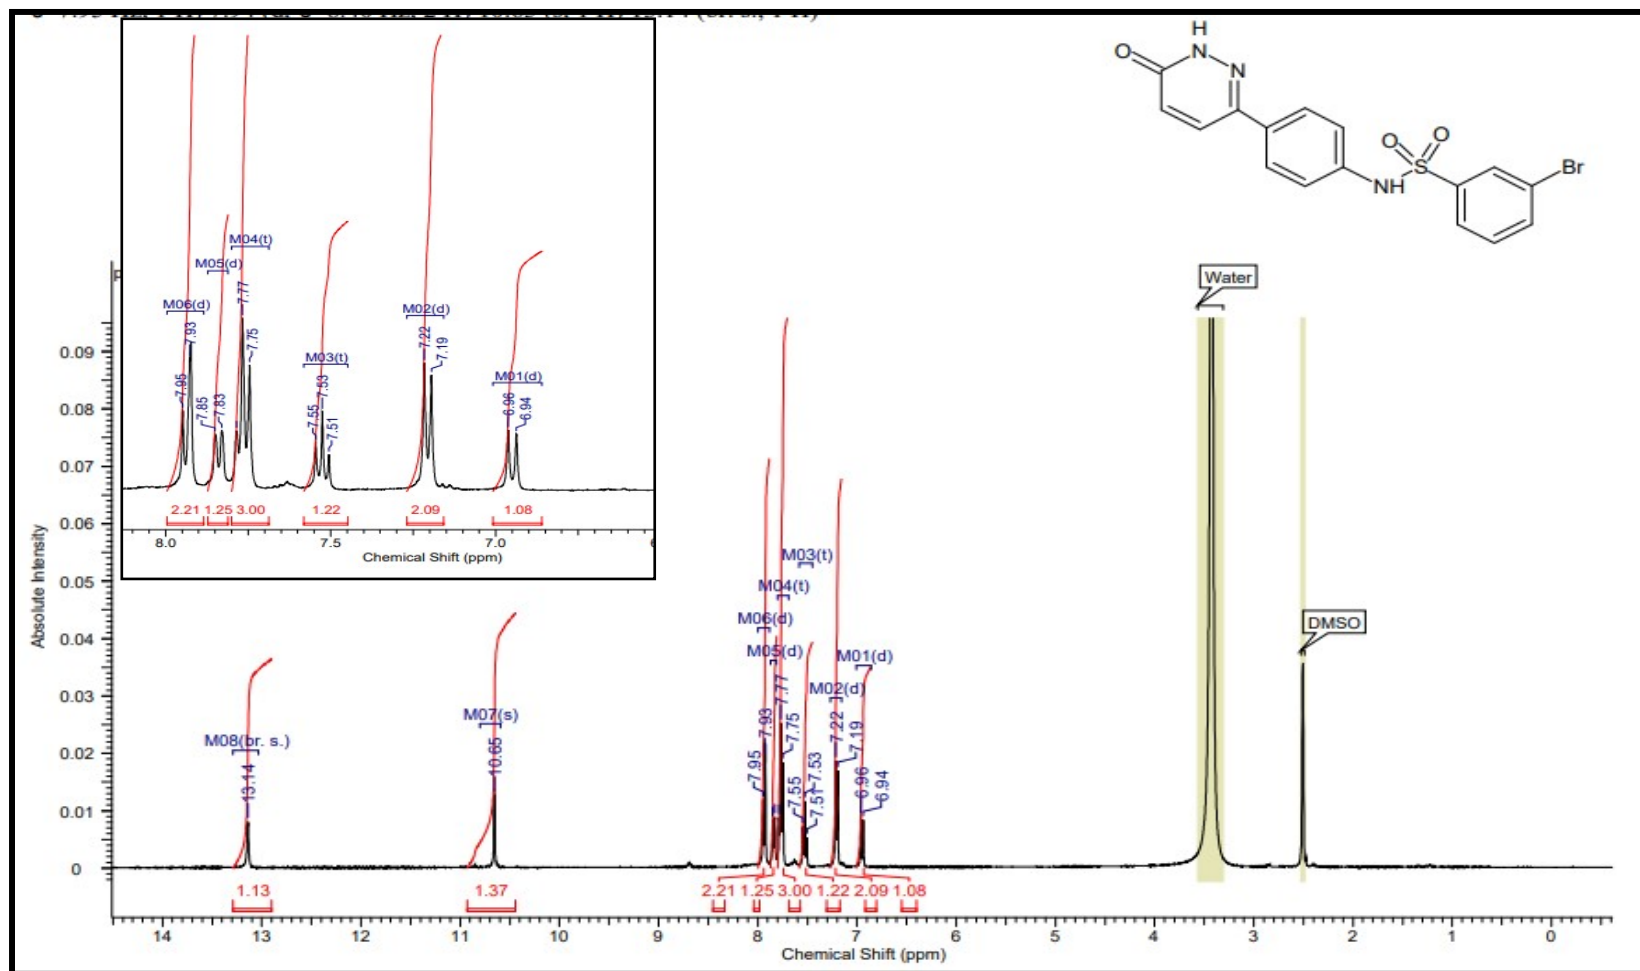

Figure 27a. <sup>1</sup>H NMR spectrum (400 MHz) of compound 11a in DMSO-d<sub>6</sub>.

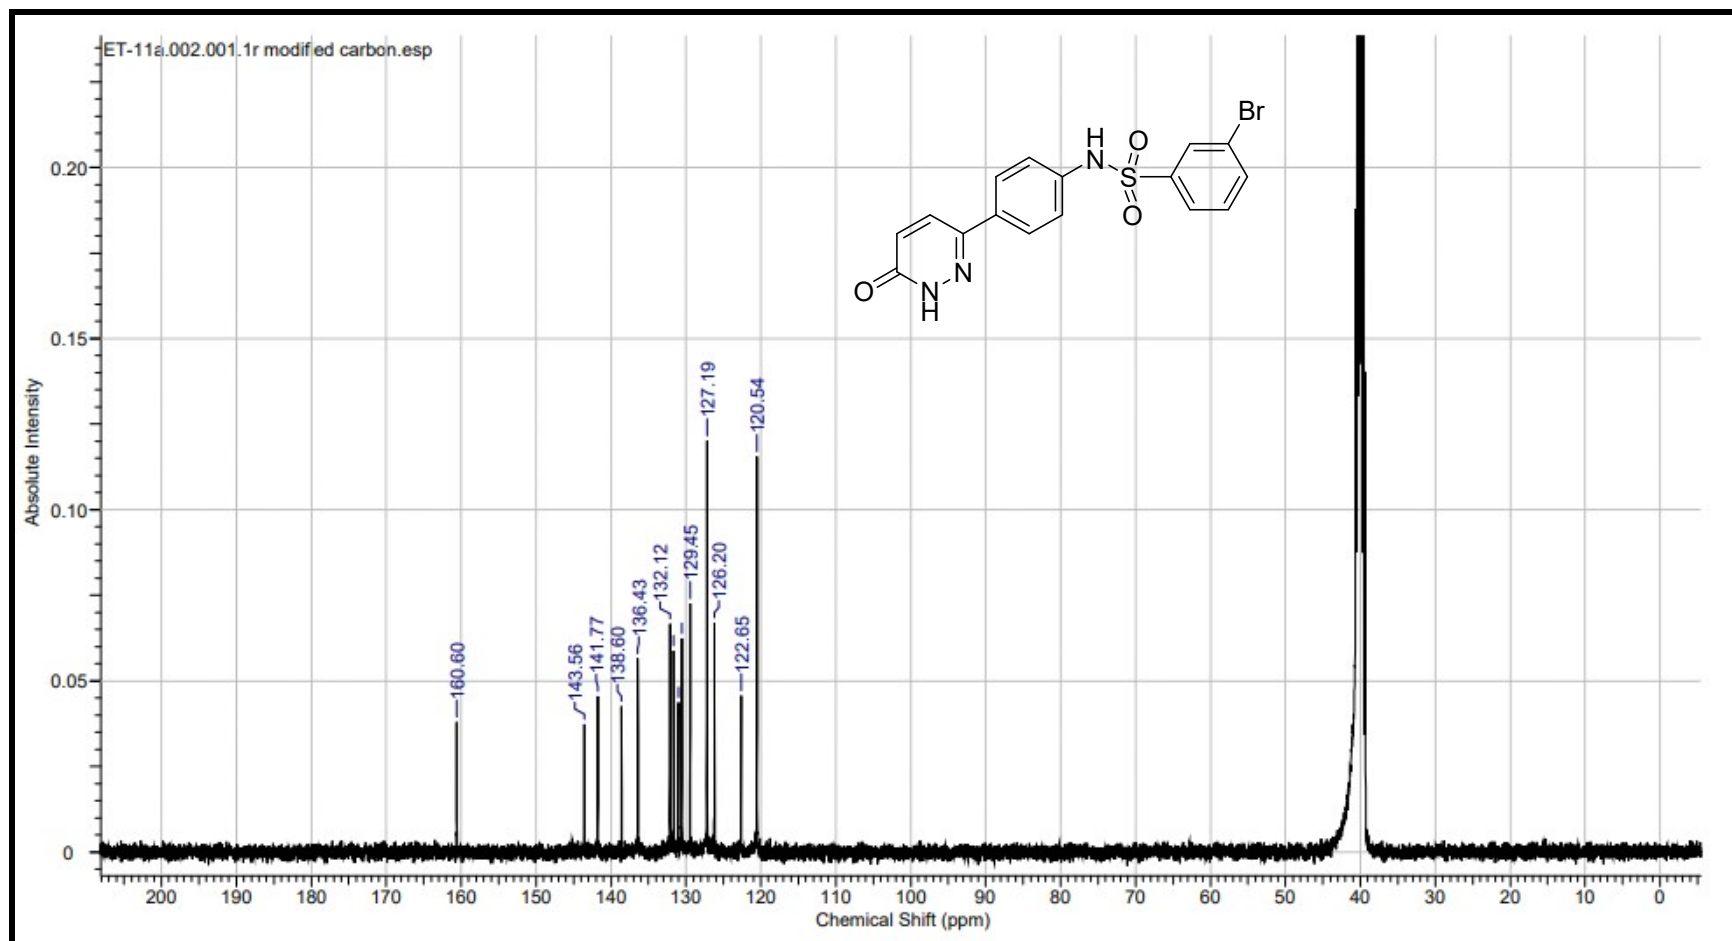

**Figure 27b.  $^{13}\text{C}$  NMR spectrum (100 MHz) of compound 11b in  $\text{DMSO-d}_6$ .**

### Single Mass Analysis

Tolerance = 3.0 PPM / DBE: min = -1.5, max = 12.0

Element prediction: Off

Number of isotope peaks used for i-FIT = 3

Monoisotopic Mass, Even Electron Ions

519 formula(e) evaluated with 1 results within limits (up to 50 best isotopic matches for each mass)

Elements Used:

C: 0-30 H: 0-20 N: 0-5 O: 0-5 S: 0-1 79Br: 0-1 81Br: 0-1

ET-11b/AJ

SYNAPTG2-Si#NotSet

07-Mar-2023

67583

09:57:51

0655 747 (1.483) Cm (745:760)

1: TOF MS ES+

1.39e+006

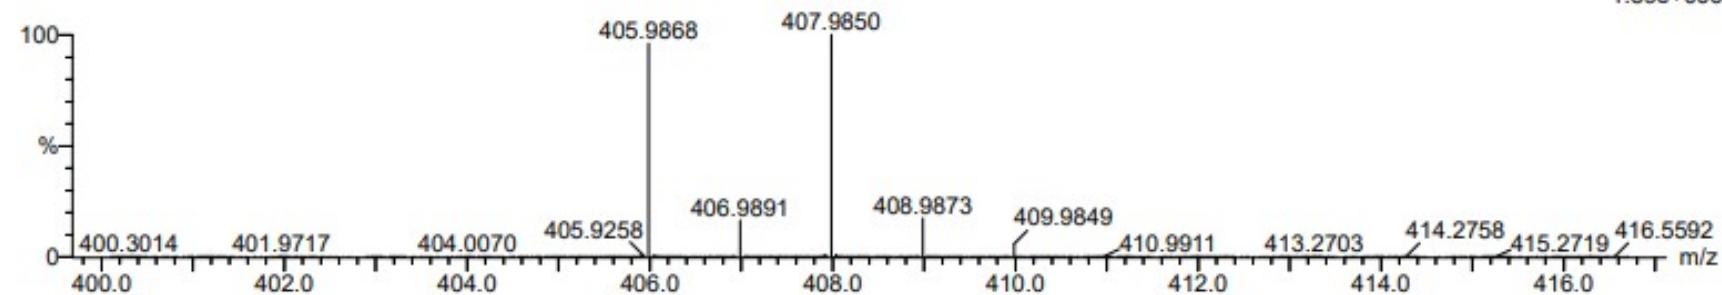

Minimum:

Maximum: 5.0 3.0 -1.5 12.0

| Mass     | Calc. Mass | mDa | PPM | DBE  | i-FIT  | Formula              |
|----------|------------|-----|-----|------|--------|----------------------|
| 405.9868 | 405.9861   | 0.7 | 1.7 | 11.5 | 2189.7 | C16 H13 N3 O3 S 79Br |

Figure 27c. HRMS of compound 11a.

## 4.2. Compound 11b

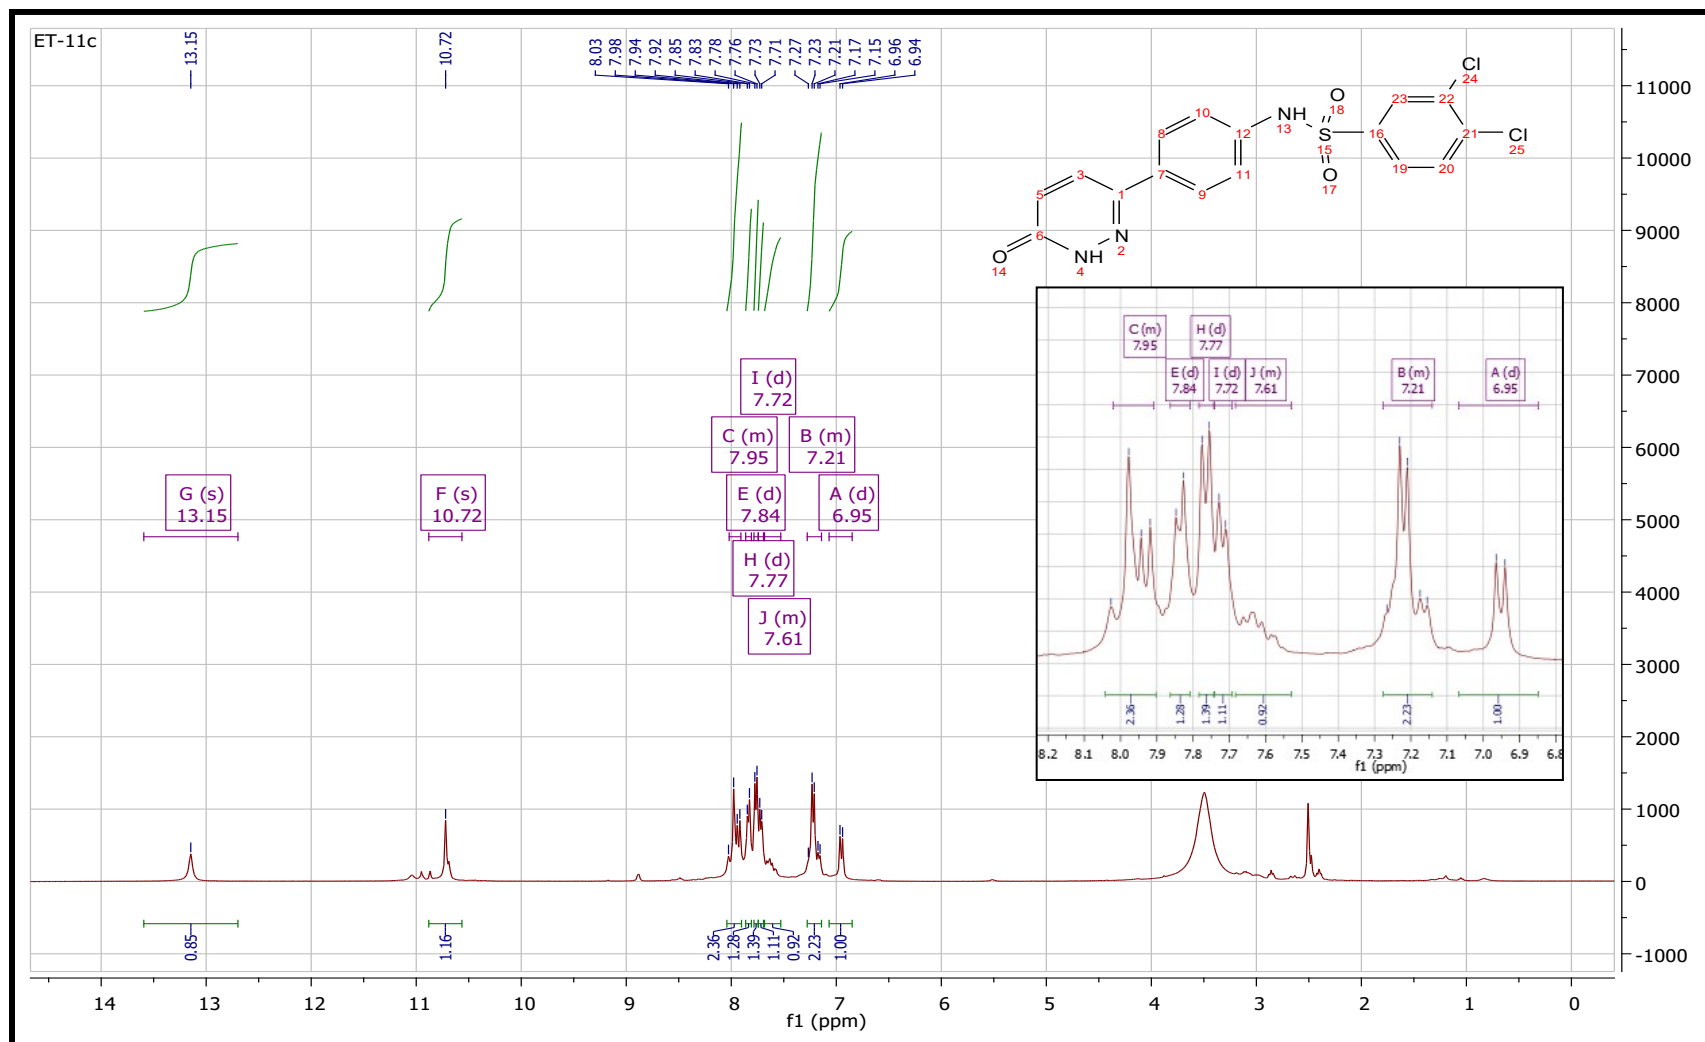

Figure 28a.  $^1\text{H}$  NMR spectrum (400 MHz) of compound 11b in  $\text{DMSO-d}_6$ .

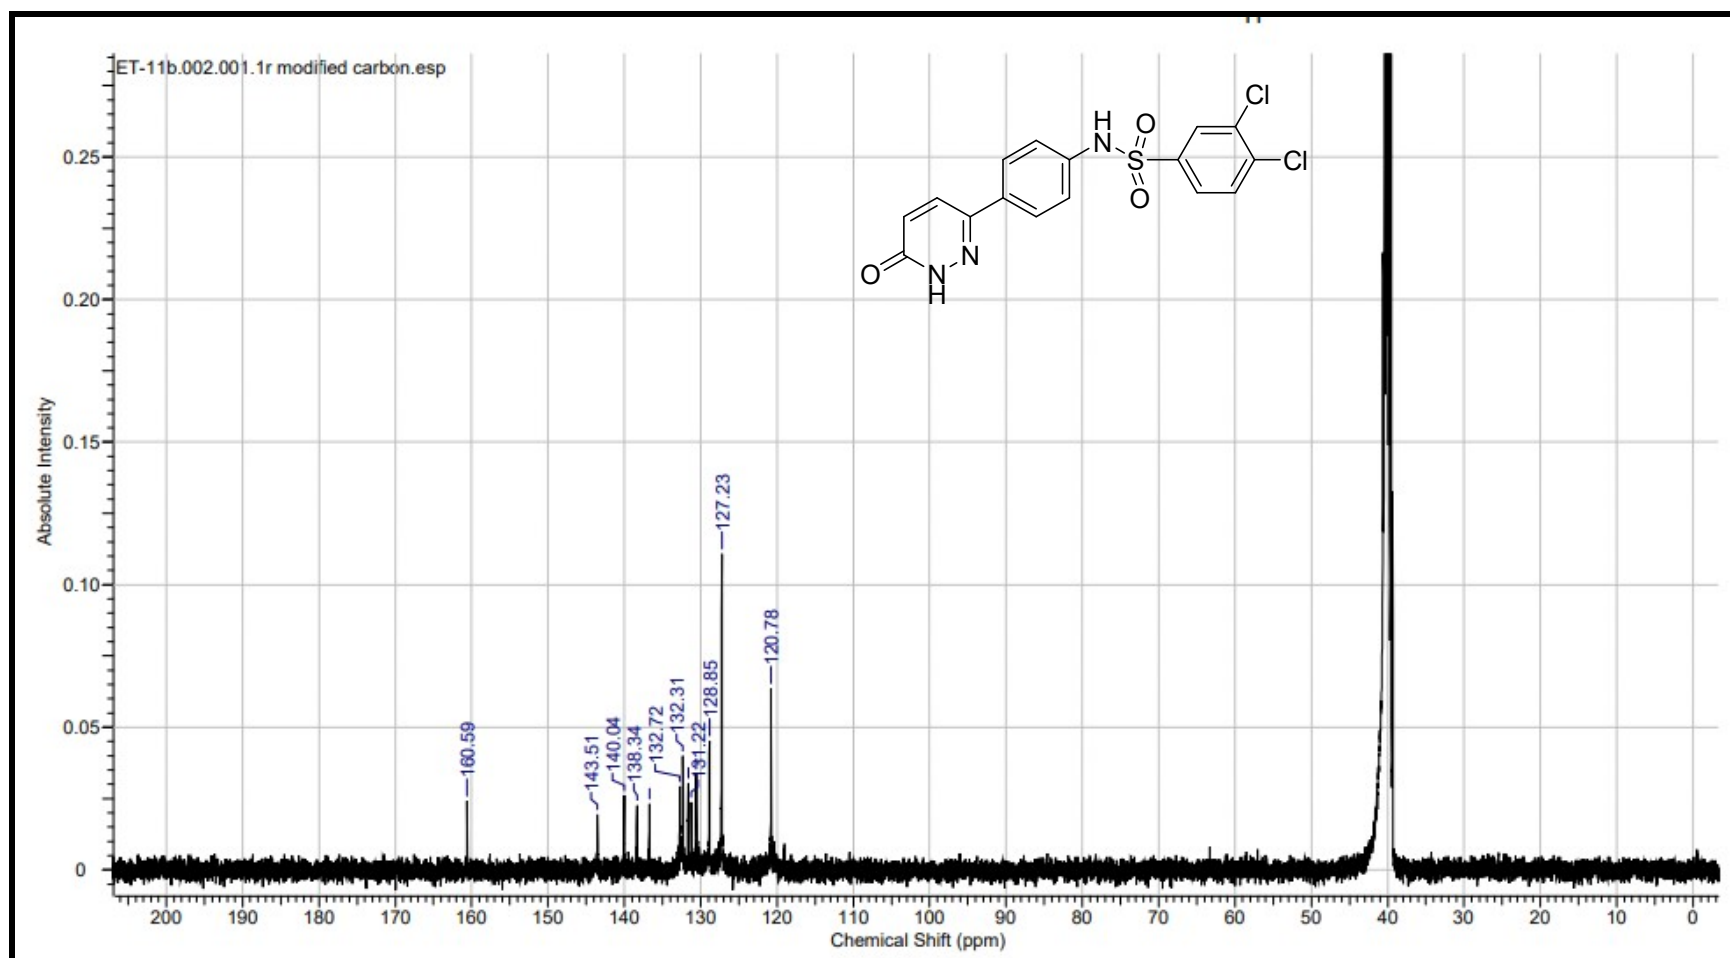

**Figure 28b.**  $^{13}\text{C}$  NMR spectrum (100 MHz) of compound 11b in  $\text{DMSO-d}_6$ .

### Single Mass Analysis

Tolerance = 3.0 PPM / DBE: min = -1.5, max = 20.0

Element prediction: Off

Number of isotope peaks used for i-FIT = 3

Monoisotopic Mass, Odd and Even Electron Ions

839 formula(e) evaluated with 1 results within limits (up to 50 best isotopic matches for each mass)

Elements Used:

C: 0-60 H: 0-60 N: 0-3 O: 0-3 S: 0-1 <sup>35</sup>Cl: 0-2 <sup>37</sup>Cl: 0-1

ET-11c/AJ

SYNAPTG2-Si#NotSet

07-Mar-2023

67588

12:36:52

0666 775 (1.540) Cm (775:804)

1: TOF MS ES+

1.11e+006

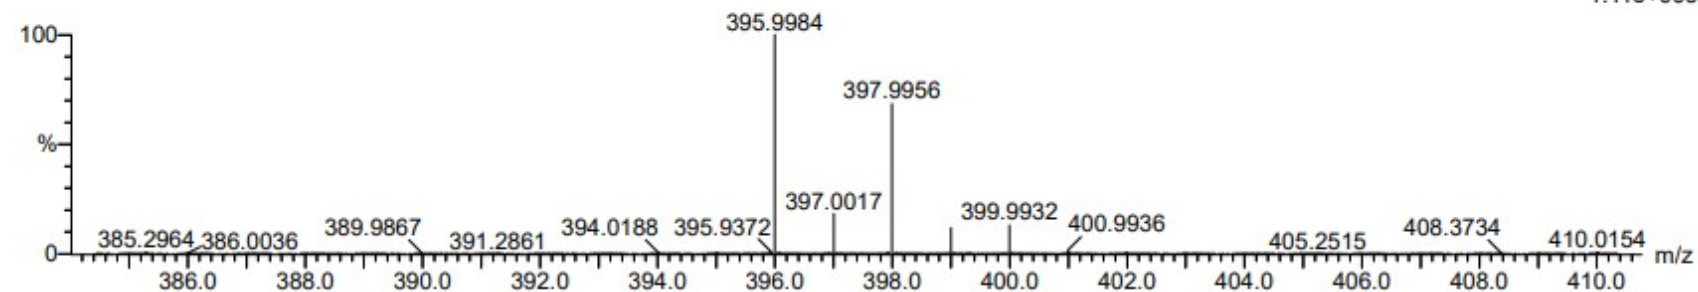

Minimum:

-1.5

Maximum:

5.0

3.0

20.0

| Mass     | Calc. Mass | mDa | PPM | DBE  | i-FIT  | Formula               |
|----------|------------|-----|-----|------|--------|-----------------------|
| 395.9984 | 395.9976   | 0.8 | 2.0 | 11.5 | 2435.2 | C16 H12 N3 O3 S 35Cl2 |

Figure 28c. HRMS of compound 11b.

### 4.3. Compound 11c

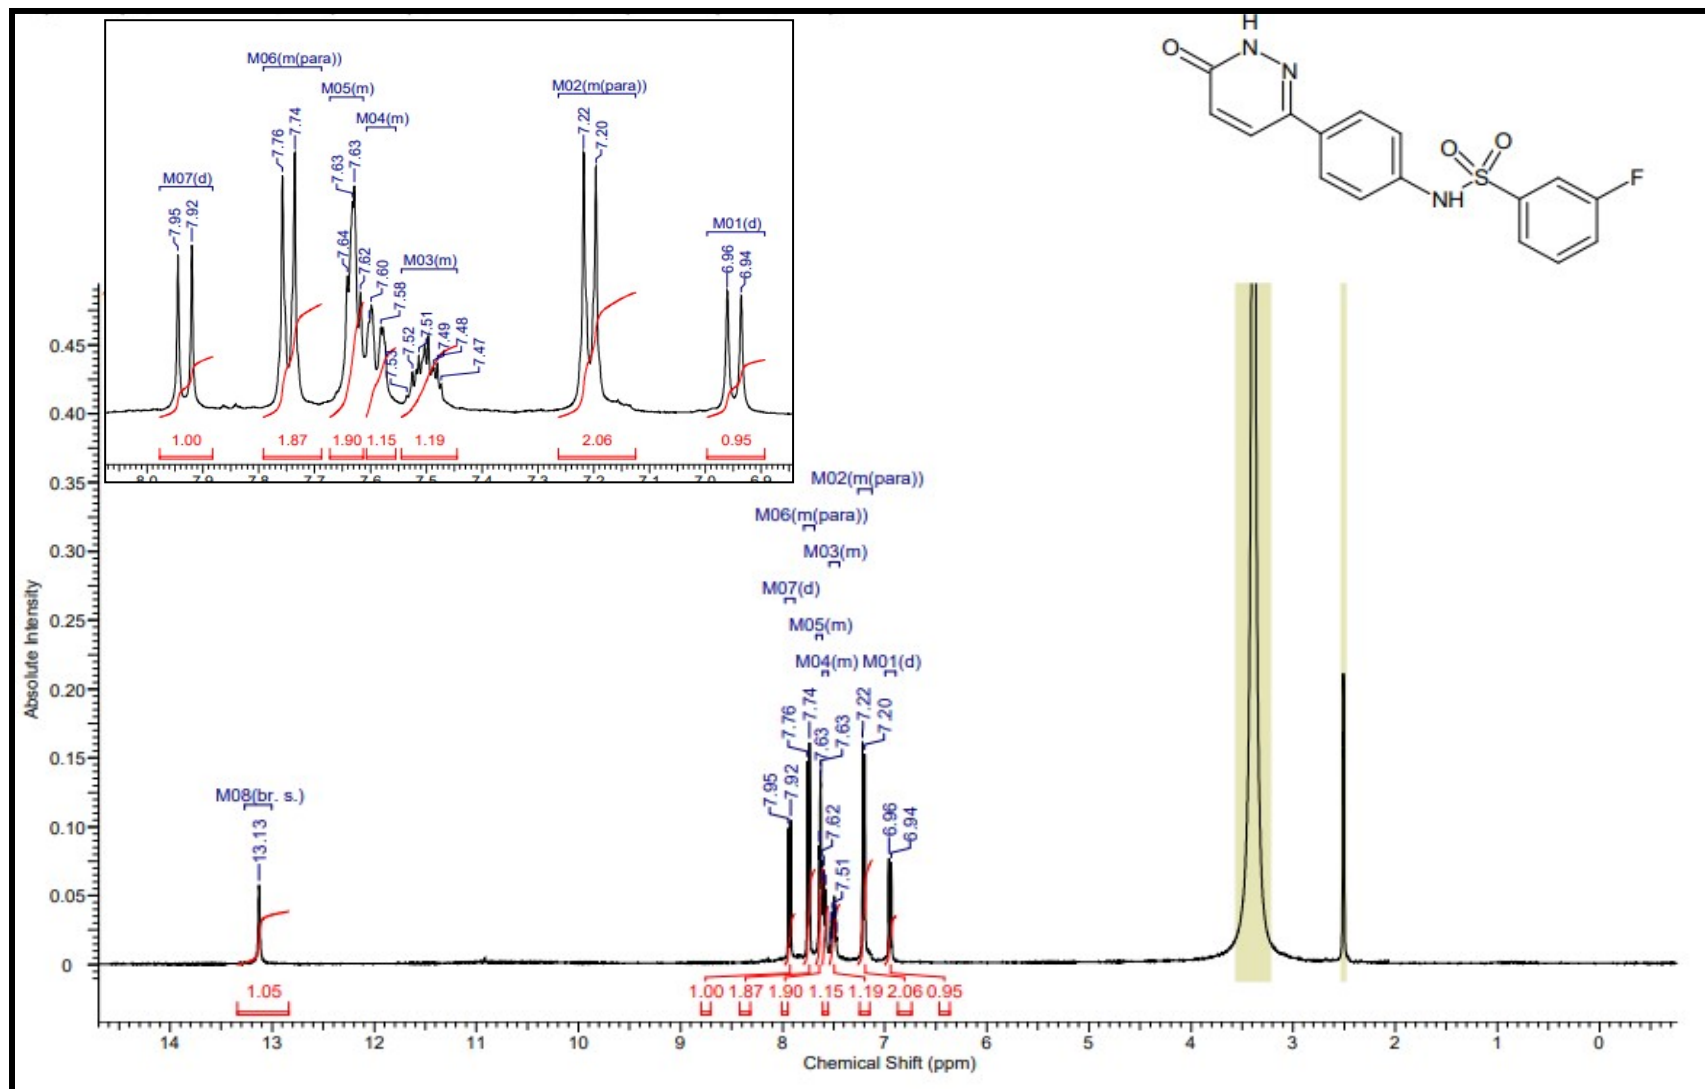

Figure 29a. <sup>1</sup>H NMR spectrum (400 MHz) of compound 11c in DMSO-d<sub>6</sub>.

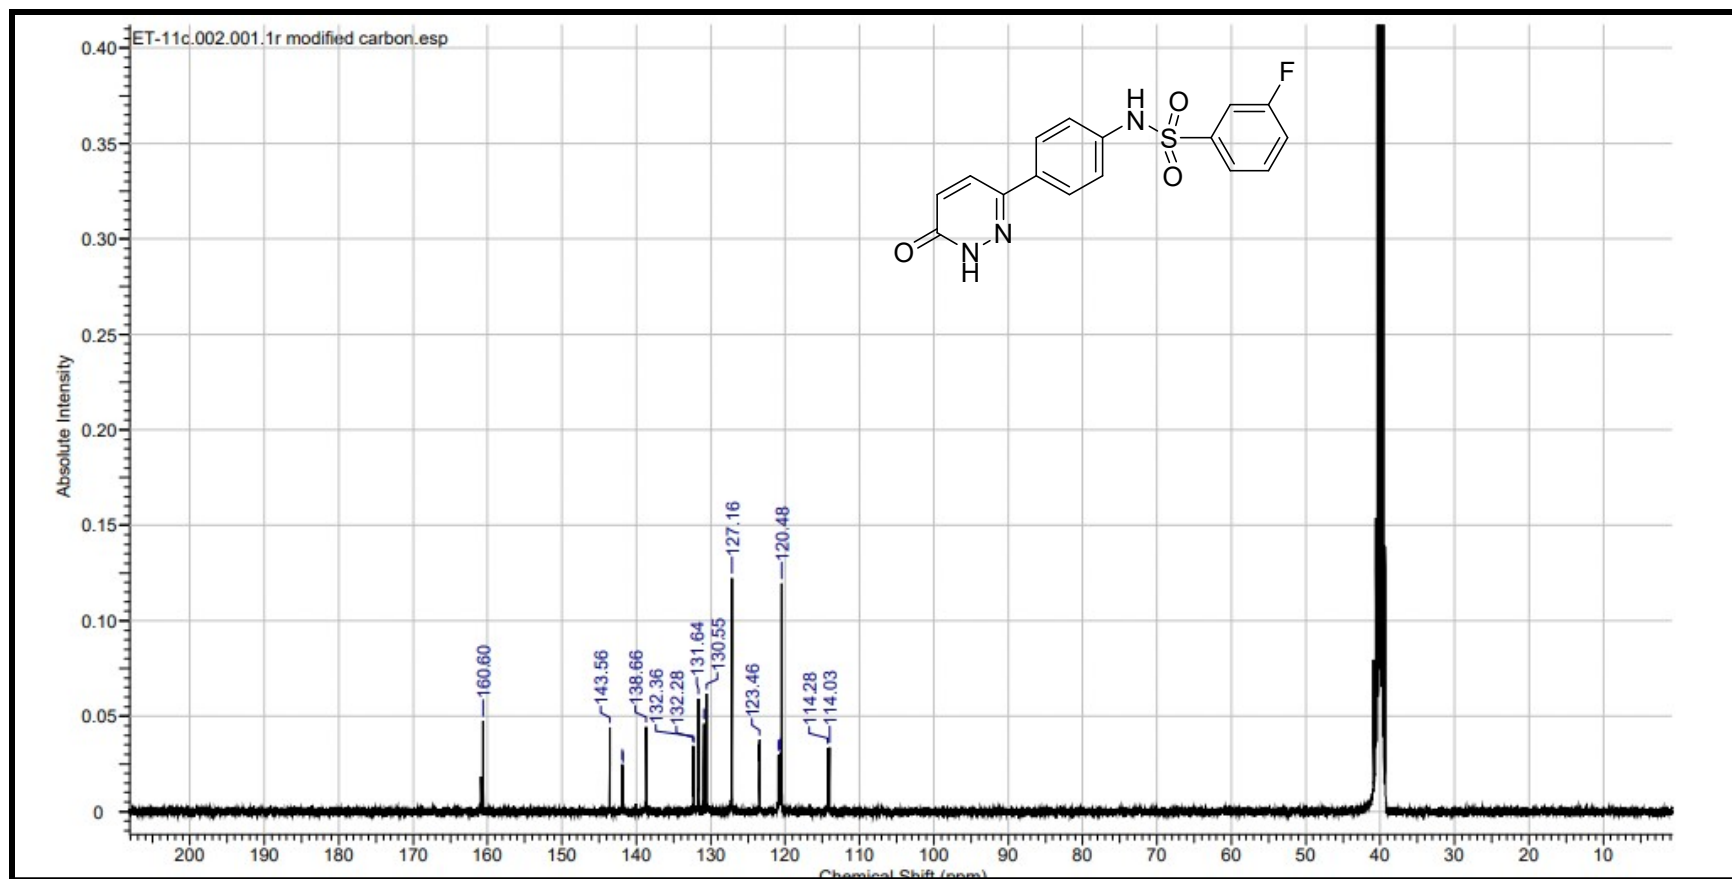

**Figure 29b.  $^{13}\text{C}$  NMR spectrum (100 MHz) of compound 11c in  $\text{DMSO-d}_6$ .**



### Single Mass Analysis

Tolerance = 3.0 PPM / DBE: min = -1.5, max = 15.0

Element prediction: Off

Number of isotope peaks used for i-FIT = 3

Monoisotopic Mass, Even Electron Ions

581 formula(e) evaluated with 1 results within limits (up to 50 best isotopic matches for each mass)

Elements Used:

C: 0-60 H: 0-50 N: 0-5 O: 0-5 F: 0-1 S: 0-1

ET-11d/AJ

SYNAPTQ2-Si#NotSet

07-Mar-2023

67596

13:45:59

0674 886 (1.757) Cm (868:889)

1: TOF MS ES+

4.92e+005

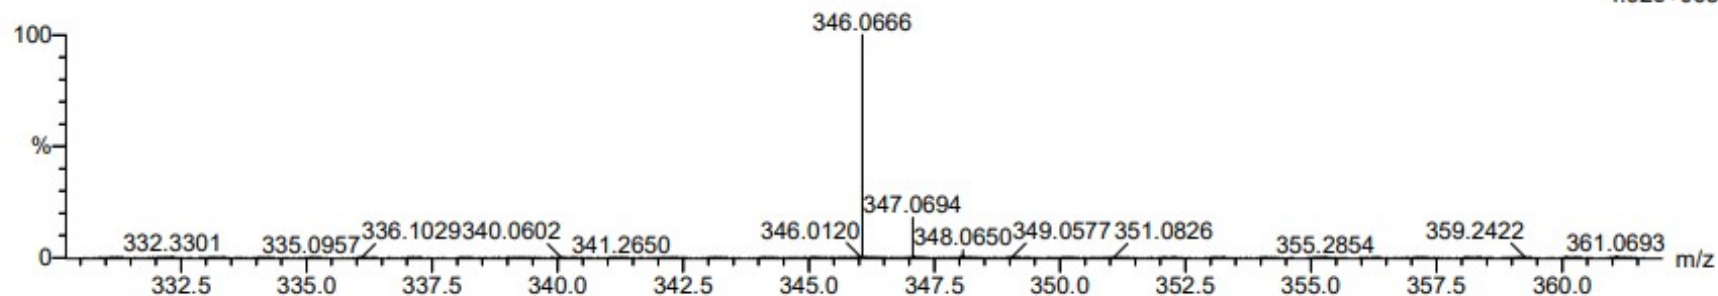

Minimum: -1.5  
Maximum: 5.0 3.0 15.0

| Mass     | Calc. Mass | mDa | PPM | DBE  | i-FIT  | Formula           |
|----------|------------|-----|-----|------|--------|-------------------|
| 346.0666 | 346.0662   | 0.4 | 1.2 | 11.5 | 1450.3 | C16 H13 N3 O3 F S |

Figure 29c. HRMS of compound 11c.

## 4.4. Compound 11d

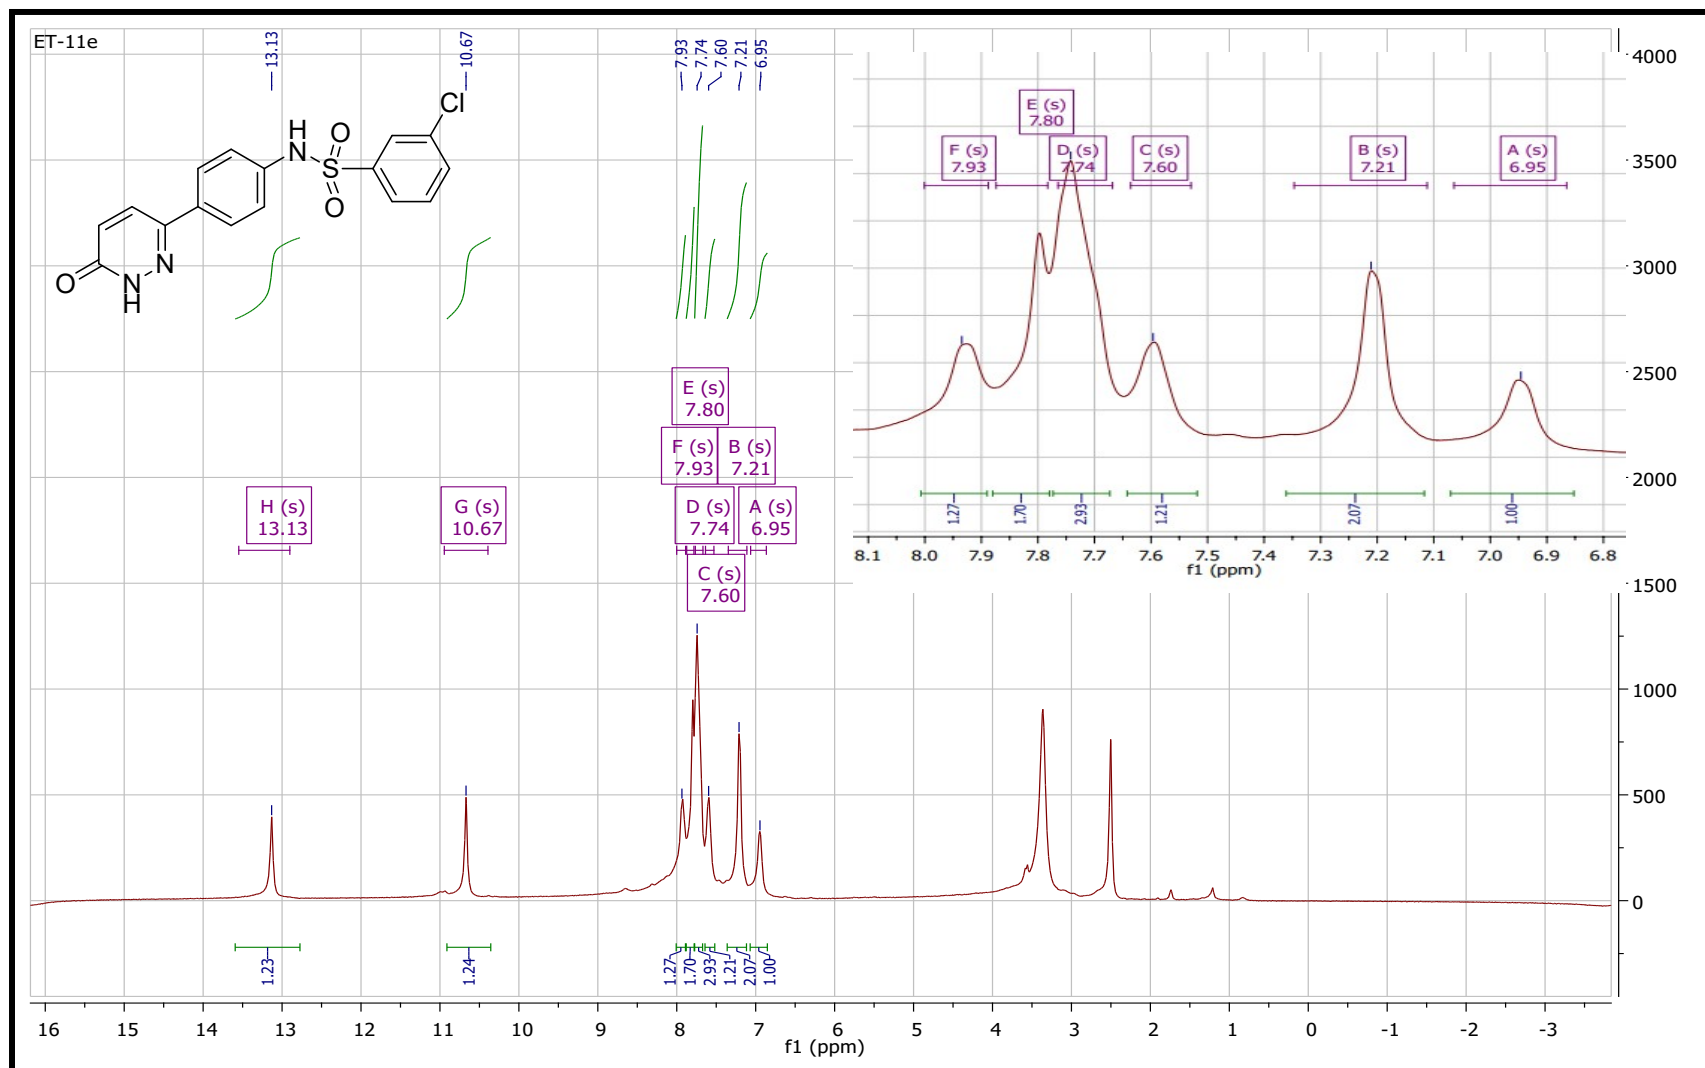

Figure 30a.  $^1\text{H}$  NMR spectrum (400 MHz) of compound 11d in  $\text{DMSO-d}_6$ .

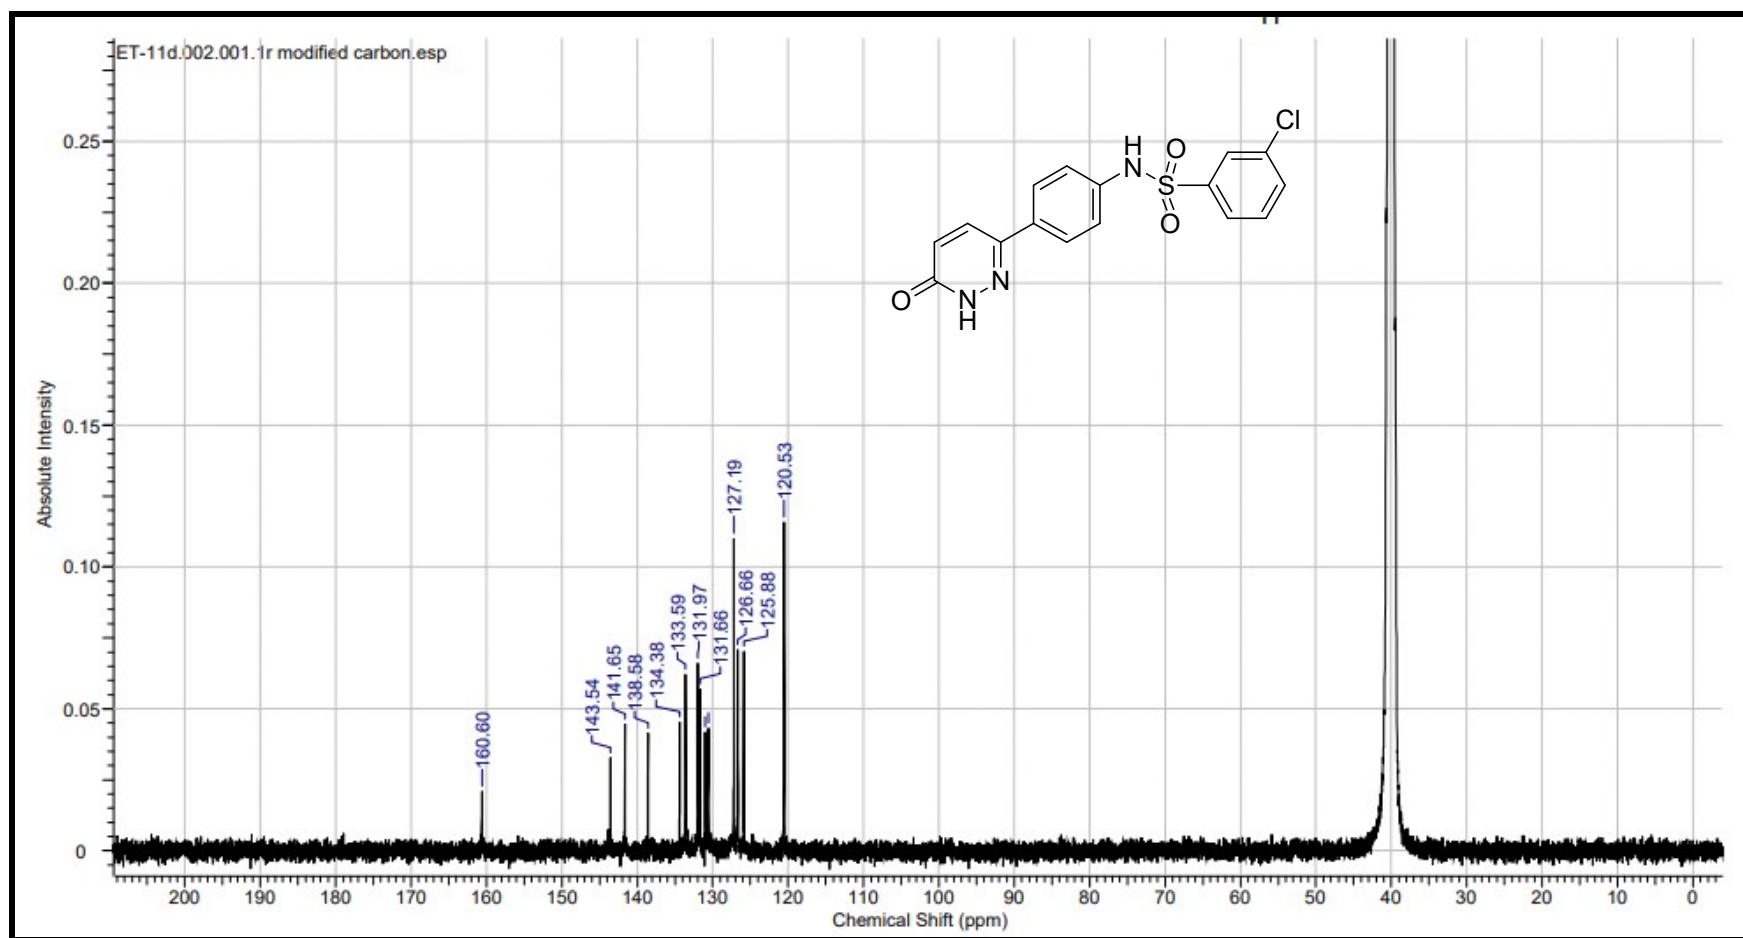

**Figure 30b.  $^{13}\text{C}$  NMR spectrum (100 MHz) of compound 11d in  $\text{DMSO-d}_6$ .**

### Single Mass Analysis

Tolerance = 3.0 PPM / DBE: min = -1.5, max = 20.0

Element prediction: Off

Number of isotope peaks used for i-FIT = 3

Monoisotopic Mass, Even Electron Ions

789 formula(e) evaluated with 1 results within limits (up to 50 best isotopic matches for each mass)

Elements Used:

C: 0-60 H: 0-60 N: 0-5 O: 0-3 S: 0-1 35Cl: 0-1 37Cl: 0-1

ET-11e/AJ

SYNAPT G2-Si#NotSet

07-Mar-2023

67586

12:29:34

0664 1033 (2.046) Cm (1026:1038)

1: TOF MS ES+

2.76e+005

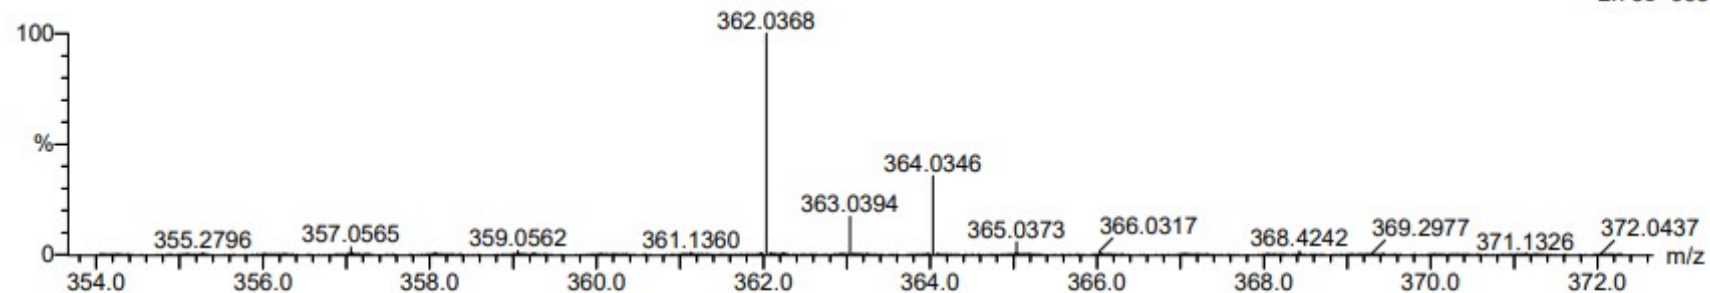

Minimum:

-1.5

Maximum:

5.0

3.0

20.0

Mass

Calc. Mass

mDa

PPM

DBE

i-FIT

Formula

362.0368

362.0366

0.2

0.6

11.5

1459.2

C16 H13 N3 O3 S 35Cl

**Figure 30c. HRMS of compound 11d.**

## 4.5. Compound 11e

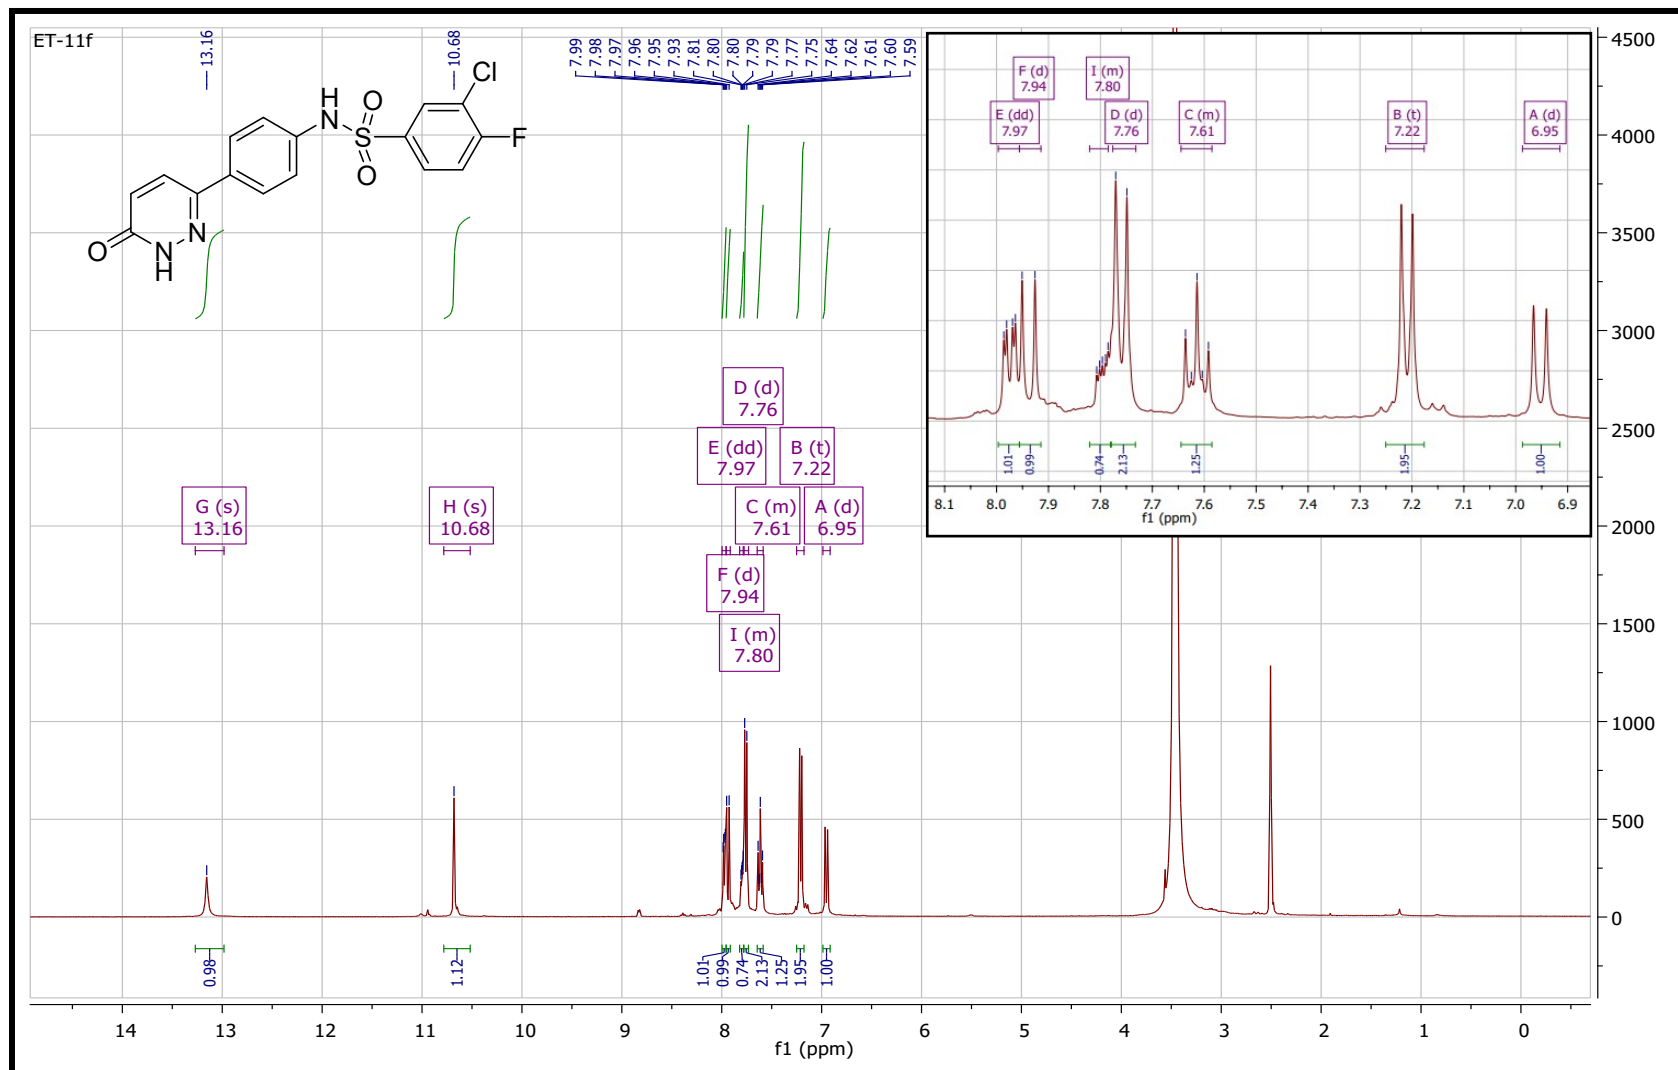

Figure 31a.  $^1\text{H}$  NMR spectrum (400 MHz) of compound 11e in  $\text{DMSO-d}_6$ .

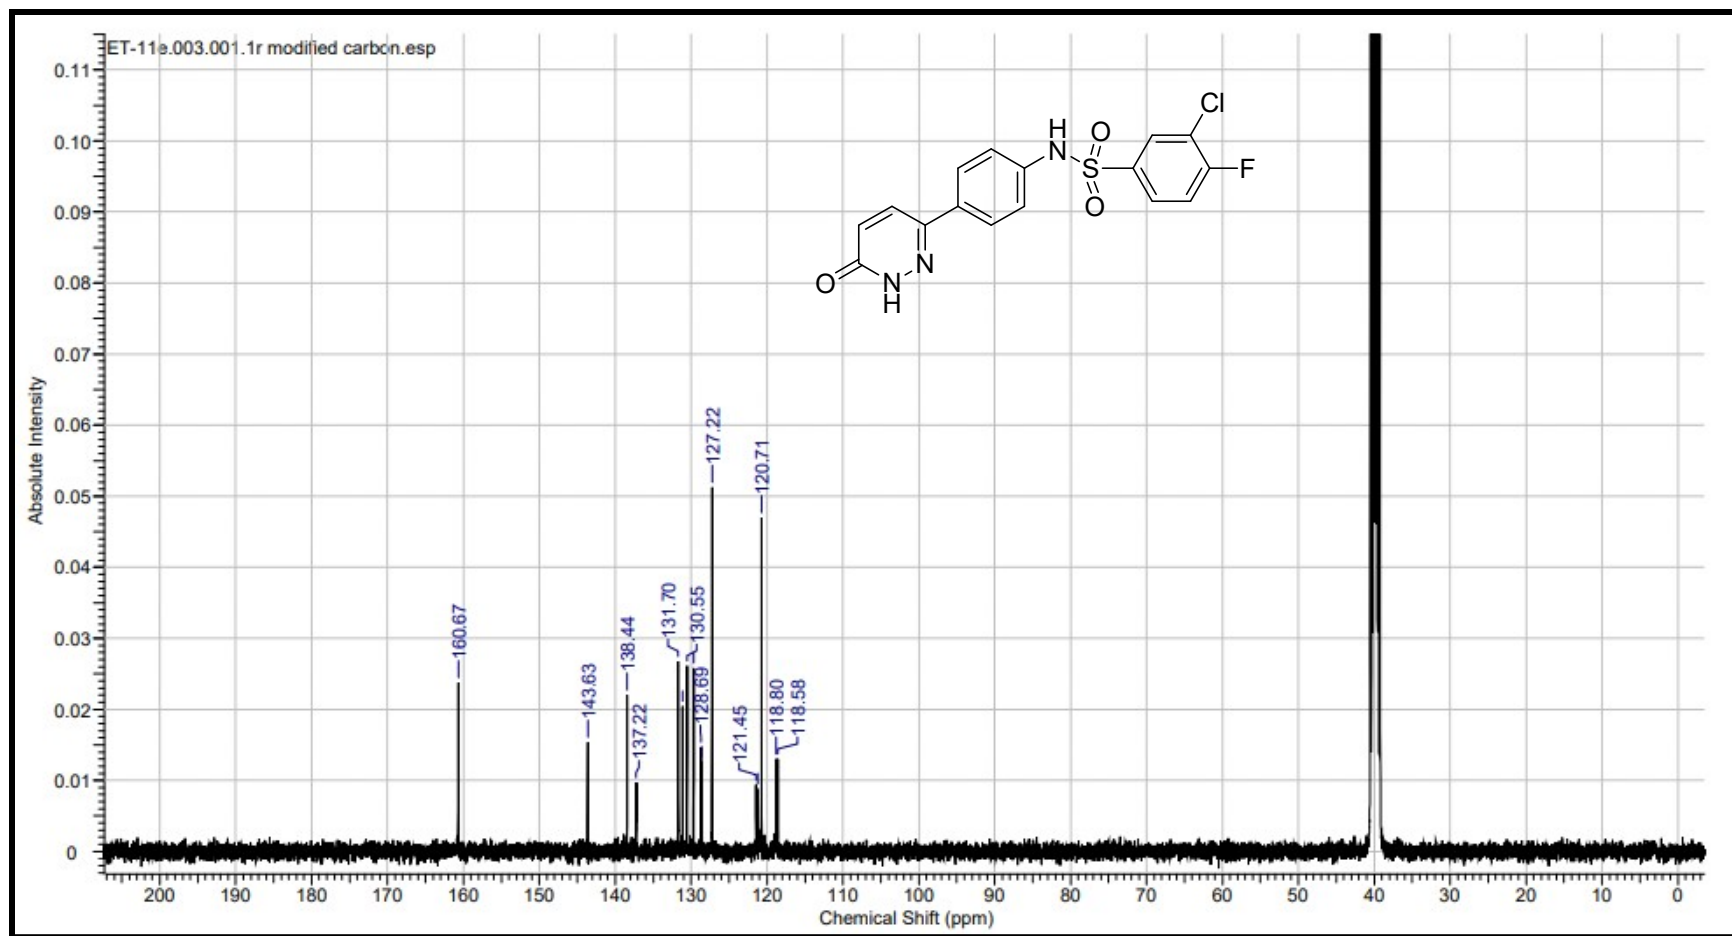

**Figure 31b.  $^{13}\text{C}$  NMR spectrum (100 MHz) of compound 11e in  $\text{DMSO-d}_6$ .**

### Single Mass Analysis

Tolerance = 3.0 PPM / DBE: min = -1.5, max = 14.0

Element prediction: Off

Number of isotope peaks used for i-FIT = 3

Monoisotopic Mass, Even Electron Ions

469 formula(e) evaluated with 1 results within limits (up to 50 closest results for each mass)

Elements Used:

C: 0-30 H: 0-20 N: 0-3 O: 0-3 S: 0-1 35Cl: 0-1 37Cl: 0-1 F: 0-1

ET-11F/AJ

SYNAPTG2-Si#NotSet

27-Feb-2023

67559

11:56:00

0565 1360 (2.683) Cm (1353:1375)

1: TOF MS ES+

1.20e+005

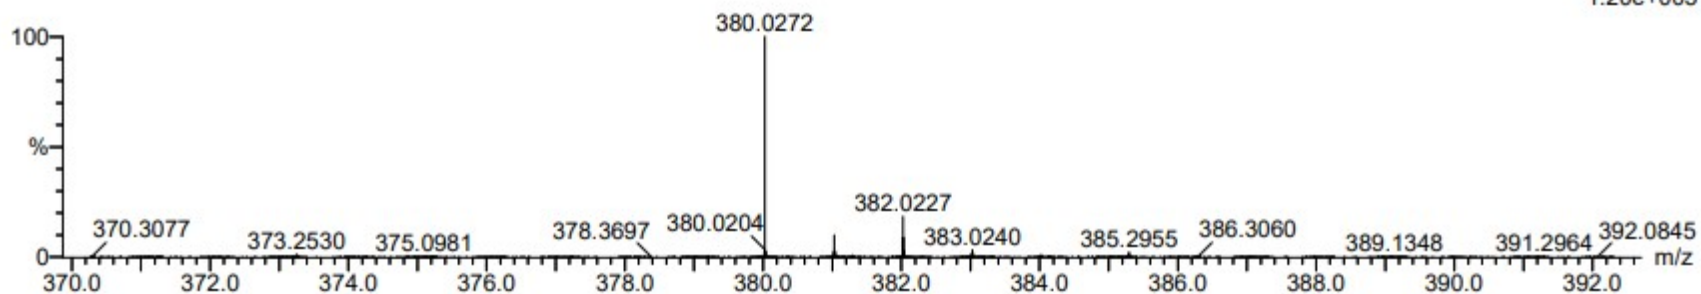

Minimum: -1.5  
Maximum: 5.0 3.0 14.0

| Mass     | Calc. Mass | mDa | PPM | DBE  | i-FIT  | Formula                |
|----------|------------|-----|-----|------|--------|------------------------|
| 380.0272 | 380.0272   | 0.0 | 0.0 | 11.5 | 1352.3 | C16 H12 N3 O3 S 35Cl F |

Figure 31c. HRMS of compound 11e.

## 4.6. Compound 11f

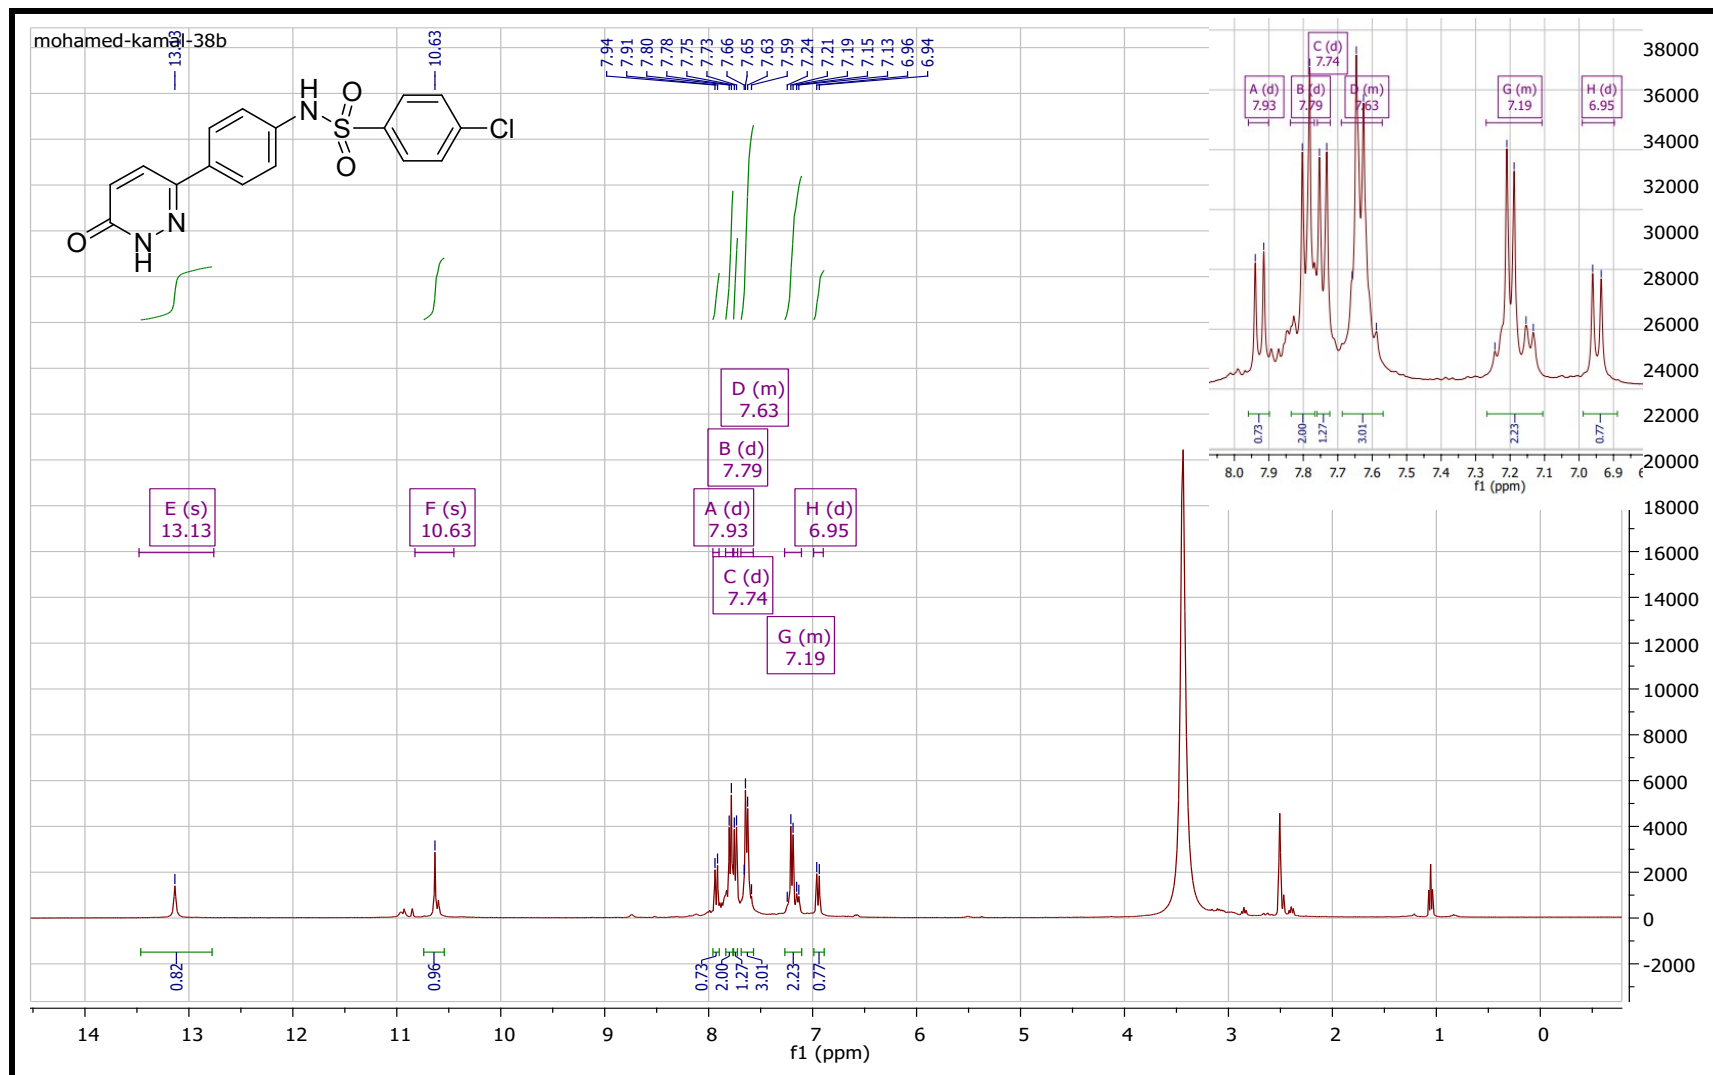

Figure 32a.  $^1\text{H}$  NMR spectrum (400 MHz) of compound 11f in  $\text{DMSO-d}_6$ .



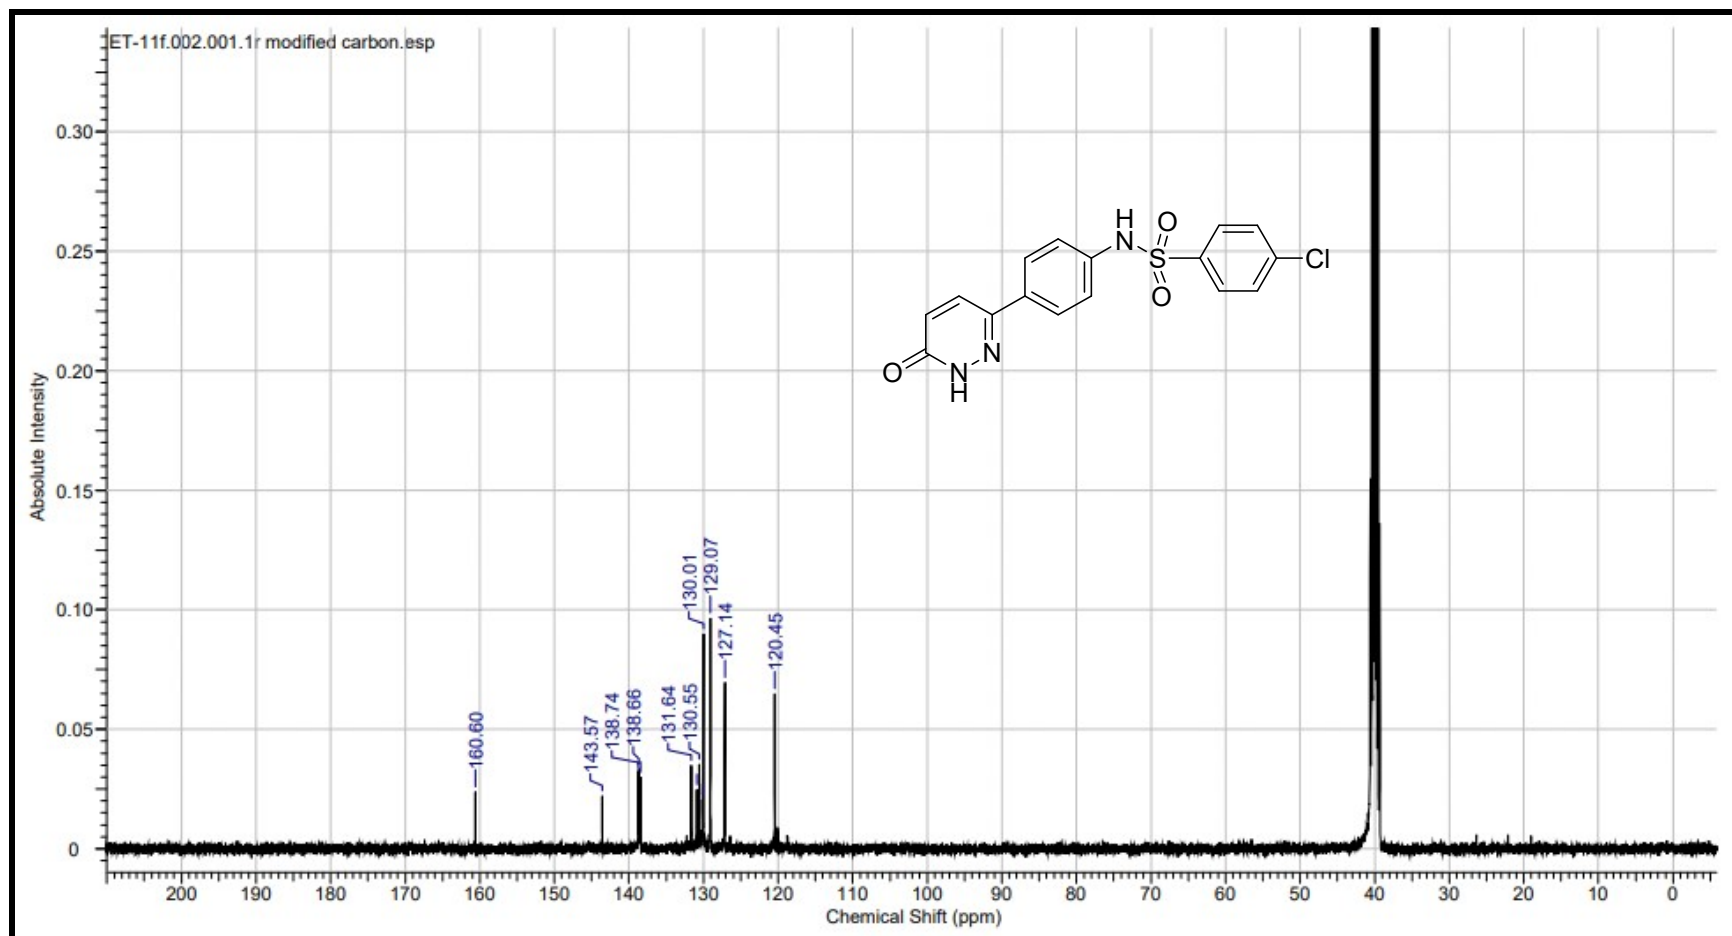

**Figure 32b.  $^{13}\text{C}$  NMR spectrum (100 MHz) of compound 11f in  $\text{DMSO-d}_6$ .**

### Single Mass Analysis

Tolerance = 3.0 PPM / DBE: min = -1.5, max = 25.0

Element prediction: Off

Number of isotope peaks used for i-FIT = 3

Monoisotopic Mass, Even Electron Ions

231 formula(e) evaluated with 1 results within limits (up to 50 best isotopic matches for each mass)

Elements Used:

C: 0-20 H: 0-20 N: 0-4 O: 0-4 S: 0-1 35Cl: 0-1 37Cl: 0-1

ET-11G/AJ

SYNAPTG2-Si#NotSet

07-Mar-2023

67593

13:35:05

0671 861 (1.709) Cm (470:986)

1: TOF MS ES+

1.57e+007

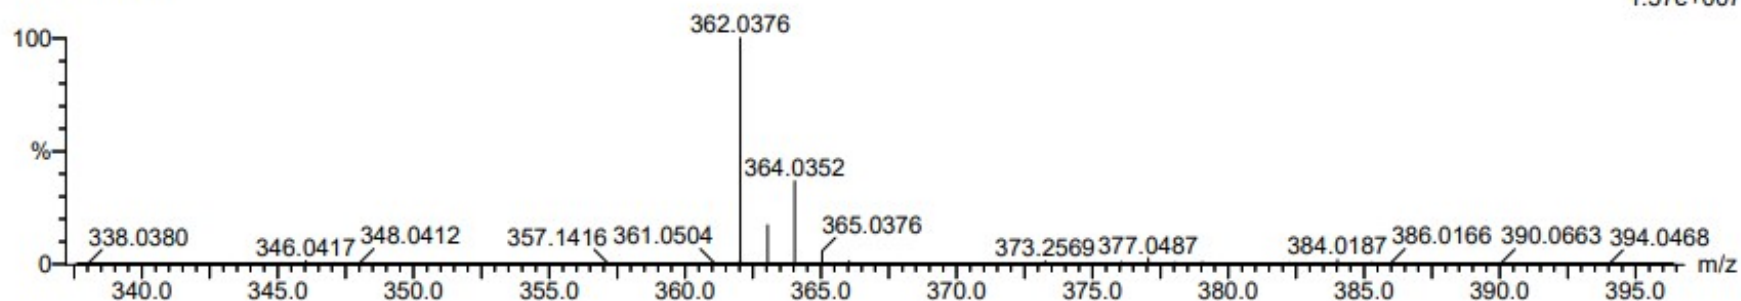

Minimum: -1.5  
Maximum: 5.0 3.0 25.0

| Mass     | Calc. Mass | mDa | PPM | DBE  | i-FIT  | Formula              |
|----------|------------|-----|-----|------|--------|----------------------|
| 362.0376 | 362.0366   | 1.0 | 2.8 | 11.5 | 4263.9 | C16 H13 N3 O3 S 35Cl |

Figure 32c. HRMS of compound 11f.

## 5. Spectral data of series V - VII

### 5.1. Compound 17a

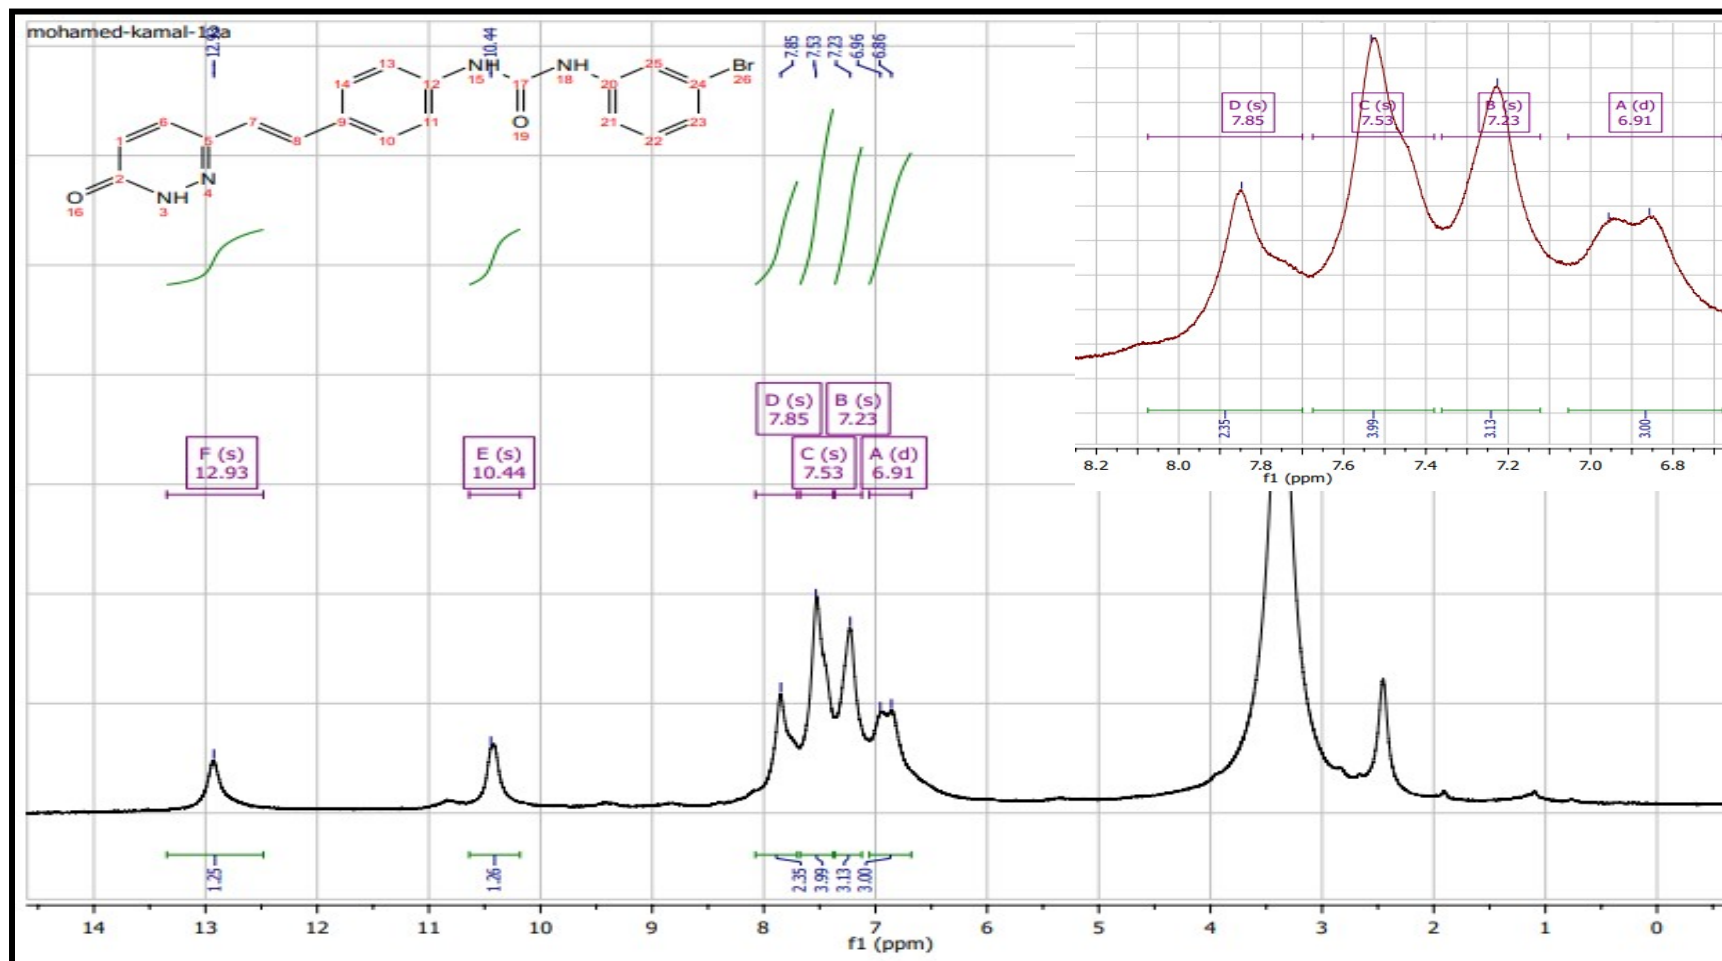

Figure 33. <sup>1</sup>H NMR spectrum (400 MHz) of compound 17a in DMSO-d<sub>6</sub>.

## 5.2. Compound 17b

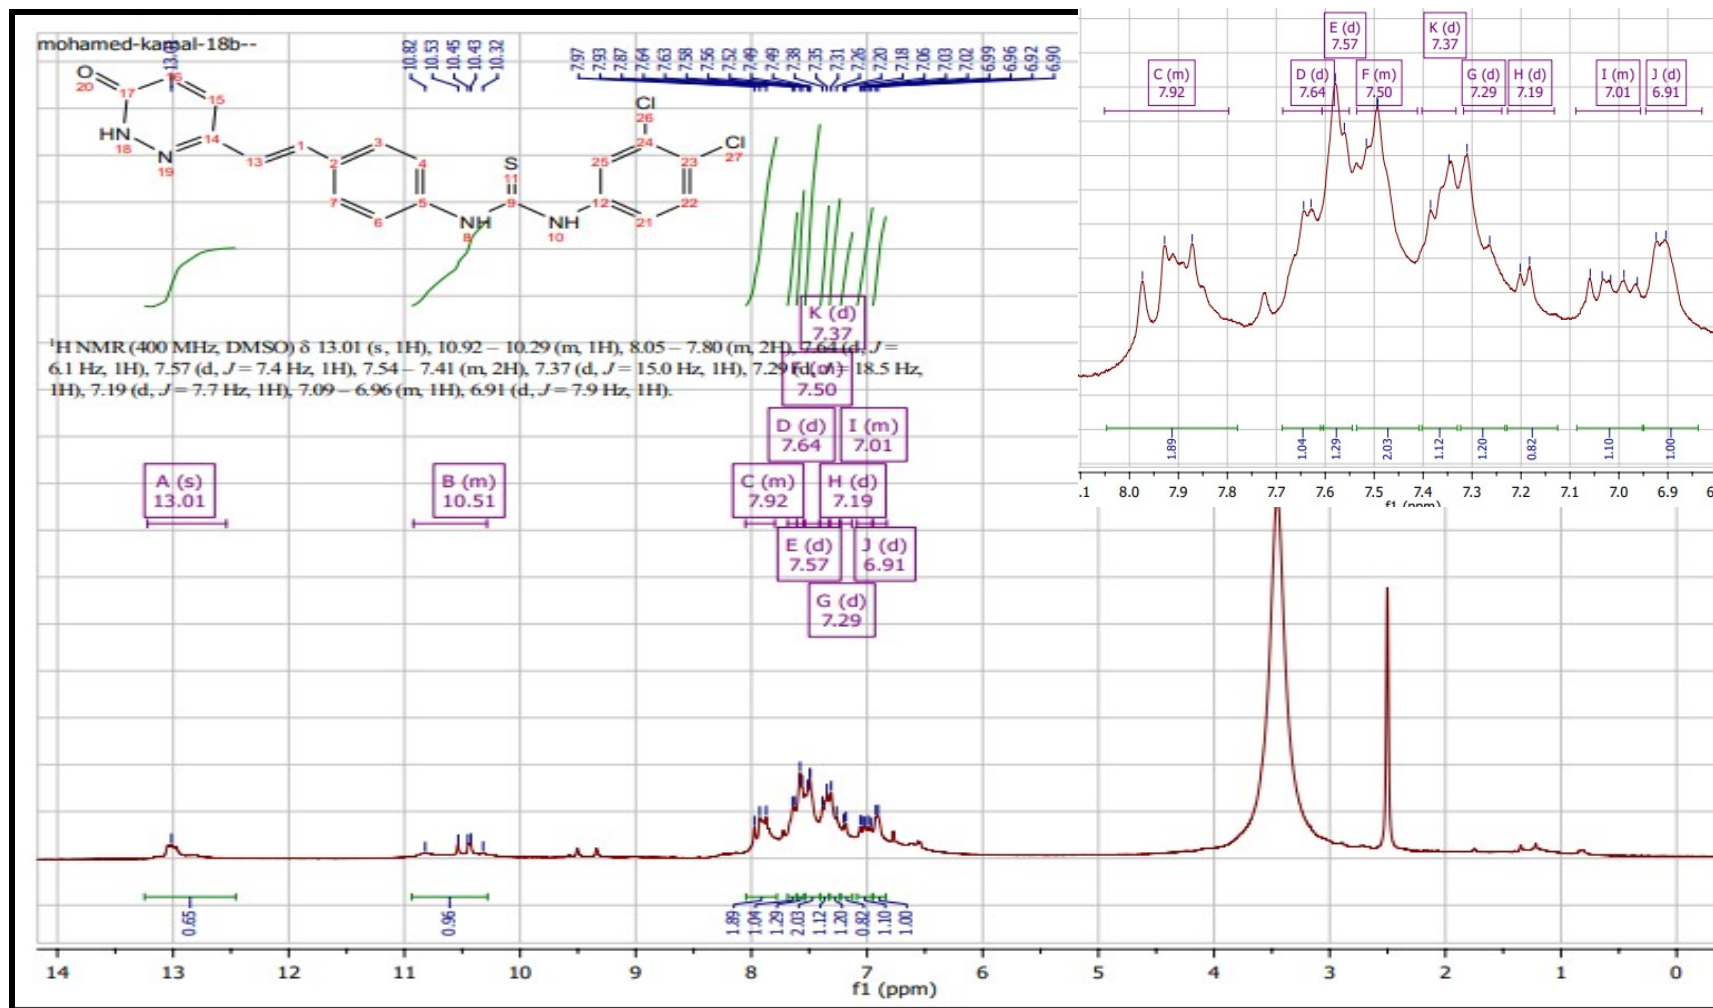

Figure 34. <sup>1</sup>H NMR spectrum (400 MHz) of compound 17b in DMSO-d<sub>6</sub>.

### 5.3. Compound 18a

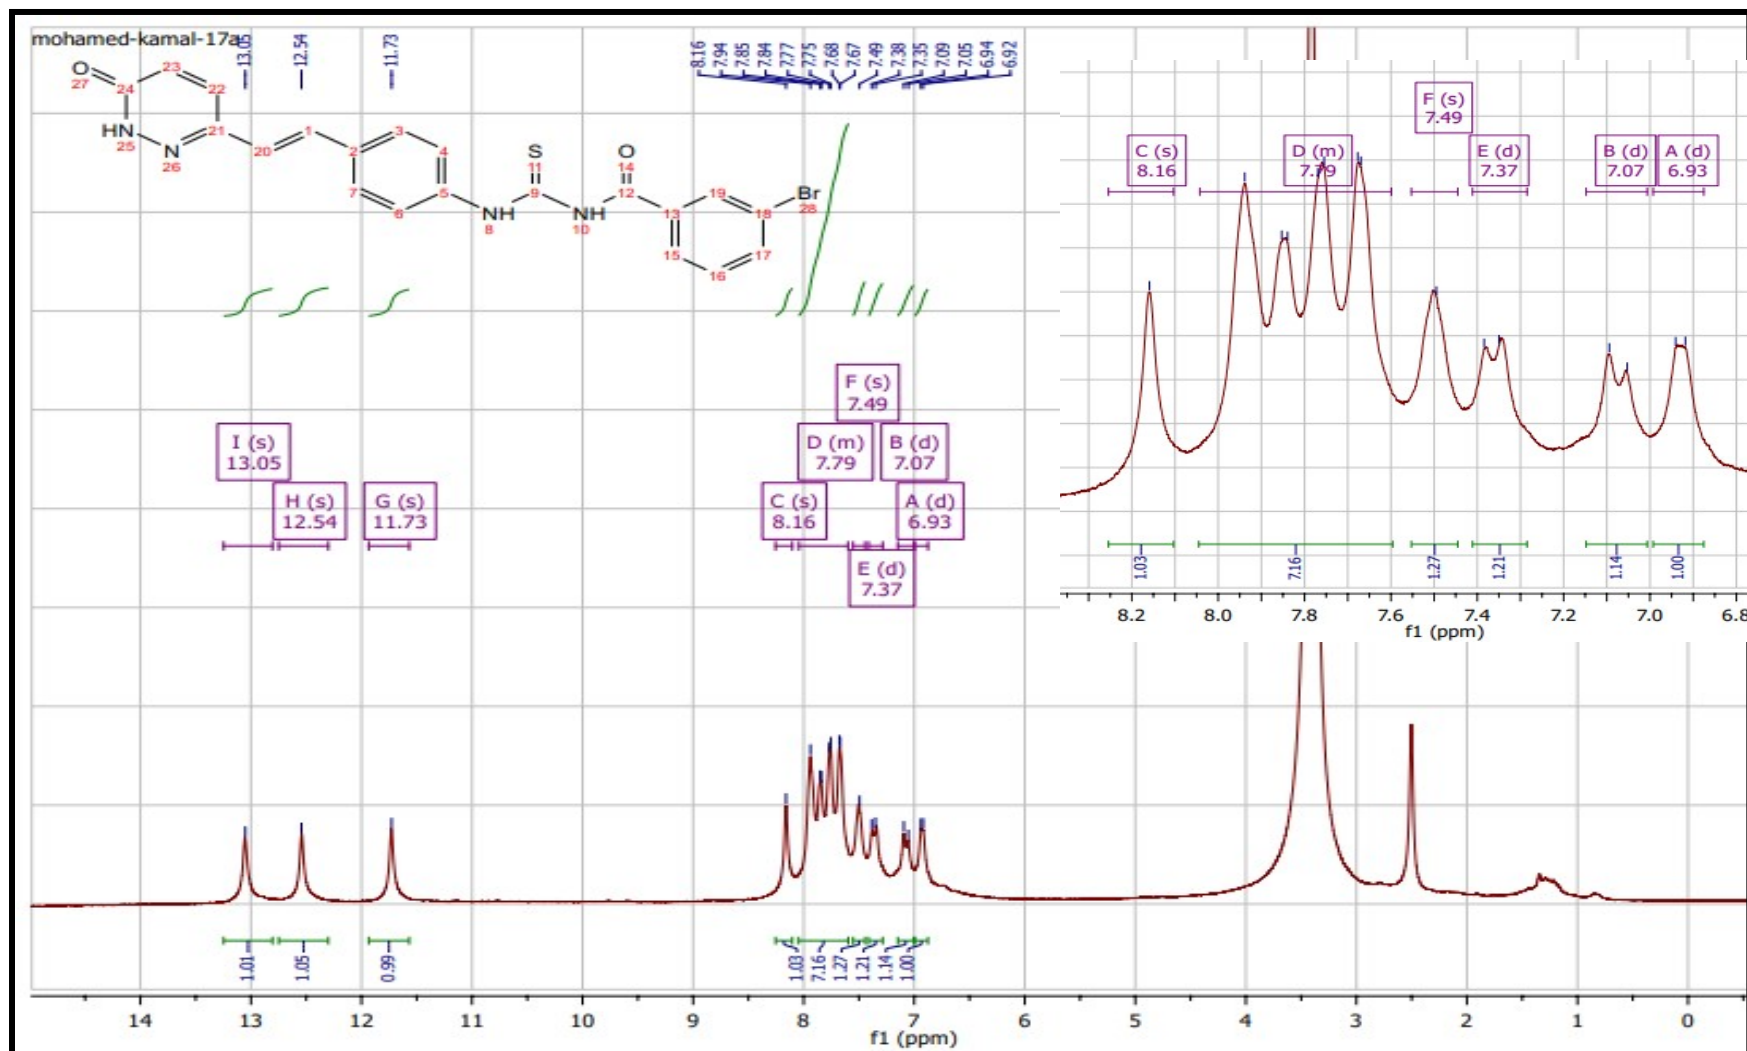

Figure 35. <sup>1</sup>H NMR spectrum (400 MHz) of compound 18a in DMSO-d<sub>6</sub>.

## 5.4. Compound 18b

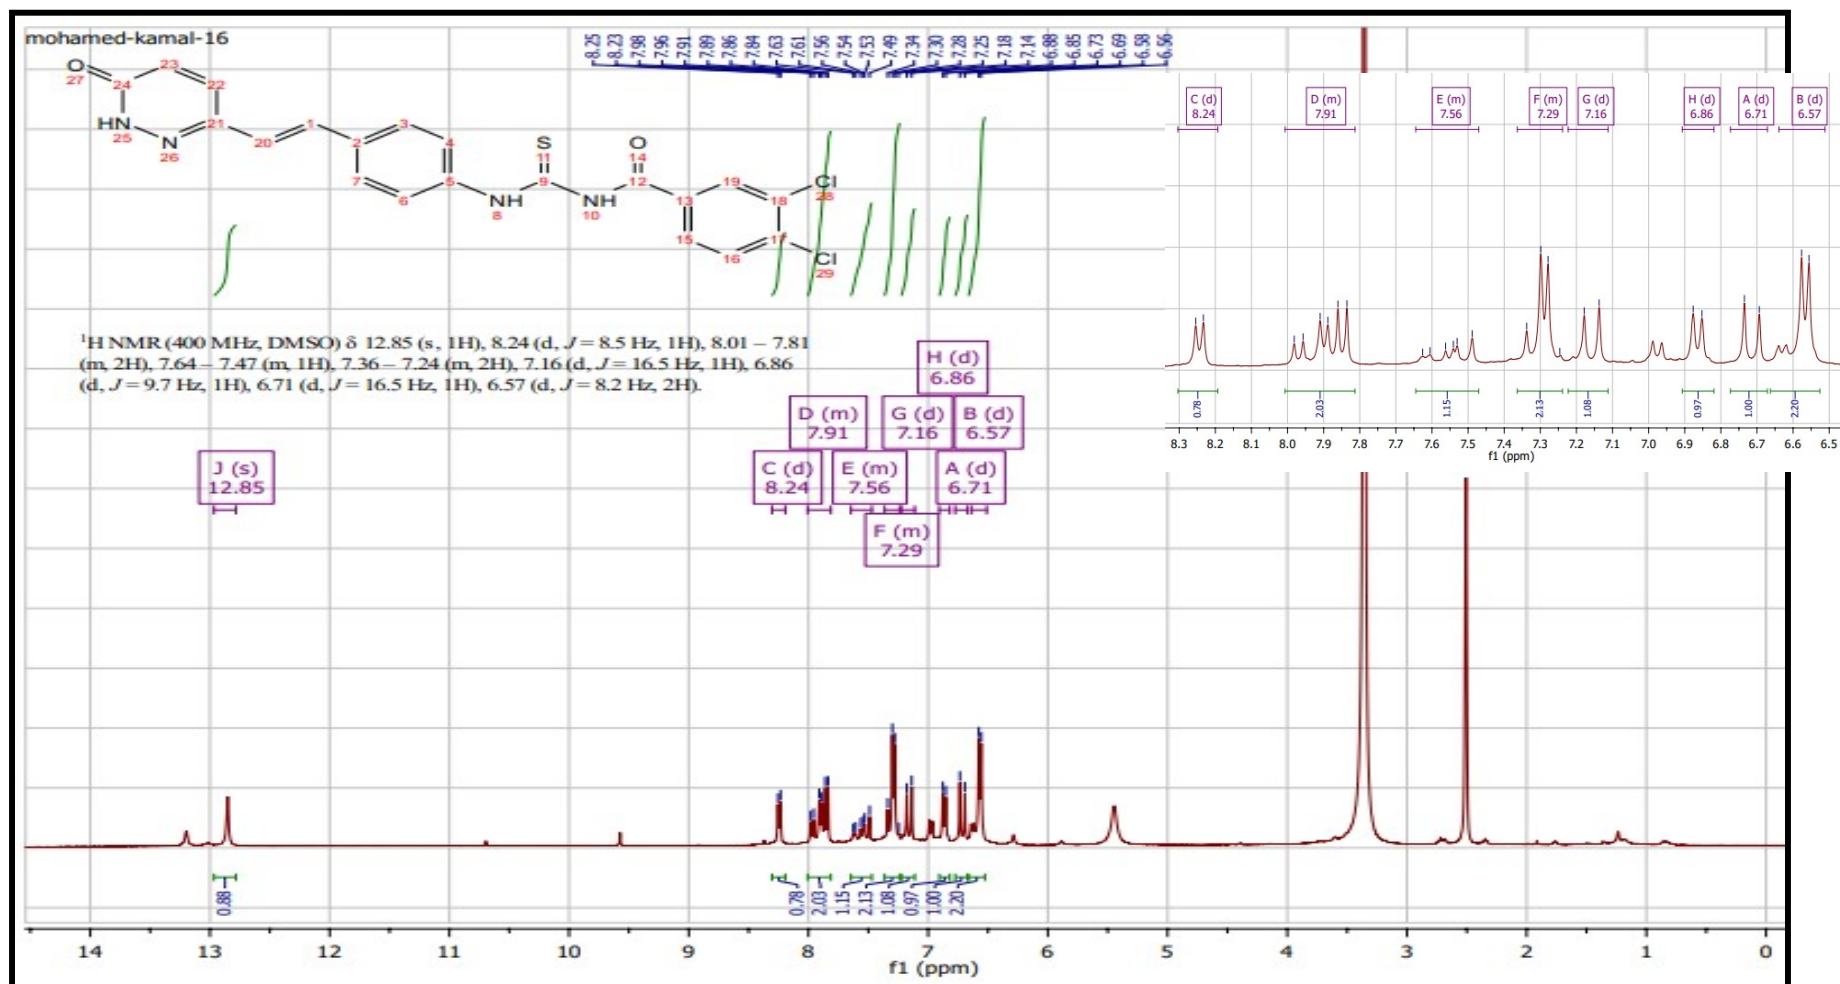

Figure 36.  $^1\text{H NMR}$  spectrum (400 MHz) of compound 18b in DMSO- $\text{d}_6$ .

## 5.5. Compound 19a

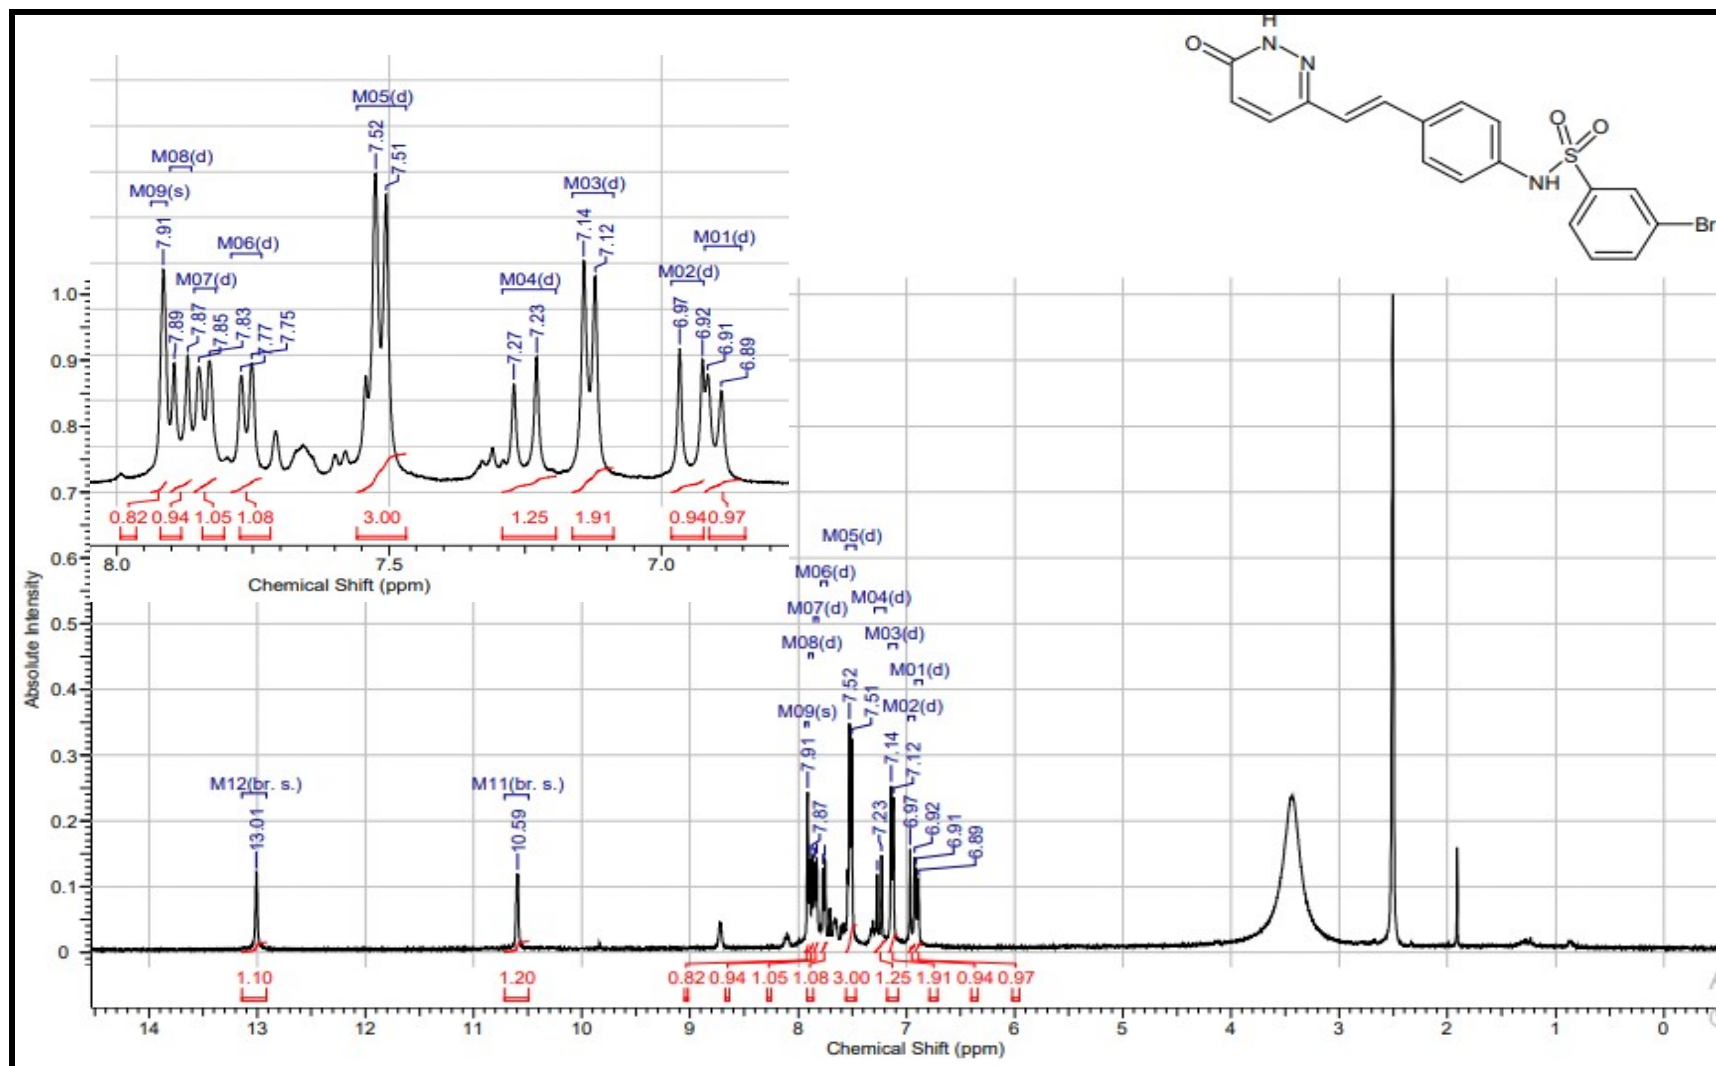

Figure 37. <sup>1</sup>H NMR spectrum (400 MHz) of compound 19a in DMSO-d<sub>6</sub>.

## 5.6. Compound 19b

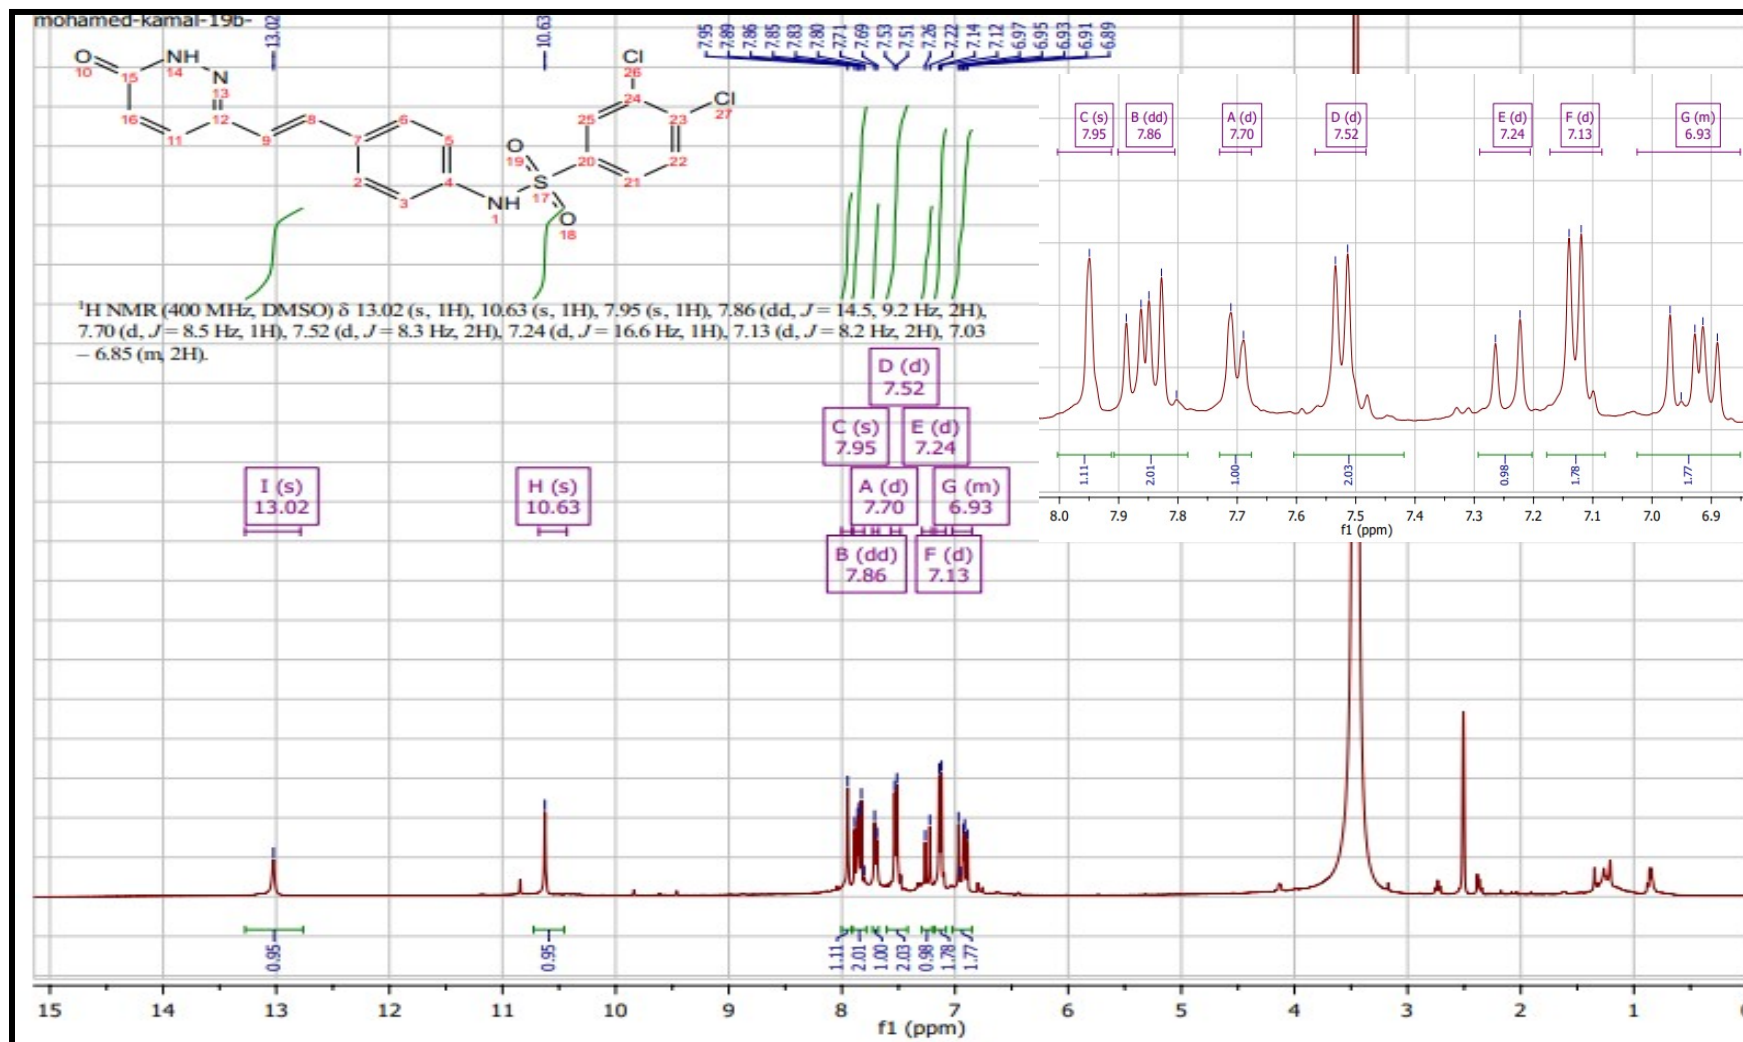

Figure 38. <sup>1</sup>H NMR spectrum (400 MHz) of compound 19b in DMSO-d<sub>6</sub>.



## 6. Elemental analysis of some final compounds

| <b>Elemental Data</b>  |                                       |
|------------------------|---------------------------------------|
| <b>Old code number</b> | <b>New code number</b>                |
| <b>4B</b>              | <b>10a</b>                            |
| <b>5B</b>              | <b>10b</b>                            |
| <b>6B</b>              | <b>10c</b>                            |
| <b>7B</b>              | <b>10d</b>                            |
| <b>8B</b>              | <b>10e</b>                            |
| <b>9B</b>              | <b>Not included in the manuscript</b> |
| <b>10B</b>             | <b>10f</b>                            |
| <b>11B</b>             | <b>10g</b>                            |
| <b>12B</b>             | <b>10h</b>                            |
| <b>14B</b>             | <b>8a</b>                             |
| <b>15B</b>             | <b>8b</b>                             |
| <b>16B</b>             | <b>Not included in the manuscript</b> |
| <b>17B</b>             | <b>10j</b>                            |
| <b>18B</b>             | <b>8c</b>                             |
| <b>19B</b>             | <b>Not included in the manuscript</b> |
| <b>20B</b>             | <b>8d</b>                             |
| <b>21B</b>             | <b>8e</b>                             |

**Al-Azhar University**  
**The Regional Center for Mycology and Biotechnology**

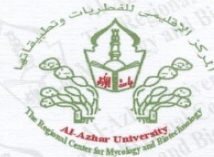

**Requester Data:**

**Name:** Dr.Mohamed Kamal Sayed Elnagar  
**Authority:** Faculty of Pharmacy, Saddat University

**Sample Data:**

Ten samples had been submitted for elemental analysis.

**Analysis Report:**

| Sample Code | C%    | H%   | N%    | S%   |
|-------------|-------|------|-------|------|
| 4B          | 61.94 | 4.21 | 16.25 | 9.23 |
| 5B          | 56.40 | 3.63 | 14.80 | 8.45 |
| 6B          | 50.59 | 3.23 | 13.29 | 7.60 |
| 7B          | 54.90 | 3.47 | 18.00 | 8.23 |
| 8B          | 47.92 | 2.60 | 12.59 | 7.21 |
| 9B          | 67.75 | 3.21 | 17.70 | 0    |
| 10B         | 58.90 | 3.43 | 15.49 | 8.67 |
| 11B         | 58.87 | 3.67 | 15.43 | 8.76 |
| 14B         | 52.40 | 3.23 | 14.59 | 8.34 |
| 15B         | 53.27 | 3.62 | 14.75 | 0    |

**INVESTIGATOR**

*M. Elnagar*  
 جامعة الأزهر  
 المركز الإقليمي للميكروبيولوجيا والبيوتكنولوجيا

**DIRECTOR**

*G. Shalaby*

Al-Azhar University Campus - Nasr City, Cairo, Egypt.  
 Tel: 0202 22620373 Fax : 0202 22620373  
 E-mail:rcmb@azhar.edu.eg  
 Website: <http://www.azhar.edu.eg.htm> \* [http://www.azhar.edu.eg/pages/fungi\\_center.htm](http://www.azhar.edu.eg/pages/fungi_center.htm)  
 Facebook : RCMB AZHAR P.O. box mail : 11751 Nasr City Cairo, Egypt.

**Figure 39a. Report 1 of elemental analysis.**

# Al-Azhar University

## The Regional Center for Mycology and Biotechnology

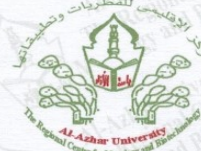

### Requester Data:

**Name:** Dr.Mohamed Kamal Sayed Elnagar  
**Authority:** Faculty of Pharmacy, Saddat University

### Sample Data:

Seven samples had been submitted for elemental analysis.

### Analysis Report:

| Sample Code | C%    | H%   | N%    | S%   |
|-------------|-------|------|-------|------|
| 12B         | 50.57 | 3.22 | 13.29 | 7.55 |
| 16B         | 47.58 | 3.17 | 10.58 | 8.02 |
| 17B         | 53.51 | 3.24 | 14.15 | 8.03 |
| 18B         | 60.17 | 3.98 | 16.72 | 9.60 |
| 19B         | 57.45 | 3.81 | 15.89 | 9.07 |
| 20B         | 48.12 | 2.83 | 13.40 | 7.79 |
| 21B         | 62.82 | 4.15 | 17.51 | 0    |

**INVESTIGATOR**

*M. Elnagar*

**DIRECTOR**

*H. Shehata*

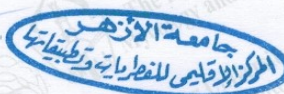

Al-Azhar University Campus - Nasr City, Cairo, Egypt.  
 Tel: 0202 22620373 Fax : 0202 22620373  
 E.mail:rcmb@azhar.edu.eg  
 Website: <http://www.azhar.edu.eg.htm> \* [http://www.azhar.edu.eg/pages/fungi\\_center.htm](http://www.azhar.edu.eg/pages/fungi_center.htm)  
 Facebook : RCMB AZHAR P.O. box mail : 11751 Nasr City Cairo, Egypt.

**Figure 39b. Report 2 of elemental analysis.**

## 7. X-ray powder diffraction (XRD) study:

**Table 1: Crystal structure and lattice parameters of the basic chemical compounds 2, 6 and derivative compounds of 8j, 10h and 11a.**

| Compound                              | 2                       | 6                | 8j          | 10h                   | 11a              |
|---------------------------------------|-------------------------|------------------|-------------|-----------------------|------------------|
| <b>Crystal class</b>                  | Monoclinic              | Triclinic        | Monoclinic  | Monoclinic            | Orthorhombic     |
| a(Å)                                  | 8.875(4)                | 7.612(4)         | 10.960 (2)  | 10.826(2)             | 7.360 (2)        |
| b(Å)                                  | 9.498(1)                | 11.520(2)        | 9.697 (6)   | 9.769(6)              | 7.469 (3)        |
| c(Å)                                  | 11.655(8)               | 11.898(4)        | 13.5885 (8) | 18.349 (4)            | 33.061 (7)       |
| $\alpha(^{\circ})$                    | 90                      | 112.85(2)        | 90          | 90                    | 90               |
| $\beta(^{\circ})$                     | 110.97(4)               | 102.06(2)        | 98.644 (9)  | 98.644                | 90               |
| $\gamma(^{\circ})$                    | 90                      | 96.57(2)         | 90          | 90                    | 90               |
| Volume of Unit cell (Å <sup>3</sup> ) | 917.39                  | 920.34           | 1428.3      | 1918.53               | 1817.5           |
| Density, (g cm <sup>-3</sup> )        | <i>P2<sub>1</sub>/a</i> | 1.4              | 1.57        | <i>P2<sub>1</sub></i> | 1.36             |
| Space group                           | 1.40                    | P1               | P2,         | 1.57                  | Phca             |
| Crystal size (mm)                     | 0.4 × 0.5 × 0.65        | 0.4 × 0.5 × 0.65 |             | 0.75 × 0.5 × 0.3      | 0.4 × 0.15 × 0.8 |

## 8. Biological results

### 8.1. Antimicrobial screening

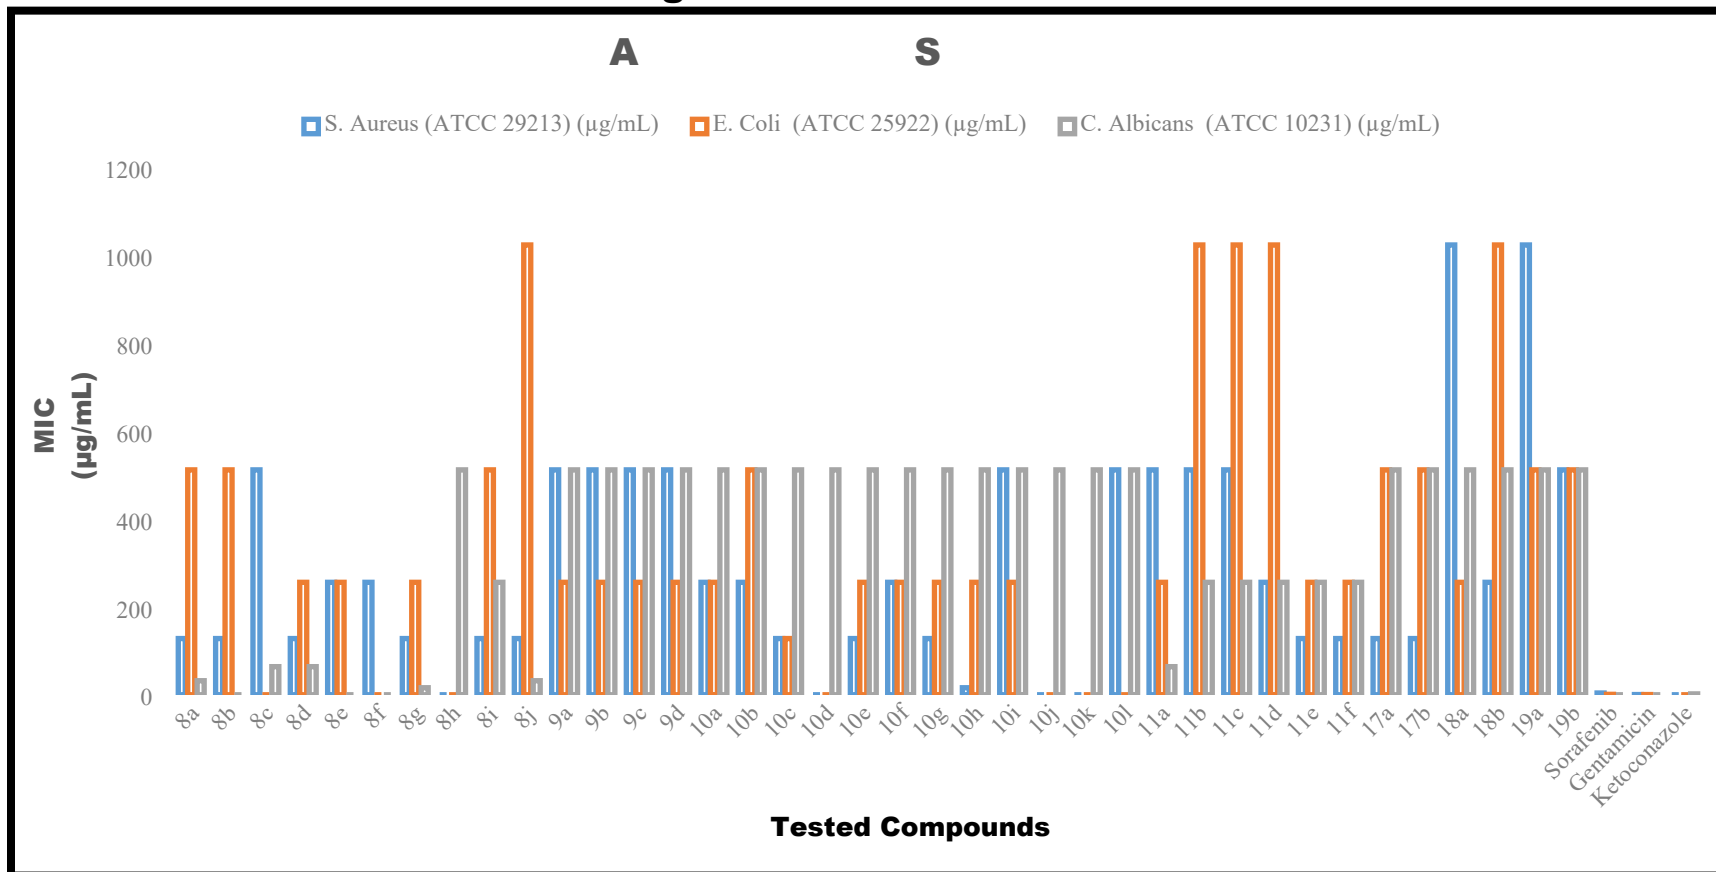

**Figure 40. Antimicrobial screening of the tested compounds against *S. aureus*, *E. Coli* and *C. albicans* strains.**

## 8.2. Antiproliferative results

### 8.2.1. Anti-VEGFR-2 screening

| Thermo Fisher Scientific's SelectScreen™ Profiling Service: Single Point Results |               |                                     |                   |               |              |         |                   |                                                      |                                                                                                                                                                                                                                               |                            |             |      |
|----------------------------------------------------------------------------------|---------------|-------------------------------------|-------------------|---------------|--------------|---------|-------------------|------------------------------------------------------|-----------------------------------------------------------------------------------------------------------------------------------------------------------------------------------------------------------------------------------------------|----------------------------|-------------|------|
| SelectScreen Scientist:                                                          |               | Meera Kumar                         |                   |               | Date:        |         | 19-Sep-2023       |                                                      | SSBK-Z-LYTE (Madison, WI USA)                                                                                                                                                                                                                 |                            |             |      |
| Quality Assurance Review:                                                        |               | Kat Smith                           |                   |               | Date:        |         | 19-Sep-2023       |                                                      | Legend                                                                                                                                                                                                                                        |                            |             |      |
|                                                                                  |               |                                     |                   |               |              |         |                   |                                                      | <div style="background-color: #00FFFF; padding: 2px;">&lt; 40% Inhibition</div> <div style="background-color: #00FFFF; padding: 2px;">40% - 80% Inhibition</div> <div style="background-color: #FF0000; padding: 2px;">≥ 80% Inhibition</div> |                            |             |      |
| % Phosphorylation                                                                |               | Pass                                |                   |               |              |         |                   |                                                      |                                                                                                                                                                                                                                               |                            |             |      |
| Z' Determination                                                                 |               | Pass                                |                   |               |              |         |                   |                                                      |                                                                                                                                                                                                                                               |                            |             |      |
| Project #                                                                        | Compound Name | 1X Test Compound Concentration (nM) | [ATP] Tested (µM) | Kinase Tested | % Inhibition |         | % Inhibition mean | Difference Between Data Points<br> Point 1 - Point 2 | Development Reaction Interference                                                                                                                                                                                                             | Test Compound Interference |             | Z'   |
|                                                                                  |               |                                     |                   |               | Point 1      | Point 2 |                   |                                                      |                                                                                                                                                                                                                                               | Coumarin                   | Fluorescein |      |
| SSBK12643_65852                                                                  | Sorafenib     | 10000                               | 10                | KDR (VEGFR2)  | 100          | 103     | 102               | 3                                                    | Pass                                                                                                                                                                                                                                          | Pass                       | Pass        | 0.75 |
| SSBK12643_65852                                                                  | 8a            | 10000                               | 10                | KDR (VEGFR2)  | 38           | 31      | 34                | 7                                                    | Pass                                                                                                                                                                                                                                          | Pass                       | Pass        | 0.75 |
| SSBK12643_65852                                                                  | 8e            | 10000                               | 10                | KDR (VEGFR2)  | 8            | 8       | 8                 | 1                                                    | Pass                                                                                                                                                                                                                                          | Pass                       | Pass        | 0.75 |
| SSBK12643_65852                                                                  | 11c           | 10000                               | 10                | KDR (VEGFR2)  | 14           | 14      | 14                | 1                                                    | Pass                                                                                                                                                                                                                                          | Pass                       | Pass        | 0.75 |
| SSBK12643_65852                                                                  | 11f           | 10000                               | 10                | KDR (VEGFR2)  | 11           | 17      | 14                | 6                                                    | Pass                                                                                                                                                                                                                                          | Pass                       | Pass        | 0.75 |
| SSBK12643_65852                                                                  | 9b            | 10000                               | 10                | KDR (VEGFR2)  | 9            | 4       | 7                 | 5                                                    | Pass                                                                                                                                                                                                                                          | Pass                       | Pass        | 0.75 |
| SSBK12643_65852                                                                  | 9c            | 10000                               | 10                | KDR (VEGFR2)  | 2            | 7       | 5                 | 5                                                    | Pass                                                                                                                                                                                                                                          | Pass                       | Pass        | 0.75 |
| SSBK12643_65852                                                                  | 10j           | 10000                               | 10                | KDR (VEGFR2)  | 29           | 28      | 28                | 1                                                    | Pass                                                                                                                                                                                                                                          | Pass                       | Pass        | 0.75 |
| SSBK12643_65852                                                                  | 10l           | 10000                               | 10                | KDR (VEGFR2)  | 4            | 5       | 5                 | 1                                                    | Pass                                                                                                                                                                                                                                          | Pass                       | Pass        | 0.75 |
| SSBK12643_65852                                                                  | 17a           | 10000                               | 10                | KDR (VEGFR2)  | 62           | 58      | 60                | 4                                                    | Pass                                                                                                                                                                                                                                          | Pass                       | Pass        | 0.75 |
| SSBK12643_65852                                                                  | 17b           | 10000                               | 10                | KDR (VEGFR2)  | 35           | 40      | 38                | 5                                                    | Pass                                                                                                                                                                                                                                          | Pass                       | Pass        | 0.75 |

## 8.2.2. *In vitro* single dose assay of the active synthesized compound

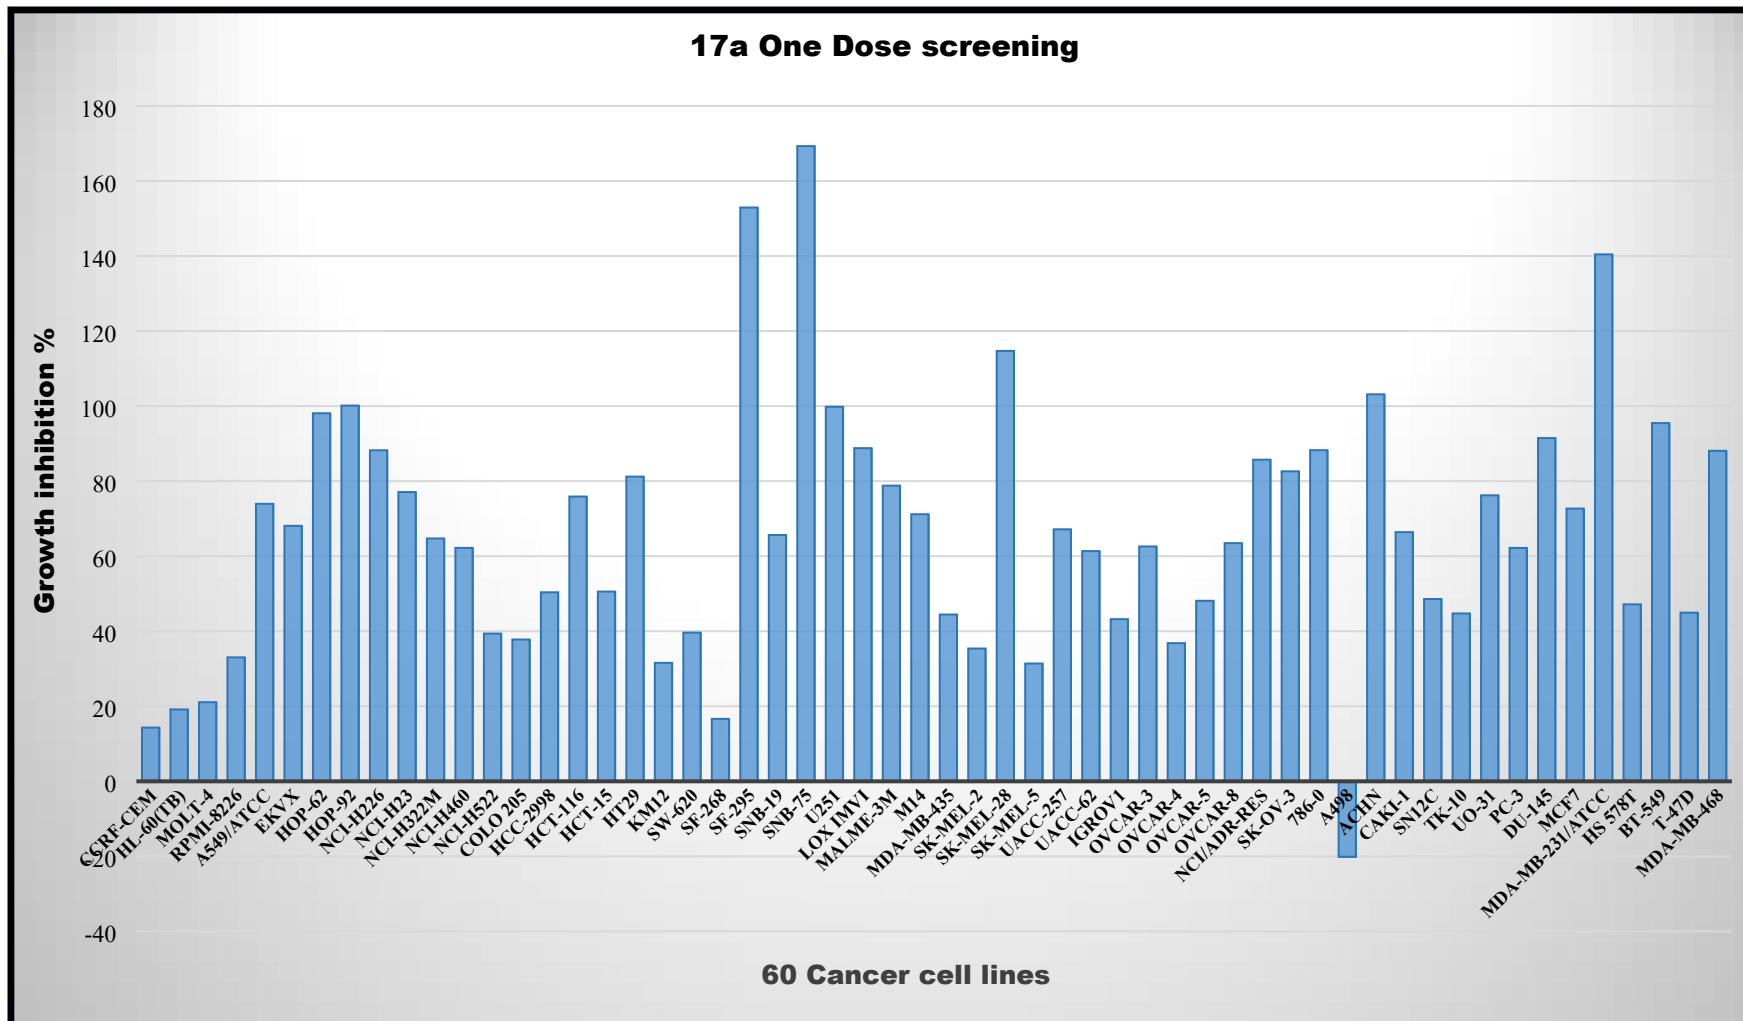

**Figure 41. Growth inhibition % exerted by compound 17a at 10 µM concentration over NCI 60 cell line panel.**

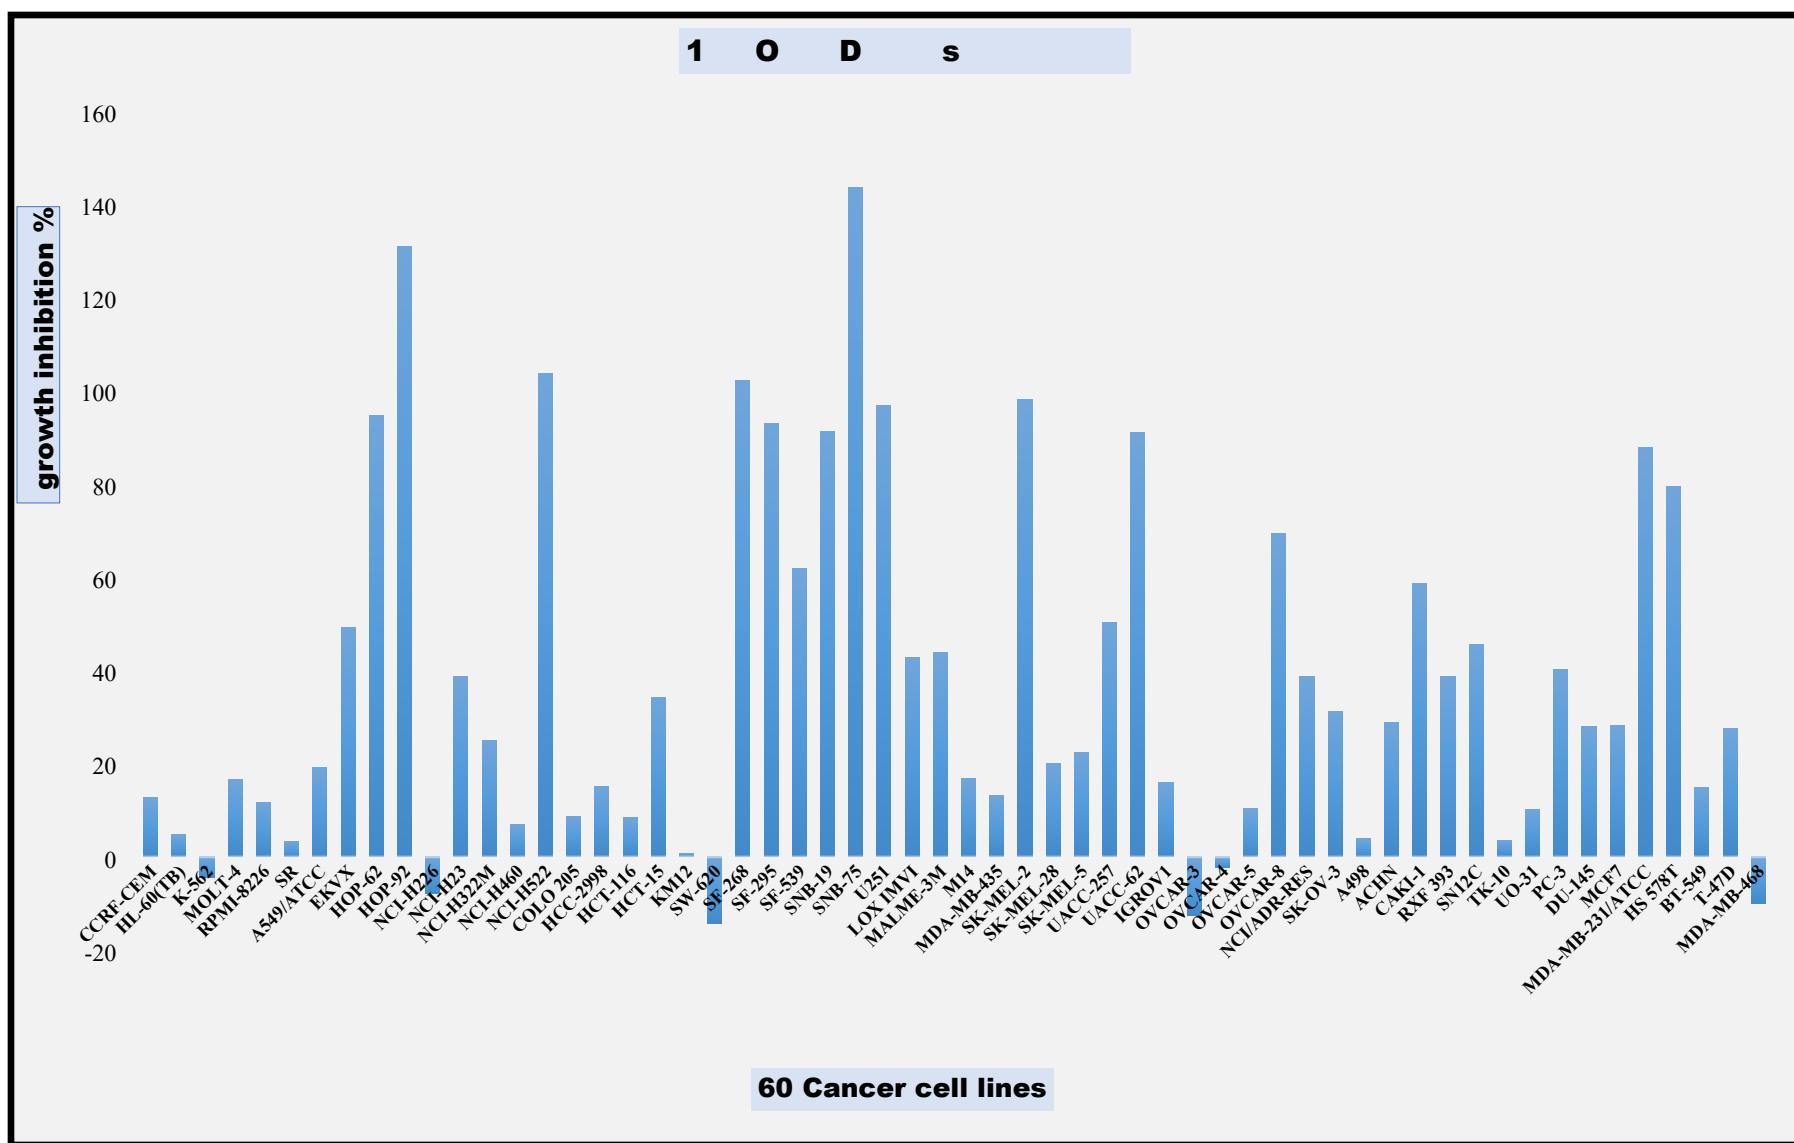

**Figure 42. Growth inhibition % exerted by compound 10l at 10  $\mu$ M concentration over NCI 60 cell line panel.**



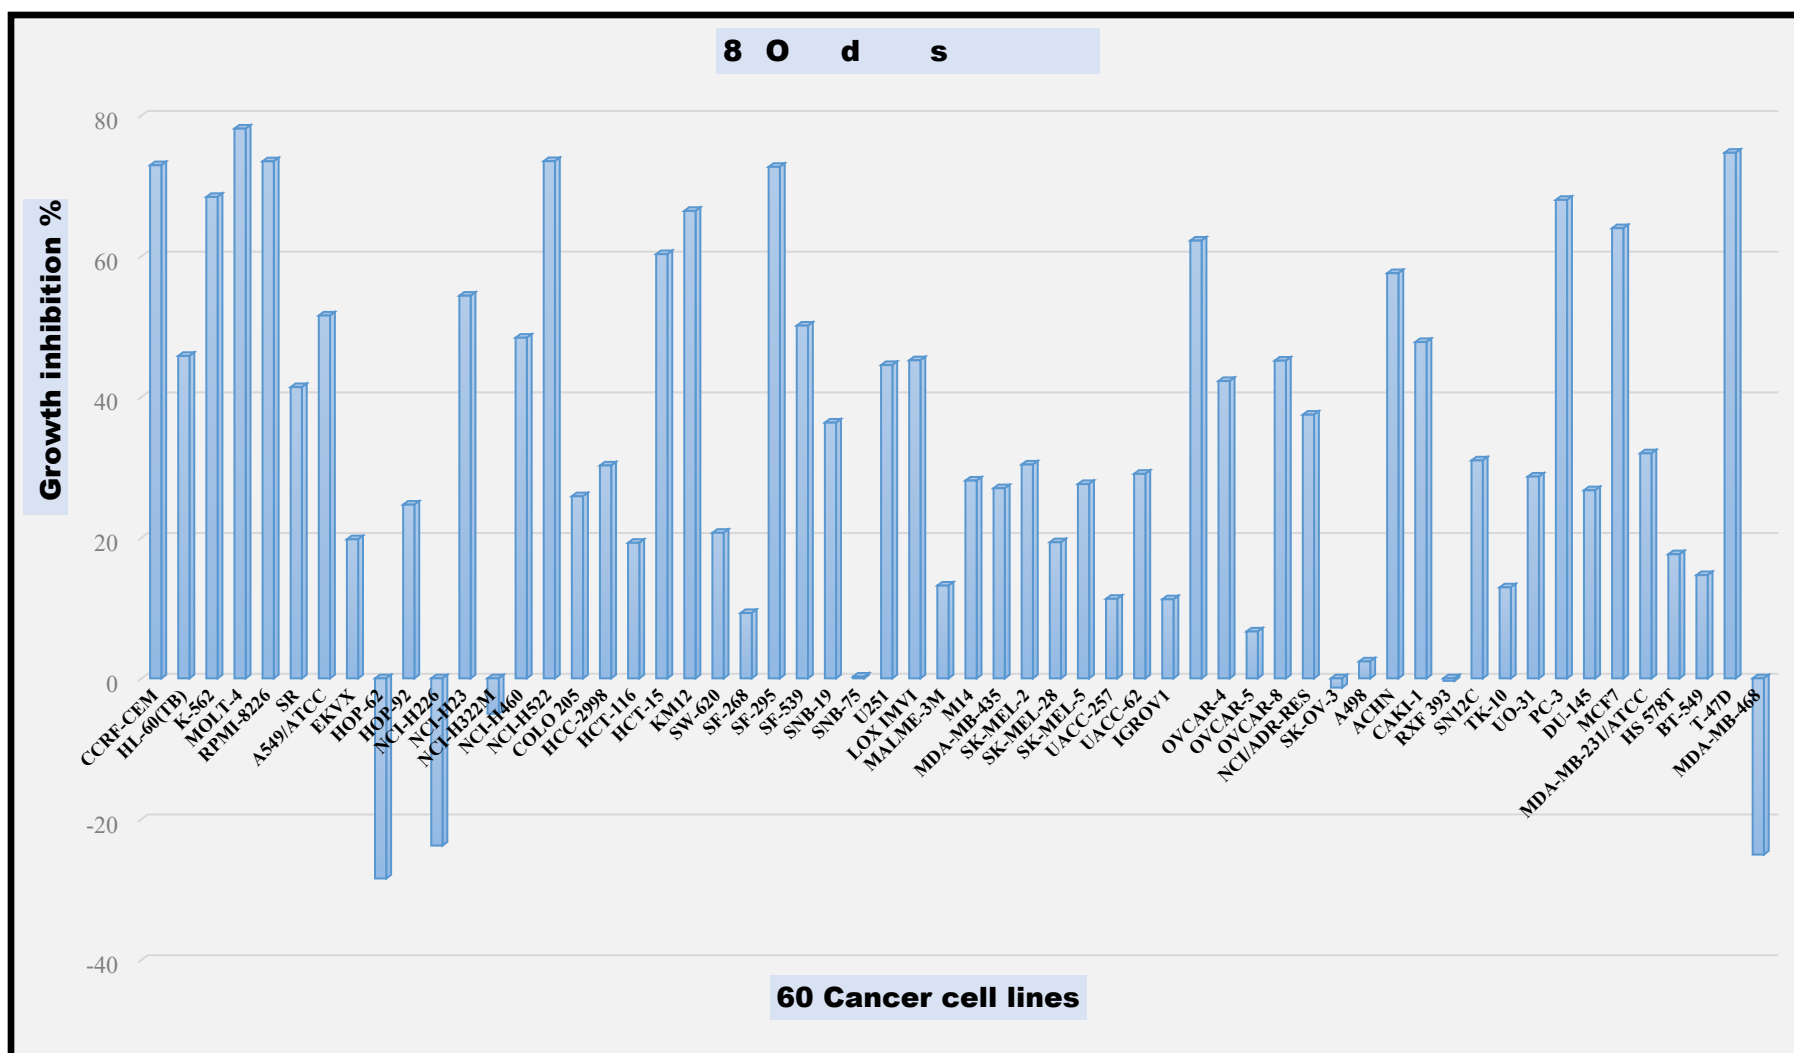

**Figure 43. Growth inhibition % exerted by compound 8f at 10  $\mu$ M concentration over NCI 60 cell line panel.**

**Table 2. Percentage of growth inhibition of NCI 60 cancer cell lines displayed by the final compounds (8a-j and 9a-d).**

| Panel/cell line                   | Percentage of Growth inhibition (GI %) in one-dose assay |       |       |       |       |       |       |       |       |       |       |       |      |       |
|-----------------------------------|----------------------------------------------------------|-------|-------|-------|-------|-------|-------|-------|-------|-------|-------|-------|------|-------|
|                                   | 8a                                                       | 8b    | 8c    | 8d    | 8e    | 8f    | 8g    | 8h    | 8i    | 8j    | 9a    | 9b    | 9c   | 9d    |
| <b>Leukemia</b>                   |                                                          |       |       |       |       |       |       |       |       |       |       |       |      |       |
| CCRF-CEM                          | 46.06                                                    | 26.56 | 10.39 | 11.96 | 1.94  | 72.94 | 20.9  | 9.51  | 12.22 | 9.46  | 6.15  | 23.06 | NI ° | NI °  |
| HL-60 (TB)                        | 21.84                                                    | 12.8  | NI °  | 7.37  | NI °  | 45.83 | NI °  | 5.35  | 2.24  | 10.71 | 9.15  | 12.21 | 2.14 | 0.18  |
| K-562                             | 67.99                                                    | 52.27 | 10.98 | 22.98 | 3.25  | 68.43 | 25.99 | 4.4   | 26.46 | 21.46 | 7.65  | 34.89 | NI ° | NI °  |
| MOLT-4                            | 58.82                                                    | 41.1  | 7.9   | 13.46 | 5.06  | 78.14 | 27.57 | 15.53 | 15.88 | 18.51 | 0.77  | 25.58 | 2.17 | NI °  |
| RPMI-8226                         | 59.24                                                    | 53.35 | 12.51 | 36.32 | 5.46  | 73.49 | 25.09 | 11.48 | 13.85 | 25    | 19.53 | 9.03  | NI ° | 5.50  |
| SR                                | 34.3                                                     | 36.62 | 10.71 | 36.6  | 12.35 | 41.4  | 14.09 | 13.39 | 23.45 | 25.45 | 10.46 | 63.34 | 8.79 | 8.53  |
| <b>Non-small cell lung cancer</b> |                                                          |       |       |       |       |       |       |       |       |       |       |       |      |       |
| A549/ATCC                         | 41.72                                                    | 36.51 | NI °  | 21.45 | 7.29  | 51.57 | 10.47 | 8.211 | 15.68 | 11.22 | 1.18  | NI °  | 3.96 | 6.35  |
| EKVX                              | 12.81                                                    | 13.45 | NI °  | 11.98 | 0.57  | 19.77 | 9.17  | NI °  | 7.7   | NI °  | 5.49  | NI °  | NI ° | NI °  |
| HOP-62                            | NI °                                                     | NI °  | NI °  | 2.6   | NI °  | NI °  | 2.95  | NI °  | NI ° | NI °  |
| HOP-92                            | 16.6                                                     | NI °  | NI °  | 27.05 | 10.32 | 24.69 | 9.45  | 2.73  | 5.2   | NI °  | 7.20  | NI °  | 1.73 | 5.72  |
| NCI-H226                          | 31.13                                                    | NI °  | 16.27 | 0.86  | NI °  | 24.85 | NI °  | NI ° | 9.06  |
| NCI-H23                           | 13.63                                                    | 23.86 | NI °  | 9.85  | NI °  | 54.39 | 5.49  | 7.64  | 4.64  | NI °  | 6.61  | 0.62  | NI ° | 3.16  |
| NCI-H322M                         | 15.86                                                    | NI °  | 1.11  | NI °  | NI ° | NI °  |
| NCI-H460                          | 15.76                                                    | 26.8  | 5.73  | 21.45 | 7.29  | 51.57 | 10.47 | 8.211 | 15.68 | 11.22 | NI °  | NI °  | NI ° | NI °  |
| NCI-H522                          | 50.48                                                    | 55.06 | 3.45  | 11.98 | 0.57  | 19.77 | 9.17  | NI °  | 7.7   | NI °  | 8.70  | NI °  | 4.92 | 20.42 |
| <b>Colon cancer</b>               |                                                          |       |       |       |       |       |       |       |       |       |       |       |      |       |
| COLO 205                          | 2.39                                                     | NI °  | NI °  | 4.19  | NI °  | 25.88 | NI °  | 4.14  | 0.73 | NI °  |
| HCC-2998                          | 26.84                                                    | 2.18  | NI °  | NI °  | NI °  | 30.26 | NI °  | NI ° | NI °  |
| HCT-116                           | 20.9                                                     | 8.45  | NI °  | 6.33  | NI °  | 19.27 | NI °  | NI °  | 14.62 | 0.64  | NI °  | NI °  | NI ° | NI °  |
| HCT-15                            | 24.5                                                     | 28.64 | 3.78  | 11.42 | 9.79  | 60.3  | 1.58  | 4.85  | 10.36 | 1.43  | 3.52  | 5.12  | NI ° | NI °  |
| KM12                              | 41.09                                                    | 55.15 | NI °  | 12.29 | 11.56 | 66.44 | 6.77  | 28.23 | 36.68 | 4.61  | NI °  | NI °  | NI ° | NI °  |
| SW-620                            | 4.24                                                     | NI °  | 5.73  | 6.84  | NI °  | 20.69 | NI °  | NI °  | NI °  | NI °  | 0.81  | 0.08  | NI ° | NI °  |
| <b>CNS cancer</b>                 |                                                          |       |       |       |       |       |       |       |       |       |       |       |      |       |
| SF-268                            | 15.31                                                    | 1.16  | 17.15 | 11.45 | -4.95 | 9.29  | 6.6   | NI °  | 0.71  | 0.27  | 4.32  | 0.64  | NI ° | 38.25 |
| SF-295                            | 33.32                                                    | 38.7  | 6.2   | 6.81  | 16.98 | 72.7  | 3.87  | NI °  | 3.32  | 1.14  | 13.94 | 13.14 | NI ° | NI °  |
| SF-539                            | 19.68                                                    | 34.23 | 4.44  | 10.14 | 6.67  | 50.14 | 9     | 4.6   | 14.25 | 6.65  | NI °  | 0.95  | NI ° | 2.15  |

| Compound No.          | 8a              | 8b              | 8c              | 8d              | 8e              | 8f              | 8g              | 8h              | 8i              | 8j              | 9a              | 9b              | 9c              | 9d              |
|-----------------------|-----------------|-----------------|-----------------|-----------------|-----------------|-----------------|-----------------|-----------------|-----------------|-----------------|-----------------|-----------------|-----------------|-----------------|
| <b>CNS cancer</b>     |                 |                 |                 |                 |                 |                 |                 |                 |                 |                 |                 |                 |                 |                 |
| SNB-19                | 26.94           | 21.22           | 8.17            | 9.64            | 5.27            | 36.35           | 11.75           | 2.37            | 9.61            | 7.34            | 9.52            | 13.52           | 3.61            | 24.16           |
| SNB-75                | 27.8            | 23.68           | 5.51            | 21.68           | 20.49           | 0.25            | 12.44           | 17.72           | 36.26           | 12.96           | 11.08           | NI <sup>c</sup> | 0.24            | 28.85           |
| U251                  | 31.65           | 25.12           | NI <sup>c</sup> | 12.98           | 5.66            | 44.54           | 4.88            | 0.95            | 9.93            | 2.91            | 0.06            | 8.47            | NI <sup>c</sup> | 18.44           |
| <b>Melanoma</b>       |                 |                 |                 |                 |                 |                 |                 |                 |                 |                 |                 |                 |                 |                 |
| LOX IMVI              | NI <sup>c</sup> | 17.74           | 0.6             | 16.28           | 2.76            | 45.26           | 1.13            | 1.82            | 5.17            | 3.43            | 6.93            | 8.07            | 5.75            | 11.94           |
| MALME-3M              | 22.26           | 7.47            | NI <sup>c</sup> | NI <sup>c</sup> | NI <sup>c</sup> | 13.18           | 0.29            | NI <sup>c</sup> | NI <sup>c</sup> | NI <sup>c</sup> | 1.62            | NI <sup>c</sup> | NI <sup>c</sup> | 1.68            |
| M14                   | 21.03           | 2.42            | 12.79           | NI <sup>c</sup> | NI <sup>c</sup> | 28.11           | 1.64            | NI <sup>c</sup> | 1.55            | NI <sup>c</sup> | NI <sup>c</sup> | 34.75           | NI <sup>c</sup> | 2.44            |
| MDA-MB-435            | 9.58            | 12.29           | NI <sup>c</sup> | 4.92            | 2.94            | 27.03           | 9.63            | 4.72            | 1.77            | 1.3             | 3.75            | NI <sup>c</sup> | NI <sup>c</sup> | 0.26            |
| SK-MEL-2              | 7.38            | NI <sup>c</sup> | NI <sup>c</sup> | NI <sup>c</sup> | NI <sup>c</sup> | 30.39           | NI <sup>c</sup> | NI <sup>c</sup> | 4.46            | NI <sup>c</sup> |
| SK-MEL-28             | 43.36           | 9.41            | NI <sup>c</sup> | 4.06            | NI <sup>c</sup> | 19.35           | NI <sup>c</sup> | 3.33            | NI <sup>c</sup> | NI <sup>c</sup> |
| SK-MEL-5              | 12.96           | 2.46            | 7.06            | 32.27           | 3.49            | 27.62           | 21.99           | NI <sup>c</sup> | 6.96            | 8.78            | 16.55           | 5.61            | 7.68            | 5.39            |
| UACC-257              | 38.85           | 8.02            | NI <sup>c</sup> | 16.28           | 2.76            | 45.26           | 1.13            | 1.82            | 5.17            | 3.43            | 3.01            | NI <sup>c</sup> | NI <sup>c</sup> | NI <sup>c</sup> |
| UACC-62               | NI <sup>c</sup> | 26.45           | 7.56            | NI <sup>c</sup> | NI <sup>c</sup> | 13.18           | 0.29            | NI <sup>c</sup> | NI <sup>c</sup> | NI <sup>c</sup> | 16.27           | 12.68           | 9.56            | 8.3             |
| <b>Ovarian cancer</b> |                 |                 |                 |                 |                 |                 |                 |                 |                 |                 |                 |                 |                 |                 |
| IGROV1                | 5.62            | NI <sup>c</sup> | NI <sup>c</sup> | NI <sup>c</sup> | NI <sup>c</sup> | 11.24           | NI <sup>c</sup> |
| OVCAR-3               | 21.51           | 23.92           | 0.24            | 6.01            | 2.76            | 42.26           | 5.64            | 1.17            | NI <sup>c</sup> | 1.47            | NI <sup>c</sup> | NI <sup>c</sup> | NI <sup>c</sup> | NI <sup>c</sup> |
| OVCAR-4               | 24.31           | 18.62           | NI <sup>c</sup> | 8.49            | 2.76            | 42.26           | 10.76           | 1.17            | 9.65            | 1.47            | 1.59            | 0.79            | NI <sup>c</sup> | NI <sup>c</sup> |
| OVCAR-5               | 3.09            | 7.69            | NI <sup>c</sup> | 7.9             | NI <sup>c</sup> | 45.16           | NI <sup>c</sup> | 16.95           | NI <sup>c</sup> | NI <sup>c</sup> |
| OVCAR-8               | 20.28           | 16.27           | NI <sup>c</sup> | 8.02            | NI <sup>c</sup> | 45.16           | 3.05            | NI <sup>c</sup> | NI <sup>c</sup> | NI <sup>c</sup> | 1.52            | NI <sup>c</sup> | NI <sup>c</sup> | 20.56           |
| NCI/ADR-RES           | 5.62            | 7.66            | NI <sup>c</sup> | 0.54            | NI <sup>c</sup> | 7.44            | NI <sup>c</sup> | NI <sup>c</sup> | 1.64            |
| SK-OV-3               | NI <sup>c</sup> | 10.5            | NI <sup>c</sup> | 3.35            | NI <sup>c</sup> |
| <b>Renal cancer</b>   |                 |                 |                 |                 |                 |                 |                 |                 |                 |                 |                 |                 |                 |                 |
| 786-0                 | NT <sup>a</sup> | NT <sup>a</sup> | 7.65            | NT <sup>a</sup> | 5.76            | NT <sup>a</sup> | NT <sup>a</sup> |
| A498                  | 7.89            | NI <sup>c</sup> | 7.23            | NI <sup>c</sup> | NI <sup>c</sup> | 2.4             | 6.37            | NI <sup>c</sup> | NI <sup>c</sup> | 6.37            | NI <sup>c</sup> | NI <sup>c</sup> | NI <sup>c</sup> | NI <sup>c</sup> |
| ACHN                  | 50.83           | 42.46           | 1.04            | 20.8            | NI <sup>c</sup> | 57.59           | 7.7             | 0.41            | 9.78            | 6.18            | 5.5             | NI <sup>c</sup> | NI <sup>c</sup> | NI <sup>c</sup> |
| CAKI-1                | 35.25           | 24.3            | 14.89           | 15.1            | 2.88            | 47.8            | 16.43           | 6.63            | 11.61           | 10.13           | 8.88            | 18.15           | 5.07            | 15.83           |
| RXF 393               | 29.24           | NI <sup>c</sup> | 13.33           | 14.33           | 5.03            | NI <sup>c</sup> | 20.06           | NI <sup>c</sup> | NI <sup>c</sup> | 5.76            | 34.66           | NI <sup>c</sup> | 11.52           | 14.69           |
| SN12C                 | 17.28           | 4.36            | 13.32           | 15.79           | 11.29           | 30.98           | 9               | 3.56            | 4.97            | 1.5             | 12.55           | 1.95            | NI <sup>c</sup> | 5.98            |
| TK-10                 | 25.85           | NI <sup>c</sup> | NI <sup>c</sup> | NI <sup>c</sup> | NI <sup>c</sup> | 12.93           | 1.69            | NI <sup>c</sup> | NI <sup>c</sup> | 8.07            | NI <sup>c</sup> | NI <sup>c</sup> | NI <sup>c</sup> | NI <sup>c</sup> |
| UO-31                 | NT <sup>a</sup> | NT <sup>a</sup> | 7.65            | 15.91           | 4.27            | 28.68           | 20.29           | 4.6             | 16.22           | 21.01           | 12.75           | NI <sup>c</sup> | 6.198           | 10.01           |

| Compound No.           | 8a              | 8b              | 8c    | 8d              | 8e              | 8f              | 8g              | 8h              | 8i              | 8j              | 9a              | 9b              | 9c              | 9d              |
|------------------------|-----------------|-----------------|-------|-----------------|-----------------|-----------------|-----------------|-----------------|-----------------|-----------------|-----------------|-----------------|-----------------|-----------------|
| <b>Prostate cancer</b> |                 |                 |       |                 |                 |                 |                 |                 |                 |                 |                 |                 |                 |                 |
| PC-3                   | 43.56           | 31.33           | 0.15  | 5.39            | 2.32            | 68.01           | 15.02           | 3.55            | 10.86           | 2.34            | 5.89            | 9.42            | 1.59            | 6.73            |
| DU-145                 | 19.4            | 6.11            | 8.21  | 6.62            | NI <sup>c</sup> | 26.74           | 1.39            | NI <sup>c</sup> | NI <sup>c</sup> | NI <sup>c</sup> | NI <sup>c</sup> | 7.7             | NI <sup>c</sup> | NI <sup>c</sup> |
| <b>Breast cancer</b>   |                 |                 |       |                 |                 |                 |                 |                 |                 |                 |                 |                 |                 |                 |
| MCF7                   | 53.57           | 33.89           | 20.9  | 33.49           | 16.25           | 63.99           | 13.3            | 26.24           | 25.44           | 20.17           | 12.41           | NI <sup>c</sup> | 1.884           | 13.46           |
| MDA-MB-231/ATCC        | 19.91           | 5.24            | 2.21  | 14.42           | NI <sup>c</sup> | 31.99           | 4.62            | NI <sup>c</sup> | 2.38            | NI <sup>c</sup> | 3.42            | 52.19           | NI <sup>c</sup> | 6.38            |
| HS 578T                | 2.11            | 15.62           | 2.19  | 6.35            | 0.52            | 17.64           | 0.8             | 8.3             | 12.45           | NI <sup>c</sup> | 5.75            | 14.62           | NI <sup>c</sup> | 11.51           |
| BT-549                 | 5.16            | NI <sup>c</sup> | 23.57 | 15.11           | NI <sup>c</sup> | 14.67           | NI <sup>c</sup> | NI <sup>c</sup> | NI <sup>c</sup> | 9.22            | 1.25            | NI <sup>c</sup> | NI <sup>c</sup> | NI <sup>c</sup> |
| T-47D                  | 58.91           | 59.22           | 13.3  | 35.67           | 15.92           | 74.71           | 53.92           | 15.72           | 40.99           | 40.26           | 8.75            | NI <sup>c</sup> | NI <sup>c</sup> | 2.11            |
| MDA-MB-468             | NI <sup>c</sup> | NI <sup>c</sup> | 20.9  | NI <sup>c</sup> | 16.22           | 6.89            | NI <sup>c</sup> | NI <sup>c</sup> |

**a: NT:** indicates that this compound was not tested.

**b:** These compounds were selected for **five dose assays**.

**C: NI:** No inhibition effect

**Table 3. Percentage of growth inhibition of NCI 60 cancer cell lines displayed by the final compounds (10a-l)**

| Panel/cell line                   | Percentage of Growth inhibition (GI %) in one-dose assay |                 |                 |                 |                 |                 |                 |                 |                 |                 |                 |                  |
|-----------------------------------|----------------------------------------------------------|-----------------|-----------------|-----------------|-----------------|-----------------|-----------------|-----------------|-----------------|-----------------|-----------------|------------------|
| Compound No.                      | 10a                                                      | 10b             | 10c             | 10d             | 10e             | 10f             | 10g             | 10h             | 10i             | 10j             | 10k             | 10l <sup>b</sup> |
| <b>Leukemia</b>                   |                                                          |                 |                 |                 |                 |                 |                 |                 |                 |                 |                 |                  |
| CCRF-CEM                          | 4.72                                                     | NI <sup>c</sup> | 14.51           | 3.72            | 2.40            | 13.47           | NI <sup>c</sup> | NI <sup>c</sup> | 43.39           | 18.78           | 20.49           | 12.75            |
| HL-60 (TB)                        | NI <sup>c</sup>                                          | 5.88            | 15.25           | 9.81            | NI <sup>c</sup> | 12.39           | 11.83           | 11.05           | 36.8            | 21.15           | 21.02           | 4.71             |
| K-562                             | 6.91                                                     | 10.95           | 49.52           | 8.12            | NI <sup>c</sup> | 17.56           | 0.85            | NI <sup>c</sup> | 23.81           | 71.89           | 43.23           | NI <sup>c</sup>  |
| MOLT-4                            | 15.62                                                    | 1.58            | 9.53            | 13.22           | NI <sup>c</sup> | 6.04            | 2.79            | NI <sup>c</sup> | 19.68           | 26.73           | 38.35           | 16.56            |
| RPMI-8226                         | 33.28                                                    | 8.14            | 23.51           | 14.65           | 2.12            | 13.54           | 6.68            | 3.8             | 39.35           | 14.24           | 48.2            | 11.64            |
| SR                                | 3.11                                                     | 0.59            | 52.03           | 21.51           | 4.52            | 37.74           | 11.40           | NI <sup>c</sup> | 35.17           | 74.55           | 31.41           | 3.25             |
| <b>Non-small cell lung cancer</b> |                                                          |                 |                 |                 |                 |                 |                 |                 |                 |                 |                 |                  |
| A549/ATCC                         | 3.76                                                     | 3.87            | 17.41           | 6.95            | 2.65            | 7.18            | 0.26            | 14.9            | 12.69           | 5.84            | 28.1            | 19.25            |
| EKVX                              | 9.03                                                     | 12.57           | NI <sup>c</sup> | 5.01            | 12.8            | 18.38           | NI <sup>c</sup> | 9.25            | 3.73            | 3.72            | 20.43           | 49.29            |
| HOP-62                            | NI <sup>c</sup>                                          | NI <sup>c</sup> | NI <sup>c</sup> | NI <sup>c</sup> | NI <sup>c</sup> | 5.15            | NI <sup>c</sup> | 11.5            | NI <sup>c</sup> | 10.28           | 12.03           | 94.61            |
| HOP-92                            | 21.87                                                    | NI <sup>c</sup> | 6.09            | 0.45            | 3.47            | 27.33           | NI <sup>c</sup> | 25.81           | NI <sup>c</sup> | 12.61           | 11.46           | 130.9            |
| NCI-H226                          | 7.87                                                     | 7.68            | NI <sup>c</sup> | 17.02           | NI <sup>c</sup> | NI <sup>c</sup> | NI <sup>c</sup> | NI <sup>c</sup> | 5.1             | 10.24           | 17.56           | NI <sup>c</sup>  |
| NCI-H23                           | 2.73                                                     | NI <sup>c</sup> | 6.1             | 1.81            | 7.92            | 19.33           | NI <sup>c</sup> | 3.97            | 7.14            | 15.24           | 49.11           | 38.64            |
| NCI-H322M                         | NI <sup>c</sup>                                          | NI <sup>c</sup> | NI <sup>c</sup> | NI <sup>c</sup> | NI <sup>c</sup> | NI <sup>c</sup> | NI <sup>c</sup> | NI <sup>c</sup> | NI <sup>c</sup> | NI <sup>c</sup> | 15.11           | 25.06            |
| NCI-H460                          | NI <sup>c</sup>                                          | NI <sup>c</sup> | NI <sup>c</sup> | NI <sup>c</sup> | NI <sup>c</sup> | 19.57           | NI <sup>c</sup> | 14.9            | 12.69           | 5.84            | 28.1            | 19.25            |
| NCI-H522                          | 24.96                                                    | 16.35           | 18.17           | 15.37           | 8.03            | 27.1            | 4.77            | 9.25            | 3.73            | 3.72            | 20.43           | 49.29            |
| <b>Colon cancer</b>               |                                                          |                 |                 |                 |                 |                 |                 |                 |                 |                 |                 |                  |
| COLO 205                          | NI <sup>c</sup>                                          | NI <sup>c</sup> | NI <sup>c</sup> | NI <sup>c</sup> | NI <sup>c</sup> | 4.1             | NI <sup>c</sup> | NI <sup>c</sup> | NI <sup>c</sup> | NI <sup>c</sup> | 0.59            | 8.59             |
| HCC-2998                          | NI <sup>c</sup>                                          | NI <sup>c</sup> | NI <sup>c</sup> | 1.52            | NI <sup>c</sup> | 0.14            | NI <sup>c</sup> | NI <sup>c</sup> | NI <sup>c</sup> | 20.41           | NI <sup>c</sup> | 15.01            |
| HCT-116                           | NI <sup>c</sup>                                          | NI <sup>c</sup> | NI <sup>c</sup> | NI <sup>c</sup> | NI <sup>c</sup> | 5.19            | NI <sup>c</sup> | NI <sup>c</sup> | NI <sup>c</sup> | 14.64           | 3.49            | 8.42             |
| HCT-15                            | 8.97                                                     | NI <sup>c</sup> | 1.53            | NI <sup>c</sup> | 0.12            | 11.75           | NI <sup>c</sup> | NI <sup>c</sup> | 19.53           | 54.48           | 45.91           | 34.17            |
| KM12                              | NI <sup>c</sup>                                          | NI <sup>c</sup> | 9.29            | 3.29            | NI <sup>c</sup> | 0.56            | NI <sup>c</sup> | NI <sup>c</sup> | 1.84            | 29.81           | 9.1             | 0.83             |
| SW-620                            | NI <sup>c</sup>                                          | NI <sup>c</sup> | 12.98           | NI <sup>c</sup> | NI <sup>c</sup> | 2.92            | NI <sup>c</sup> | NI <sup>c</sup> | 2.43            | 34.03           | NI <sup>c</sup> | NI <sup>c</sup>  |
| <b>CNS cancer</b>                 |                                                          |                 |                 |                 |                 |                 |                 |                 |                 |                 |                 |                  |
| SF-268                            | NI <sup>c</sup>                                          | NI <sup>c</sup> | 2.0             | 4.34            | NI <sup>c</sup> | 3.71            | NI <sup>c</sup> | 19.66           | NI <sup>c</sup> | 10.58           | 4.41            | 102.2            |
| SF-295                            | 19.35                                                    | NI <sup>c</sup> | 7.31            | NI <sup>c</sup> | 6.52            | 37.22           | NI <sup>c</sup> | NI <sup>c</sup> | 5.8             | 17.07           | 51.42           | 93.03            |
| SF-539                            | 5.14                                                     | 8.66            | 7.59            | 6.51            | 5.18            | 17.86           | 6.57            | 38.33           | 8.83            | 16.39           | 24.46           | 61.85            |
| SNB-19                            | 11.82                                                    | 4.04            | 13.70           | 5.33            | 14.6            | 13.46           | 2.22            | 34.98           | 10.19           | 25.74           | 22.06           | 91.19            |
| SNB-75                            | 22.59                                                    | 20.92           | 7.67            | 24.55           | 13.27           | 14.76           | 12.83           | 15.58           | 9.6             | 27.37           | 12.55           | 143.6            |

| Compound No.           | 10a             | 10b             | 10c             | 10d             | 10e             | 10f             | 10g             | 10h             | 10i             | 10j             | 10k             | 10l <sup>b</sup> |
|------------------------|-----------------|-----------------|-----------------|-----------------|-----------------|-----------------|-----------------|-----------------|-----------------|-----------------|-----------------|------------------|
| U251                   | NI <sup>c</sup> | 3.47            | 5.20            | 6.05            | NI <sup>c</sup> | 12.73           | NI <sup>c</sup> | 29.41           | 5.9             | 10.2            | 22.79           | 96.91            |
| <b>Melanoma</b>        |                 |                 |                 |                 |                 |                 |                 |                 |                 |                 |                 |                  |
| LOX IMVI               | 15.48           | 21.23           | 15.28           | 12.61           | 4.02            | 15.63           | 4.62            | 15.54           | 29.62           | 27.24           | 31.04           | 42.87            |
| MALME-3M               | NI <sup>c</sup> | 4.41            | 13.28           | 1.43            | NI <sup>c</sup> | 43.82            |
| M14                    | 11.34           | NI <sup>c</sup> | 10.07           | NI <sup>c</sup> | NI <sup>c</sup> | 16.81           | 0.56            | NI <sup>c</sup> | NI <sup>c</sup> | 40.25           | 2.87            | 16.83            |
| MDA-MB-435             | 9.07            | NI <sup>c</sup> | 51.48           | 1.35            | NI <sup>c</sup> | 12.28           | NI <sup>c</sup> | 11.8            | 11.38           | 88.03           | 14.16           | 13.25            |
| SK-MEL-2               | 0.62            | NI <sup>c</sup> | NI <sup>c</sup> | 5.02            | NI <sup>c</sup> | 3.76            | NI <sup>c</sup> | NI <sup>c</sup> | NI <sup>c</sup> | 13.1            | 5.08            | 98.03            |
| SK-MEL-28              | NI <sup>c</sup> | NI <sup>c</sup> | NI <sup>c</sup> | NI <sup>c</sup> | 7.43            | 0.4             | NI <sup>c</sup> | 1.01            | NI <sup>c</sup> | 21.85           | 14.11           | 20               |
| SK-MEL-5               | 16.25           | 22.57           | 15.34           | 6.52            | 27.9            | 17.63           | 5.43            | 28.41           | 8.27            | 25.93           | 49.08           | 22.47            |
| UACC-257               | NI <sup>c</sup> | 11.77           | 9.06            | 0.71            | NI <sup>c</sup> | 2.41            | 0.85            | 12.67           | 7.51            | 0.12            | 3.68            | 50.24            |
| UACC-62                | 20.63           | 18.69           | 28.42           | 17.27           | 7.95            | 15.89           | 7.19            | 15.72           | 16.5            | 36.49           | 39.16           | 91.02            |
| <b>Ovarian cancer</b>  |                 |                 |                 |                 |                 |                 |                 |                 |                 |                 |                 |                  |
| IGROV1                 | NI <sup>c</sup> | 5.38            | NI <sup>c</sup> | 15.94            |
| OVCAR-3                | 2.76            | NI <sup>c</sup> | 22.03           | 7.53            | NI <sup>c</sup>  |
| OVCAR-4                | 7.71            | 1.49            | 6.86            | NI <sup>c</sup> | 3.47            | 11.07           | NI <sup>c</sup> | 45.23           | 0.8             | NI <sup>c</sup> | 13.19           | NI <sup>c</sup>  |
| OVCAR-5                | 2.64            | NI <sup>c</sup> | NI <sup>c</sup> | NI <sup>c</sup> | 1               | 9.93            | NI <sup>c</sup> | NI <sup>c</sup> | 2.82            | 8.82            | 19.61           | 10.38            |
| OVCAR-8                | 3.17            | 0.43            | 5.38            | NI <sup>c</sup> | NI <sup>c</sup> | 6.61            | NI <sup>c</sup> | 31.91           | 0.97            | 2.95            | 19.06           | 69.34            |
| NCI/ADR-RES            | 1.06            | 4.16            | 14.06           | NI <sup>c</sup> | NI <sup>c</sup> | NI <sup>c</sup> | NI <sup>c</sup> | 33.2            | 3.88            | 22.2            | 45.67           | 38.65            |
| SK-OV-3                | NI <sup>c</sup> | NI <sup>c</sup> | NI <sup>c</sup> | 11.1            | NI <sup>c</sup> | NI <sup>c</sup> | 5.98            | NI <sup>c</sup> | 6.88            | 2.46            | 0.2             | 31.22            |
| <b>Renal cancer</b>    |                 |                 |                 |                 |                 |                 |                 |                 |                 |                 |                 |                  |
| 786-0                  | NT <sup>a</sup> | 87.42           | NT <sup>a</sup> | NT <sup>a</sup>  |
| A498                   | NI <sup>c</sup> | 0.69            | NI <sup>c</sup> | NI <sup>c</sup> | NI <sup>c</sup> | 12.94           | NI <sup>c</sup> | 3.86             |
| ACHN                   | 13.55           | 5.95            | NI <sup>c</sup> | 5.17            | 6.19            | 5.35            | NI <sup>c</sup> | 10.77           | 2.08            | 14.44           | 15.51           | 28.91            |
| CAKI-1                 | 15.23           | 5.83            | 18.72           | 15.7            | 11.38           | 15.54           | 8.81            | 18.38           | 11.26           | 18.21           | 12.59           | 58.56            |
| RXF 393                | 20.6            | NI <sup>c</sup> | 11.3            | NI <sup>c</sup> | 13.13           | 30.93           | NI <sup>c</sup> | 18.31           | 3.14            | 32.42           | 15.89           | 38.74            |
| SN12C                  | 7.86            | 0.21            | 8.72            | 3.89            | 8.49            | 22.73           | NI <sup>c</sup> | 14.1            | 0.25            | 10.74           | 28.99           | 45.47            |
| TK-10                  | NI <sup>c</sup> | 3.60             |
| UO-31                  | 21.43           | 32.44           | 13.77           | 34.5            | 11.65           | 21.92           | 12.15           | 9.79            | 13.42           | 17.14           | 28.86           | 10.25            |
| <b>Prostate cancer</b> |                 |                 |                 |                 |                 |                 |                 |                 |                 |                 |                 |                  |
| PC-3                   | 15.15           | 19.99           | 11.33           | 4.07            | 0.48            | 9.97            | NI <sup>c</sup> | 11.75           | 2.84            | 8.97            | 36.85           | 40.25            |
| DU-145                 | NI <sup>c</sup> | 1.12            | NI <sup>c</sup> | NI <sup>c</sup> | NI <sup>c</sup> | 2.95            | 1.92            | 28.06            |
| <b>Breast cancer</b>   |                 |                 |                 |                 |                 |                 |                 |                 |                 |                 |                 |                  |
| MCF7                   | 26.04           | 18.25           | 18.13           | 16.8            | 12.67           | 9.62            | 10.52           | 5.48            | 8.68            | 48.98           | 33.36           | 28.13            |
| MDA-MB-231/ATCC        | 11.39           | 8.16            | 2.64            | NI <sup>c</sup> | 10.34           | 14.64           | NI <sup>c</sup> | 16.02           | NI <sup>c</sup> | 23.7            | 15.14           | 87.74            |
| HS 578T                | 4.84            | 14.3            | 10.93           | 5.3             | NI <sup>c</sup> | NI <sup>c</sup> | NI <sup>c</sup> | 17.94           | NI <sup>c</sup> | 14.75           | 10.57           | 79.37            |

| Compound No. | 10a             | 10b             | 10c             | 10d             | 10e             | 10f   | 10g             | 10h             | 10i             | 10j   | 10k             | 10l <sup>b</sup> |
|--------------|-----------------|-----------------|-----------------|-----------------|-----------------|-------|-----------------|-----------------|-----------------|-------|-----------------|------------------|
| BT-549       | 1.38            | NI <sup>c</sup> | NI <sup>c</sup> | NI <sup>c</sup> | 4.07            | 13.67 | NI <sup>c</sup> | NI <sup>c</sup> | NI <sup>c</sup> | 22.74 | 4.89            | 14.89            |
| T-47D        | 28.42           | 27.71           | 12.85           | 14.9            | NI <sup>c</sup> | 24.08 | 11.69           | 18.57           | 8.81            | 42.3  | 30.92           | 27.54            |
| MDA-MB-468   | NI <sup>c</sup> | NI <sup>c</sup> | NI <sup>c</sup> | NI <sup>c</sup> | 8.84            | 0.94  | NI <sup>c</sup> | NI <sup>c</sup> | 15.12           | 48.98 | NI <sup>c</sup> | NI <sup>c</sup>  |

**a: NT:** indicates that this compound was not tested.

**b:** These compounds were selected for **five dose assays**.

**c: NI:** No inhibition effect

**Table 4. Percentage of growth inhibition of NCI 60 cancer cell lines displayed by the final compounds (11a-f, 17a-b, 18a-b and 19a-b).**

| Panel/cell line                   | Percentage of Growth inhibition (GI %) in one-dose assay |                 |                 |                 |                 |                 |                  |                 |                 |                 |                 |                 |
|-----------------------------------|----------------------------------------------------------|-----------------|-----------------|-----------------|-----------------|-----------------|------------------|-----------------|-----------------|-----------------|-----------------|-----------------|
|                                   | 11a                                                      | 11b             | 11c             | 11d             | 11e             | 11f             | 17a <sup>b</sup> | 17b             | 18a             | 18b             | 19a             | 19b             |
| <b>Leukemia</b>                   |                                                          |                 |                 |                 |                 |                 |                  |                 |                 |                 |                 |                 |
| CCRF-CEM                          | 10.16                                                    | 12.55           | 3.14            | 6.07            | 8.18            | 6.84            | 14.32            | 6.22            | 16.05           | 13.80           | 25.88           | 28.39           |
| HL-60 (TB)                        | NI <sup>c</sup>                                          | 8.87            | NI <sup>c</sup> | NI <sup>c</sup> | 3.25            | NI <sup>c</sup> | 19.16            | 20.74           | 4.13            | NI <sup>c</sup> | 6.52            | 1.39            |
| K-562                             | 12.16                                                    | 9.23            | NI <sup>c</sup> | 12.3            | 16.64           | 15.22           | NT <sup>a</sup>  | NT <sup>a</sup> | NT <sup>a</sup> | NT <sup>a</sup> | NT <sup>a</sup> | NT <sup>a</sup> |
| MOLT-4                            | 7.01                                                     | 34.65           | NI <sup>c</sup> | 7.12            | 11.79           | 6.91            | 21.08            | 8.21            | 23.34           | 9.25            | 8.54            | 15.61           |
| RPMI-8226                         | 27.72                                                    | 28.6            | 8.19            | 21.41           | 23.27           | 15.48           | 33.03            | 6.22            | 19.77           | 16.34           | 22.64           | 30.27           |
| SR                                | 25.18                                                    | 24.81           | 7.46            | 29.47           | 25.6            | 12.69           | NT <sup>a</sup>  | NT <sup>a</sup> | NT <sup>a</sup> | NT <sup>a</sup> | NT <sup>a</sup> | NT <sup>a</sup> |
| <b>Non-small cell lung cancer</b> |                                                          |                 |                 |                 |                 |                 |                  |                 |                 |                 |                 |                 |
| A549/ATCC                         | 8.52                                                     | 11.66           | 3.72            | 13.11           | 7.2             | 5.68            | <u>73.95</u>     | NI <sup>c</sup> | 7.69            | NI <sup>c</sup> | NI <sup>c</sup> | 0.89            |
| EKVX                              | 10.46                                                    | 3.11            | 11              | 11.14           | 9.49            | NI <sup>c</sup> | 68.08            | 13.22           | NI <sup>c</sup> | 10.29           | 13.13           | 21.82           |
| HOP-62                            | 8.83                                                     | 3.36            | NI <sup>c</sup> | NI <sup>c</sup> | NI <sup>c</sup> | NI <sup>c</sup> | <u>98.09</u>     | NI <sup>c</sup> | NI <sup>c</sup> | NI <sup>c</sup> | 6.97            | 17.26           |
| HOP-92                            | 8.63                                                     | 12.93           | 7.39            | 13.16           | 25.22           | 10.03           | <u>100.14</u>    | NI <sup>c</sup> | NI <sup>c</sup> | NI <sup>c</sup> | 43.16           | 44.69           |
| NCI-H226                          | NI <sup>c</sup>                                          | 16.32           | 17.57           | NI <sup>c</sup> | NI <sup>c</sup> | 18.44           | <u>88.22</u>     | NI <sup>c</sup> | NI <sup>c</sup> | 2.46            | 16.26           | 18.58           |
| NCI-H23                           | 9.6                                                      | 12.64           | 0.78            | 9.83            | 16.25           | 0.25            | <u>77.09</u>     | 7.29            | 2.68            | 4.53            | 8.85            | 11.84           |
| NCI-H322M                         | NI <sup>c</sup>                                          | 5.26            | 7.9             | NI <sup>c</sup> | NI <sup>c</sup> | NI <sup>c</sup> | 64.72            | NI <sup>c</sup> | 0.54            | NI <sup>c</sup> | NI <sup>c</sup> | NI <sup>c</sup> |
| NCI-H460                          | NI <sup>c</sup>                                          | 1.11            | NI <sup>c</sup> | NI <sup>c</sup> | NI <sup>c</sup> | 0.7             | 62.21            | NI <sup>c</sup> | 3.42            | NI <sup>c</sup> | NI <sup>c</sup> | 0.66            |
| NCI-H522                          | 8.52                                                     | 11.66           | 3.72            | 13.11           | 7.2             | 5.68            | 39.38            | 8.89            | 6.50            | 3.079           | 10.74           | 20.22           |
| <b>Colon Cancer</b>               |                                                          |                 |                 |                 |                 |                 |                  |                 |                 |                 |                 |                 |
| COLO 205                          | NI <sup>c</sup>                                          | 1.92            | 6.39            | NI <sup>c</sup> | NI <sup>c</sup> | 2.30            | 37.79            | NI <sup>c</sup> |
| HCC-2998                          | NI <sup>c</sup>                                          | NI <sup>c</sup> | NI <sup>c</sup> | NI <sup>c</sup> | NI <sup>c</sup> | NI <sup>c</sup> | 50.38            | NI <sup>c</sup> | NI <sup>c</sup> | NI <sup>c</sup> | NI <sup>c</sup> | 7.56            |
| HCT-116                           | NI <sup>c</sup>                                          | NI <sup>c</sup> | NI <sup>c</sup> | NI <sup>c</sup> | NI <sup>c</sup> | 2.59            | <u>75.90</u>     | 5.63            | 11.08           | 7.16            | 7.98            | 9.37            |
| HCT-15                            | 5.74                                                     | 1.89            | NI <sup>c</sup> | 2.17            | NI <sup>c</sup> | 4.40            | 50.57            | 7.03            | 10.45           | 2.16            | 4.92            | 11.86           |
| HT29                              | NT <sup>a</sup>                                          | NT <sup>a</sup> | NT <sup>a</sup> | NT <sup>a</sup> | NT <sup>a</sup> | NT <sup>a</sup> | <u>81.21</u>     | NI <sup>c</sup> | NI <sup>c</sup> | NI <sup>c</sup> | 7.35            | NI <sup>c</sup> |
| KM12                              | NI <sup>c</sup>                                          | NI <sup>c</sup> | 1.31            | NI <sup>c</sup> | NI <sup>c</sup> | NI <sup>c</sup> | 31.57            | NI <sup>c</sup> | 9.65            | 6.51            | NI <sup>c</sup> | 2.45            |
| SW-620                            | NI <sup>c</sup>                                          | NI <sup>c</sup> | NI <sup>c</sup> | NI <sup>c</sup> | NI <sup>c</sup> | 2.71            | 39.63            | NI <sup>c</sup> |
| <b>CNS cancer</b>                 |                                                          |                 |                 |                 |                 |                 |                  |                 |                 |                 |                 |                 |
| SF-268                            | NI <sup>c</sup>                                          | NI <sup>c</sup> | NI <sup>c</sup> | NI <sup>c</sup> | NI <sup>c</sup> | NI <sup>c</sup> | 16.64            | NI <sup>c</sup> | NI <sup>c</sup> | NI <sup>c</sup> | NI <sup>c</sup> | 9.15            |
| SF-295                            | 5.04                                                     | 1.95            | NI <sup>c</sup> | 5.91            | 10.50           | 6.6             | 152.92           | NI <sup>c</sup> | 13.85           | 1.08            | 14.25           | 30.14           |
| SF-539                            | 11.30                                                    | 19.67           | 3.44            | 16.53           | 2.43            | 5.29            | NT <sup>a</sup>  | NT <sup>a</sup> | NT <sup>a</sup> | NT <sup>a</sup> | NT <sup>a</sup> | NT <sup>a</sup> |



| Compound No.           | 11a             | 11b             | 11c             | 11d             | 11e             | 11f             | 17a <sup>b</sup> | 17b             | 18a             | 18b             | 19a             | 19b             |
|------------------------|-----------------|-----------------|-----------------|-----------------|-----------------|-----------------|------------------|-----------------|-----------------|-----------------|-----------------|-----------------|
| SNB-19                 | 9.08            | 7.90            | 8.66            | 9.31            | 10.82           | 14.91           | 65.65            | NI <sup>c</sup> | 1.14            | 4.25            | 5.43            | 11.81           |
| SNB-75                 | 18.07           | 18.81           | 23.17           | 14.35           | 14.35           | 16.94           | 169.29           | NI <sup>c</sup> | NI <sup>c</sup> | <u>84.53</u>    | 10.55           | 25.38           |
| U251                   | 6.59            | 3.20            | 8.68            | 3.56            | 5.95            | 10.43           | 99.82            | NI <sup>c</sup> | NI <sup>c</sup> | NI <sup>c</sup> | NI <sup>c</sup> | 0.03            |
| <b>Melanoma</b>        |                 |                 |                 |                 |                 |                 |                  |                 |                 |                 |                 |                 |
| LOX IMVI               | 8.69            | 12.73           | 8.12            | 10.89           | 11.04           | 2.19            | <u>88.79</u>     | NI <sup>c</sup> | 12.30           | 5.55            | 11.04           | 13.49           |
| MALME-3M               | NI <sup>c</sup> | 1.28            | NI <sup>c</sup> | NI <sup>c</sup> | NI <sup>c</sup> | NI <sup>c</sup> | <u>78.80</u>     | NI <sup>c</sup> | 10.73           | 12.26           | 26.11           | 22.35           |
| M14                    | 8.02            | 2               | 6.6             | NI <sup>c</sup> | NI <sup>c</sup> | 0.95            | 71.18            | NI <sup>c</sup> | 0.50            | 2.28            | 3.83            | 4.75            |
| MDA-MB-435             | 1.36            | 8.06            | 6.2             | 0.81            | 5.65            | NI <sup>c</sup> | 44.45            | 2.14            | 0.98            | NI <sup>c</sup> | NI <sup>c</sup> | 1.19            |
| SK-MEL-2               | NI <sup>c</sup> | 3.9             | NI <sup>c</sup> | NI <sup>c</sup> | NI <sup>c</sup> | 2.24            | 35.38            | NI <sup>c</sup> |
| SK-MEL-28              | NI <sup>c</sup> | NI <sup>c</sup> | 1.82            | NI <sup>c</sup> | NI <sup>c</sup> | NI <sup>c</sup> | 114.70           | NI <sup>c</sup> | NI <sup>c</sup> | NI <sup>c</sup> | NI <sup>c</sup> | 3.82            |
| SK-MEL-5               | NI <sup>c</sup> | 21.9            | 20.44           | 19.8            | 12.54           | 11.08           | 31.39            | 2.69            | 4.49            | 8.09            | 14.56           | 20.27           |
| UACC-257               | NI <sup>c</sup> | 6               | 1.42            | NI <sup>c</sup> | 2.91            | 0.96            | 67.16            | NI <sup>c</sup> |
| UACC-62                | 18.9            | 24.94           | 14.44           | 27.84           | 29.57           | 19.38           | 61.36            | 5.86            | 13.68           | 4.15            | 31.18           | 44.05           |
| <b>Ovarian Cancer</b>  |                 |                 |                 |                 |                 |                 |                  |                 |                 |                 |                 |                 |
| IGROV1                 | NI <sup>c</sup> | 43.21            | 4.98            | 7.67            | 6.81            | 15.10           | 17.78           |
| OVCAR-3                | NI <sup>c</sup> | 62.59            | NI <sup>c</sup> | NI <sup>c</sup> | NI <sup>c</sup> | 5.64            | 5.47            |
| OVCAR-4                | 2.55            | 8.27            | NI <sup>c</sup> | 1.74            | NI <sup>c</sup> | NI <sup>c</sup> | 36.82            | NI <sup>c</sup> | NI <sup>c</sup> | NI <sup>c</sup> | 20.18           | 9.84            |
| OVCAR-5                | NI <sup>c</sup> | 48.10            | NI <sup>c</sup> | NI <sup>c</sup> | NI <sup>c</sup> | 9.81            | 12.82           |
| OVCAR-8                | 3.85            | 6.47            | 0.82            | 1.32            | 3.43            | 5.33            | 63.48            | NI <sup>c</sup> | NI <sup>c</sup> | NI <sup>c</sup> | 1.14            | 7.74            |
| NCI/ADR-RES            | NI <sup>c</sup> | 1.68            | NI <sup>c</sup> | 4.39            | 1.36            | 6.02            | <u>85.72</u>     | 0.83            | 2.91            | 3.92            | 8.26            | 11.79           |
| SK-OV-3                | NI <sup>c</sup> | NI <sup>c</sup> | NI <sup>c</sup> | NI <sup>c</sup> | 2.12            | NI <sup>c</sup> | <u>82.62</u>     | NI <sup>c</sup> |
| <b>Renal Cancer</b>    |                 |                 |                 |                 |                 |                 |                  |                 |                 |                 |                 |                 |
| 786-0                  | NT <sup>a</sup> | <u>88.25</u>     | 5.35            | 17.17           | 14.01           | 21.34           | 18.63           |
| A498                   | NI <sup>c</sup> | 2.07            | NI <sup>c</sup> | 2.51            | NI <sup>c</sup> | 4.12            | NI <sup>c</sup>  | NI <sup>c</sup> | 1.03            | 9.20            | 4.87            | 9.72            |
| ACHN                   | 0.8             | 0.16            | 6.41            | 0.38            | NI <sup>c</sup> | 7.91            | 103.14           | NI <sup>c</sup> | 11.40           | 2.46            | 11.27           | 8.44            |
| CAKI-1                 | 9.78            | 15.42           | 12.61           | 15.37           | 16.84           | 4.43            | 66.40            | 11.32           | 24.64           | 9.55            | 40.57           | 38.22           |
| RXF 393                | 0.15            | 0.76            | 7.67            | 29.53           | 34.88           | 24.31           | NT <sup>a</sup>  | NT <sup>a</sup> | NT <sup>a</sup> | NT <sup>a</sup> | NT <sup>a</sup> | NT <sup>a</sup> |
| SN12C                  | NI <sup>c</sup> | NI <sup>c</sup> | 1.79            | 10.04           | 16.4            | 14.77           | 48.59            | NI <sup>c</sup> | NI <sup>c</sup> | NI <sup>c</sup> | 0.32            | 16.34           |
| TK-10                  | 7.59            | 1.85            | NI <sup>c</sup> | NI <sup>c</sup> | 7.16            | 4.98            | 44.74            | NI <sup>c</sup> | NI <sup>c</sup> | NI <sup>c</sup> | 9.62            | 6.55            |
| UO-31                  | 16.7            | 18.31           | 10.68           | 14.89           | 20.41           | NI <sup>c</sup> | <u>76.22</u>     | 1.00            | 7.96            | 3.08            | 29.89           | 33.87           |
| <b>Prostate Cancer</b> |                 |                 |                 |                 |                 |                 |                  |                 |                 |                 |                 |                 |
| PC-3                   | 9.4             | 16.82           | 8.51            | 4.84            | 13.56           | 16.72           | 62.20            | NI <sup>c</sup> | NI <sup>c</sup> | NI <sup>c</sup> | 16.70           | 23.02           |
| DU-145                 | NI <sup>c</sup> | 0.73            | NI <sup>c</sup> | NI <sup>c</sup> | NI <sup>c</sup> | 5.48            | <u>91.48</u>     | NI <sup>c</sup> |

| Compound No.         | 11a             | 11b   | 11c             | 11d             | 11e             | 11f   | 17a <sup>b</sup> | 17b             | 18a             | 18b             | 19a   | 19b   |
|----------------------|-----------------|-------|-----------------|-----------------|-----------------|-------|------------------|-----------------|-----------------|-----------------|-------|-------|
| <b>Breast Cancer</b> |                 |       |                 |                 |                 |       |                  |                 |                 |                 |       |       |
| MCF7                 | 20.68           | 20.86 | 10.13           | 9.02            | 13.6            | 14.85 | <u>72.68</u>     | 14.89           | 27.12           | 24.04           | 20.64 | 25.87 |
| MDA-MB-231/ATCC      | 10.33           | 10.74 | 6.56            | NI <sup>c</sup> | 3.55            | 7.78  | 140.43           | NI <sup>c</sup> | NI <sup>c</sup> | 7.22            | 18.59 | 27.50 |
| HS 578T              | 9.19            | 10.87 | 12.28           | 13.67           | 6.47            | 14.44 | 47.16            | 10.30           | 11.98           | 10.41           | 33.05 | 29.69 |
| BT-549               | NI <sup>c</sup> | 6.06  | NI <sup>c</sup> | NI <sup>c</sup> | 3.17            | 3.72  | <u>95.48</u>     | 28.49           | 18.88           | 18.60           | 24.67 | 20.76 |
| T-47D                | 15.15           | 12.93 | 2.97            | 1.5             | 8.75            | 4.35  | 44.94            | 18.97           | 24.75           | 17.61           | 26.15 | 26.87 |
| MDA-MB-468           | NI <sup>c</sup> | 23.76 | NI <sup>c</sup> | NI <sup>c</sup> | NI <sup>c</sup> | 14.85 | <u>88.08</u>     | NI <sup>c</sup> | NI <sup>c</sup> | NI <sup>c</sup> | 20.09 | 21.60 |

**a: NT:** indicates that this compound was not tested.

**b:** These compounds were selected for five dose assays.

**c: NI:** No inhibition effect

**Table 5.** *In vitro* tumor 50% Growth Inhibition ( $GI_{50}$ ,  $\mu M$ ), of compounds (XI & XVIIa)

| Panel cell line                   | $GI_{50}$ ( $\mu M$ ) of the selected compounds |             |
|-----------------------------------|-------------------------------------------------|-------------|
|                                   | XVIIa                                           | XI          |
| <b>Leukemia</b>                   |                                                 |             |
| CCRF-CEM                          | 100                                             | 100         |
| HL-60 (TB)                        | 83.17                                           | 100         |
| K-562                             | 100                                             | 100         |
| MOLT-4                            | 100                                             | 100         |
| RPMI-8226                         | 5.49                                            | 100         |
| SR                                | NT <sup>a</sup>                                 | 100         |
| <b>Non small cell lung cancer</b> |                                                 |             |
| A549/ATCC                         | NT                                              | 65.10       |
| EKVX                              | <b>3.54</b>                                     | 25.20       |
| HOP-62                            | <b>1.82</b>                                     | 10.0        |
| HOP-92                            | <b>2.51</b>                                     | <b>3.18</b> |
| NCI-H226                          | 6.45                                            | 22.60       |
| NCI-H23                           | <b>3.54</b>                                     | 14.70       |
| NCI-H322M                         | 100                                             | 23.70       |
| NCI-H460                          | 34.67                                           | 21.30       |
| NCI-H522                          | 100                                             | <b>4.55</b> |
| <b>Colon cancer</b>               |                                                 |             |
| COLO 205                          | 100                                             | 100         |
| HCC-2998                          | 100                                             | 18.90       |
| HCT-116                           | 27.54                                           | 23.20       |
| HCT-15                            | 100                                             | 26.80       |
| HT29                              | 24.0                                            | 100         |
| KM12                              | 27.50                                           | 100         |
| SW-620                            | 100                                             | 100         |
| <b>CNS cancer</b>                 |                                                 |             |
| SF-268                            | <b>2.82</b>                                     | <b>6.91</b> |
| SF-295                            | <b>2.69</b>                                     | <b>7.23</b> |
| SF-539                            | NT <sup>a</sup>                                 | 11.10       |
| SNB-19                            | <b>2.75</b>                                     | 10.60       |
| SNB-75                            | <b>3.98</b>                                     | <b>3.92</b> |
| U251                              | NT <sup>a</sup>                                 | <b>6.94</b> |
| <b>Melanoma</b>                   |                                                 |             |
| LOX IMVI                          | 100                                             | 37.30       |
| MALME-3M                          | NT <sup>a</sup>                                 | 93.60       |
| M14                               | <b>2.57</b>                                     | 59.40       |
| MDA-MB-435                        | 5.89                                            | 100         |
| SK-MEL-2                          | <b>1.86</b>                                     | 11.30       |
| SK-MEL-28                         | <b>2.0</b>                                      | 100         |
| SK-MEL-5                          | NT <sup>a</sup>                                 | 100         |
| UACC-257                          | <b>3.24</b>                                     | <b>5.59</b> |
| UACC-62                           | <b>2.34</b>                                     | <b>4.07</b> |

**Table 5. (continued)**

| Panel/cell line        | GI <sub>50</sub> (μM) of XVIIa | GI <sub>50</sub> (μM) of XI |
|------------------------|--------------------------------|-----------------------------|
| <b>Ovarian cancer</b>  |                                |                             |
| IGROV1                 | 4.27                           | 26.80                       |
| OVCAR-3                | 5.62                           | 100                         |
| OVCAR-4                | NT <sup>a</sup>                | 100                         |
| OVCAR-5                | NT <sup>a</sup>                | 26.10                       |
| OVCAR-8                | <u>3.47</u>                    | 6.24                        |
| NCI/ADR-RES            | NT <sup>a</sup>                | 19.80                       |
| SK-OV-3                | NT <sup>a</sup>                | 15.30                       |
| <b>Renal cancer</b>    |                                |                             |
| 786-0                  | NT <sup>a</sup>                | 14.0                        |
| A498                   | <u>2.09</u>                    | 19.30                       |
| ACHN                   | 3.24                           | 17.90                       |
| CAKI-1                 | <u>2.57</u>                    | 100                         |
| RXF 393                | <u>1.66</u>                    | 6.60                        |
| SN12C                  | <u>3.02</u>                    | 18.90                       |
| TK-10                  | <u>2.82</u>                    | 24.60                       |
| UO-31                  | NT <sup>a</sup>                | 86.10                       |
| <b>Prostate cancer</b> |                                |                             |
| PC-3                   | <u>3.63</u>                    | 53.80                       |
| DU-145                 | 5.62                           | 17.90                       |
| <b>Breast cancer</b>   |                                |                             |
| MCF7                   | <u>2.44</u>                    | 100                         |
| MDA-MB-231/ATCC        | NT <sup>a</sup>                | 6.83                        |
| HS 578T                | <u>4.47</u>                    | 5.80                        |
| BT-549                 | 19.50                          | 9.25                        |
| T-47D                  | NT <sup>a</sup>                | 28.50                       |
| MDA-MB-468             | <u>1.66</u>                    | 16.40                       |

## 9. Molecular docking studies

**Table 6. The docking poses and amino acids involved in the binding interactions of the tested compounds with VEGFR-2 enzyme.**

| Compound code | C- docker interaction energy | Common Binding Interactions |                                                                                                                                |
|---------------|------------------------------|-----------------------------|--------------------------------------------------------------------------------------------------------------------------------|
| Sorafenib     | -52.93                       | <b>H- donor</b>             | Urea NH-----GLU885<br>Urea C=O-----ASP046<br>Pyridine amide NH-----CYS919                                                      |
|               |                              | <b>Arene-H</b>              | Pyridine ring-----LEU1035, PHE1047, LEU840, VAL848, ALA866<br>Phenyl ring-----ILE888, LEU889, ILE892, VAL898, LEU1019 & VAL916 |
| 8a            | -25.41                       | <b>H- donor</b>             | 2Urea NH-----GLU885                                                                                                            |
| 8b            | -39.83                       |                             | Urea C=S-----ASP1046                                                                                                           |
| 8c            | -26.32                       | <b>Arene-H</b>              | Pyridazine C=O-----CYS919,                                                                                                     |
| 8d            | -13.23                       |                             | Pyridazine NH-----GLU917                                                                                                       |
| 8e            | -36.14                       |                             | Pyridazine ring-----ALA866,                                                                                                    |
| 8f            | -38.31                       |                             | VAL848 & LEU1035                                                                                                               |
| 8g            | -28.09                       |                             | Phenyl ring-----ILE888, VAL916,                                                                                                |
| 8h            | -39.66                       |                             | LEU1019, LEU889 & LEU889                                                                                                       |
| 8i            | -26.90                       |                             |                                                                                                                                |
| 8j            | -29.46                       |                             |                                                                                                                                |
| 9a            | -25.56                       | <b>H- donor</b>             | 2Thiourea NH-----GLU885                                                                                                        |
| 9b            | -25.93                       |                             | 2Thiourea NH-----ASP1046                                                                                                       |
| 9c            | -27.22                       | <b>Arene-H</b>              | Pyridazine C=O-----CYS919                                                                                                      |
| 9d            | -23.29                       |                             | Pyridazine NH -----GLU917                                                                                                      |
| 10a           | -27.28                       | <b>H- donor</b>             | Phenyl ring-----ILE888,                                                                                                        |
|               |                              |                             | VAL848, ILE892, VAL916 & LYS868                                                                                                |
| 10b           | -27.99                       | <b>H- donor</b>             | Urea NH-----GLU885                                                                                                             |
| 10c           | -29.36                       |                             | 2Thiourea NH-----ASP1046                                                                                                       |
| 10d           | -25.23                       | <b>Arene-H</b>              | Pyridazine C=O-----CYS919                                                                                                      |
| 10e           | -20.83                       |                             | Pyridazine ring-----ALA866,                                                                                                    |
| 10f           | -28.42                       |                             | VAL848, LEU1035                                                                                                                |
| 10g           | -27.16                       |                             | Phenyl ring-----ILE888,                                                                                                        |
| 10h           | -31.24                       |                             | VAL848, LEU1035, LEU889, ALA866 &                                                                                              |
| 10i           | -28.71                       |                             | VAL916                                                                                                                         |
| 10j           | -27.69                       |                             |                                                                                                                                |
| 10k           | -27.98                       |                             |                                                                                                                                |
| 10l           | -30.05                       |                             |                                                                                                                                |

Table 6 (Continued)

| Compound code | C- docker interaction energy | Common Binding Interactions                                                      |                                                                                           |                                                 |
|---------------|------------------------------|----------------------------------------------------------------------------------|-------------------------------------------------------------------------------------------|-------------------------------------------------|
| 11a           | -24.15                       | <b>H- donor</b>                                                                  | Sulfonamide NH-----GLU885                                                                 |                                                 |
| 11b           | -20.24                       |                                                                                  | Sulfonamide S=O-----ASP1046                                                               |                                                 |
| 11c           | -25.39                       |                                                                                  | Pyridazine C=O-----CYS919,                                                                |                                                 |
| 11d           | -25.81                       |                                                                                  | Pyridazine NH-----GLU917                                                                  |                                                 |
| 11e           | -21.62                       |                                                                                  | <b>Arene-H</b>                                                                            | Pyridazine ring-----ALA866,<br>VAL848 & LEU1035 |
| 11f           | -20.36                       |                                                                                  |                                                                                           | Phenyl ring-----VAL916,<br>VAL848 & LEU889.     |
| 17a           | -32.65                       | <b>H- donor</b>                                                                  | 2Urea NH-----GLU885                                                                       |                                                 |
| 17b           | -30.73                       |                                                                                  | Thiourea C=S-----ASP1046                                                                  |                                                 |
|               |                              | <b>Arene-H</b>                                                                   | Pyridazine ring-----ALA866,<br>LEU1035 & PHE918                                           |                                                 |
|               |                              |                                                                                  | Phenyl ring-----ILE892,<br>VAL848, LEU1019, CYS1045, VAL916,<br>HIS1026, LEU889 & LEU889. |                                                 |
| 18a           | -34.98                       | <b>H- donor</b>                                                                  | Benzoyl Thiourea C=O -----CYS919                                                          |                                                 |
| 18b           | -32.54                       |                                                                                  | <b>Arene-H</b>                                                                            | Pyridazine ring----- LEU889                     |
|               |                              | Phenyl ring-----LEU840,<br>VAL848, CYS1045, VAL916, HIS1026,<br>LEU889 & VAL899. |                                                                                           |                                                 |
| 19a           | -28.04                       | <b>H- donor</b>                                                                  | Sulfonamide NH-----GLU885                                                                 |                                                 |
| 19b           | -24.98                       |                                                                                  | Sulfonamide S=O-----ASP1046                                                               |                                                 |
|               |                              | <b>Arene-H</b>                                                                   | Pyridazine ring----- ALA866,<br>LEU1035 & PHE918                                          |                                                 |
|               |                              |                                                                                  | Phenyl ring----- VAL848,<br>LEU1035, LEU1019, LEU889, ILE892,<br>VAL916& LEU889 & ALA866. |                                                 |

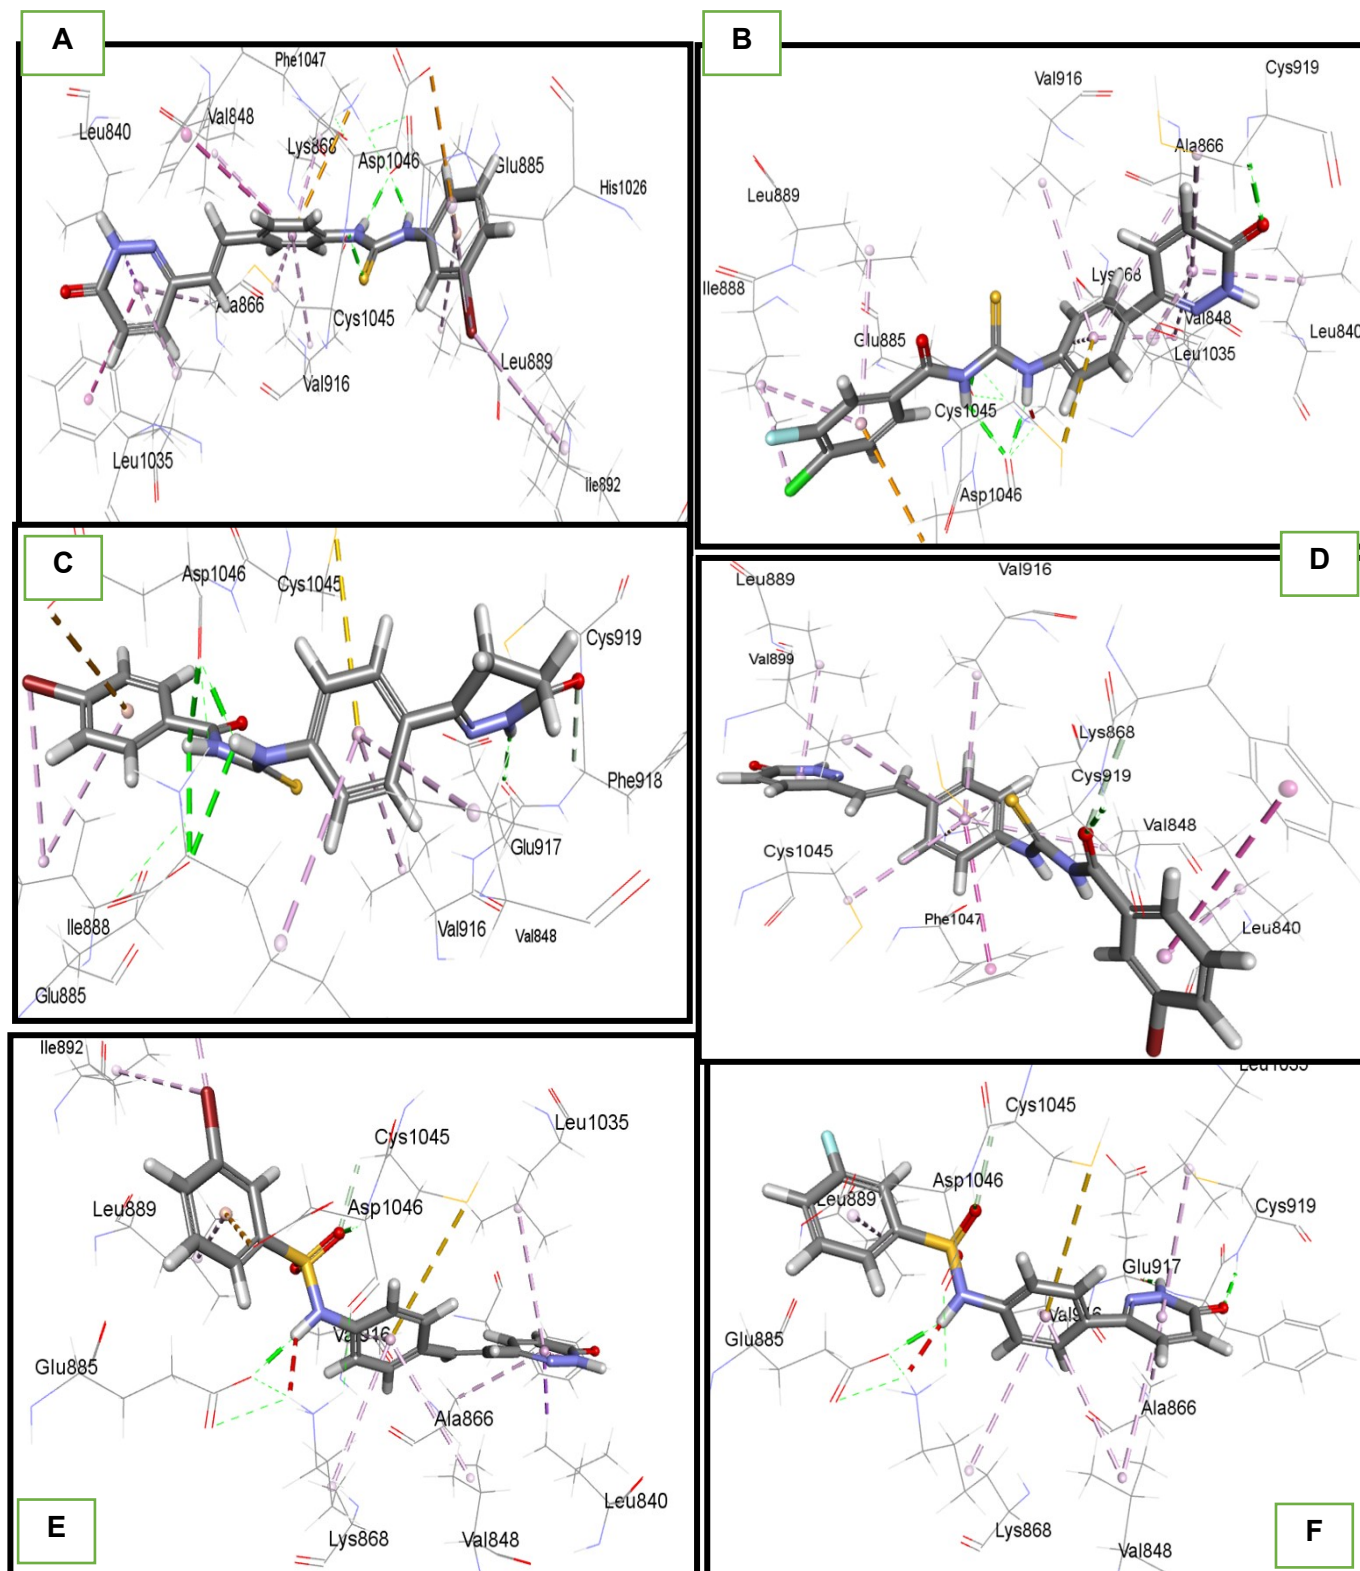

**Figure 44.** Docking poses (2D & 3D) and amino acids involved in the binding interactions of: [A] a representative compound of phenylthiourea in series I (8a), [B] series III (9j), [C] series II (9c), [D] series VI (18a), series IV (11c) and series VII (19a) into the active site.

## 10. Cell Cycle apoptosis

**Table 7. Primer's sequence used for *qRT-PCR* of lung cancer cell lines**

| <b>Gene</b> | <b>Primer sequence</b>                                         | <b>GenBank<br/>(accession no)</b> |
|-------------|----------------------------------------------------------------|-----------------------------------|
| Bcl-2       | F: CCT CGC TGC ACA AAT ACT CC<br>R: TGG AGA GAA TGT TGG CGT CT | M14745.1                          |
| P53         | F: TGG CCA TCT ACA AGC AGT CA<br>R: GGT ACA GTC AGA GCC AAC CT | X60020.1                          |
| BAX         | F: CTG TAT GTG GGA CTG GTG GT<br>R: GGA AAT GAG GGG TGG AAG GA | XM_054373112.1                    |
| GAPDH       | F: CAC ATC GCT CAG ACA CCA TG<br>R: TGA CGG TGC CAT GGA ATT TG | AK026525.1                        |

BCL-2: B-cell lymphoma-2 gene; *BAX*: Bcl-2-associated X protein encoding gene; *p53*: tumor suppressor gene.

## **11. Cell Cycle analysis**



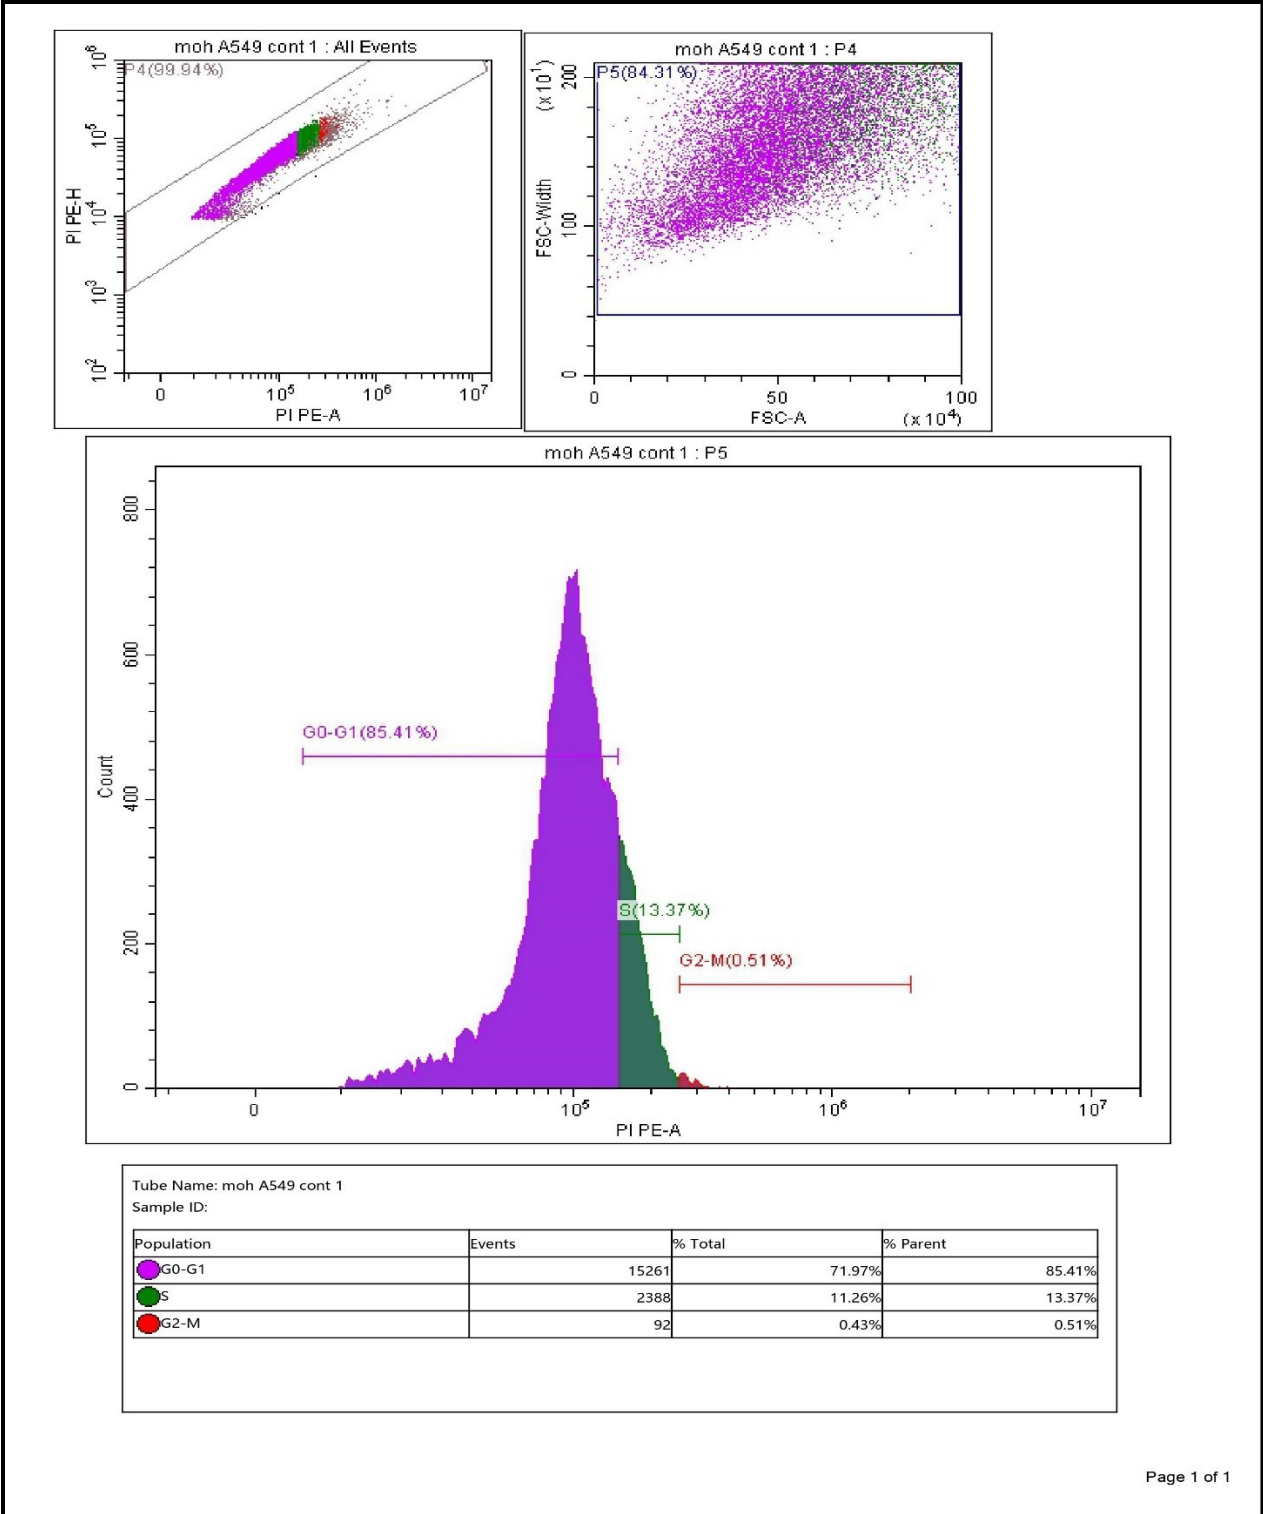

**Figure 45a. Histograms of the cell cycle and the cell distribution in A549/ATCC cell line (control 1).**

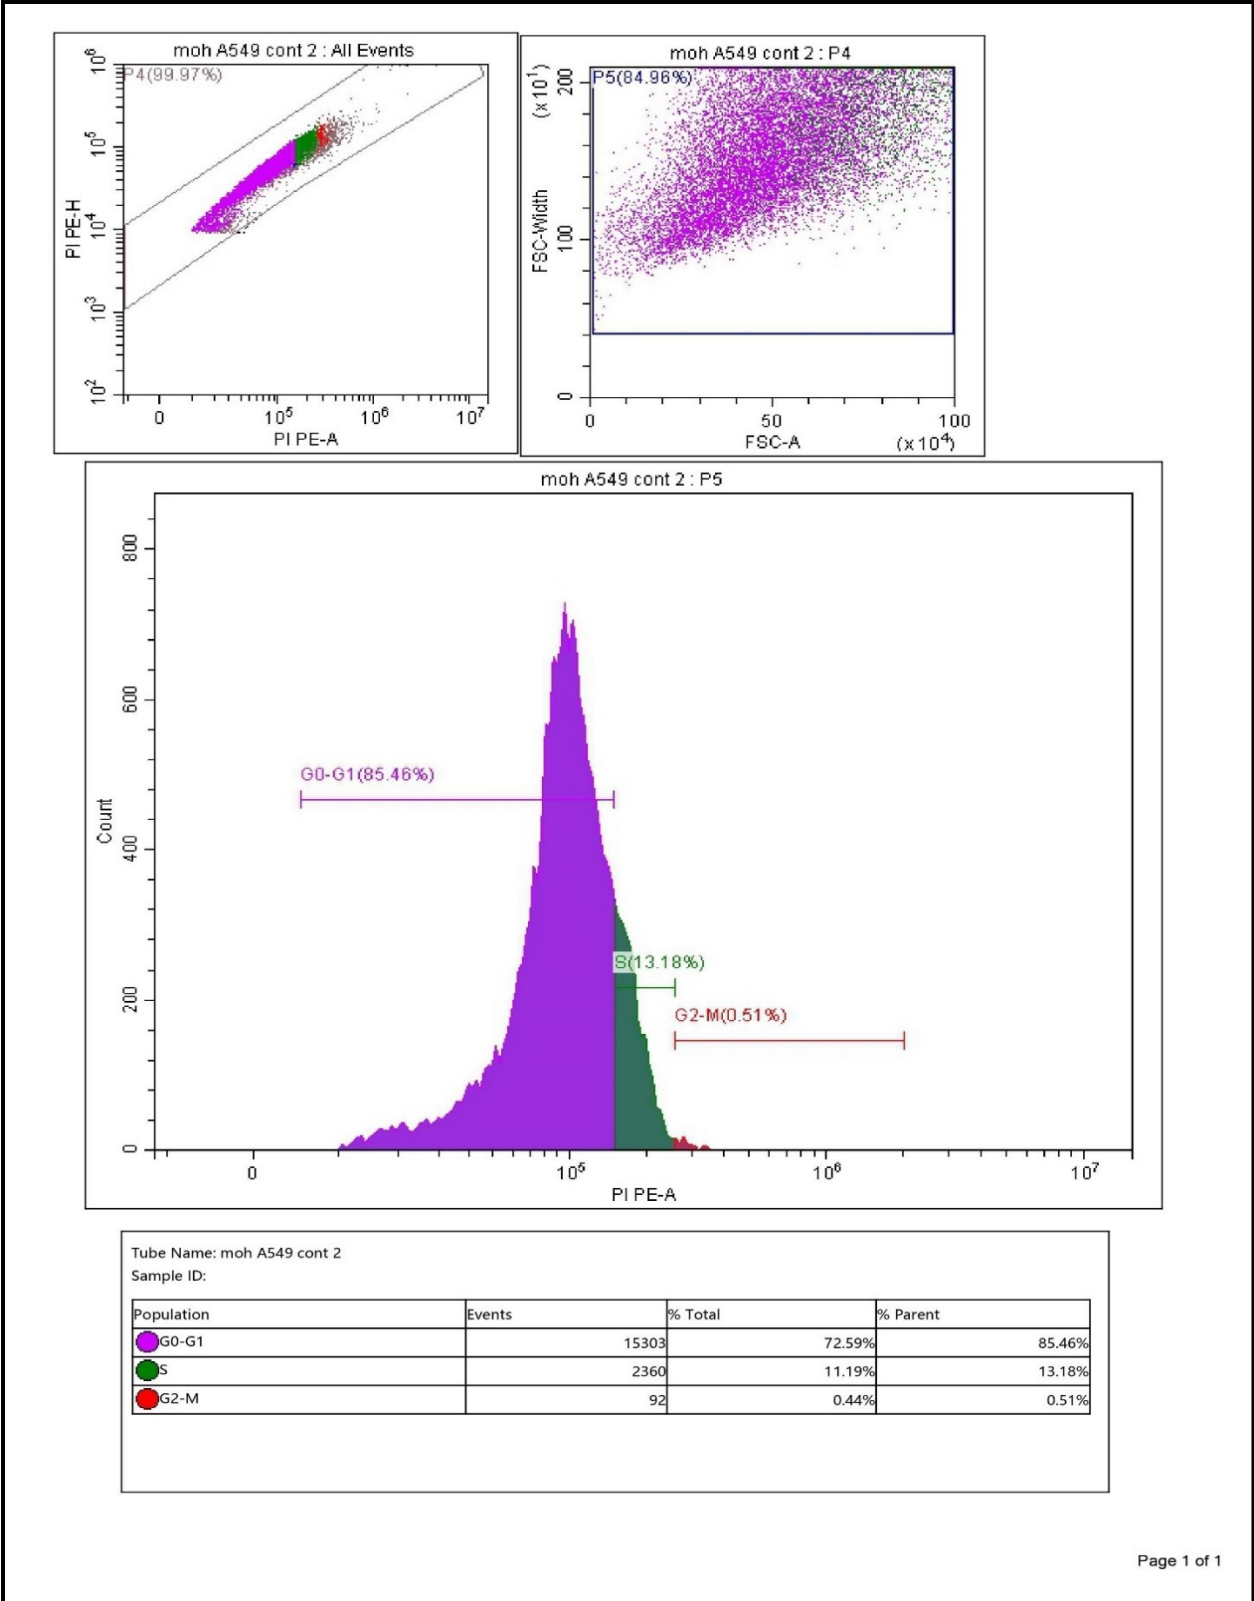

**Figure 45b. Histograms of the cell cycle and the cell distribution in A549/ATCC cell line (control 2).**

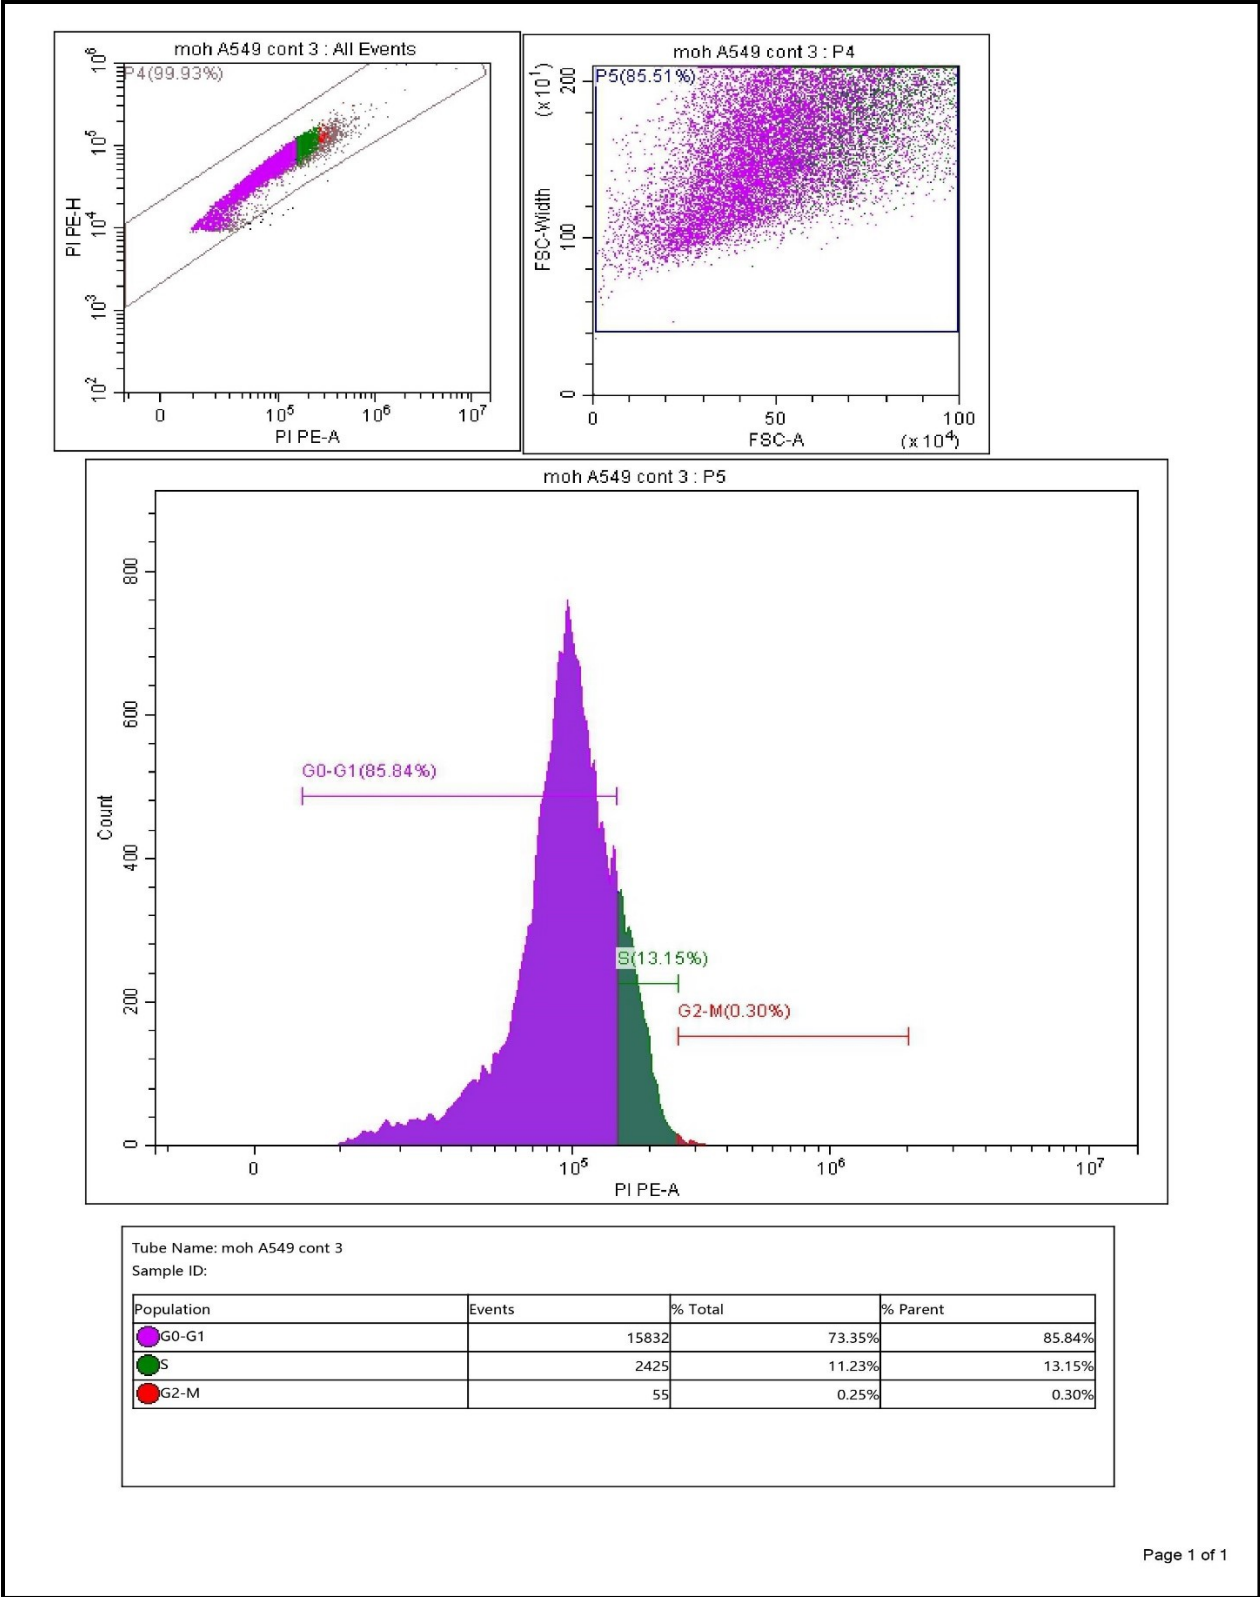

**Figure 45c. Histograms of the cell cycle and the cell distribution in A549/ATCC cell line (control 3).**

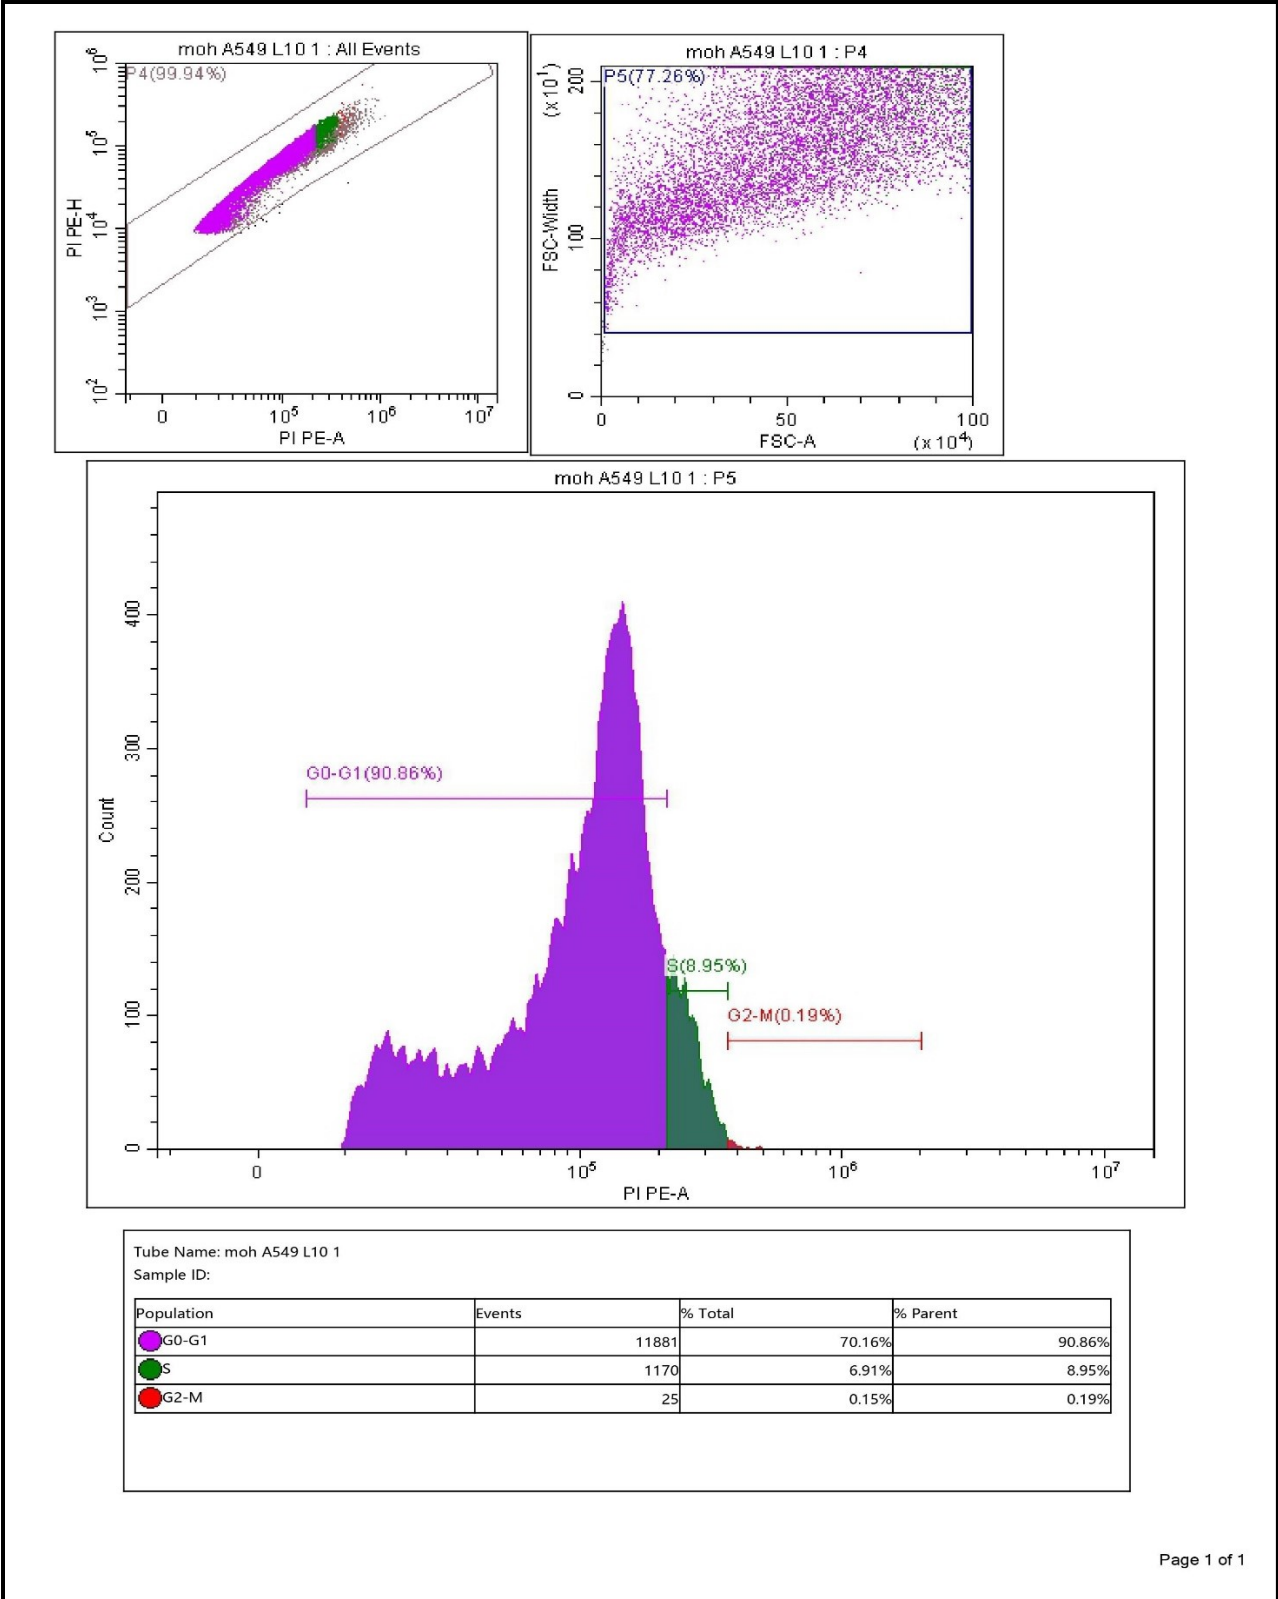

**Figure 45d. Histograms of the cell cycle and the cell distribution or compound 10I in A549/ATCC cell line (treatment 1).**

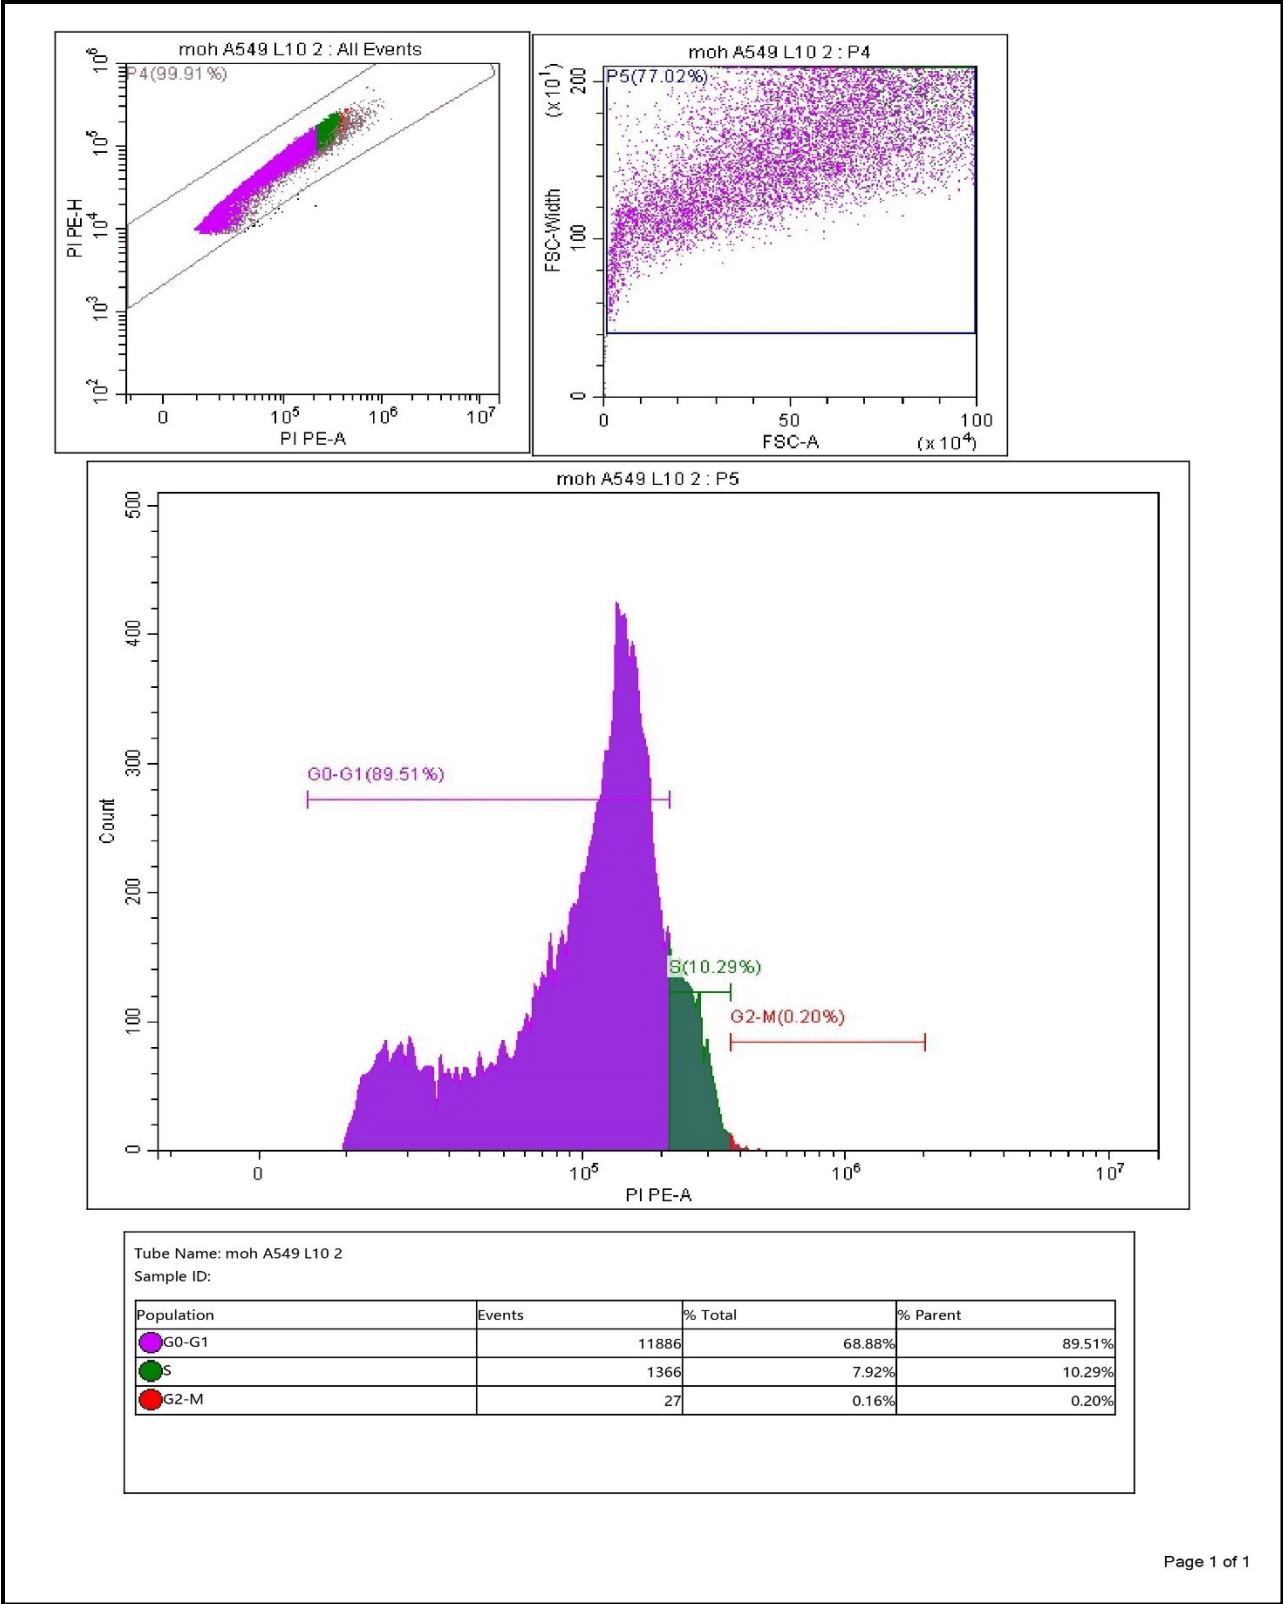

**Figure 45e. Histograms of the cell cycle and the cell distribution or compound 10I in A549/ATCC cell line (treatment 2).**

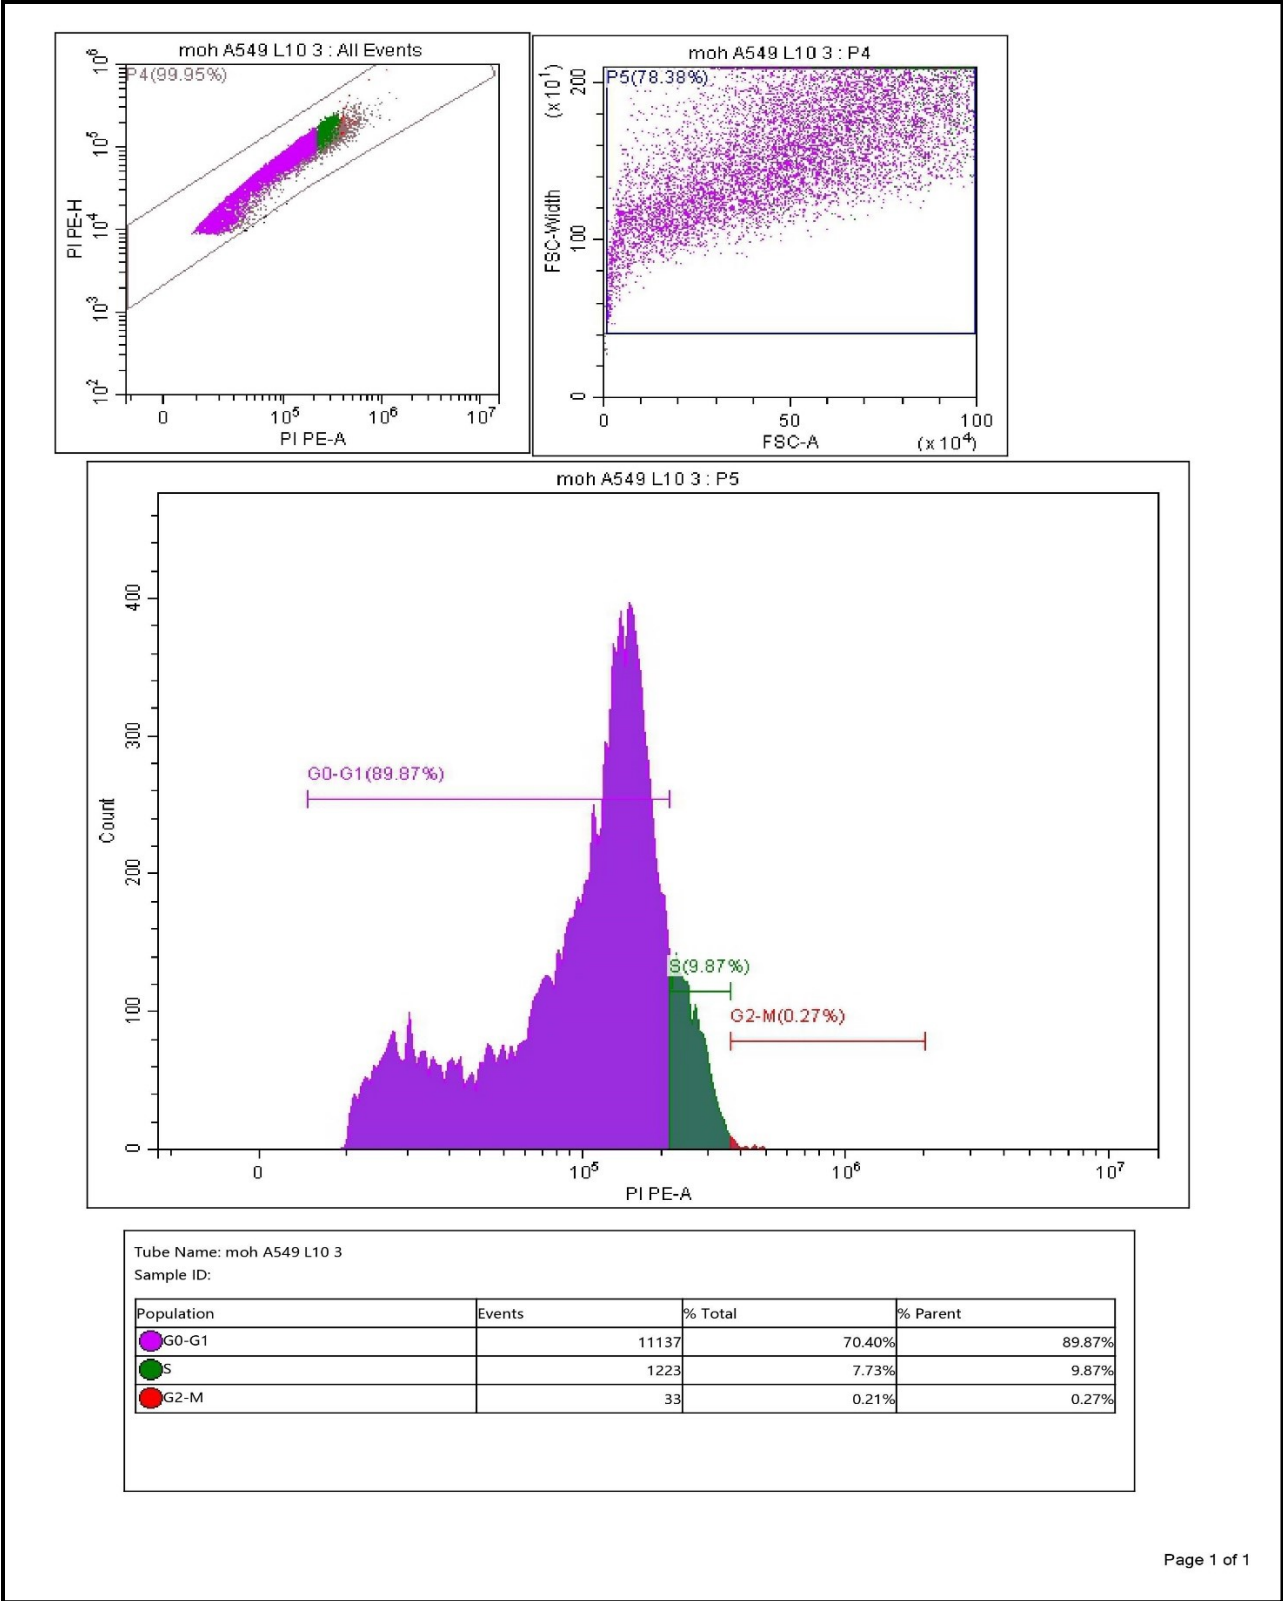

**Figure 45f. Histograms of the cell cycle and the cell distribution or compound 10I in A549/ATCC cell line (treatment 3).**
